# Supplementary material
Source: publisher figshare collection journal article supplement (https://acs.figshare.com/ndownloader/files/12822305)
Supplement: Supplementary file 1 [file 12822305]

## Sheet: Table name and caption 
Table S1. The lysine 2-hydroxyisobutyrylome data obtained in this work.

## Sheet: Combine
Identified K2-oh protein information					Quantification of K2-oh protein			Quantification of total protein			K2-oh protein normalized with total protein			Merge
Protein accession	Position	Amino acid	Protein description	Gene name	L/H Ratio repeat1	L/H Ratio repeat2	L/H Ratio repeat3	L/H Ratio repeat1	L/H Ratio repeat2	L/H Ratio repeat3	L/H Ratio repeat1	L/H Ratio repeat2	L/H Ratio repeat3	L/H Ratio	L/H P value
Q8WWQ0	873	K	PH-interacting protein	PHIP	7.404			0.6			12.34			12.34
Q8WWQ0	871	K	PH-interacting protein	PHIP	7.404			0.6			12.34			12.34
Q9BZZ5	180	K	Apoptosis inhibitor 5	API5			8.526	1.15	1.16	1.15			7.41391	7.41391
Q14978	301	K	Nucleolar and coiled-body phosphoprotein 1	NOLC1		4.828		1	1.04	1.09		4.64231		4.64231
P23526	405	K	Adenosylhomocysteinase	AHCY	6.708		2.797	1.06	1.06	1.07	6.3283		2.61402	4.47116	0.41236
Q13501	13	K	Sequestosome-1	SQSTM1	1.189	1.123	1.145	0.26	0.26	0.27	4.57308	4.31923	4.24074	4.37768	0.0013198
Q9BQG0	1317	K	Myb-binding protein 1A	MYBBP1A	2.601	2.366	2.454	0.61	0.64	0.62	4.26393	3.69687	3.95806	3.97296	0.00452617
O00767	196	K	Acyl-CoA desaturase	SCD	2.565	3.935	2.101	0.73	0.72	0.73	3.5137	5.46528	2.87808	3.95235	0.0903598
Q96QD8	59	K	Sodium-coupled neutral amino acid transporter 2	SLC38A2	1.514	1.537	1.653	0.38	0.44	0.4	3.98421	3.49318	4.1325	3.86996	0.00672857
Q8WXX5	205	K	DnaJ homolog subfamily C member 9	DNAJC9			4.063	1.12	1.07	1.06			3.83302	3.83302
P11388	1459	K	DNA topoisomerase 2-alpha	TOP2A		2.968		0.82	0.79	0.82		3.75696		3.75696
P18206	581	K	Vinculin	VCL		6.163		1.65	1.67	1.67		3.69042		3.69042
Q8WW12	81	K	PEST proteolytic signal-containing nuclear protein	PCNP	4.013		2.645	0.88	0.87	0.94	4.56023		2.81383	3.68703	0.274248
P28370	493	K	Probable global transcription activator SNF2L1	SMARCA1	0.942			0.26	0.49	0.53	3.62308			3.62308
P68104	376	K	Elongation factor 1-alpha 1	EEF1A1	3.357	3.315	3.143	0.92	0.9	0.91	3.64891	3.68333	3.45385	3.59536	0.00113501
P61160	388	K	Actin-related protein 2	ACTR2	3.666			1.02	1.04	1.05	3.59412			3.59412
P29144	1067	K	Tripeptidyl-peptidase 2	TPP2			4.356	1.33	1.37	1.29			3.37674	3.37674
O00151	262	K	PDZ and LIM domain protein 1	PDLIM1		5.364		1.61	1.6	1.53		3.3525		3.3525
P02786	205	K	Transferrin receptor protein 1	TFRC	1.905		2.528	0.67	0.66	0.68	2.84328		3.71765	3.28047	0.168546
P06733	262	K	Alpha-enolase	ENO1			3.206	0.98	0.99	0.98			3.27143	3.27143
P09972	101	K	Fructose-bisphosphate aldolase C	ALDOC	3.925		3.696	1.24	1.14	1.13	3.16532		3.2708	3.21806	0.021398
P20020	359	K	Plasma membrane calcium-transporting ATPase 1	ATP2B1	3.164			1.01	0.98	1.02	3.13267			3.13267
P46013	993	K	Antigen KI-67	MKI67			2.298	0.75	0.73	0.74			3.10541	3.10541
Q92614	1884	K	Unconventional myosin-XVIIIa	MYO18A			3.716	1.23	1.18	1.21			3.07107	3.07107
Q86YT6	452	K	E3 ubiquitin-protein ligase MIB1	MIB1		2.36	2.129		0.77			3.06494		3.06494
Q01581	100	K	Hydroxymethylglutaryl-CoA synthase, cytoplasmic	HMGCS1	3.079			1.01	1.01	1.04	3.04851			3.04851
Q9NR30	104	K	Nucleolar RNA helicase 2	DDX21		1.971		0.66	0.65	0.64		3.03231		3.03231
P05067	495	K	Amyloid beta A4 protein	APP			1.3	0.57	0.59	0.43			3.02326	3.02326
P60891	102	K	Ribose-phosphate pyrophosphokinase 2	PRPS2			2.811	0.97	0.92	0.93			3.02258	3.02258
P11388	622	K	DNA topoisomerase 2-alpha	TOP2A		2.38		0.82	0.79	0.82		3.01266		3.01266
P11021	581	K	78 kDa glucose-regulated protein	HSPA5	3.249	3.303	3.665	1.15	1.16	1.14	2.82522	2.84741	3.21491	2.96251	0.00616122
P11388	1433	K	DNA topoisomerase 2-alpha	TOP2A	2.359	2.404		0.82	0.79	0.82	2.87683	3.04304		2.95993	0.0381292
P40189	715	K	Interleukin-6 receptor subunit beta	IL6ST	1.52			0.52	0.73	0.68	2.92308			2.92308
Q96A49	84	K	Synapse-associated protein 1	SYAP1	3.91	3.557		1.28	1.28	1.31	3.05469	2.77891		2.9168	0.0645449
P63096	192	K	Guanine nucleotide-binding protein G(i) subunit alpha-2	GNAI2		1.913	2.546	0.73	0.79	0.75		2.42152	3.39467	2.90809	0.220344
P26639	306	K	Threonine--tRNA ligase, cytoplasmic	TARS	1.88	2.346	2.661	0.78	0.8	0.79	2.41026	2.9325	3.36835	2.9037	0.0303112
P25705	167	K	ATP synthase subunit alpha, mitochondrial	ATP5A1			2.922	1.01	1.02	1.01			2.89307	2.89307
P11387	252	K	DNA topoisomerase 1	TOP1			2.501	0.86	0.92	0.87			2.87471	2.87471
P46060	8	K	Ran GTPase-activating protein 1	RANGAP1	2.757			0.96	0.92	0.97	2.87188			2.87188
P19338	70	K	Nucleolin	NCL	2.002	2.141	1.93	0.71	0.71	0.7	2.81972	3.01549	2.75714	2.86412	0.00260347
P47813	104	K	Eukaryotic translation initiation factor 1A, Y-chromosomal	EIF1AY	3.798			1.34	1.27	1.25	2.83433			2.83433
P33991	752	K	DNA replication licensing factor MCM4	MCM4	1.725	1.847	3.206	0.8	0.8	0.8	2.15625	2.30875	4.0075	2.82417	0.128738
Q9NRG0	102	K	Chromatin accessibility complex protein 1	CHRAC1	2.149	1.751	1.841			0.66			2.78939	2.78939
Q96A65	868	K	Exocyst complex component 4	EXOC4	2.736			0.99	1.04	1.02	2.76364			2.76364
P36578	411	K	60S ribosomal protein L4	RPL4		2.466	2.447	0.87	0.89	0.89		2.77079	2.74944	2.76011	0.00545981
O60826	508	K	Coiled-coil domain-containing protein 22	CCDC22		2.363		0.87	0.86	0.84		2.74767		2.74767
Q9UNX4	778	K	WD repeat-containing protein 3	WDR3	2.365			0.87	0.88	0.85	2.71839			2.71839
P46013	251	K	Antigen KI-67	MKI67			2.01	0.75	0.73	0.74			2.71622	2.71622
P42766	86	K	60S ribosomal protein L35	RPL35	1.877	2.1	2.334	0.79	0.81	0.74	2.37595	2.59259	3.15405	2.70753	0.026559
Q9Y3B8	173	K	Oligoribonuclease, mitochondrial	REXO2	2.485			0.92	0.96	0.95	2.70109			2.70109
Q9Y287	226	K	Integral membrane protein 2B	ITM2B	1.194	1.103	1.172	0.4	0.46		2.985	2.39783		2.69141	0.153242
Q96KB5	161	K	Lymphokine-activated killer T-cell-originated protein kinase	PBK	2.17	1.969	1.876	0.76	0.74	0.74	2.85526	2.66081	2.53514	2.68374	0.00455684
Q9NR30	18	K	Nucleolar RNA helicase 2	DDX21	1.887	1.601		0.66	0.65	0.64	2.85909	2.46308		2.66108	0.106321
Q9Y3T9	52	K	Nucleolar complex protein 2 homolog	NOC2L			2.259	0.94	0.84	0.85			2.65765	2.65765
Q96KB5	64	K	Lymphokine-activated killer T-cell-originated protein kinase	PBK	1.996			0.76	0.74	0.74	2.62632			2.62632
Q8NEJ9	48	K	Neuroguidin	NGDN	2.018			0.77	0.87	0.8	2.62078			2.62078
P17480	486	K	Nucleolar transcription factor 1	UBTF			1.307	0.57	0.54	0.51			2.56275	2.56275
Q9UMY1	109	K	Nucleolar protein 7	NOL7	1.577			0.62	0.79	0.77	2.54355			2.54355
P52597	224	K	Heterogeneous nuclear ribonucleoprotein F	HNRNPF	2.107			0.83	0.85	0.86	2.53855			2.53855
P46013	1330	K	Antigen KI-67	MKI67	1.761	2.099	1.767	0.75	0.73	0.74	2.348	2.87534	2.38784	2.53706	0.0177631
P11388	480	K	DNA topoisomerase 2-alpha	TOP2A	2.156	1.925		0.82	0.79	0.82	2.62927	2.43671		2.53299	0.0563966
Q99615	41	K	DnaJ homolog subfamily C member 7	DNAJC7	1.743			0.69	0.74	0.72	2.52609			2.52609
P02786	693	K	Transferrin receptor protein 1	TFRC	1.688			0.67	0.66	0.68	2.5194			2.5194
P11388	265	K	DNA topoisomerase 2-alpha	TOP2A	2.16	2.09	1.851	0.82	0.79	0.82	2.63415	2.64557	2.25732	2.51234	0.0105029
P08238	565	K	Heat shock protein HSP 90-beta	HSP90AB1	2.73	3.032	1.45	0.92	1.02	0.91	2.96739	2.97255	1.59341	2.51112	0.114947
P42677	5	K	40S ribosomal protein S27	RPS27	2.237	2.485		0.93	0.95	0.91	2.40538	2.61579		2.51058	0.0625021
Q96AG4	33	K	Leucine-rich repeat-containing protein 59	LRRC59	1.89	3.596	1.715	0.98	0.94	0.97	1.92857	3.82553	1.76804	2.50738	0.203522
Q9UKM9	165	K	RNA-binding protein Raly	RALY			2.625	1.05	1.07	1.05			2.5	2.5
Q8WVX9	29	K	Fatty acyl-CoA reductase 1	FAR1		3.562		1.1	1.43	1.2		2.49091		2.49091
P62249	90	K	40S ribosomal protein S16	RPS16	2.236			0.9	0.87	0.93	2.48444			2.48444
P46013	1452	K	Antigen KI-67	MKI67		1.86	1.78	0.75	0.73	0.74		2.54795	2.40541	2.47668	0.0433854
Q99880	6	K	Histone H2B type 1-L	HIST1H2BL	2.293	2.385	2.158	0.94	0.89	0.94	2.43936	2.67978	2.29574	2.47163	0.00858083
P52292	108	K	Importin subunit alpha-1	KPNA2	3.76	3.096	2.936	1.3	1.33	1.36	2.89231	2.32782	2.15882	2.45965	0.0329228
P06493	274	K	Cyclin-dependent kinase 1	CDK1		1.807	1.704	0.7	0.67	0.77		2.69701	2.21299	2.455	0.147078
P11388	1070	K	DNA topoisomerase 2-alpha	TOP2A	2.024	1.994	1.907	0.82	0.79	0.82	2.46829	2.52405	2.32561	2.43932	0.00251849
O14578	848	K	Citron Rho-interacting kinase	CIT	2.066	2.347	2.157		0.93	0.93		2.52366	2.31935	2.42151	0.0644761
P36578	423	K	60S ribosomal protein L4	RPL4	2.142	2.154	2.099	0.87	0.89	0.89	2.46207	2.42022	2.35843	2.41357	0.000679571
Q9BZE4	371	K	Nucleolar GTP-binding protein 1	GTPBP4		1.712		0.74	0.71	0.69		2.41127		2.41127
P15144	943	K	Aminopeptidase N	ANPEP	0.874	0.838	0.881	0.35	0.37	0.36	2.49714	2.26486	2.44722	2.40308	0.00377555
P11388	1062	K	DNA topoisomerase 2-alpha	TOP2A	1.97			0.82	0.79	0.82	2.40244			2.40244
Q14847	96	K	LIM and SH3 domain protein 1	LASP1			2.425	0.99	1.01	1.01			2.40099	2.40099
Q8NEJ9	98	K	Neuroguidin	NGDN	1.837			0.77	0.87	0.8	2.38571			2.38571
P46087	91	K	Probable 28S rRNA (cytosine(4447)-C(5))-methyltransferase	NOP2	1.811			0.76	0.77	0.73	2.38289			2.38289
Q07157	1282	K	Tight junction protein ZO-1	TJP1		2.54		1.08	1.07	1.05		2.37383		2.37383
Q9Y6Y8	931	K	SEC23-interacting protein	SEC23IP	2.918			1.23	1.21	1.22	2.37236			2.37236
P35241	72	K	Radixin	RDX			2.532	1.07	1.12	1.07			2.36636	2.36636
Q9NTJ3	679	K	Structural maintenance of chromosomes protein 4	SMC4	1.964			0.83	0.86	0.86	2.36627			2.36627
P15144	125	K	Aminopeptidase N	ANPEP	0.915	0.777	0.857	0.35	0.37	0.36	2.61429	2.1	2.38056	2.36495	0.0173332
P11388	606	K	DNA topoisomerase 2-alpha	TOP2A			1.933	0.82	0.79	0.82			2.35732	2.35732
P36578	399	K	60S ribosomal protein L4	RPL4		2.084	2.107	0.87	0.89	0.89		2.34157	2.36742	2.35449	0.00858815
O43592	627	K	Exportin-T	XPOT		1.765		0.75	0.75	0.82		2.35333		2.35333
P42696	261	K	RNA-binding protein 34	RBM34	1.808			0.77	0.73	0.66	2.34805			2.34805
O95347	1025	K	Structural maintenance of chromosomes protein 2	SMC2	2.346	2.085		0.94	0.95	0.93	2.49574	2.19474		2.34524	0.0998982
P11388	1011	K	DNA topoisomerase 2-alpha	TOP2A	1.701	2.098	1.882	0.82	0.79	0.82	2.07439	2.6557	2.29512	2.34174	0.0230906
Q92621	839	K	Nuclear pore complex protein Nup205	NUP205	1.777			0.76	0.79	0.77	2.33816			2.33816
P52292	49	K	Importin subunit alpha-1	KPNA2		3.109		1.3	1.33	1.36		2.33759		2.33759
Q9Y6M7	222	K	Sodium bicarbonate cotransporter 3	SLC4A7	1.788		1.551	0.77	0.78	0.66	2.32208		2.35	2.33604	0.00940724
Q92616	2258	K	Translational activator GCN1	GCN1L1	2.32	1.909		0.91	0.9	0.89	2.54945	2.12111		2.33528	0.142002
Q9Y3B9	207	K	RRP15-like protein	RRP15		1.575	1.412	0.68	0.67	0.61		2.35075	2.31475	2.33275	0.0121555
Q9Y2W1	371	K	Thyroid hormone receptor-associated protein 3	THRAP3			2.301	1.04	1.03	0.99			2.32424	2.32424
P46783	25	K	40S ribosomal protein S10	RPS10			2.183	0.97	0.99	0.94			2.32234	2.32234
O60488	500	K	Long-chain-fatty-acid--CoA ligase 4	ACSL4	2.877			1.24	1.27	1.27	2.32016			2.32016
Q15758	537	K	Neutral amino acid transporter B(0)	SLC1A5		1.413	1.991	0.89	0.75	0.73		1.884	2.7274	2.3057	0.272759
P36578	405	K	60S ribosomal protein L4	RPL4		2.214	1.885	0.87	0.89	0.89		2.48764	2.11798	2.30281	0.126056
O60488	690	K	Long-chain-fatty-acid--CoA ligase 4	ACSL4	2.855			1.24	1.27	1.27	2.30242			2.30242
P04075	13	K	Fructose-bisphosphate aldolase A	ALDOA	2.378	2.207	2.367	1.01	1	1.01	2.35446	2.207	2.34356	2.30167	0.00198654
Q9BRX5	80	K	DNA replication complex GINS protein PSF3	GINS3	1.596	2.079	1.908	0.77	0.72	1	2.07273	2.8875	1.908	2.28941	0.0736956
Q9UL25	66	K	Ras-related protein Rab-21	RAB21	1.99			0.87	0.84	0.92	2.28736			2.28736
P25440	732	K	Bromodomain-containing protein 2	BRD2		5.425	4.758		2.34	2.12		2.31838	2.24434	2.28136	0.0259955
Q14978	452	K	Nucleolar and coiled-body phosphoprotein 1	NOLC1		2.37		1	1.04	1.09		2.27885		2.27885
P49790	977	K	Nuclear pore complex protein Nup153	NUP153		1.562		0.71	0.69	0.73		2.26377		2.26377
O00571	335	K	ATP-dependent RNA helicase DDX3X	DDX3X		2.145		0.9	0.95	0.93		2.25789		2.25789
P61254	28	K	60S ribosomal protein L26	RPL26	1.836	1.828			0.81	0.81		2.25679		2.25679
Q9BVI4	246	K	Nucleolar complex protein 4 homolog	NOC4L	1.557			0.69	0.77	0.66	2.25652			2.25652
P63173	4	K	60S ribosomal protein L38	RPL38	2.158	2.022		0.93	0.93	0.95	2.32043	2.17419		2.24731	0.0526568
P14324	112	K	Farnesyl pyrophosphate synthase	FDPS	1.6	1.479	1.439	0.7	0.63	0.69	2.28571	2.34762	2.08551	2.23961	0.00605196
P11387	223	K	DNA topoisomerase 1	TOP1	1.924			0.86	0.92	0.87	2.23721			2.23721
P11388	342	K	DNA topoisomerase 2-alpha	TOP2A	1.847	1.775	1.809	0.82	0.79	0.82	2.25244	2.24684	2.2061	2.23512	0.000209615
P50991	21	K	T-complex protein 1 subunit delta	CCT4	2.006		2.196	0.94	0.94	0.94	2.13404		2.33617	2.23511	0.0733431
P21796	96	K	Voltage-dependent anion-selective channel protein 1	VDAC1	1.394	2.253		0.81	0.82	0.82	1.72099	2.74756		2.23427	0.33845
Q69YQ0	618	K	Cytospin-A	SPECC1L	1.987			0.89	0.76	0.79	2.23258			2.23258
P06753	232	K	Tropomyosin alpha-3 chain	TPM3	2.661	2.864	2.763	1.23	1.31	1.19	2.16341	2.18626	2.32185	2.22384	0.00243953
Q92887	402	K	Canalicular multispecific organic anion transporter 1	ABCC2	0.755			0.34	0.33	0.32	2.22059			2.22059
P13639	512	K	Elongation factor 2	EEF2	2.554		2.369	1.12	1.12	1.1	2.28036		2.15364	2.217	0.0467887
P15144	922	K	Aminopeptidase N	ANPEP		0.82		0.35	0.37	0.36		2.21622		2.21622
Q14847	49	K	LIM and SH3 domain protein 1	LASP1	2.192			0.99	1.01	1.01	2.21414			2.21414
Q9Y6G9	94	K	Cytoplasmic dynein 1 light intermediate chain 1	DYNC1LI1		2.037		0.91	0.92	0.91		2.21413		2.21413
P12236	199	K	ADP/ATP translocase 1	SLC25A4	2.154	3.128	2.648	1.31	1.17	1.14	1.64427	2.6735	2.32281	2.21353	0.0817231
P42677	16	K	40S ribosomal protein S27	RPS27	2.096	2.024	2.041	0.93	0.95	0.91	2.25376	2.13053	2.24286	2.20905	0.00158811
Q99614	128	K	Tetratricopeptide repeat protein 1	TTC1	3.113		1.545	1.41			2.2078			2.2078
O14776	1011	K	Transcription elongation regulator 1	TCERG1			1.81	0.81	0.77	0.82			2.20732	2.20732
Q9NR30	658	K	Nucleolar RNA helicase 2	DDX21			1.412	0.66	0.65	0.64			2.20625	2.20625
Q16778	44	K	Histone H2B type 2-E	HIST2H2BE	1.366	1.985			0.9			2.20556		2.20556
Q15758	247	K	Neutral amino acid transporter B(0)	SLC1A5	1.958			0.89	0.75	0.73	2.2			2.2
Q14696	95	K	LDLR chaperone MESD	MESDC2	1.798	1.769	1.887	0.8	0.87	0.82	2.2475	2.03333	2.30122	2.19402	0.0069708
Q9P0I2	253	K	ER membrane protein complex subunit 3	EMC3			2.032	1.07	0.96	0.93			2.18495	2.18495
O76021	373	K	Ribosomal L1 domain-containing protein 1	RSL1D1	1.324	1.581	1.679	0.7	0.69	0.71	1.89143	2.2913	2.36479	2.18251	0.0224269
Q69YQ0	195	K	Cytospin-A	SPECC1L		1.657		0.89	0.76	0.79		2.18026		2.18026
P55263	61	K	Adenosine kinase	ADK	2.039	3.567	3.34	1.43	1.32	1.39	1.42587	2.70227	2.40288	2.17701	0.130147
Q9H993	73	K	UPF0364 protein C6orf211	C6orf211	2.372			1.09	1.49	1.62	2.17615			2.17615
P0CW22	72	K	40S ribosomal protein S17-like	RPS17L	2			0.92	0.97	0.95	2.17391			2.17391
Q9BUQ8	259	K	Probable ATP-dependent RNA helicase DDX23	DDX23		1.56	2.3	0.85	0.86	0.91		1.81395	2.52747	2.17071	0.259047
P22102	251	K	Trifunctional purine biosynthetic protein adenosine-3	GART			1.865	0.82	0.82	0.86			2.1686	2.1686
P11166	245	K	Solute carrier family 2, facilitated glucose transporter member 1	SLC2A1	2.286	2.632	2.023	1.04	1.11	1.05	2.19808	2.37117	1.92667	2.1653	0.0179873
O75369	2524	K	Filamin-B	FLNB		4.068		1.89	1.88	1.89		2.16383		2.16383
P11388	1058	K	DNA topoisomerase 2-alpha	TOP2A	1.852	1.586	1.823	0.82	0.79	0.82	2.25854	2.00759	2.22317	2.1631	0.00674993
O00560	179	K	Syntenin-1	SDCBP	1.879	2.32	2.263	0.99	1	1	1.89798	2.32	2.263	2.16033	0.0189208
Q9NQW6	769	K	Actin-binding protein anillin	ANLN		1.745		0.92	0.81	0.98		2.15432		2.15432
P41250	197	K	Glycine--tRNA ligase	GARS		2.556	1.43	0.93	0.92	0.94		2.77826	1.52128	2.14977	0.418951
P62241	128	K	40S ribosomal protein S8	RPS8			1.977	0.92	0.92	0.92			2.14891	2.14891
P53367	124	K	Arfaptin-1	ARFIP1	2.673		2.795	0.99	1.82	1.76	2.7		1.58807	2.14403	0.383326
Q86UP2	971	K	Kinectin	KTN1			2.207	1.06	1.05	1.03			2.14272	2.14272
Q13442	172	K	28 kDa heat- and acid-stable phosphoprotein	PDAP1	2.269			1.06	1.09	1.09	2.14057			2.14057
P53396	167	K	ATP-citrate synthase	ACLY		2.011		0.95	0.94	0.95		2.13936		2.13936
Q7L2H7	115	K	Eukaryotic translation initiation factor 3 subunit M	EIF3M		1.946		0.9	0.91	0.91		2.13846		2.13846
P82933	119	K	28S ribosomal protein S9, mitochondrial	MRPS9		1.729		0.84	0.81	0.88		2.13457		2.13457
P07910	223	K	Heterogeneous nuclear ribonucleoproteins C1/C2	HNRNPC	1.499		2.545	0.96	0.94	0.94	1.56146		2.70745	2.13445	0.394868
Q8NC51	122	K	Plasminogen activator inhibitor 1 RNA-binding protein	SERBP1			2.174	1.02	1.02	1.02			2.13137	2.13137
Q14978	510	K	Nucleolar and coiled-body phosphoprotein 1	NOLC1	2.192	2.255	2.211	1	1.04	1.09	2.192	2.16827	2.02844	2.12957	0.00304699
P17174	55	K	Aspartate aminotransferase, cytoplasmic	GOT1	3.363			1.58	1.57	1.49	2.12848			2.12848
P11388	1159	K	DNA topoisomerase 2-alpha	TOP2A			1.744	0.82	0.79	0.82			2.12683	2.12683
Q86VS8	545	K	Protein Hook homolog 3	HOOK3	1.658			0.78	0.94	0.91	2.12564			2.12564
P60891	194	K	Ribose-phosphate pyrophosphokinase 1	PRPS1			1.976	0.97	0.92	0.93			2.12473	2.12473
O00422	74	K	Histone deacetylase complex subunit SAP18	SAP18	1.763			0.83	0.91	0.85	2.1241			2.1241
Q9HB71	143	K	Calcyclin-binding protein	CACYBP	2.145			1.01	1.01	0.97	2.12376			2.12376
Q9UHV9	111	K	Prefoldin subunit 2	PFDN2	1.995			0.94	0.94	0.91	2.12234			2.12234
P78417	65	K	Glutathione S-transferase omega-1	GSTO1			1.973	0.92	0.94	0.93			2.12151	2.12151
Q9H307	14	K	Pinin	PNN	1.781		1.801	0.86	0.83	0.83	2.07093		2.16988	2.1204	0.0397045
Q9BVI4	232	K	Nucleolar complex protein 4 homolog	NOC4L			1.399	0.69	0.77	0.66			2.1197	2.1197
Q09666	5772	K	Neuroblast differentiation-associated protein AHNAK	AHNAK	2.002	2.238	2.027	0.99	0.98	0.99	2.02222	2.28367	2.04747	2.11779	0.0082201
Q9HD33	134	K	39S ribosomal protein L47, mitochondrial	MRPL47		1.742	2.163	0.88	0.87	0.97		2.0023	2.2299	2.1161	0.0911692
Q9Y3C1	106	K	Nucleolar protein 16	NOP16	1.444	1.453		0.69	0.68	0.72	2.09275	2.13676		2.11476	0.0177678
O75391	67	K	Sperm-associated antigen 7	SPAG7	1.064	1.115	1.16	0.51	0.51	0.56	2.08627	2.18627	2.07143	2.11466	0.00156644
P11388	1141	K	DNA topoisomerase 2-alpha	TOP2A	1.733			0.82	0.79	0.82	2.11341			2.11341
P11388	798	K	DNA topoisomerase 2-alpha	TOP2A	1.725	1.671	1.736	0.82	0.79	0.82	2.10366	2.11519	2.11707	2.11197	2.1328e-05
P05387	94	K	60S acidic ribosomal protein P2	RPLP2		1.962		0.93	0.93	0.97		2.10968		2.10968
P11940	213	K	Polyadenylate-binding protein 1	PABPC1	1.516	2.528		0.94	0.97	0.95	1.61277	2.60619		2.10948	0.359328
P50453	271	K	Serpin B9	SERPINB9			4.701	2.22	2.19	2.23			2.10807	2.10807
P09493	233	K	Tropomyosin alpha-1 chain	TPM1	1.999	1.898	1.849	0.9	0.92	0.91	2.22111	2.06304	2.03187	2.10534	0.00418669
P63151	417	K	Serine/threonine-protein phosphatase 2A 55 kDa regulatory subunit B alpha isoform	PPP2R2A	1.898	2.128	2.824	1.07	1.12	1.07	1.77383	1.9	2.63925	2.10436	0.0791151
Q6PIU2	106	K	Neutral cholesterol ester hydrolase 1	NCEH1	3.35	2.837	2.286	1.31	1.36	1.37	2.55725	2.08603	1.66861	2.10396	0.0723965
P82914	90	K	28S ribosomal protein S15, mitochondrial	MRPS15	1.024	0.946			0.45			2.10222		2.10222
Q9NVH1	476	K	DnaJ homolog subfamily C member 11	DNAJC11		1.301		0.71	0.62	0.62		2.09839		2.09839
Q01813	574	K	ATP-dependent 6-phosphofructokinase, liver type	PFKL			2.265	1.09	1.07	1.08			2.09722	2.09722
P46087	9	K	Probable 28S rRNA (cytosine(4447)-C(5))-methyltransferase	NOP2	1.537		1.585	0.76	0.77	0.73	2.02237		2.17123	2.0968	0.0609116
O60488	429	K	Long-chain-fatty-acid--CoA ligase 4	ACSL4			2.66	1.24	1.27	1.27			2.09449	2.09449
Q92922	882	K	SWI/SNF complex subunit SMARCC1	SMARCC1	1.108			0.53			2.09057			2.09057
Q9NTJ3	202	K	Structural maintenance of chromosomes protein 4	SMC4			1.797	0.83	0.86	0.86			2.08953	2.08953
P20290	67	K	Transcription factor BTF3	BTF3		2.11		0.96	1.01	0.99		2.08911		2.08911
P30533	332	K	Alpha-2-macroglobulin receptor-associated protein	LRPAP1	2.255			1.08	1.19	1.11	2.08796			2.08796
O43242	84	K	26S proteasome non-ATPase regulatory subunit 3	PSMD3	2.211		2.172	1.06	1.05	1.04	2.08585		2.08846	2.08716	0.00108175
Q9NWT1	371	K	p21-activated protein kinase-interacting protein 1	PAK1IP1	1.646	1.887	1.406	0.82	0.83	0.71	2.00732	2.27349	1.98028	2.08703	0.0109295
Q16352	447	K	Alpha-internexin	INA	4.422	5.001	5.898	2.45	2.46	2.45	1.8049	2.03293	2.40735	2.08172	0.037335
P08243	244	K	Asparagine synthetase [glutamine-hydrolyzing]	ASNS	1.574	1.489	1.49	0.72	0.71	0.76	2.18611	2.09718	1.96053	2.08127	0.00547661
Q96A49	98	K	Synapse-associated protein 1	SYAP1	2.408	2.271	3.384	1.28	1.28	1.31	1.88125	1.77422	2.58321	2.07956	0.0737945
Q9BY77	81	K	Polymerase delta-interacting protein 3	POLDIP3	1.62			0.78	0.89	0.81	2.07692			2.07692
P04075	99	K	Fructose-bisphosphate aldolase A	ALDOA	1.181	2.32	2.76	1.01	1	1.01	1.16931	2.32	2.73267	2.07399	0.20168
P78371	248	K	T-complex protein 1 subunit beta	CCT2	2.225	1.682	1.744	0.91	0.9	0.92	2.44505	1.86889	1.89565	2.06987	0.0432235
Q9NR30	595	K	Nucleolar RNA helicase 2	DDX21			1.323	0.66	0.65	0.64			2.06719	2.06719
O95347	481	K	Structural maintenance of chromosomes protein 2	SMC2	1.943			0.94	0.95	0.93	2.06702			2.06702
P29317	956	K	Ephrin type-A receptor 2	EPHA2	1.173	1.18		0.59	0.55	0.58	1.98814	2.14545		2.0668	0.0661452
P06753	141	K	Tropomyosin alpha-3 chain	TPM3	2.387		2.608	1.23	1.31	1.19	1.94065		2.1916	2.06612	0.104997
P30519	24	K	Heme oxygenase 2	HMOX2	1.664		2.67	1.07	1.05	1.04	1.55514		2.56731	2.06122	0.377739
P00374	55	K	Dihydrofolate reductase	DHFR			2.081	1.03	1.08	1.01			2.0604	2.0604
O75347	105	K	Tubulin-specific chaperone A	TBCA		2.328		1.11	1.13	1.12		2.06018		2.06018
P05455	280	K	Lupus La protein	SSB			2.574	1.27	1.24	1.25			2.0592	2.0592
P62424	125	K	60S ribosomal protein L7a	RPL7A	1.775		1.725	0.85	0.85	0.85	2.08824		2.02941	2.05882	0.0249959
O00193	49	K	Small acidic protein	SMAP	1.776	1.846	1.799	0.87	0.88	0.89	2.04138	2.09773	2.02135	2.05348	0.000705822
P40429	197	K	60S ribosomal protein L13a	RPL13A		1.888		0.86	0.92	0.9		2.05217		2.05217
P05387	25	K	60S acidic ribosomal protein P2	RPLP2	1.773	2.105	1.924	0.93	0.93	0.97	1.90645	2.26344	1.98351	2.05113	0.0155976
O43290	757	K	U4/U6.U5 tri-snRNP-associated protein 1	SART1			2.276	1.03	1	1.11			2.05045	2.05045
P36956	333	K	Sterol regulatory element-binding protein 1	SREBF1	4.261	4.759	3.633	2.08			2.04856			2.04856
P26583	127	K	High mobility group protein B2	HMGB2	1.349	1.837	2.231	0.87	0.92	0.86	1.55057	1.99674	2.59419	2.04717	0.105589
O60264	966	K	SWI/SNF-related matrix-associated actin-dependent regulator of chromatin subfamily A member 5	SMARCA5	1.803	1.534	1.845	0.87	0.89	0.79	2.07241	1.7236	2.33544	2.04382	0.0406144
Q6WKZ4	295	K	Rab11 family-interacting protein 1	RAB11FIP1			5.925	2.92	3.21	2.9			2.0431	2.0431
Q92598	234	K	Heat shock protein 105 kDa	HSPH1			1.675	0.82	0.82	0.82			2.04268	2.04268
O15355	339	K	Protein phosphatase 1G	PPM1G	2.613			1.28	1.35	1.34	2.04141			2.04141
P62753	164	K	40S ribosomal protein S6	RPS6		1.692		0.83	0.83	0.85		2.03855		2.03855
Q13137	262	K	Calcium-binding and coiled-coil domain-containing protein 2	CALCOCO2	1.121			0.55	0.5	0.45	2.03818			2.03818
Q09666	5858	K	Neuroblast differentiation-associated protein AHNAK	AHNAK	2.015	1.992	2.014	0.99	0.98	0.99	2.03535	2.03265	2.03434	2.03412	8.70444e-07
P63096	46	K	Guanine nucleotide-binding protein G(i) subunit alpha-2	GNAI2		1.626	1.507	0.73	0.79	0.75		2.05823	2.00933	2.03378	0.0212831
Q14534	451	K	Squalene monooxygenase	SQLE	1.653	2.081	1.894	0.93	0.85	1.01	1.77742	2.44824	1.87525	2.03363	0.0563125
Q99615	375	K	DnaJ homolog subfamily C member 7	DNAJC7			1.464	0.69	0.74	0.72			2.03333	2.03333
P22234	125	K	Multifunctional protein ADE2	PAICS			1.97	0.95	0.99	0.97			2.03093	2.03093
Q15631	187	K	Translin	TSN		1.952	2.319	1.01	1.06	1.05		1.84151	2.20857	2.02504	0.157881
Q9UMY1	131	K	Nucleolar protein 7	NOL7	1.431	1.645	1.297	0.62	0.79	0.77	2.30806	2.08228	1.68442	2.02492	0.044325
P62906	207	K	60S ribosomal protein L10a	RPL10A	1.742	1.469	2.185	0.9	0.89	0.88	1.93556	1.65056	2.48295	2.02302	0.0758917
P82914	100	K	28S ribosomal protein S15, mitochondrial	MRPS15	0.957	0.91	0.883		0.45			2.02222		2.02222
P12236	43	K	ADP/ATP translocase 3	SLC25A6	2.553	2.315	2.429	1.31	1.17	1.14	1.94885	1.97863	2.1307	2.0194	0.00454619
Q9UPN4	300	K	Centrosomal protein of 131 kDa	CEP131	2.643			1.31		1.29	2.01756			2.01756
Q14558	238	K	Phosphoribosyl pyrophosphate synthase-associated protein 1	PRPSAP1	2.217	2.186	1.683	1.01	0.97	1.05	2.19505	2.25361	1.60286	2.01717	0.0573002
Q9UN37	156	K	Vacuolar protein sorting-associated protein 4A	VPS4A	2.519			1.25	1.27	1.17	2.0152			2.0152
P09132	26	K	Signal recognition particle 19 kDa protein	SRP19	1.111	1.971			0.98	0.89		2.01122		2.01122
P36871	234	K	Phosphoglucomutase-1	PGM1		1.93		0.98	0.96	0.98		2.01042		2.01042
P63092	53	K	Guanine nucleotide-binding protein G(s) subunit alpha isoforms short	GNAS	1.397	1.626	1.507	0.74	0.74	0.78	1.88784	2.1973	1.93205	2.00573	0.013566
Q9NTJ3	354	K	Structural maintenance of chromosomes protein 4	SMC4	1.611		1.773	0.83	0.86	0.86	1.94096		2.06163	2.0013	0.0541169
P18206	173	K	Vinculin	VCL			3.339	1.65	1.67	1.67			1.9994	1.9994
O60664	314	K	Perilipin-3	PLIN3	2.639			1.32	1.32	1.33	1.99924			1.99924
Q9BX95	19	K	Sphingosine-1-phosphate phosphatase 1	SGPP1	2.259			1.13	1.72		1.99912			1.99912
O95166	13	K	Gamma-aminobutyric acid receptor-associated protein	GABARAP		1.196	1.2	0.58	0.58	0.62		2.06207	1.93548	1.99878	0.0569011
P02786	60	K	Transferrin receptor protein 1	TFRC	1.31	1.344	1.362	0.67	0.66	0.68	1.95522	2.03636	2.00294	1.99818	0.00083347
Q12874	466	K	Splicing factor 3A subunit 3	SF3A3		1.838		0.95	0.92	0.9		1.99783		1.99783
P49327	1704	K	Fatty acid synthase	FASN	1.81	2.173	1.93	0.98	0.99	0.99	1.84694	2.19495	1.94949	1.99713	0.0157042
P60891	176	K	Ribose-phosphate pyrophosphokinase 1	PRPS1		1.837		0.97	0.92	0.93		1.99674		1.99674
Q6NZI2	299	K	Polymerase I and transcript release factor	PTRF	1.992			1	1.01	0.99	1.992			1.992
Q99832	287	K	T-complex protein 1 subunit eta	CCT7	2.236	1.512	2.035	0.97	0.95	0.98	2.30515	1.59158	2.07653	1.99109	0.0614244
Q14204	3945	K	Cytoplasmic dynein 1 heavy chain 1	DYNC1H1		1.889		0.95	0.95	0.95		1.98842		1.98842
P30040	48	K	Endoplasmic reticulum resident protein 29	ERP29		1.71		0.85	0.86	0.85		1.98837		1.98837
Q15293	263	K	Reticulocalbin-1	RCN1		1.112		0.55	0.56	0.56		1.98571		1.98571
O15305	210	K	Phosphomannomutase 2	PMM2	1.295	3.108	1.679	0.99	1.03	1.03	1.30808	3.01748	1.6301	1.98522	0.264792
P82932	23	K	28S ribosomal protein S6, mitochondrial	MRPS6		1.607		0.9	0.81	0.83		1.98395		1.98395
P46776	119	K	60S ribosomal protein L27a	RPL27A	1.755	1.771	1.968	0.92	0.92	0.93	1.90761	1.925	2.11613	1.98291	0.00685635
P11216	597	K	Glycogen phosphorylase, brain form	PYGB		2.695		1.38	1.36	1.36		1.98162		1.98162
P11021	185	K	78 kDa glucose-regulated protein	HSPA5			2.258	1.15	1.16	1.14			1.9807	1.9807
Q15075	370	K	Early endosome antigen 1	EEA1	2.389		1.458	0.96	0.98	0.99	2.48854		1.47273	1.98063	0.402465
P29692	280	K	Elongation factor 1-delta	EEF1D	2.551		1.352	0.99	0.93	0.98	2.57677		1.37959	1.97818	0.454149
O75533	1030	K	Splicing factor 3B subunit 1	SF3B1	1.859			0.94	0.95	0.94	1.97766			1.97766
Q1ED39	199	K	Lysine-rich nucleolar protein 1	KNOP1	1.305			0.66	0.66	0.69	1.97727			1.97727
P60891	212	K	Ribose-phosphate pyrophosphokinase 2	PRPS2		1.686	1.973	0.97	0.92	0.93		1.83261	2.12151	1.97706	0.131213
O43242	80	K	26S proteasome non-ATPase regulatory subunit 3	PSMD3	2.092			1.06	1.05	1.04	1.97358			1.97358
Q99615	390	K	DnaJ homolog subfamily C member 7	DNAJC7		1.459		0.69	0.74	0.72		1.97162		1.97162
Q9Y6G9	428	K	Cytoplasmic dynein 1 light intermediate chain 1	DYNC1LI1	1.794			0.91	0.92	0.91	1.97143			1.97143
Q9P2J5	1154	K	Leucine--tRNA ligase, cytoplasmic	LARS	2.063		0.998	0.78	0.78	0.77	2.64487		1.2961	1.97049	0.494454
P52948	594	K	Nuclear pore complex protein Nup98-Nup96	NUP98	2.172	1.927		1.05	1.03	1.04	2.06857	1.87087		1.96972	0.091146
Q8TC12	105	K	Retinol dehydrogenase 11	RDH11	0.965			0.49	0.5	0.49	1.96939			1.96939
P11387	439	K	DNA topoisomerase 1	TOP1			1.71	0.86	0.92	0.87			1.96552	1.96552
Q13813	2088	K	Spectrin alpha chain, non-erythrocytic 1	SPTAN1	2.16			1.1	1.1	1.1	1.96364			1.96364
P61758	70	K	Prefoldin subunit 3	VBP1	2.211	1.461		0.92	0.96	0.9	2.40326	1.52188		1.96257	0.365798
P62280	20	K	40S ribosomal protein S11	RPS11	1.7	1.661	1.7	0.87	0.84	0.87	1.95402	1.97738	1.95402	1.96181	9.82827e-05
P14174	78	K	Macrophage migration inhibitory factor	MIF	1.274		1.695	0.74	0.77	0.77	1.72162		2.2013	1.96146	0.215909
Q92667	189	K	A-kinase anchor protein 1, mitochondrial	AKAP1	1.196			0.61	0.79	0.95	1.96066			1.96066
Q9NR30	670	K	Nucleolar RNA helicase 2	DDX21	1.354		1.196	0.66	0.65	0.64	2.05152		1.86875	1.96013	0.0851775
Q96GK7	120	K	Fumarylacetoacetate hydrolase domain-containing protein 2A	FAHD2A		1.411		0.73	0.72	0.75		1.95972		1.95972
Q08945	609	K	FACT complex subunit SSRP1	SSRP1	2.144	1.623		0.97	0.95	1.02	2.21031	1.70842		1.95937	0.225561
P62273	48	K	40S ribosomal protein S29	RPS29	1.265		1.701	0.73	0.75	0.78	1.73288		2.18077	1.95682	0.203495
Q02790	234	K	Peptidyl-prolyl cis-trans isomerase FKBP4	FKBP4	1.741			0.89	0.9	0.84	1.95618			1.95618
Q15691	220	K	Microtubule-associated protein RP/EB family member 2	MAPRE2	1.988	2.334	2.048	1.1	1.09	1.07	1.80727	2.14128	1.91402	1.95419	0.0156081
P49755	140	K	Transmembrane emp24 domain-containing protein 10	TMED10	1.797			0.92	0.91	0.89	1.95326			1.95326
Q9NUQ3	162	K	Gamma-taxilin	TXLNG			1.582	0.95	0.94	0.81			1.95309	1.95309
Q9Y4W6	725	K	AFG3-like protein 2	AFG3L2			1.972	1.07	1.07	1.01			1.95248	1.95248
Q9Y617	33	K	Phosphoserine aminotransferase	PSAT1		1.229		0.66	0.63	0.64		1.95079		1.95079
Q9UQE7	997	K	Structural maintenance of chromosomes protein 3	SMC3			2.165	1.08	1.07	1.11			1.95045	1.95045
P07602	303	K	Prosaposin	PSAP	1.977	2.245	2.26	1.09	1.07	1.17	1.81376	2.09813	1.93162	1.94784	0.0111711
Q01813	747	K	ATP-dependent 6-phosphofructokinase, platelet type	PFKP	2.062		2.162	1.09	1.07	1.08	1.89174		2.00185	1.9468	0.052234
P11388	529	K	DNA topoisomerase 2-alpha	TOP2A	1.858	1.443	1.432	0.82	0.79	0.82	2.26585	1.82658	1.74634	1.94626	0.0410079
P49588	650	K	Alanine--tRNA ligase, cytoplasmic	AARS	1.791		1.356	0.8	0.81	0.82	2.23875		1.65366	1.9462	0.262412
P39019	111	K	40S ribosomal protein S19	RPS19			1.77	0.92	0.92	0.91			1.94505	1.94505
P11021	474	K	78 kDa glucose-regulated protein	HSPA5	2.263	2.406	2.044	1.15	1.16	1.14	1.96783	2.07414	1.79298	1.94498	0.0110968
P68104	219	K	Elongation factor 1-alpha 1	EEF1A1	1.707	1.884	1.716	0.92	0.9	0.91	1.85543	2.09333	1.88571	1.94483	0.0092624
P61353	9	K	60S ribosomal protein L27	RPL27			1.573	0.84	0.81	0.81			1.94198	1.94198
O43159	90	K	Ribosomal RNA-processing protein 8	RRP8	1.664	1.845		0.92	0.89	0.91	1.8087	2.07303		1.94086	0.124847
P13639	314	K	Elongation factor 2	EEF2	2.041		2.264	1.12	1.12	1.1	1.82232		2.05818	1.94025	0.111759
Q9Y3B9	156	K	RRP15-like protein	RRP15	1.336	1.283		0.68	0.67	0.61	1.96471	1.91493		1.93982	0.023833
P07814	963	K	Bifunctional glutamate/proline--tRNA ligase	EPRS	1.848	2.111		1.01	1.03	1.01	1.8297	2.04951		1.93961	0.104365
P39019	7	K	40S ribosomal protein S19	RPS19	1.784	1.818	1.729	0.92	0.92	0.91	1.93913	1.97609	1.9	1.93841	0.000820979
Q8TDD1	532	K	ATP-dependent RNA helicase DDX54	DDX54			0.969	0.51	0.53	0.5			1.938	1.938
P25685	181	K	DnaJ homolog subfamily B member 1	DNAJB1	4.552	3.671	3.068	1.91	1.98	1.95	2.38325	1.85404	1.57333	1.93687	0.0843383
Q9H6U8	26	K	Alpha-1,2-mannosyltransferase ALG9	ALG9		1.721			0.89			1.93371		1.93371
O00193	13	K	Small acidic protein	SMAP			1.721	0.87	0.88	0.89			1.93371	1.93371
P11766	226	K	Alcohol dehydrogenase class-3	ADH5		1.991		1.09	1.03	1.04		1.93301		1.93301
P02786	128	K	Transferrin receptor protein 1	TFRC	1.235	1.314	1.331	0.67	0.66	0.68	1.84328	1.99091	1.95735	1.93052	0.00344031
P00338	243	K	L-lactate dehydrogenase A chain	LDHA	1.866	2.255	1.726	1.01	1.01	1.01	1.84752	2.23267	1.70891	1.9297	0.0400599
P26373	135	K	60S ribosomal protein L13	RPL13		1.577	1.643	0.85	0.84	0.83		1.87738	1.97952	1.92845	0.0494216
Q96HE7	67	K	ERO1-like protein alpha	ERO1L			1.465	0.79	0.74	0.76			1.92763	1.92763
P40926	324	K	Malate dehydrogenase, mitochondrial	MDH2		1.85		0.98	0.96	0.99		1.92708		1.92708
O75683	7	K	Surfeit locus protein 6	SURF6		1.232	1.214	0.66	0.65	0.62		1.89538	1.95806	1.92672	0.0304237
P13639	322	K	Elongation factor 2	EEF2	2.373	1.65	2.406	1.12	1.12	1.1	2.11875	1.47321	2.18727	1.92641	0.0797579
Q9Y5J1	395	K	U3 small nucleolar RNA-associated protein 18 homolog	UTP18	1.315	1.067	1.412	0.68	0.64	0.65	1.93382	1.66719	2.17231	1.92444	0.0353876
Q8NC51	91	K	Plasminogen activator inhibitor 1 RNA-binding protein	SERBP1	2.032	1.887	1.963	1.02	1.02	1.02	1.99216	1.85	1.92451	1.92222	0.00295924
P53396	616	K	ATP-citrate synthase	ACLY		1.806		0.95	0.94	0.95		1.92128		1.92128
Q9H307	293	K	Pinin	PNN			1.594	0.86	0.83	0.83			1.92048	1.92048
P16435	279	K	NADPH--cytochrome P450 reductase	POR	2.439			1.27	1.31	1.29	1.92047			1.92047
P11388	662	K	DNA topoisomerase 2-alpha	TOP2A	1.736		1.41	0.82	0.79	0.82	2.11707		1.71951	1.91829	0.189122
Q14203	453	K	Dynactin subunit 1	DCTN1	1.668			0.87	0.89	0.89	1.91724			1.91724
Q09666	4898	K	Neuroblast differentiation-associated protein AHNAK	AHNAK	1.897			0.99	0.98	0.99	1.91616			1.91616
Q9Y265	445	K	RuvB-like 1	RUVBL1		1.935		1	1.01	1.01		1.91584		1.91584
Q02127	99	K	Dihydroorotate dehydrogenase (quinone), mitochondrial	DHODH			1.724	1		0.9			1.91556	1.91556
Q96B97	659	K	SH3 domain-containing kinase-binding protein 1	SH3KBP1	1.421		1.45	0.76	0.71	0.74	1.86974		1.95946	1.9146	0.0440902
P27824	210	K	Calnexin	CANX	1.818			0.95	0.94	0.92	1.91368			1.91368
Q6DD88	391	K	Atlastin-3	ATL3	1.301			0.68	0.7	0.7	1.91324			1.91324
P22087	318	K	rRNA 2'-O-methyltransferase fibrillarin	FBL			1.492	0.78	0.78	0.78			1.91282	1.91282
P31689	344	K	DnaJ homolog subfamily A member 1	DNAJA1	1.797	1.47	2.493	1	1	1.01	1.797	1.47	2.46832	1.91177	0.126828
P37802	78	K	Transgelin-2	TAGLN2	3.903		1.893	1.51	1.52	1.53	2.58477		1.23725	1.91101	0.514283
P16989	96	K	Y-box-binding protein 3	YBX3	1.157	1.313	1.179	0.64	0.64	0.63	1.80781	2.05156	1.87143	1.91027	0.0095085
P62495	249	K	Eukaryotic peptide chain release factor subunit 1	ETF1		1.767	2.053	1.04	1	1		1.767	2.053	1.91	0.139216
O95347	1012	K	Structural maintenance of chromosomes protein 2	SMC2		1.768	1.821	0.94	0.95	0.93		1.86105	1.95806	1.90956	0.0479223
P35237	141	K	Serpin B6	SERPINB6	1.386	1.478		0.75	0.75	0.76	1.848	1.97067		1.90933	0.060542
O60488	54	K	Long-chain-fatty-acid--CoA ligase 4	ACSL4	2.359	2.206	2.638	1.24	1.27	1.27	1.90242	1.73701	2.07717	1.90553	0.0171894
Q96RP9	745	K	Elongation factor G, mitochondrial	GFM1	1.787		2.747	1.24	1.27	1.16	1.44113		2.3681	1.90462	0.399183
Q01813	625	K	ATP-dependent 6-phosphofructokinase, platelet type	PFKP	1.501		2.626	1.09	1.07	1.08	1.37706		2.43148	1.90427	0.438956
Q8NEY8	191	K	Periphilin-1	PPHLN1			1.713	1.14	0.92	0.9			1.90333	1.90333
Q9NTJ3	607	K	Structural maintenance of chromosomes protein 4	SMC4	1.581	1.646	1.626	0.83	0.86	0.86	1.90482	1.91395	1.8907	1.90316	8.41394e-05
P62249	4	K	40S ribosomal protein S16	RPS16		1.76	1.654	0.9	0.87	0.93		2.02299	1.77849	1.90074	0.120721
Q10713	478	K	Mitochondrial-processing peptidase subunit alpha	PMPCA	1.49	1.66	2.224	0.95	0.94	0.94	1.56842	1.76596	2.36596	1.90011	0.0920068
O60884	62	K	DnaJ homolog subfamily A member 2	DNAJA2		1.9		1.03	1	1.07		1.9		1.9
P15880	65	K	40S ribosomal protein S2	RPS2	1.846	1.708	1.565	0.89	0.89	0.92	2.07416	1.9191	1.70109	1.89812	0.0210873
Q9Y266	68	K	Nuclear migration protein nudC	NUDC	2.001	1.717		0.98	0.98	0.98	2.04184	1.75204		1.89694	0.14299
Q9NR30	285	K	Nucleolar RNA helicase 2	DDX21	1.259	1.244	1.194	0.66	0.65	0.64	1.90758	1.91385	1.86562	1.89568	0.000428153
Q13428	74	K	Treacle protein	TCOF1	1.442	1.325		0.73	0.73	0.74	1.97534	1.81507		1.89521	0.080168
P61254	36	K	60S ribosomal protein L26	RPL26		1.534			0.81	0.81		1.89383		1.89383
Q9H501	45	K	ESF1 homolog	ESF1	1.575	1.596	1.734	0.84	0.87	0.88	1.875	1.83448	1.97045	1.89331	0.00303969
Q92598	739	K	Heat shock protein 105 kDa	HSPH1		1.551		0.82	0.82	0.82		1.89146		1.89146
Q96KR1	521	K	Zinc finger RNA-binding protein	ZFR		1.588		0.87	0.84	0.87		1.89048		1.89048
Q9NQC3	1058	K	Reticulon-4	RTN4	1.653	1.63	1.63	0.88	0.85	0.87	1.87841	1.91765	1.87356	1.88987	0.000368803
P27816	780	K	Microtubule-associated protein 4	MAP4			2.041	1.06	1.05	1.08			1.88981	1.88981
Q96BK5	294	K	PIN2/TERF1-interacting telomerase inhibitor 1	PINX1		1.983			1.05	1.18		1.88857		1.88857
P63096	277	K	Guanine nucleotide-binding protein G(k) subunit alpha	GNAI3	1.51	1.358	1.406	0.73	0.79	0.75	2.06849	1.71899	1.87467	1.88738	0.0189172
P52565	43	K	Rho GDP-dissociation inhibitor 1	ARHGDIA		2		1.11	1.06	1.07		1.88679		1.88679
P62753	119	K	40S ribosomal protein S6	RPS6	1.74	1.396	1.597	0.83	0.83	0.85	2.09639	1.68193	1.87882	1.88571	0.0263168
P30622	1102	K	CAP-Gly domain-containing linker protein 1	CLIP1		1.117	1.221	0.58	0.6	0.64		1.86167	1.90781	1.88474	0.0234685
P49773	57	K	Histidine triad nucleotide-binding protein 1	HINT1		1.771		0.91	0.94	0.94		1.88404		1.88404
Q9H583	1634	K	HEAT repeat-containing protein 1	HEATR1	1.49		1.393	0.78	0.74	0.75	1.91026		1.85733	1.88379	0.0269401
Q07157	702	K	Tight junction protein ZO-1	TJP1	2.674	1.378		1.08	1.07	1.05	2.47593	1.28785		1.88189	0.484552
P12814	220	K	Alpha-actinin-1	ACTN1	1.712			0.91	0.91	0.92	1.88132			1.88132
P62753	230	K	40S ribosomal protein S6	RPS6	1.572	1.576	1.573	0.83	0.83	0.85	1.89398	1.8988	1.85059	1.88112	0.000453686
P04899	313	K	Guanine nucleotide-binding protein G(i) subunit alpha-2	GNAI2	2.547		2.506	1.16	1.15	1.6	2.19569		1.56625	1.88097	0.297819
Q13206	433	K	Probable ATP-dependent RNA helicase DDX10	DDX10	1.879			1	0.97	0.93	1.879			1.879
P07602	152	K	Prosaposin	PSAP		1.767	2.463	1.09	1.07	1.17		1.6514	2.10513	1.87827	0.222971
P02786	240	K	Transferrin receptor protein 1	TFRC	1.29	1.217	1.266	0.67	0.66	0.68	1.92537	1.84394	1.86176	1.87703	0.00118911
Q53EU6	293	K	Glycerol-3-phosphate acyltransferase 3	AGPAT9	1.219	1.282		0.71	0.63	0.67	1.7169	2.03492		1.87591	0.159985
P02786	189	K	Transferrin receptor protein 1	TFRC	1.313		1.218	0.67	0.66	0.68	1.9597		1.79118	1.87544	0.0861277
Q13177	62	K	Serine/threonine-protein kinase PAK 2	PAK2			1.817	0.99	0.97	0.97			1.8732	1.8732
Q00839	664	K	Heterogeneous nuclear ribonucleoprotein U	HNRNPU		1.722		0.93	0.92	0.93		1.87174		1.87174
Q96AX1	429	K	Vacuolar protein sorting-associated protein 33A	VPS33A	1.853			0.99	0.79	1.14	1.87172			1.87172
Q96A49	70	K	Synapse-associated protein 1	SYAP1		2.395		1.28	1.28	1.31		1.87109		1.87109
Q99832	55	K	T-complex protein 1 subunit eta	CCT7	1.873	1.627	1.927	0.97	0.95	0.98	1.93093	1.71263	1.96633	1.86996	0.0122431
P54577	484	K	Tyrosine--tRNA ligase, cytoplasmic	YARS			1.72	0.91	0.94	0.92			1.86957	1.86957
Q9H6F5	261	K	Coiled-coil domain-containing protein 86	CCDC86	1.205		1.337	0.68	0.68	0.68	1.77206		1.96618	1.86912	0.0997193
P68104	244	K	Elongation factor 1-alpha 1	EEF1A1	1.724	1.674	1.698	0.92	0.9	0.91	1.87391	1.86	1.86593	1.86662	3.24486e-05
Q9BXJ9	646	K	N-alpha-acetyltransferase 15, NatA auxiliary subunit	NAA15			1.754	0.98	0.95	0.94			1.86596	1.86596
P27816	847	K	Microtubule-associated protein 4	MAP4	2.132	1.799	2.023	1.06	1.05	1.08	2.01132	1.71333	1.87315	1.86593	0.0145067
Q99439	194	K	Calponin-2	CNN2	3.493	2.183		1.51	1.54	1.49	2.31325	1.41753		1.86539	0.40222
P07900	84	K	Heat shock protein HSP 90-alpha	HSP90AA1	2.522	2.133	2.21	1.2	1.28	1.21	2.10167	1.66641	1.82645	1.86484	0.0309067
P30622	1280	K	CAP-Gly domain-containing linker protein 1	CLIP1	1.081			0.58	0.6	0.64	1.86379			1.86379
Q14566	365	K	DNA replication licensing factor MCM6	MCM6		1.565		0.82	0.84	0.82		1.8631		1.8631
P12004	248	K	Proliferating cell nuclear antigen	PCNA	1.746	1.994	1.906	1	1.01	1.02	1.746	1.97426	1.86863	1.86296	0.00864802
O43399	78	K	Tumor protein D54	TPD52L2	1.647	1.698	1.777	0.91	0.92	0.92	1.80989	1.84565	1.93152	1.86235	0.00261711
P61019	53	K	Ras-related protein Rab-2A	RAB2A		1.438	1.761	0.88	0.87	0.85		1.65287	2.07176	1.86232	0.210636
Q9H3N1	233	K	Thioredoxin-related transmembrane protein 1	TMX1	1.713			0.92	0.86	0.94	1.86196			1.86196
P62917	181	K	60S ribosomal protein L8	RPL8			1.582	0.84	0.86	0.85			1.86118	1.86118
Q9P2R3	32	K	Ankyrin repeat and FYVE domain-containing protein 1	ANKFY1		1.898		1.05	1.02	1.06		1.86078		1.86078
O60264	496	K	SWI/SNF-related matrix-associated actin-dependent regulator of chromatin subfamily A member 5	SMARCA5	1.002		2.029	0.87	0.89	0.79	1.15172		2.56835	1.86004	0.54835
Q14690	1843	K	Protein RRP5 homolog	PDCD11	1.653			0.89	0.85	0.8	1.8573			1.8573
Q8NHQ9	583	K	ATP-dependent RNA helicase DDX55	DDX55		1.651			0.89	0.85		1.85506		1.85506
P82914	145	K	28S ribosomal protein S15, mitochondrial	MRPS15		0.834	0.825		0.45			1.85333		1.85333
P18124	77	K	60S ribosomal protein L7	RPL7	1.702			0.92	0.92	0.91	1.85			1.85
Q9BXJ9	425	K	N-alpha-acetyltransferase 15, NatA auxiliary subunit	NAA15		1.615	1.878	0.98	0.95	0.94		1.7	1.99787	1.84894	0.154824
Q9BUL8	111	K	Programmed cell death protein 10	PDCD10		2.015		1.21	1.09	1.01		1.84862		1.84862
Q8TCC3	83	K	39S ribosomal protein L30, mitochondrial	MRPL30	1.645			0.89	0.97	0.87	1.84831			1.84831
P12236	147	K	ADP/ATP translocase 3	SLC25A6	2.307	2.377	1.997	1.31	1.17	1.14	1.76107	2.03162	1.75175	1.84815	0.017114
O00560	119	K	Syntenin-1	SDCBP	1.933	1.78	1.811	0.99	1	1	1.95253	1.78	1.811	1.84784	0.00583255
P54709	220	K	Sodium/potassium-transporting ATPase subunit beta-3	ATP1B3	1.697	1.553		0.89	0.87	0.9	1.90674	1.78506		1.8459	0.0645341
Q14978	76	K	Nucleolar and coiled-body phosphoprotein 1	NOLC1	1.944	1.883	1.941	1	1.04	1.09	1.944	1.81058	1.78073	1.8451	0.00524962
P07199	96	K	Major centromere autoantigen B	CENPB	1.353	1.394		0.72	0.77	0.73	1.87917	1.81039		1.84478	0.0366089
Q9UPN4	641	K	Centrosomal protein of 131 kDa	CEP131	2.571		2.225	1.31		1.29	1.9626		1.72481	1.8437	0.125232
Q9H3U1	104	K	Protein unc-45 homolog A	UNC45A	2.566	2.262	1.981	1.23	1.22	1.25	2.08618	1.8541	1.5848	1.84169	0.0416775
P16989	124	K	Y-box-binding protein 3	YBX3	1.196	1.143	1.177	0.64	0.64	0.63	1.86875	1.78594	1.86825	1.84098	0.00160262
P33176	150	K	Kinesin-1 heavy chain	KIF5B	2.006			1.09	1.08	1.07	1.84037			1.84037
P84098	190	K	60S ribosomal protein L19	RPL19	1.406	1.436	1.639	0.82	0.82	0.8	1.71463	1.75122	2.04875	1.8382	0.0230755
P12236	105	K	ADP/ATP translocase 3	SLC25A6	2.254	2.058	2.319	1.31	1.17	1.14	1.72061	1.75897	2.03421	1.83793	0.0202085
Q8WTT2	628	K	Nucleolar complex protein 3 homolog	NOC3L	1.415			0.77	0.8	0.79	1.83766			1.83766
P19338	79	K	Nucleolin	NCL	1.317	1.306	1.27	0.71	0.71	0.7	1.85493	1.83944	1.81429	1.83622	0.000300721
Q9UHD8	490	K	Septin-9	SEPT9		2.387		1.32	1.3	1.34		1.83615		1.83615
P84098	153	K	60S ribosomal protein L19	RPL19	1.353	1.405	1.714	0.82	0.82	0.8	1.65	1.71341	2.1425	1.8353	0.0477826
O14684	42	K	Prostaglandin E synthase	PTGES	1.67			0.91	0.91	0.9	1.83516			1.83516
P50990	539	K	T-complex protein 1 subunit theta	CCT8	1.805	1.919	1.853	1.02	1	1.02	1.76961	1.919	1.81667	1.83509	0.00415683
P84098	144	K	60S ribosomal protein L19	RPL19	1.528	1.498	1.448	0.82	0.82	0.8	1.86341	1.82683	1.81	1.83341	0.000536444
O00186	213	K	Syntaxin-binding protein 3	STXBP3			1.21	0.56	0.65	0.66			1.83333	1.83333
Q9GZR2	341	K	RNA exonuclease 4	REXO4	1.422	2.032	1.99	0.87	1		1.63448	2.032		1.83324	0.207127
P49327	235	K	Fatty acid synthase	FASN	1.771	1.857	1.798	0.98	0.99	0.99	1.80714	1.87576	1.81616	1.83302	0.00100017
Q9BWD1	180	K	Acetyl-CoA acetyltransferase, cytosolic	ACAT2	1.468	1.463		0.79	0.81	0.8	1.85823	1.80617		1.8322	0.0281395
Q9NR30	332	K	Nucleolar RNA helicase 2	DDX21	1.153	1.22	1.195	0.66	0.65	0.64	1.74697	1.87692	1.86719	1.83036	0.00377774
Q8TCT9	284	K	Minor histocompatibility antigen H13	HM13	2.284	2.306	2.038	1.24	1.22	1.16	1.84194	1.89016	1.7569	1.82967	0.00329087
Q9NW64	286	K	Pre-mRNA-splicing factor RBM22	RBM22		1.189		0.71	0.65	0.59		1.82923		1.82923
Q4KMQ2	120	K	Anoctamin-6	ANO6			1.626	0.95	0.69	0.89			1.82697	1.82697
P26641	285	K	Elongation factor 1-gamma	EEF1G	1.717			0.94	0.95	0.96	1.8266			1.8266
Q14008	484	K	Cytoskeleton-associated protein 5	CKAP5	1.954			1.07	1.09	1.14	1.82617			1.82617
P39023	393	K	60S ribosomal protein L3	RPL3	1.638	1.708	1.58	0.92	0.9	0.88	1.78043	1.89778	1.79545	1.82456	0.00298522
Q15084	208	K	Protein disulfide-isomerase A6	PDIA6	1.7	1.843	1.73	0.95	0.97	0.97	1.78947	1.9	1.78351	1.82433	0.00315185
P50990	16	K	T-complex protein 1 subunit theta	CCT8	1.86			1.02	1	1.02	1.82353			1.82353
P16615	541	K	Sarcoplasmic/endoplasmic reticulum calcium ATPase 2	ATP2A2		2.024		1.12	1.11	1.11		1.82342		1.82342
Q14344	363	K	Guanine nucleotide-binding protein subunit alpha-13	GNA13			1.258	0.66	0.72	0.69			1.82319	1.82319
P62841	65	K	40S ribosomal protein S15	RPS15	1.717	1.845	1.973	1.04	0.99	1.01	1.65096	1.86364	1.95347	1.82269	0.0173665
P36578	274	K	60S ribosomal protein L4	RPL4		1.621		0.87	0.89	0.89		1.82135		1.82135
Q9NX58	360	K	Cell growth-regulating nucleolar protein	LYAR	1.423	1.846	1.872	1.01	0.97	0.87	1.40891	1.90309	2.15172	1.82124	0.0916519
P06748	150	K	Nucleophosmin	NPM1	1.434	1.507	1.444	0.8	0.8	0.81	1.7925	1.88375	1.78272	1.81966	0.00230287
P07900	489	K	Heat shock protein HSP 90-alpha	HSP90AA1	2.235	2.022	2.437	1.2	1.28	1.21	1.8625	1.57969	2.01405	1.81875	0.0343932
Q9NZ32	221	K	Actin-related protein 10	ACTR10	1.139	1.046	1.468		0.88	0.6		1.18864	2.44667	1.81765	0.526799
P49327	1847	K	Fatty acid synthase	FASN	1.878	1.932	1.567	0.98	0.99	0.99	1.91633	1.95152	1.58283	1.81689	0.0296463
Q15370	55	K	Transcription elongation factor B polypeptide 2	TCEB2	1.324	1.937	2.762	1.06	1.12	1.12	1.24906	1.72946	2.46607	1.81486	0.200866
P02786	665	K	Transferrin receptor protein 1	TFRC	1.231	1.121	1.297	0.67	0.66	0.68	1.83731	1.69848	1.90735	1.81438	0.00841228
O60287	2141	K	Nucleolar pre-ribosomal-associated protein 1	URB1	1.397			0.77	0.71	0.86	1.81429			1.81429
P18621	167	K	60S ribosomal protein L17	RPL17	1.567	1.659	1.6	0.88	0.89	0.89	1.78068	1.86404	1.79775	1.81416	0.00145959
P02786	486	K	Transferrin receptor protein 1	TFRC	1.309	1.105		0.67	0.66	0.68	1.95373	1.67424		1.81399	0.151631
P12270	1006	K	Nucleoprotein TPR	TPR			1.832	1.03	1.04	1.01			1.81386	1.81386
O15498	186	K	Synaptobrevin homolog YKT6	YKT6	2.715	2.574	2.283	1.42	1.34	1.42	1.91197	1.9209	1.60775	1.81354	0.023179
Q15042	805	K	Rab3 GTPase-activating protein catalytic subunit	RAB3GAP1		1.486		0.77	0.82	0.73		1.8122		1.8122
P62847	83	K	40S ribosomal protein S24	RPS24	1.753	1.819	1.278	0.9	0.88	0.9	1.94778	2.06705	1.42	1.81161	0.0794292
Q9UKD2	94	K	mRNA turnover protein 4 homolog	MRTO4		1.304		0.71	0.72	0.72		1.81111		1.81111
P49327	1072	K	Fatty acid synthase	FASN		1.995	1.591	0.98	0.99	0.99		2.01515	1.60707	1.81111	0.217592
P20042	124	K	Eukaryotic translation initiation factor 2 subunit 2	EIF2S2		1.894	1.232	0.88	0.86	0.87		2.20233	1.41609	1.80921	0.383225
Q15075	717	K	Early endosome antigen 1	EEA1	1.736			0.96	0.98	0.99	1.80833			1.80833
P78347	192	K	General transcription factor II-I	GTF2I		0.868		0.47	0.48	0.49		1.80833		1.80833
Q14204	2033	K	Cytoplasmic dynein 1 heavy chain 1	DYNC1H1			1.717	0.95	0.95	0.95			1.80737	1.80737
P15880	108	K	40S ribosomal protein S2	RPS2		1.615	1.654	0.89	0.89	0.92		1.81461	1.79783	1.80622	0.00936895
O15144	136	K	Actin-related protein 2/3 complex subunit 2	ARPC2			1.77	0.96	0.99	0.98			1.80612	1.80612
P62851	66	K	40S ribosomal protein S25	RPS25	1.446	1.732		0.88	0.88	0.89	1.64318	1.96818		1.80568	0.17689
Q01813	139	K	ATP-dependent 6-phosphofructokinase, platelet type	PFKP		1.838	2.042	1.09	1.07	1.08		1.71776	1.89074	1.80425	0.096087
Q02878	87	K	60S ribosomal protein L6	RPL6	1.484	1.47	1.448	0.82	0.81	0.81	1.80976	1.81481	1.78765	1.80408	0.000161304
Q9H3N1	222	K	Thioredoxin-related transmembrane protein 1	TMX1	1.59	1.606	1.706	0.92	0.86	0.94	1.72826	1.86744	1.81489	1.80353	0.00380344
Q9NR30	402	K	Nucleolar RNA helicase 2	DDX21	1.144	1.211	1.157	0.66	0.65	0.64	1.73333	1.86308	1.80781	1.80141	0.00328394
Q9BQE3	112	K	Tubulin alpha-1B chain	TUBA1B	1.98			1.1	1.08	1.09	1.8			1.8
P61247	34	K	40S ribosomal protein S3a	RPS3A	1.819	1.49	1.653	0.91	0.93	0.92	1.9989	1.60215	1.79674	1.79926	0.0294507
O60841	921	K	Eukaryotic translation initiation factor 5B	EIF5B	2.015			1.12	1.17	1.16	1.79911			1.79911
P18669	251	K	Phosphoglycerate mutase 1	PGAM1		1.943		1.06	1.08	1.04		1.79907		1.79907
O75534	434	K	Cold shock domain-containing protein E1	CSDE1			1.187	0.62	0.65	0.66			1.79848	1.79848
Q8NC51	102	K	Plasminogen activator inhibitor 1 RNA-binding protein	SERBP1	1.827	1.84	1.836	1.02	1.02	1.02	1.79118	1.80392	1.8	1.79837	3.34252e-05
Q8IVF2	1408	K	Protein AHNAK2	AHNAK2	1.58		1.71	0.91	0.92	0.92	1.73626		1.8587	1.79748	0.0688403
P49790	227	K	Nuclear pore complex protein Nup153	NUP153	1.216	1.341	1.267	0.71	0.69	0.73	1.71268	1.94348	1.73562	1.79726	0.01248
Q96B97	531	K	SH3 domain-containing kinase-binding protein 1	SH3KBP1		1.276		0.76	0.71	0.74		1.79718		1.79718
Q9GZR7	230	K	ATP-dependent RNA helicase DDX24	DDX24	1.428	1.439	1.781	0.86	0.88	0.85	1.66047	1.63523	2.09529	1.797	0.0488322
Q9Y266	314	K	Nuclear migration protein nudC	NUDC		1.794	1.726	0.98	0.98	0.98		1.83061	1.76122	1.79592	0.039195
P46779	127	K	60S ribosomal protein L28	RPL28	1.419	1.566	1.461	0.85	0.8	0.83	1.66941	1.9575	1.76024	1.79572	0.0167023
P04899	51	K	Guanine nucleotide-binding protein G(i) subunit alpha-2	GNAI2	2.083			1.16	1.15	1.6	1.79569			1.79569
P42766	103	K	60S ribosomal protein L35	RPL35	1.473	1.376	1.349	0.79	0.81	0.74	1.86456	1.69877	1.82297	1.79543	0.00582857
P46087	41	K	Probable 28S rRNA (cytosine(4447)-C(5))-methyltransferase	NOP2	1.344	1.261	1.441	0.76	0.77	0.73	1.76842	1.63766	1.97397	1.79335	0.0220794
Q9NQ55	178	K	Suppressor of SWI4 1 homolog	PPAN	1.056	1.111	1.123	0.65	0.59	0.6	1.62462	1.88305	1.87167	1.79311	0.016532
O60488	426	K	Long-chain-fatty-acid--CoA ligase 4	ACSL4	2.213	2.162	2.4	1.24	1.27	1.27	1.78468	1.70236	1.88976	1.79227	0.00695497
Q6DD88	34	K	Atlastin-3	ATL3		1.254		0.68	0.7	0.7		1.79143		1.79143
P30519	59	K	Heme oxygenase 2	HMOX2		1.881		1.07	1.05	1.04		1.79143		1.79143
Q01469	17	K	Fatty acid-binding protein, epidermal	FABP5	1.307	1.163	1.273	0.7	0.7	0.69	1.86714	1.66143	1.84493	1.79117	0.0100295
Q15181	221	K	Inorganic pyrophosphatase	PPA1	2.613			1.46	1.43	1.47	1.78973			1.78973
Q00839	551	K	Heterogeneous nuclear ribonucleoprotein U	HNRNPU	1.766		1.562	0.93	0.92	0.93	1.89892		1.67957	1.78925	0.123538
O60841	449	K	Eukaryotic translation initiation factor 5B	EIF5B		2.093		1.12	1.17	1.16		1.78889		1.78889
Q15155	170	K	Nodal modulator 1	NOMO1	1.932			1.08	1.11	1.04	1.78889			1.78889
P49327	2391	K	Fatty acid synthase	FASN	1.729	1.792		0.98	0.99	0.99	1.76429	1.8101		1.78719	0.0261848
Q969Q0	30	K	60S ribosomal protein L36a-like	RPL36AL	1.445	1.619	1.421	0.85	0.84	0.82	1.7	1.92738	1.73293	1.78677	0.0119781
Q9BTC0	626	K	Death-inducer obliterator 1	DIDO1	0.871	1.711		0.71	0.73	0.72	1.22676	2.34384		1.7853	0.501856
P21281	81	K	V-type proton ATPase subunit B, brain isoform	ATP6V1B2		2.535		1.44	1.42	1.38		1.78521		1.78521
P62851	20	K	40S ribosomal protein S25	RPS25	1.641	1.543	1.545	0.88	0.88	0.89	1.86477	1.75341	1.73596	1.78471	0.00394184
Q12797	370	K	Aspartyl/asparaginyl beta-hydroxylase	ASPH	1.534			0.86	0.86	0.89	1.78372			1.78372
P23381	114	K	Tryptophan--tRNA ligase, cytoplasmic	WARS	1.943			1.09	1.12	1.12	1.78257			1.78257
P11388	1151	K	DNA topoisomerase 2-alpha	TOP2A	1.407	1.39	1.535	0.82	0.79	0.82	1.71585	1.75949	1.87195	1.78243	0.00525577
O76021	109	K	Ribosomal L1 domain-containing protein 1	RSL1D1		1.378	1.113	0.7	0.69	0.71		1.9971	1.56761	1.78235	0.235728
Q14739	594	K	Lamin-B receptor	LBR	1.55			0.87	1.06	0.99	1.78161			1.78161
P26373	174	K	60S ribosomal protein L13	RPL13	1.524	1.46	1.504	0.85	0.84	0.83	1.79294	1.7381	1.81205	1.78103	0.00120576
Q9Y6K9	129	K	NF-kappa-B essential modulator	IKBKG	1.656			0.93	0.94	0.94	1.78065			1.78065
P19338	116	K	Nucleolin	NCL		1.264		0.71	0.71	0.7		1.78028		1.78028
P61513	7	K	60S ribosomal protein L37a	RPL37A		1.513		0.91	0.85	0.84		1.78		1.78
P26358	45	K	DNA (cytosine-5)-methyltransferase 1	DNMT1	1.139			0.64	0.67	0.66	1.77969			1.77969
P63096	35	K	Guanine nucleotide-binding protein G(i) subunit alpha-2	GNAI2		1.456	1.287	0.73	0.79	0.75		1.84304	1.716	1.77952	0.07304
P68371	297	K	Tubulin beta-4B chain	TUBB4B	1.856		2.628	1.26	1.27	1.26	1.47302		2.08571	1.77937	0.322993
P07942	1579	K	Laminin subunit beta-1	LAMB1		1.277	1.5	0.84	0.77	0.79		1.65844	1.89873	1.77859	0.136786
Q9NY93	36	K	Probable ATP-dependent RNA helicase DDX56	DDX56	1.122	0.816	0.966	0.56	0.53	0.54	2.00357	1.53962	1.78889	1.77736	0.0418287
P22392	12	K	Nucleoside diphosphate kinase A	NME1	1.795			1.01	0.97	0.95	1.77723			1.77723
P62081	183	K	40S ribosomal protein S7	RPS7	1.722		1.53	0.92	0.92	0.91	1.87174		1.68132	1.77653	0.109301
P06748	141	K	Nucleophosmin	NPM1	1.454	1.407	1.42	0.8	0.8	0.81	1.8175	1.75875	1.75309	1.77645	0.00105339
Q02878	260	K	60S ribosomal protein L6	RPL6	1.448	1.406	1.478	0.82	0.81	0.81	1.76585	1.7358	1.82469	1.77545	0.00169557
P98175	337	K	RNA-binding protein 10	RBM10			1.349	0.79	0.77	0.76			1.775	1.775
Q9NP79	71	K	Vacuolar protein sorting-associated protein VTA1 homolog	VTA1		3.132	2.23	1.55	1.5	1.53		2.088	1.45752	1.77276	0.333128
Q14534	452	K	Squalene monooxygenase	SQLE			1.79	0.93	0.85	1.01			1.77228	1.77228
P39023	356	K	60S ribosomal protein L3	RPL3	1.578	1.545	1.658	0.92	0.9	0.88	1.71522	1.71667	1.88409	1.77199	0.00781486
Q9BRR8	417	K	G patch domain-containing protein 1	GPATCH1	1.683			0.95		1.02	1.77158			1.77158
P04075	200	K	Fructose-bisphosphate aldolase A	ALDOA	1.685	1.783	1.882	1.01	1	1.01	1.66832	1.783	1.86337	1.77156	0.0079744
Q9UHD1	38	K	Cysteine and histidine-rich domain-containing protein 1	CHORDC1	1.984			1.12	1.09	1.08	1.77143			1.77143
O60264	264	K	SWI/SNF-related matrix-associated actin-dependent regulator of chromatin subfamily A member 5	SMARCA5		1.575		0.87	0.89	0.79		1.76966		1.76966
Q14974	73	K	Importin subunit beta-1	KPNB1	1.285	1.188	1.19	0.69	0.69	0.69	1.86232	1.72174	1.72464	1.76957	0.00540519
Q15181	22	K	Inorganic pyrophosphatase	PPA1		2.53		1.46	1.43	1.47		1.76923		1.76923
O95881	48	K	Thioredoxin domain-containing protein 12	TXNDC12		1.839		1.04	1.04	1.17		1.76827		1.76827
Q9UQ35	101	K	Serine/arginine repetitive matrix protein 2	SRRM2	1.036		1.304	0.64	0.65	0.68	1.61875		1.91765	1.7682	0.170922
Q9NQ55	113	K	Suppressor of SWI4 1 homolog	PPAN		1.043		0.65	0.59	0.6		1.7678		1.7678
P63096	67	K	Guanine nucleotide-binding protein G(i) subunit alpha-1	GNAI1		1.334	1.385	0.73	0.79	0.75		1.68861	1.84667	1.76764	0.0920423
Q8WTT2	445	K	Nucleolar complex protein 3 homolog	NOC3L	1.417	1.348	1.403	0.77	0.8	0.79	1.84026	1.685	1.77595	1.76707	0.00513152
Q9HB71	59	K	Calcyclin-binding protein	CACYBP			1.714	1.01	1.01	0.97			1.76701	1.76701
P18124	29	K	60S ribosomal protein L7	RPL7		1.625		0.92	0.92	0.91		1.7663		1.7663
P04406	263	K	Glyceraldehyde-3-phosphate dehydrogenase	GAPDH	1.629	1.936	1.695	1	0.99	0.99	1.629	1.95556	1.71212	1.76556	0.0237011
P61247	27	K	40S ribosomal protein S3a	RPS3A	1.682	1.57	1.619	0.91	0.93	0.92	1.84835	1.68817	1.75978	1.76544	0.00544961
Q6P5R6	101	K	60S ribosomal protein L22-like 1	RPL22L1	1.501	1.485	1.462	0.85	0.83	0.84	1.76588	1.78916	1.74048	1.76517	0.000505882
Q9NR30	448	K	Nucleolar RNA helicase 2	DDX21	1.308	1.123	1.013	0.66	0.65	0.64	1.98182	1.72769	1.58281	1.76411	0.033206
Q01650	25	K	Large neutral amino acids transporter small subunit 1	SLC7A5	1.215	1.228	1.278	0.69	0.7	0.72	1.76087	1.75429	1.775	1.76339	9.60951e-05
P36578	162	K	60S ribosomal protein L4	RPL4	1.759	1.338		0.87	0.89	0.89	2.02184	1.50337		1.7626	0.285281
P62333	206	K	26S protease regulatory subunit 10B	PSMC6			1.726	0.95	0.95	0.98			1.76122	1.76122
Q9BSJ8	1018	K	Extended synaptotagmin-1	ESYT1	2.847	1.662	1.697	1.17	1.21	1.15	2.43333	1.37355	1.47565	1.76085	0.207052
P02786	371	K	Transferrin receptor protein 1	TFRC	1.24	0.942	1.363	0.67	0.66	0.68	1.85075	1.42727	2.00441	1.76081	0.0692511
Q9H2P0	658	K	Activity-dependent neuroprotector homeobox protein	ADNP	1.469	0.612		0.61	0.55	0.6	2.4082	1.11273		1.76046	0.558907
P82930	83	K	28S ribosomal protein S34, mitochondrial	MRPS34	1.624		1.324	0.82	0.86	0.86	1.98049		1.53953	1.76001	0.247848
Q9UQ80	253	K	Proliferation-associated protein 2G4	PA2G4	1.521	1.877	1.515	0.91	0.94	0.94	1.67143	1.99681	1.6117	1.75998	0.0352346
O76003	110	K	Glutaredoxin-3	GLRX3	1.963	2.025	1.798	1.1	1.08	1.11	1.78455	1.875	1.61982	1.75979	0.0141903
P16070	715	K	CD44 antigen	CD44	1.202	1.205	1.113	0.67	0.68	0.65	1.79403	1.77206	1.71231	1.75947	0.00154686
Q14978	110	K	Nucleolar and coiled-body phosphoprotein 1	NOLC1	1.906	1.816	1.772	1	1.04	1.09	1.906	1.74615	1.62569	1.75928	0.01672
P29317	945	K	Ephrin type-A receptor 2	EPHA2	1.044		1.014	0.59	0.55	0.58	1.76949		1.74828	1.75888	0.0125832
Q9BXJ9	756	K	N-alpha-acetyltransferase 15, NatA auxiliary subunit	NAA15			1.653	0.98	0.95	0.94			1.75851	1.75851
Q02790	213	K	Peptidyl-prolyl cis-trans isomerase FKBP4	FKBP4	1.565			0.89	0.9	0.84	1.75843			1.75843
Q01813	156	K	ATP-dependent 6-phosphofructokinase, platelet type	PFKP	1.728		2.086	1.09	1.07	1.08	1.58532		1.93148	1.7584	0.198749
P04899	249	K	Guanine nucleotide-binding protein G(i) subunit alpha-2	GNAI2	2.039			1.16	1.15	1.6	1.75776			1.75776
Q02878	130	K	60S ribosomal protein L6	RPL6	1.388	1.414	1.485	0.82	0.81	0.81	1.69268	1.74568	1.83333	1.75723	0.00437101
Q14008	1125	K	Cytoskeleton-associated protein 5	CKAP5		1.915		1.07	1.09	1.14		1.75688		1.75688
Q13813	2078	K	Spectrin alpha chain, non-erythrocytic 1	SPTAN1		1.932		1.1	1.1	1.1		1.75636		1.75636
Q08211	1073	K	ATP-dependent RNA helicase A	DHX9	1.702			0.97	0.97	0.99	1.75464			1.75464
Q9Y490	427	K	Talin-1	TLN1	1.912			1.09	1.11	1.11	1.75413			1.75413
P13674	57	K	Prolyl 4-hydroxylase subunit alpha-1	P4HA1	1.981			1.13	1.14	1.09	1.7531			1.7531
O00194	214	K	Ras-related protein Rab-27B	RAB27B	0.779	0.746	0.751	0.45	0.41	0.44	1.73111	1.81951	1.70682	1.75248	0.00309167
P78371	441	K	T-complex protein 1 subunit beta	CCT2		1.7	1.486	0.91	0.9	0.92		1.88889	1.61522	1.75205	0.160334
P35269	83	K	General transcription factor IIF subunit 1	GTF2F1	2.29		2.005	1.29	1.17	1.16	1.77519		1.72845	1.75182	0.0279712
Q8WTT2	123	K	Nucleolar complex protein 3 homolog	NOC3L	1.324	1.427		0.77	0.8	0.79	1.71948	1.78375		1.75162	0.0384455
P29692	189	K	Elongation factor 1-beta	EEF1B2		1.629		0.99	0.93	0.98		1.75161		1.75161
P26373	123	K	60S ribosomal protein L13	RPL13	1.572	1.347	1.494	0.85	0.84	0.83	1.84941	1.60357	1.8	1.75099	0.0146629
P11021	376	K	78 kDa glucose-regulated protein	HSPA5	1.6	1.517	2.91	1.15	1.16	1.14	1.3913	1.30776	2.55263	1.75056	0.266677
Q86VS8	324	K	Protein Hook homolog 3	HOOK3			1.593	0.78	0.94	0.91			1.75055	1.75055
Q9NVI7	562	K	ATPase family AAA domain-containing protein 3A	ATAD3A	1.575			0.9	0.95	0.87	1.75			1.75
P00492	166	K	Hypoxanthine-guanine phosphoribosyltransferase	HPRT1		1.771	1.657	0.99	0.97	0.99		1.82577	1.67374	1.74976	0.0906653
Q9NR30	320	K	Nucleolar RNA helicase 2	DDX21	1.135		1.138	0.66	0.65	0.64	1.7197		1.77812	1.74891	0.0350846
Q92890	255	K	Ubiquitin fusion degradation protein 1 homolog	UFD1L	2.133	1.549	1.773	1.04	0.98	1.1	2.05096	1.58061	1.61182	1.7478	0.056647
P62851	52	K	40S ribosomal protein S25	RPS25	1.605	1.522	1.502	0.88	0.88	0.89	1.82386	1.72955	1.68764	1.74702	0.00433352
Q9BQE3	336	K	Tubulin alpha-1B chain	TUBA1B	1.921			1.1	1.08	1.09	1.74636			1.74636
P41250	733	K	Glycine--tRNA ligase	GARS	1.653	1.731	1.485	0.93	0.92	0.94	1.77742	1.88152	1.57979	1.74624	0.0204461
Q9UIJ7	64	K	GTP:AMP phosphotransferase AK3, mitochondrial	AK3			1.309	0.7	0.75	0.75			1.74533	1.74533
Q9NR30	224	K	Nucleolar RNA helicase 2	DDX21	1.053	1.309	1.041	0.66	0.65	0.64	1.59545	2.01385	1.62656	1.74529	0.0455913
P07900	209	K	Heat shock protein HSP 90-alpha	HSP90AA1	2.119	2.206		1.2	1.28	1.21	1.76583	1.72344		1.74464	0.0256159
P30153	472	K	Serine/threonine-protein phosphatase 2A 65 kDa regulatory subunit A alpha isoform	PPP2R1A	1.667	1.736	1.515	0.95	0.93	0.94	1.75474	1.86667	1.6117	1.74437	0.0144201
P35580	1281	K	Myosin-10	MYH10			1.988	1.15	1.16	1.14			1.74386	1.74386
Q12849	337	K	G-rich sequence factor 1	GRSF1	2.232			1.28	1.29	1.27	1.74375			1.74375
P08962	110	K	CD63 antigen	CD63	1.271	1.196	1.13	0.59	0.72	0.8	2.15424	1.66111	1.4125	1.74262	0.108578
P49588	235	K	Alanine--tRNA ligase, cytoplasmic	AARS	1.393			0.8	0.81	0.82	1.74125			1.74125
Q53T59	70	K	HCLS1-binding protein 3	HS1BP3	2.333			1.34	1.45	1.36	1.74104			1.74104
P46778	122	K	60S ribosomal protein L21	RPL21	1.459	1.425	1.38	0.82	0.83	0.8	1.77927	1.71687	1.725	1.74038	0.00104808
O76021	380	K	Ribosomal L1 domain-containing protein 1	RSL1D1	1.187	1.346	1.118	0.7	0.69	0.71	1.69571	1.95072	1.57465	1.74036	0.0320117
O00303	161	K	Eukaryotic translation initiation factor 3 subunit F	EIF3F	1.525		1.64	0.92	0.92	0.9	1.65761		1.82222	1.73992	0.0993353
Q9Y6D9	143	K	Mitotic spindle assembly checkpoint protein MAD1	MAD1L1		1.283	1.548	0.98		0.89			1.73933	1.73933
P84098	128	K	60S ribosomal protein L19	RPL19	1.42	1.43		0.82	0.82	0.8	1.73171	1.7439		1.7378	0.00744029
Q02878	100	K	60S ribosomal protein L6	RPL6	1.5	1.426	1.315	0.82	0.81	0.81	1.82927	1.76049	1.62346	1.73774	0.00993513
Q9NW13	269	K	RNA-binding protein 28	RBM28	1.178	1.165	1.198	0.74	0.69	0.62	1.59189	1.68841	1.93226	1.73752	0.0271397
Q8N4H5	17	K	Mitochondrial import receptor subunit TOM5 homolog	TOMM5		0.97	1.032	0.78	0.48	0.71		2.02083	1.45352	1.73718	0.317264
Q8WWM7	538	K	Ataxin-2-like protein	ATXN2L	1.312	1.549		0.84	0.81	0.8	1.5619	1.91235		1.73713	0.206456
Q07020	97	K	60S ribosomal protein L18	RPL18		1.372	1.509	0.83	0.84	0.82		1.63333	1.84024	1.73679	0.124793
P36578	259	K	60S ribosomal protein L4	RPL4	1.493	1.49	1.618	0.87	0.89	0.89	1.71609	1.67416	1.81798	1.73608	0.00501054
Q9Y265	427	K	RuvB-like 1	RUVBL1	1.736			1	1.01	1.01	1.736			1.736
P07814	513	K	Bifunctional glutamate/proline--tRNA ligase	EPRS	1.753			1.01	1.03	1.01	1.73564			1.73564
Q9GZQ8	42	K	Microtubule-associated proteins 1A/1B light chain 3B	MAP1LC3B	1.753			1.01	1.03	1.04	1.73564			1.73564
P46940	1128	K	Ras GTPase-activating-like protein IQGAP1	IQGAP1		1.961		1.13	1.13	1.15		1.7354		1.7354
Q9Y3A5	184	K	Ribosome maturation protein SBDS	SBDS	2.695	2.476		1.49	1.49	1.49	1.80872	1.66174		1.73523	0.0893982
P0CW22	44	K	40S ribosomal protein S17-like	RPS17L	1.596			0.92	0.97	0.95	1.73478			1.73478
P68363	304	K	Tubulin alpha-1B chain	TUBA1B		2.133		1.24	1.23	1.26		1.73415		1.73415
O43852	255	K	Calumenin	CALU	1.751			1.01	1	1.01	1.73366			1.73366
Q8IY81	233	K	pre-rRNA processing protein FTSJ3	FTSJ3	1.504	1.407	1.313	0.79	0.83	0.82	1.9038	1.69518	1.60122	1.7334	0.0215761
P63173	9	K	60S ribosomal protein L38	RPL38	1.639		1.617	0.93	0.93	0.95	1.76237		1.70211	1.73224	0.0370047
Q96J01	122	K	THO complex subunit 3	THOC3			1.541	0.96	1.01	0.89			1.73146	1.73146
Q9Y6A9	88	K	Signal peptidase complex subunit 1	SPCS1	1.579	1.504	1.294	0.82	0.9	0.81	1.92561	1.67111	1.59753	1.73142	0.026599
P27635	101	K	60S ribosomal protein L10	RPL10	1.523			0.88	0.92	0.93	1.73068			1.73068
P39023	349	K	60S ribosomal protein L3	RPL3	1.523	1.547	1.598	0.92	0.9	0.88	1.65543	1.71889	1.81591	1.73008	0.00607158
Q8TDD1	567	K	ATP-dependent RNA helicase DDX54	DDX54	0.894	0.892	0.877	0.51	0.53	0.5	1.75294	1.68302	1.754	1.72999	0.00154905
Q16658	471	K	Fascin	FSCN1			3.286	1.9	1.92	1.9			1.72947	1.72947
O60271	547	K	C-Jun-amino-terminal kinase-interacting protein 4	SPAG9	2.963	2.958	2.71	1.68	1.66	1.65	1.76369	1.78193	1.64242	1.72935	0.00536114
Q9BVP2	135	K	Guanine nucleotide-binding protein-like 3	GNL3	1.503	1.17	1.41	0.79	0.78	0.79	1.90253	1.5	1.78481	1.72911	0.0380058
P62277	78	K	40S ribosomal protein S13	RPS13	1.634	1.518	1.585	0.92	0.91	0.91	1.77609	1.66813	1.74176	1.72866	0.00285271
O75947	78	K	ATP synthase subunit d, mitochondrial	ATP5H		1.763		1.05	1.02	1.05		1.72843		1.72843
Q9NVP1	571	K	ATP-dependent RNA helicase DDX18	DDX18	1.208	1.506	1.214	0.75	0.77	0.75	1.61067	1.95584	1.61867	1.72839	0.0346889
P11586	832	K	C-1-tetrahydrofolate synthase, cytoplasmic	MTHFD1	1.85		1.883	1.08	1.08	1.08	1.71296		1.74352	1.72824	0.0188822
Q5BJD5	100	K	Transmembrane protein 41B	TMEM41B	3.162			1.83	1.75	1.62	1.72787			1.72787
Q01082	2362	K	Spectrin beta chain, non-erythrocytic 1	SPTBN1	1.905	1.747	1.928	1.07	1.08	1.08	1.78037	1.61759	1.78519	1.72772	0.00848392
O43395	270	K	U4/U6 small nuclear ribonucleoprotein Prp3	PRPF3			1.641	1	0.97	0.95			1.72737	1.72737
P62851	98	K	40S ribosomal protein S25	RPS25	1.495	1.543	1.539	0.88	0.88	0.89	1.69886	1.75341	1.72921	1.72716	0.000705576
P48643	241	K	T-complex protein 1 subunit epsilon	CCT5	1.546	1.474	1.779	0.93	0.93	0.92	1.66237	1.58495	1.9337	1.727	0.0302949
P46100	999	K	Transcriptional regulator ATRX	ATRX			1.157	0.87	0.86	0.67			1.72687	1.72687
O14974	294	K	Protein phosphatase 1 regulatory subunit 12A	PPP1R12A	1.755	1.613		0.99	0.96	1.04	1.77273	1.68021		1.72647	0.0571754
P62424	259	K	60S ribosomal protein L7a	RPL7A		1.525	1.409	0.85	0.85	0.85		1.79412	1.65765	1.72588	0.0841393
Q9UG63	133	K	ATP-binding cassette sub-family F member 2	ABCF2	1.311	1.39	1.466	0.82	0.83	0.77	1.59878	1.6747	1.9039	1.72579	0.0231219
Q99832	430	K	T-complex protein 1 subunit eta	CCT7	1.759	1.752	1.488	0.97	0.95	0.98	1.8134	1.84421	1.51837	1.72533	0.0294061
P46778	129	K	60S ribosomal protein L21	RPL21	1.398	1.415	1.413	0.82	0.83	0.8	1.70488	1.70482	1.76625	1.72532	0.00119227
P84098	92	K	60S ribosomal protein L19	RPL19	1.358	1.482	1.37	0.82	0.82	0.8	1.6561	1.80732	1.7125	1.7253	0.00550465
P62750	123	K	60S ribosomal protein L23a	RPL23A	1.57	1.912	1.63	0.91			1.72527			1.72527
Q8WX93	915	K	Palladin	PALLD	1.984			1.15	1.2	1.23	1.72522			1.72522
P63000	183	K	Ras-related C3 botulinum toxin substrate 1	RAC1	1.545	1.889		0.99	1	0.99	1.56061	1.889		1.7248	0.19738
P62424	20	K	60S ribosomal protein L7a	RPL7A	1.481	1.433	1.482	0.85	0.85	0.85	1.74235	1.68588	1.74353	1.72392	0.00103413
Q9NYF8	567	K	Bcl-2-associated transcription factor 1	BCLAF1	1.574	1.241	1.459	0.83	0.83	0.82	1.89639	1.49518	1.77927	1.72361	0.0383237
P16989	113	K	Y-box-binding protein 3	YBX3	1.021	1.179	1.091	0.64	0.64	0.63	1.59531	1.84219	1.73175	1.72308	0.0143116
Q99729	215	K	Heterogeneous nuclear ribonucleoprotein A/B	HNRNPAB			1.12	0.65	0.71	0.65			1.72308	1.72308
Q15050	265	K	Ribosome biogenesis regulatory protein homolog	RRS1	1.192	1.256	1.203	0.68	0.72	0.72	1.75294	1.74444	1.67083	1.72274	0.00194581
P08240	492	K	Signal recognition particle receptor subunit alpha	SRPR	1.309			0.76	0.72	0.71	1.72237			1.72237
O43615	187	K	Mitochondrial import inner membrane translocase subunit TIM44	TIMM44	1.318	1.113	1.41	0.75	0.74	0.74	1.75733	1.50405	1.90541	1.72226	0.037288
Q9UMS4	206	K	Pre-mRNA-processing factor 19	PRPF19	1.481			0.86	0.88	0.89	1.72209			1.72209
P49585	238	K	Choline-phosphate cytidylyltransferase A	PCYT1A		2.256	2.116	1.27	1.3	1.24		1.73538	1.70645	1.72092	0.0180616
P26639	75	K	Threonine--tRNA ligase, cytoplasmic	TARS	1.32	1.261	1.495	0.78	0.8	0.79	1.69231	1.57625	1.89241	1.72032	0.0237719
P49585	239	K	Choline-phosphate cytidylyltransferase A	PCYT1A	2.162	2.273	2.119	1.27	1.3	1.24	1.70236	1.74846	1.70887	1.7199	0.000600022
Q7LBR1	110	K	Charged multivesicular body protein 1b	CHMP1B	2.184			1.27	1.46	1.46	1.71969			1.71969
P11387	333	K	DNA topoisomerase 1	TOP1			1.496	0.86	0.92	0.87			1.71954	1.71954
P11216	552	K	Glycogen phosphorylase, brain form	PYGB	2.269		2.441	1.38	1.36	1.36	1.6442		1.79485	1.71953	0.0935715
Q16204	286	K	Coiled-coil domain-containing protein 6	CCDC6		2.097		1.38	1.22	1.24		1.71885		1.71885
Q15738	31	K	Sterol-4-alpha-carboxylate 3-dehydrogenase, decarboxylating	NSDHL	1.253	1.27	1.403	0.78	0.78	0.73	1.60641	1.62821	1.92192	1.71884	0.0287528
P46778	43	K	60S ribosomal protein L21	RPL21	1.34	1.458	1.41	0.82	0.83	0.8	1.63415	1.75663	1.7625	1.71776	0.00505841
P25685	248	K	DnaJ homolog subfamily B member 1	DNAJB1	3.321	3.303	3.402	1.91	1.98	1.95	1.73874	1.66818	1.74462	1.71718	0.00175416
Q02878	192	K	60S ribosomal protein L6	RPL6	1.56	1.324	1.307	0.82	0.81	0.81	1.90244	1.63457	1.61358	1.71686	0.024321
P14866	393	K	Heterogeneous nuclear ribonucleoprotein L	HNRNPL	1.546	1.254		0.82	0.81	0.81	1.88537	1.54815		1.71676	0.204457
Q07020	78	K	60S ribosomal protein L18	RPL18		1.442		0.83	0.84	0.82		1.71667		1.71667
P36578	157	K	60S ribosomal protein L4	RPL4	1.461	1.61	1.478	0.87	0.89	0.89	1.67931	1.80899	1.66067	1.71632	0.00629991
P62906	78	K	60S ribosomal protein L10a	RPL10A	1.615	1.551	1.417	0.9	0.89	0.88	1.79444	1.7427	1.61023	1.71579	0.0086946
O43707	421	K	Alpha-actinin-4	ACTN4	1.591	1.976	2.283	1.14	1.13	1.14	1.39561	1.74867	2.00263	1.71564	0.0799967
P00338	278	K	L-lactate dehydrogenase A chain	LDHA	1.638	2.015	1.545	1.01	1.01	1.01	1.62178	1.99505	1.5297	1.71551	0.054504
Q9ULC4	8	K	Malignant T-cell-amplified sequence 1	MCTS1		2.163	1.217	1.02	1	0.96		2.163	1.26771	1.71535	0.461198
P17987	499	K	T-complex protein 1 subunit alpha	TCP1	1.821	1.942	1.448	1.01	1.01	1.02	1.80297	1.92277	1.41961	1.71512	0.0613894
P31948	222	K	Stress-induced-phosphoprotein 1	STIP1	1.762	1.768	1.868	1.06	1.05	1.04	1.66226	1.68381	1.79615	1.71408	0.00503005
P06733	126	K	Alpha-enolase	ENO1	1.68	1.698	1.678	0.98	0.99	0.98	1.71429	1.71515	1.71224	1.71389	2.18501e-06
Q9BQG0	56	K	Myb-binding protein 1A	MYBBP1A	1.071	1.114	1.02	0.61	0.64	0.62	1.75574	1.74063	1.64516	1.71384	0.00350875
P46778	55	K	60S ribosomal protein L21	RPL21	1.312		1.461	0.82	0.83	0.8	1.6		1.82625	1.71313	0.140494
P41250	115	K	Glycine--tRNA ligase	GARS	1.548	1.678	1.55	0.93	0.92	0.94	1.66452	1.82391	1.64894	1.71246	0.00911151
Q9H583	503	K	HEAT repeat-containing protein 1	HEATR1		1.128	1.425	0.78	0.74	0.75		1.52432	1.9	1.71216	0.227288
O43765	183	K	Small glutamine-rich tetratricopeptide repeat-containing protein alpha	SGTA	1.912	1.858	1.888	1.08	1.09	1.14	1.77037	1.70459	1.65614	1.71037	0.00324125
P07900	539	K	Heat shock protein HSP 90-alpha	HSP90AA1	2.194	2.125	1.987	1.2	1.28	1.21	1.82833	1.66016	1.64215	1.71021	0.0102923
P31153	234	K	S-adenosylmethionine synthase isoform type-2	MAT2A	1.367			0.8	0.81	0.83	1.70875			1.70875
O60271	603	K	C-Jun-amino-terminal kinase-interacting protein 4	SPAG9			2.819	1.68	1.66	1.65			1.70848	1.70848
Q9H583	1827	K	HEAT repeat-containing protein 1	HEATR1	1.293	1.247	1.336	0.78	0.74	0.75	1.65769	1.68514	1.78133	1.70805	0.00417812
Q13948	186	K	Protein CASP	CUX1	1.503			0.88	0.75	0.75	1.70795			1.70795
P19338	62	K	Nucleolin	NCL		1.204	1.204	0.71	0.71	0.7		1.69577	1.72	1.70789	0.0154023
P06748	257	K	Nucleophosmin	NPM1	1.369	1.337	1.41	0.8	0.8	0.81	1.71125	1.67125	1.74074	1.70775	0.00121204
P38159	41	K	RNA-binding motif protein, X chromosome	RBMX	1.172	1.352	1.366	0.77	0.75	0.76	1.52208	1.80267	1.79737	1.70737	0.0247851
Q9Y266	327	K	Nuclear migration protein nudC	NUDC	1.673			0.98	0.98	0.98	1.70714			1.70714
P49588	625	K	Alanine--tRNA ligase, cytoplasmic	AARS	1.276	1.437	1.436	0.8	0.81	0.82	1.595	1.77407	1.75122	1.70676	0.00937477
P62424	34	K	60S ribosomal protein L7a	RPL7A	1.425	1.463	1.464	0.85	0.85	0.85	1.67647	1.72118	1.72235	1.70667	0.000684348
Q6NUK1	189	K	Calcium-binding mitochondrial carrier protein SCaMC-1	SLC25A24		1.335	0.828	0.62	0.63	0.64		2.11905	1.29375	1.7064	0.439566
P08195	147	K	4F2 cell-surface antigen heavy chain	SLC3A2			1.126	0.67	0.66	0.66			1.70606	1.70606
Q02878	262	K	60S ribosomal protein L6	RPL6	1.403	1.384	1.374	0.82	0.81	0.81	1.71098	1.70864	1.6963	1.7053	6.25365e-05
Q15424	423	K	Scaffold attachment factor B2	SAFB2		1.296		0.79	0.76	0.76		1.70526		1.70526
P00338	228	K	L-lactate dehydrogenase A chain	LDHA	1.968		1.475	1.01	1.01	1.01	1.94851		1.4604	1.70446	0.290031
Q8N257	6	K	Histone H2B type 3-B	HIST3H2BB		1.963	1.327	1.01	0.95	0.99		2.06632	1.3404	1.70336	0.401346
Q01650	19	K	Large neutral amino acids transporter small subunit 1	SLC7A5	1.252	1.193	1.145	0.69	0.7	0.72	1.81449	1.70429	1.59028	1.70302	0.0124784
P20042	324	K	Eukaryotic translation initiation factor 2 subunit 2	EIF2S2	1.51	1.453		0.88	0.86	0.87	1.71591	1.68953		1.70272	0.0168911
Q9Y2X3	365	K	Nucleolar protein 58	NOP58			1.413	0.82	0.81	0.83			1.70241	1.70241
P27635	13	K	60S ribosomal protein L10	RPL10			1.583	0.88	0.92	0.93			1.70215	1.70215
P00558	216	K	Phosphoglycerate kinase 1	PGK1	1.716	1.697	1.93	1.05	1.05	1.04	1.63429	1.61619	1.85577	1.70208	0.0175778
P67936	197	K	Tropomyosin alpha-4 chain	TPM4	1.999	1.898	1.849	1.11	1.13	1.14	1.8009	1.67965	1.62193	1.70083	0.00838761
P30153	194	K	Serine/threonine-protein phosphatase 2A 65 kDa regulatory subunit A alpha isoform	PPP2R1A		1.581		0.95	0.93	0.94		1.7		1.7
O75153	302	K	Clustered mitochondria protein homolog	CLUH		1.628	1.783	1.05	1.02	0.99		1.59608	1.80101	1.69854	0.130216
P48651	281	K	Phosphatidylserine synthase 1	PTDSS1			1.392		0.94	0.82			1.69756	1.69756
P61353	73	K	60S ribosomal protein L27	RPL27	1.427	1.464	1.282	0.84	0.81	0.81	1.69881	1.80741	1.58272	1.69631	0.0127719
O60832	394	K	H/ACA ribonucleoprotein complex subunit 4	DKC1	1.204			0.71	0.73	0.71	1.69577			1.69577
P19338	223	K	Nucleolin	NCL	1.204			0.71	0.71	0.7	1.69577			1.69577
P06748	239	K	Nucleophosmin	NPM1		1.38	1.349	0.8	0.8	0.81		1.725	1.66543	1.69522	0.0385236
Q92598	356	K	Heat shock protein 105 kDa	HSPH1	1.39	1.525	1.254	0.82	0.82	0.82	1.69512	1.85976	1.52927	1.69472	0.027142
O14737	66	K	Programmed cell death protein 5	PDCD5		1.796		1.09	1.06	1.1		1.69434		1.69434
Q01813	736	K	ATP-dependent 6-phosphofructokinase, platelet type	PFKP	1.854	1.939	1.695	1.09	1.07	1.08	1.70092	1.81215	1.56944	1.69417	0.0149727
P62979	104	K	Ubiquitin-40S ribosomal protein S27a	RPS27A	1.825	1.603	1.968	1.07	1.08	1.04	1.70561	1.48426	1.89231	1.69406	0.0406848
Q15125	221	K	3-beta-hydroxysteroid-Delta(8),Delta(7)-isomerase	EBP	1.258	1.296	1.356	0.75	0.8	0.76	1.67733	1.62	1.78421	1.69385	0.00713669
P05023	773	K	Sodium/potassium-transporting ATPase subunit alpha-1	ATP1A1	1.738	1.666	1.677	1	1.01	0.99	1.738	1.6495	1.69394	1.69381	0.00202741
Q14690	1706	K	Protein RRP5 homolog	PDCD11	1.507			0.89	0.85	0.8	1.69326			1.69326
Q9NQP4	43	K	Prefoldin subunit 4	PFDN4	1.578	1.672		0.94	0.98	0.89	1.67872	1.70612		1.69242	0.017808
P62318	124	K	Small nuclear ribonucleoprotein Sm D3	SNRPD3	1.849	1.6		1.01	1.03	1.02	1.83069	1.5534		1.69205	0.175767
Q8NC51	39	K	Plasminogen activator inhibitor 1 RNA-binding protein	SERBP1	1.708	1.643	1.824	1.02	1.02	1.02	1.67451	1.61078	1.78824	1.69118	0.00835152
P04075	28	K	Fructose-bisphosphate aldolase A	ALDOA	1.772	1.612	1.722	1.01	1	1.01	1.75446	1.612	1.70495	1.69047	0.00544107
P15880	275	K	40S ribosomal protein S2	RPS2	1.513	1.496		0.89	0.89	0.92	1.7	1.6809		1.69045	0.0124519
P00338	224	K	L-lactate dehydrogenase A chain	LDHA	1.67	1.684	1.768	1.01	1.01	1.01	1.65347	1.66733	1.7505	1.69043	0.00287618
P18669	138	K	Phosphoglycerate mutase 1	PGAM1	1.704	1.905	1.767	1.06	1.08	1.04	1.60755	1.76389	1.69904	1.69016	0.00641433
P14618	125	K	Pyruvate kinase PKM	PKM	1.701	1.653	1.867	1.03	1.03	1.03	1.65146	1.60485	1.81262	1.68964	0.0122656
P19338	87	K	Nucleolin	NCL	1.22	1.137	1.224	0.71	0.71	0.7	1.71831	1.60141	1.74857	1.68943	0.00629355
Q9NR30	449	K	Nucleolar RNA helicase 2	DDX21	1.115			0.66	0.65	0.64	1.68939			1.68939
P62277	93	K	40S ribosomal protein S13	RPS13	1.57	1.489	1.57	0.92	0.91	0.91	1.70652	1.63626	1.72527	1.68935	0.00230865
O60218	233	K	Aldo-keto reductase family 1 member B10	AKR1B10	2.134	2.228	1.955	1.24	1.26	1.24	1.72097	1.76825	1.57661	1.68861	0.0103465
P09429	7	K	High mobility group protein B1	HMGB1		1.716	1.779	1.08	1.04	1.03		1.65	1.72718	1.68859	0.0503531
P61011	432	K	Signal recognition particle 54 kDa protein	SRP54	1.662	1.515	1.514	0.93	0.9	0.95	1.7871	1.68333	1.59368	1.68804	0.00975071
Q92598	84	K	Heat shock protein 105 kDa	HSPH1	1.305	1.482	1.364	0.82	0.82	0.82	1.59146	1.80732	1.66341	1.6874	0.0125422
Q7L1Q6	272	K	Basic leucine zipper and W2 domain-containing protein 1	BZW1		1.994	1.505	1.08	1.02	1.06		1.9549	1.41981	1.68736	0.320347
P36578	380	K	60S ribosomal protein L4	RPL4		1.472	1.531	0.87	0.89	0.89		1.65393	1.72022	1.68708	0.0433659
P43243	132	K	Matrin-3	MATR3	1.396		1.336	0.81	0.83	0.81	1.72346		1.64938	1.68642	0.0484843
P49207	108	K	60S ribosomal protein L34	RPL34		1.412	1.283	0.79	0.79	0.81		1.78734	1.58395	1.68565	0.131627
Q7Z4V5	439	K	Hepatoma-derived growth factor-related protein 2	HDGFRP2	2.303	1.887	2.154	1.22	1.32	1.24	1.8877	1.42955	1.7371	1.68478	0.0535187
Q9BQG0	1167	K	Myb-binding protein 1A	MYBBP1A	0.948	1.049	1.153	0.61	0.64	0.62	1.5541	1.63906	1.85968	1.68428	0.0255518
P46783	59	K	40S ribosomal protein S10	RPS10		1.545	1.699	0.97	0.99	0.94		1.56061	1.80745	1.68403	0.159052
Q9NUQ3	161	K	Alpha-taxilin	TXLNA			1.364	0.95	0.94	0.81			1.68395	1.68395
P25205	152	K	DNA replication licensing factor MCM3	MCM3		1.37	1.391	0.83	0.83	0.81		1.6506	1.71728	1.68394	0.0438192
P63241	85	K	Eukaryotic translation initiation factor 5A-1	EIF5A	1.584	1.627	1.638	0.96	0.96	0.96	1.65	1.69479	1.70625	1.68368	0.000943861
Q9UIG0	853	K	Tyrosine-protein kinase BAZ1B	BAZ1B	1.09	1.141	1.099	0.63	0.7	0.65	1.73016	1.63	1.69077	1.68364	0.00271273
P07942	1659	K	Laminin subunit beta-1	LAMB1	1.347	1.358		0.84	0.77	0.79	1.60357	1.76364		1.6836	0.104456
P55010	248	K	Eukaryotic translation initiation factor 5	EIF5	1.918	1.911	2.128	1.25	1.16	1.14	1.5344	1.64741	1.86667	1.68283	0.0292695
P41250	108	K	Glycine--tRNA ligase	GARS	1.632	1.497	1.566	0.93	0.92	0.94	1.75484	1.62717	1.66596	1.68266	0.00456463
P40227	388	K	T-complex protein 1 subunit zeta	CCT6A		1.632		0.97	0.97	0.98		1.68247		1.68247
P36578	165	K	60S ribosomal protein L4	RPL4	1.482	1.482	1.493	0.87	0.89	0.89	1.70345	1.66517	1.67753	1.68205	0.000409966
Q9BXJ9	305	K	N-alpha-acetyltransferase 15, NatA auxiliary subunit	NAA15	1.44	1.771	1.608	0.98	0.95	0.94	1.46939	1.86421	1.71064	1.68141	0.0401069
O75153	1170	K	Clustered mitochondria protein homolog	CLUH	1.765			1.05	1.02	0.99	1.68095			1.68095
P09429	172	K	High mobility group protein B1	HMGB1	1.769		1.775	1.08	1.04	1.03	1.63796		1.7233	1.68063	0.0562939
Q02878	251	K	60S ribosomal protein L6	RPL6	1.344	1.386	1.368	0.82	0.81	0.81	1.63902	1.71111	1.68889	1.67967	0.00147177
P11387	587	K	DNA topoisomerase 1	TOP1	1.458	1.53	1.462	0.86	0.92	0.87	1.69535	1.66304	1.68046	1.67962	0.000282899
Q9UIC8	37	K	Leucine carboxyl methyltransferase 1	LCMT1	2.62			1.56			1.67949			1.67949
Q9NYP7	199	K	Elongation of very long chain fatty acids protein 5	ELOVL5	1.621	1.629	1.619		0.97			1.67938		1.67938
P62269	94	K	40S ribosomal protein S18	RPS18	2.046	1.328	1.456	0.95	0.96	0.97	2.15368	1.38333	1.50103	1.67935	0.146619
Q9H7B2	83	K	Ribosome production factor 2 homolog	RPF2		1.041		0.63	0.62	0.65		1.67903		1.67903
P40227	5	K	T-complex protein 1 subunit zeta	CCT6A			1.645	0.97	0.97	0.98			1.67857	1.67857
P63173	50	K	60S ribosomal protein L38	RPL38	1.572	1.614	1.529	0.93	0.93	0.95	1.69032	1.73548	1.60947	1.67843	0.00439847
Q8NC51	320	K	Plasminogen activator inhibitor 1 RNA-binding protein	SERBP1	1.732	1.741	1.662	1.02	1.02	1.02	1.69804	1.70686	1.62941	1.6781	0.00194906
P25685	286	K	DnaJ homolog subfamily B member 1	DNAJB1	3.142	2.977	3.675	1.91	1.98	1.95	1.64503	1.50354	1.88462	1.67773	0.0381009
Q15382	120	K	GTP-binding protein Rheb	RHEB	1.65		1.671	0.98	0.99	1	1.68367		1.671	1.67734	0.0084223
P39019	143	K	40S ribosomal protein S19	RPS19	1.718	1.462	1.432	0.92	0.92	0.91	1.86739	1.58913	1.57363	1.67672	0.0285652
Q15075	227	K	Early endosome antigen 1	EEA1		1.643		0.96	0.98	0.99		1.67653		1.67653
Q9Y6D9	79	K	Mitotic spindle assembly checkpoint protein MAD1	MAD1L1			1.492	0.98		0.89			1.6764	1.6764
P27635	208	K	60S ribosomal protein L10	RPL10	1.522	1.535	1.517	0.88	0.92	0.93	1.72955	1.66848	1.63118	1.6764	0.002684
Q16186	21	K	Proteasomal ubiquitin receptor ADRM1	ADRM1			1.844	1.13	1.11	1.1			1.67636	1.67636
P09651	350	K	Heterogeneous nuclear ribonucleoprotein A1	HNRNPA1	1.476	1.456		0.88	0.87	0.88	1.67727	1.67356		1.67542	0.00247233
P62753	149	K	40S ribosomal protein S6	RPS6	1.415	1.414	1.375	0.83	0.83	0.85	1.70482	1.70361	1.61765	1.67536	0.00272768
P49588	771	K	Alanine--tRNA ligase, cytoplasmic	AARS	1.413		1.299	0.8	0.81	0.82	1.76625		1.58415	1.6752	0.119969
P55209	116	K	Nucleosome assembly protein 1-like 1	NAP1L1	1.491	1.544	1.488	0.89	0.91	0.9	1.67528	1.6967	1.65333	1.67511	0.000515501
P62753	58	K	40S ribosomal protein S6	RPS6	1.568	1.344	1.288	0.83	0.83	0.85	1.88916	1.61928	1.51529	1.67458	0.0385636
P06748	267	K	Nucleophosmin	NPM1	1.337	1.31	1.389	0.8	0.8	0.81	1.67125	1.6375	1.71481	1.67452	0.00164701
Q9Y3F4	262	K	Serine-threonine kinase receptor-associated protein	STRAP	2.269	1.963		1.26	1.27	1.28	1.80079	1.54567		1.67323	0.166674
P06748	229	K	Nucleophosmin	NPM1	1.333	1.321	1.378	0.8	0.8	0.81	1.66625	1.65125	1.70123	1.67291	0.000725669
O76021	448	K	Ribosomal L1 domain-containing protein 1	RSL1D1	1.15	1.221	1.139	0.7	0.69	0.71	1.64286	1.76957	1.60423	1.67222	0.00817611
Q96KC8	260	K	DnaJ homolog subfamily C member 1	DNAJC1	3.043			1.82	1.67	1.9	1.67198			1.67198
Q9ULC4	99	K	Malignant T-cell-amplified sequence 1	MCTS1	1.774	1.555	1.651	1.02	1	0.96	1.73922	1.555	1.71979	1.67134	0.0111755
P19338	124	K	Nucleolin	NCL		1.16	1.196	0.71	0.71	0.7		1.6338	1.70857	1.67119	0.0500432
P53367	146	K	Arfaptin-1	ARFIP1	2.409	2.405	2.215	0.99	1.82	1.76	2.43333	1.32143	1.25852	1.67109	0.287484
Q9HC36	159	K	RNA methyltransferase-like protein 1	RNMTL1			1.27	0.74	0.75	0.76			1.67105	1.67105
Q86TB9	455	K	Protein PAT1 homolog 1	PATL1		1.604	1.197	0.81	0.83	0.85		1.93253	1.40824	1.67038	0.321592
Q8WUM4	614	K	Programmed cell death 6-interacting protein	PDCD6IP		2.004		1.2	1.2	1.23		1.67		1.67
Q8TEA8	123	K	D-tyrosyl-tRNA(Tyr) deacylase 1	DTD1			1.603	1.01	1.04	0.96			1.66979	1.66979
P19338	109	K	Nucleolin	NCL	1.196	1.175		0.71	0.71	0.7	1.68451	1.65493		1.66972	0.0198743
P20042	142	K	Eukaryotic translation initiation factor 2 subunit 2	EIF2S2	1.537	1.447	1.374	0.88	0.86	0.87	1.74659	1.68256	1.57931	1.66949	0.00785347
Q01469	103	K	Fatty acid-binding protein, epidermal	FABP5	1.184	1.215	1.091	0.7	0.7	0.69	1.69143	1.73571	1.58116	1.66943	0.00699359
Q9NR30	668	K	Nucleolar RNA helicase 2	DDX21	1.066	1.043	1.144	0.66	0.65	0.64	1.61515	1.60462	1.7875	1.66909	0.0115719
Q86UE4	314	K	Protein LYRIC	MTDH	1.29		2.068	1	1.04	1.01	1.29		2.04752	1.66876	0.429925
P11387	271	K	DNA topoisomerase 1	TOP1	1.501	1.437	1.475	0.86	0.92	0.87	1.74535	1.56196	1.6954	1.66757	0.00993546
P61247	85	K	40S ribosomal protein S3a	RPS3A	1.517			0.91	0.93	0.92	1.66703			1.66703
P07900	546	K	Heat shock protein HSP 90-alpha	HSP90AA1	2.112	1.787	2.231	1.2	1.28	1.21	1.76	1.39609	1.8438	1.66663	0.0582256
P26196	352	K	Probable ATP-dependent RNA helicase DDX6	DDX6	1.265		1.169	0.74	0.72	0.72	1.70946		1.62361	1.66654	0.0578199
P06748	54	K	Nucleophosmin	NPM1	1.325	1.341		0.8	0.8	0.81	1.65625	1.67625		1.66625	0.0135112
Q01813	724	K	ATP-dependent 6-phosphofructokinase, platelet type	PFKP	1.543	2.25	1.598	1.09	1.07	1.08	1.4156	2.1028	1.47963	1.66601	0.131224
Q9Y3C1	47	K	Nucleolar protein 16	NOP16	1.145	1.198	1.135	0.69	0.68	0.72	1.65942	1.76176	1.57639	1.66586	0.00958391
O43237	8	K	Cytoplasmic dynein 1 light intermediate chain 2	DYNC1LI2	1.671	1.909		1.08	1.07	1.01	1.54722	1.78411		1.66567	0.156939
P55209	82	K	Nucleosome assembly protein 1-like 1	NAP1L1			1.499	0.89	0.91	0.9			1.66556	1.66556
Q96AG4	126	K	Leucine-rich repeat-containing protein 59	LRRC59	1.546	1.598	1.667	0.98	0.94	0.97	1.57755	1.7	1.71856	1.66537	0.00656445
P39023	286	K	60S ribosomal protein L3	RPL3	1.238	1.946	1.309	0.92	0.9	0.88	1.34565	2.16222	1.4875	1.66512	0.163845
P04181	386	K	Ornithine aminotransferase, mitochondrial	OAT		2.664		1.62	1.6	1.59		1.665		1.665
Q8TDD1	764	K	ATP-dependent RNA helicase DDX54	DDX54	0.844	0.84	0.877	0.51	0.53	0.5	1.6549	1.58491	1.754	1.6646	0.00807285
P11233	115	K	Ras-related protein Ral-A	RALA	1.588	1.721	1.415	0.95	0.94	0.95	1.67158	1.83085	1.48947	1.66397	0.0315357
P07900	74	K	Heat shock protein HSP 90-alpha	HSP90AA1	2.074	2.02	2.036	1.2	1.28	1.21	1.72833	1.57812	1.68264	1.66303	0.00667602
P26038	3	K	Moesin	MSN		1.746		1.04	1.05	1.03		1.66286		1.66286
Q8NBJ4	83	K	Golgi membrane protein 1	GOLM1		1.43		0.9	0.86	0.86		1.66279		1.66279
P36578	14	K	60S ribosomal protein L4	RPL4	1.49	1.474	1.441	0.87	0.89	0.89	1.71264	1.65618	1.6191	1.66264	0.00251711
P84098	133	K	60S ribosomal protein L19	RPL19		1.363		0.82	0.82	0.8		1.6622		1.6622
P60842	381	K	Eukaryotic initiation factor 4A-I	EIF4A1	1.707	1.531	1.512	0.94	0.95	0.97	1.81596	1.61158	1.55876	1.6621	0.0204034
P33991	349	K	DNA replication licensing factor MCM4	MCM4	1.375		1.284	0.8	0.8	0.8	1.71875		1.605	1.66187	0.0769868
Q9HBH0	197	K	Rho-related GTP-binding protein RhoF	RHOF	2.243	2.232	2.308		1.43	1.31		1.56084	1.76183	1.66134	0.134762
O95347	802	K	Structural maintenance of chromosomes protein 2	SMC2		1.578		0.94	0.95	0.93		1.66105		1.66105
P04406	254	K	Glyceraldehyde-3-phosphate dehydrogenase	GAPDH	1.596	1.653	1.7	1	0.99	0.99	1.596	1.6697	1.71717	1.66096	0.00423961
P35610	283	K	Sterol O-acyltransferase 1	SOAT1	2.507			1.51	1.42	1.47	1.66026			1.66026
O43291	242	K	Kunitz-type protease inhibitor 2	SPINT2	0.808	0.767	0.732	0.47	0.48	0.44	1.71915	1.59792	1.66364	1.66023	0.00419792
Q08752	257	K	Peptidyl-prolyl cis-trans isomerase D	PPID	1.51			0.91	0.96	0.89	1.65934			1.65934
P78371	50	K	T-complex protein 1 subunit beta	CCT2	1.519	1.508	1.501	0.91	0.9	0.92	1.66923	1.67556	1.63152	1.65877	0.00065242
P63096	317	K	Guanine nucleotide-binding protein G(i) subunit alpha-2	GNAI2		1.309		0.73	0.79	0.75		1.65696		1.65696
Q9HB71	33	K	Calcyclin-binding protein	CACYBP	1.646	1.583	1.72	1.01	1.01	0.97	1.6297	1.56733	1.7732	1.65674	0.0126735
P40429	103	K	60S ribosomal protein L13a	RPL13A		1.42	1.593	0.86	0.92	0.9		1.54348	1.77	1.65674	0.152295
P62280	30	K	40S ribosomal protein S11	RPS11	1.371	1.481	1.419	0.87	0.84	0.87	1.57586	1.7631	1.63103	1.65666	0.0105637
P05023	21	K	Sodium/potassium-transporting ATPase subunit alpha-1	ATP1A1	1.719	1.872	1.381	1	1.01	0.99	1.719	1.85347	1.39495	1.6558	0.0589344
P53004	253	K	Biliverdin reductase A	BLVRA		2.467		1.53	1.49	1.5		1.6557		1.6557
Q01650	7	K	Large neutral amino acids transporter small subunit 1	SLC7A5	1.142			0.69	0.7	0.72	1.65507			1.65507
P21333	127	K	Filamin-B	FLNB	1.666	1.958	2	1.14	1.13	1.13	1.4614	1.73274	1.76991	1.65469	0.0315314
Q9BQE3	326	K	Tubulin alpha-1B chain	TUBA1B	1.82			1.1	1.08	1.09	1.65455			1.65455
P25205	556	K	DNA replication licensing factor MCM3	MCM3	1.373	1.334	1.376	0.83	0.83	0.81	1.65422	1.60723	1.69877	1.6534	0.0024448
O43290	701	K	U4/U6.U5 tri-snRNP-associated protein 1	SART1	1.703			1.03	1	1.11	1.6534			1.6534
Q8NFQ8	124	K	Torsin-1A-interacting protein 2	TOR1AIP2		2.018	3.005	1.56	1.49	1.54		1.35436	1.9513	1.65283	0.365392
O00560	173	K	Syntenin-1	SDCBP	1.636			0.99	1	1	1.65253			1.65253
O43818	25	K	U3 small nucleolar RNA-interacting protein 2	RRP9	1.633	1.622	1.736	0.98	1	1.04	1.66633	1.622	1.66923	1.65252	0.000821791
P33991	762	K	DNA replication licensing factor MCM4	MCM4		1.322		0.8	0.8	0.8		1.6525		1.6525
P21399	572	K	Cytoplasmic aconitate hydratase	ACO1	1.997	1.9		1.17	1.19	1.17	1.70684	1.59664		1.65174	0.0757553
Q8WZA0	61	K	Protein LZIC	LZIC	1.516		1.685	1.03	0.97	0.92	1.47184		1.83152	1.65168	0.236878
P49368	370	K	T-complex protein 1 subunit gamma	CCT3	1.618			0.98	0.99	0.99	1.65102			1.65102
Q9UIL1	122	K	Short coiled-coil protein	SCOC			2.063	1.41		1.25			1.6504	1.6504
Q86UP2	1350	K	Kinectin	KTN1	1.009	2.873	1.3	1.06	1.05	1.03	0.951887	2.73619	1.26214	1.65007	0.436613
O43707	622	K	Alpha-actinin-4	ACTN4		1.629	2.117	1.14	1.13	1.14		1.44159	1.85702	1.64931	0.27047
P31939	389	K	Bifunctional purine biosynthesis protein PURH	ATIC	1.471	1.364	1.774	0.94	0.9	0.95	1.56489	1.51556	1.86737	1.64927	0.040442
P22626	22	K	Heterogeneous nuclear ribonucleoproteins A2/B1	HNRNPA2B1		1.106	1.763	0.89	0.87	0.87		1.27126	2.02644	1.64885	0.438372
Q9P2R7	138	K	Succinyl-CoA ligase [ADP-forming] subunit beta, mitochondrial	SUCLA2			1.945	1.18	1.21	1.18			1.64831	1.64831
P11387	280	K	DNA topoisomerase 1	TOP1		1.558	1.392	0.86	0.92	0.87		1.69348	1.6	1.64674	0.0648397
P51149	48	K	Ras-related protein Rab-7a	RAB7A	1.363	1.532		0.89	0.87	0.9	1.53146	1.76092		1.64619	0.156611
P78371	431	K	T-complex protein 1 subunit beta	CCT2	1.498			0.91	0.9	0.92	1.64615			1.64615
O43660	180	K	Pleiotropic regulator 1	PLRG1			1.432	0.88	0.9	0.87			1.64598	1.64598
P23921	292	K	Ribonucleoside-diphosphate reductase large subunit	RRM1		1.451	1.445	0.89	0.89	0.87		1.63034	1.66092	1.64563	0.0213154
Q15185	65	K	Prostaglandin E synthase 3	PTGES3	1.507	1.54	1.592	0.94	0.91	0.97	1.60319	1.69231	1.64124	1.64558	0.00239027
Q9BQG0	161	K	Myb-binding protein 1A	MYBBP1A	1.483		0.533	0.61	0.64	0.62	2.43115		0.859677	1.64541	0.66501
P53985	462	K	Monocarboxylate transporter 1	SLC16A1			1.316	0.77	0.6	0.8			1.645	1.645
P27797	238	K	Calreticulin	CALR	2.13	1.987	2.116	1.26	1.27	1.26	1.69048	1.56457	1.67937	1.6448	0.00579288
Q9BYC9	111	K	39S ribosomal protein L20, mitochondrial	MRPL20			1.299		0.83	0.79			1.6443	1.6443
P36578	239	K	60S ribosomal protein L4	RPL4	1.541		1.35	0.87	0.89	0.89	1.77126		1.51685	1.64406	0.173398
P42766	66	K	60S ribosomal protein L35	RPL35	1.39	1.231	1.223	0.79	0.81	0.74	1.75949	1.51975	1.6527	1.64398	0.0169516
P13639	337	K	Elongation factor 2	EEF2	1.934	1.775	1.782	1.12	1.12	1.1	1.72679	1.58482	1.62	1.64387	0.00652765
P46783	138	K	40S ribosomal protein S10	RPS10	1.575	1.585	1.604	0.97	0.99	0.94	1.62371	1.60101	1.70638	1.6437	0.00369076
P12268	181	K	Inosine-5'-monophosphate dehydrogenase 2	IMPDH2	1.736	1.587	2.139	1.11	1.13	1.09	1.56396	1.40442	1.96239	1.64359	0.0868934
Q16850	156	K	Lanosterol 14-alpha demethylase	CYP51A1		1.512		0.9	0.92			1.64348		1.64348
Q01469	50	K	Fatty acid-binding protein, epidermal	FABP5		1.064	1.219	0.7	0.7	0.69		1.52	1.76667	1.64333	0.168548
O00231	304	K	26S proteasome non-ATPase regulatory subunit 11	PSMD11		1.381	1.671	0.93	0.94	0.92		1.46915	1.8163	1.64273	0.232259
P30040	204	K	Endoplasmic reticulum resident protein 29	ERP29	1.452	1.356		0.85	0.86	0.85	1.70824	1.57674		1.64249	0.0914936
P04406	186	K	Glyceraldehyde-3-phosphate dehydrogenase	GAPDH		1.626		1	0.99	0.99		1.64242		1.64242
P62847	21	K	40S ribosomal protein S24	RPS24	1.479	1.475	1.447	0.9	0.88	0.9	1.64333	1.67614	1.60778	1.64242	0.00141311
Q96AG4	116	K	Leucine-rich repeat-containing protein 59	LRRC59	1.579	1.505	1.663	0.98	0.94	0.97	1.61122	1.60106	1.71443	1.64224	0.00473571
O15067	737	K	Phosphoribosylformylglycinamidine synthase	PFAS	1.389	1.37	1.389	0.81	0.83	0.89	1.71481	1.6506	1.56067	1.64203	0.00719346
P13639	330	K	Elongation factor 2	EEF2	1.867	1.797	1.819	1.12	1.12	1.1	1.66696	1.60446	1.65364	1.64169	0.00131325
P36578	333	K	60S ribosomal protein L4	RPL4	1.479	1.409		0.87	0.89	0.89	1.7	1.58315		1.64157	0.0815414
P84095	116	K	Rho-related GTP-binding protein RhoG	RHOG	1.773	1.832	1.69	1.05	1.07	1.11	1.68857	1.71215	1.52252	1.64108	0.0127466
Q14204	1526	K	Cytoplasmic dynein 1 heavy chain 1	DYNC1H1		1.559		0.95	0.95	0.95		1.64105		1.64105
O94874	289	K	E3 UFM1-protein ligase 1	UFL1			1.411	0.77	0.83	0.86			1.6407	1.6407
P00558	291	K	Phosphoglycerate kinase 1	PGK1	1.881	1.599	1.67	1.05	1.05	1.04	1.79143	1.52286	1.60577	1.64002	0.0223153
P18621	27	K	60S ribosomal protein L17	RPL17	1.443			0.88	0.89	0.89	1.63977			1.63977
Q9NT62	271	K	Ubiquitin-like-conjugating enzyme ATG3	ATG3		2.173	2.184	1.5	1.3	1.36		1.67154	1.60588	1.63871	0.0461927
O94826	359	K	Mitochondrial import receptor subunit TOM70	TOMM70A		1.851		1.1	1.13	1.18		1.63805		1.63805
Q99615	359	K	DnaJ homolog subfamily C member 7	DNAJC7		1.212		0.69	0.74	0.72		1.63784		1.63784
Q8TC12	77	K	Retinol dehydrogenase 11	RDH11	0.748		0.857	0.49	0.5	0.49	1.52653		1.74898	1.63776	0.153943
P40429	188	K	60S ribosomal protein L13a	RPL13A	1.373	1.595	1.423	0.86	0.92	0.9	1.59651	1.7337	1.58111	1.63711	0.00858054
Q9Y5M8	199	K	Signal recognition particle receptor subunit beta	SRPRB		1.293		0.77	0.79	0.77		1.63671		1.63671
P07900	585	K	Heat shock protein HSP 90-alpha	HSP90AA1	2.003	2.06	1.973	1.2	1.28	1.21	1.66917	1.60938	1.63058	1.63637	0.00113266
Q9Y281	19	K	Cofilin-2	CFL2	1.643	1.622	1.642	1.02	0.99	0.99	1.61078	1.63838	1.65859	1.63592	0.000711183
P55145	45	K	Mesencephalic astrocyte-derived neurotrophic factor	MANF	1.502	1.718	1.752	1.05	1.04	0.96	1.43048	1.65192	1.825	1.6358	0.0451224
Q15738	38	K	Sterol-4-alpha-carboxylate 3-dehydrogenase, decarboxylating	NSDHL	1.215	1.254	1.271	0.78	0.78	0.73	1.55769	1.60769	1.7411	1.63549	0.0109466
P46779	58	K	60S ribosomal protein L28	RPL28	1.364	1.245	1.448	0.85	0.8	0.83	1.60471	1.55625	1.74458	1.63518	0.0116452
P62820	140	K	Ras-related protein Rab-1A	RAB1A	1.627		1.448	0.95	0.92	0.93	1.71263		1.55699	1.63481	0.109283
P49207	43	K	60S ribosomal protein L34	RPL34	1.293	1.4	1.211	0.79	0.79	0.81	1.63671	1.77215	1.49506	1.63464	0.023013
P06748	273	K	Nucleophosmin	NPM1	1.342		1.289	0.8	0.8	0.81	1.6775		1.59136	1.63443	0.0609351
P62826	71	K	GTP-binding nuclear protein Ran	RAN	2.386	1.365	0.806	0.92	0.94	0.94	2.59348	1.45213	0.857447	1.63435	0.41622
P68371	58	K	Tubulin beta-4B chain	TUBB4B	2.228	1.681	2.282	1.26	1.27	1.26	1.76825	1.32362	1.81111	1.63433	0.0798479
Q92598	272	K	Heat shock protein 105 kDa	HSPH1			1.34	0.82	0.82	0.82			1.63415	1.63415
Q9Y2Q9	133	K	28S ribosomal protein S28, mitochondrial	MRPS28		1.294	1.438	0.81	0.88	0.8		1.47045	1.7975	1.63398	0.222672
P46940	1458	K	Ras GTPase-activating-like protein IQGAP1	IQGAP1	1.99	1.649	1.933	1.13	1.13	1.15	1.76106	1.45929	1.68087	1.63374	0.0290954
P41250	93	K	Glycine--tRNA ligase	GARS	1.465	1.49	1.604	0.93	0.92	0.94	1.57527	1.61957	1.70638	1.63374	0.00549242
P62917	156	K	60S ribosomal protein L8	RPL8	1.497	1.277		0.84	0.86	0.85	1.78214	1.48488		1.63351	0.203949
P84098	80	K	60S ribosomal protein L19	RPL19	1.3	1.349	1.336	0.82	0.82	0.8	1.58537	1.64512	1.67	1.6335	0.00234907
Q14204	4441	K	Cytoplasmic dynein 1 heavy chain 1	DYNC1H1	1.624	1.555	1.476	0.95	0.95	0.95	1.70947	1.63684	1.55368	1.63333	0.00748999
Q07866	68	K	Kinesin light chain 1	KLC1	1.91			1.17	1.22	1.19	1.63248			1.63248
P55060	839	K	Exportin-2	CSE1L		1.882	1.48	1.02	1.03	1.03		1.82718	1.43689	1.63204	0.262092
P17676	275	K	CCAAT/enhancer-binding protein beta	CEBPB	1.3	1.418		0.77	0.9	0.77	1.68831	1.57556		1.63193	0.0798997
Q9NS86	134	K	LanC-like protein 2	LANCL2		1.126		0.81	0.69	0.62		1.63188		1.63188
P30040	112	K	Endoplasmic reticulum resident protein 29	ERP29	1.303	1.716	1.162	0.85	0.86	0.85	1.53294	1.99535	1.36706	1.63178	0.111103
P13639	439	K	Elongation factor 2	EEF2	1.828	1.78	1.841	1.12	1.12	1.1	1.63214	1.58929	1.67364	1.63169	0.00222162
Q8NFJ5	290	K	Retinoic acid-induced protein 3	GPRC5A	6.178	5.105	5.657	3.65	3.39	3.34	1.6926	1.5059	1.69371	1.63074	0.0143747
Q9Y617	323	K	Phosphoserine aminotransferase	PSAT1	1.072	1.031		0.66	0.63	0.64	1.62424	1.63651		1.63038	0.00875839
O14737	97	K	Programmed cell death protein 5	PDCD5	1.777			1.09	1.06	1.1	1.63028			1.63028
O95373	182	K	Importin-7	IPO7	1.165		1.657	0.86	0.86	0.87	1.35465		1.9046	1.62962	0.352227
P16989	90	K	Y-box-binding protein 3	YBX3	0.952	1.198	0.963	0.64	0.64	0.63	1.4875	1.87187	1.52857	1.62932	0.0519024
Q09666	5767	K	Neuroblast differentiation-associated protein AHNAK	AHNAK	1.985	1.561	1.276	0.99	0.98	0.99	2.00505	1.59286	1.28889	1.62893	0.131787
P63241	68	K	Eukaryotic translation initiation factor 5A-1	EIF5A	1.565	1.582	1.544	0.96	0.96	0.96	1.63021	1.64792	1.60833	1.62882	0.000496776
P39019	122	K	40S ribosomal protein S19	RPS19	1.434	1.563		0.92	0.92	0.91	1.5587	1.69891		1.6288	0.0995613
P07900	224	K	Heat shock protein HSP 90-alpha	HSP90AA1	1.691	2.251	2.079	1.2	1.28	1.21	1.40917	1.75859	1.71818	1.62865	0.0432496
Q6Y7W6	1185	K	PERQ amino acid-rich with GYF domain-containing protein 2	GIGYF2		2.045	1.698	1.14	1.09	1.23		1.87615	1.38049	1.62832	0.323926
Q13283	5	K	Ras GTPase-activating protein-binding protein 1	G3BP1	1.626	1.602	1.607	0.98	1	0.99	1.65918	1.602	1.62323	1.62814	0.00105716
Q14157	53	K	Ubiquitin-associated protein 2-like	UBAP2L	1.282	1.09	1.662	0.81	0.84	0.83	1.58272	1.29762	2.00241	1.62758	0.129325
P07195	319	K	L-lactate dehydrogenase B chain	LDHB		1.562		0.97	0.96	0.99		1.62708		1.62708
O00194	154	K	Ras-related protein Rab-27B	RAB27B	0.732			0.45	0.41	0.44	1.62667			1.62667
P39023	362	K	60S ribosomal protein L3	RPL3	1.58	1.46	1.354	0.92	0.9	0.88	1.71739	1.62222	1.53864	1.62608	0.0100504
P60842	174	K	Eukaryotic initiation factor 4A-I	EIF4A1		1.56	1.561	0.94	0.95	0.97		1.64211	1.60928	1.62569	0.0236067
P36578	353	K	60S ribosomal protein L4	RPL4	1.5	1.366	1.44	0.87	0.89	0.89	1.72414	1.53483	1.61798	1.62565	0.0113058
P33991	806	K	DNA replication licensing factor MCM4	MCM4	1.362	1.239		0.8	0.8	0.8	1.7025	1.54875		1.62563	0.109534
P15170	71	K	Eukaryotic peptide chain release factor GTP-binding subunit ERF3A	GSPT1	1.593			0.98	0.98	1	1.62551			1.62551
P62917	46	K	60S ribosomal protein L8	RPL8	1.285	1.378	1.482	0.84	0.86	0.85	1.52976	1.60233	1.74353	1.62521	0.0147812
P14324	123	K	Farnesyl pyrophosphate synthase	FDPS		1.053	1.088	0.7	0.63	0.69		1.67143	1.57681	1.62412	0.0679846
Q13151	176	K	Heterogeneous nuclear ribonucleoprotein A0	HNRNPA0			1.429	0.88	0.87	0.88			1.62386	1.62386
P00492	103	K	Hypoxanthine-guanine phosphoribosyltransferase	HPRT1	1.534	1.513	1.744	0.99	0.97	0.99	1.54949	1.55979	1.76162	1.62363	0.0178991
P31939	356	K	Bifunctional purine biosynthesis protein PURH	ATIC		1.461		0.94	0.9	0.95		1.62333		1.62333
Q96AG4	108	K	Leucine-rich repeat-containing protein 59	LRRC59	1.651		1.515	0.98	0.94	0.97	1.68469		1.56186	1.62327	0.0881517
P49411	361	K	Elongation factor Tu, mitochondrial	TUFM	1.331			0.82	0.85	0.83	1.62317			1.62317
P30622	1057	K	CAP-Gly domain-containing linker protein 1	CLIP1	0.915		1.067	0.58	0.6	0.64	1.57759		1.66719	1.62239	0.0645841
Q9GZR7	195	K	ATP-dependent RNA helicase DDX24	DDX24	1.408		1.366	0.86	0.88	0.85	1.63721		1.60706	1.62213	0.0218075
P41250	85	K	Glycine--tRNA ligase	GARS		1.497	1.52	0.93	0.92	0.94		1.62717	1.61702	1.6221	0.00734626
P62910	64	K	60S ribosomal protein L32	RPL32	1.552	1.525	1.323	0.92	0.91	0.88	1.68696	1.67582	1.50341	1.62206	0.013409
P61353	93	K	60S ribosomal protein L27	RPL27	1.299	1.329	1.36	0.84	0.81	0.81	1.54643	1.64074	1.67901	1.62206	0.0059628
Q9BQE3	370	K	Tubulin alpha-1B chain	TUBA1B	1.784			1.1	1.08	1.09	1.62182			1.62182
O94826	199	K	Mitochondrial import receptor subunit TOM70	TOMM70A			1.913	1.1	1.13	1.18			1.62119	1.62119
O76031	187	K	ATP-dependent Clp protease ATP-binding subunit clpX-like, mitochondrial	CLPX		1.621		0.98	1	0.98		1.621		1.621
P15880	211	K	40S ribosomal protein S2	RPS2	1.532	1.347	1.497	0.89	0.89	0.92	1.72135	1.51348	1.62717	1.62067	0.0137716
P62280	38	K	40S ribosomal protein S11	RPS11	1.471	1.327	1.381	0.87	0.84	0.87	1.6908	1.57976	1.58736	1.61931	0.00497933
Q9HAV7	58	K	GrpE protein homolog 1, mitochondrial	GRPEL1		1.894		1.13	1.17	1.09		1.6188		1.6188
P43034	53	K	Platelet-activating factor acetylhydrolase IB subunit alpha	PAFAH1B1	1.553	1.431	1.599	0.95	0.92	0.96	1.63474	1.55543	1.66563	1.6186	0.0041949
Q3ZCQ8	312	K	Mitochondrial import inner membrane translocase subunit TIM50	TIMM50			1.505	0.91	0.92	0.93			1.61828	1.61828
P26599	65	K	Polypyrimidine tract-binding protein 1	PTBP1		1.424		0.88	0.88	0.9		1.61818		1.61818
Q02878	237	K	60S ribosomal protein L6	RPL6	1.329	1.297	1.322	0.82	0.81	0.81	1.62073	1.60123	1.6321	1.61802	0.000318812
Q15286	121	K	Ras-related protein Rab-35	RAB35			1.44	0.87	0.93	0.89			1.61798	1.61798
P16402	169	K	Histone H1.3	HIST1H1D	1.472			0.91	0.9	0.88	1.61758			1.61758
P49588	19	K	Alanine--tRNA ligase, cytoplasmic	AARS	1.268	1.251	1.412	0.8	0.81	0.82	1.585	1.54444	1.72195	1.61713	0.0111682
Q01518	327	K	Adenylyl cyclase-associated protein 1	CAP1	2.07	2.062	2.108	1.27	1.29	1.3	1.62992	1.59845	1.62154	1.61664	0.00034912
Q8WU90	218	K	Zinc finger CCCH domain-containing protein 15	ZC3H15	1.84	1.668		1.09	1.08	1.18	1.68807	1.54444		1.61626	0.103982
Q9H501	736	K	ESF1 homolog	ESF1			1.422	0.84	0.87	0.88			1.61591	1.61591
Q1ED39	188	K	Lysine-rich nucleolar protein 1	KNOP1	1.015	0.962	1.277	0.66	0.66	0.69	1.53788	1.45758	1.85072	1.61539	0.0525196
P27824	137	K	Calnexin	CANX	1.696	1.6	1.25	0.95	0.94	0.92	1.78526	1.70213	1.3587	1.61536	0.0613705
O14530	116	K	Thioredoxin domain-containing protein 9	TXNDC9	1.504	1.483	1.403	0.84	1.03		1.79048	1.43981		1.61514	0.243936
O43837	135	K	Isocitrate dehydrogenase [NAD] subunit beta, mitochondrial	IDH3B		1.518		0.95	0.94	0.94		1.61489		1.61489
P38606	220	K	V-type proton ATPase catalytic subunit A	ATP6V1A	2.545	2.899	2.749	1.68	1.64	1.76	1.51488	1.76768	1.56193	1.61483	0.0230843
Q9BW27	540	K	Nuclear pore complex protein Nup85	NUP85	1.395	1.12		0.77	0.79	0.75	1.81169	1.41772		1.6147	0.270883
P17844	523	K	Probable ATP-dependent RNA helicase DDX5	DDX5	1.204	1.193	1.267	0.75	0.77	0.75	1.60533	1.54935	1.68933	1.61467	0.00650546
Q7L2H7	160	K	Eukaryotic translation initiation factor 3 subunit M	EIF3M	1.49	1.247	1.654	0.9	0.91	0.91	1.65556	1.37033	1.81758	1.61449	0.0616796
P47813	23	K	Eukaryotic translation initiation factor 1A, Y-chromosomal	EIF1AY	2.163			1.34	1.27	1.25	1.61418			1.61418
Q92621	1279	K	Nuclear pore complex protein Nup205	NUP205		1.275		0.76	0.79	0.77		1.61392		1.61392
P45973	102	K	Chromobox protein homolog 5	CBX5	1.437	1.245	1.219	0.8	0.8	0.82	1.79625	1.55625	1.48659	1.61303	0.0333652
Q92598	691	K	Heat shock protein 105 kDa	HSPH1	1.322			0.82	0.82	0.82	1.6122			1.6122
P04899	193	K	Guanine nucleotide-binding protein G(i) subunit alpha-2	GNAI2	1.87			1.16	1.15	1.6	1.61207			1.61207
P41250	501	K	Glycine--tRNA ligase	GARS	1.499			0.93	0.92	0.94	1.61183			1.61183
P61513	28	K	60S ribosomal protein L37a	RPL37A	1.119	1.567	1.48	0.91	0.85	0.84	1.22967	1.84353	1.7619	1.6117	0.121924
Q15149	3027	K	Plectin	PLEC		1.531			0.95	0.95		1.61158		1.61158
Q9BQG0	581	K	Myb-binding protein 1A	MYBBP1A	0.965		1.017	0.61	0.64	0.62	1.58197		1.64032	1.61114	0.0429184
Q9Y277	20	K	Voltage-dependent anion-selective channel protein 3	VDAC3			1.53	0.93	0.96	0.95			1.61053	1.61053
P11387	655	K	DNA topoisomerase 1	TOP1	1.385			0.86	0.92	0.87	1.61047			1.61047
Q02790	294	K	Peptidyl-prolyl cis-trans isomerase FKBP4	FKBP4	1.458	1.286	1.482	0.89	0.9	0.84	1.6382	1.42889	1.76429	1.61046	0.0364165
P42766	35	K	60S ribosomal protein L35	RPL35	1.23	1.307	1.229	0.79	0.81	0.74	1.55696	1.61358	1.66081	1.61045	0.00360776
O75683	124	K	Surfeit locus protein 6	SURF6	1.098	0.977	1.032	0.66	0.65	0.62	1.66364	1.50308	1.66452	1.61041	0.011397
P62851	94	K	40S ribosomal protein S25	RPS25		1.417		0.88	0.88	0.89		1.61023		1.61023
P05023	444	K	Sodium/potassium-transporting ATPase subunit alpha-1	ATP1A1	1.549	1.628	1.653	1	1.01	0.99	1.549	1.61188	1.6697	1.61019	0.00485792
P08133	607	K	Annexin A6	ANXA6	1.431	3.143		1.4	1.43	1.45	1.02214	2.1979		1.61002	0.597011
P14625	428	K	Endoplasmin	HSP90B1	1.384		2.242	1.12	1.13	1.13	1.23571		1.98407	1.60989	0.454958
P38159	217	K	RNA-binding motif protein, X chromosome	RBMX	1.093		1.368	0.77	0.75	0.76	1.41948		1.8	1.60974	0.264567
P13797	444	K	Plastin-3	PLS3	1.958	1.796	1.731	1.12	1.14	1.15	1.74821	1.57544	1.50522	1.60962	0.020398
Q9UJX3	107	K	Anaphase-promoting complex subunit 7	ANAPC7	1.338		1.754	1.02	1.05	0.92	1.31176		1.90652	1.60914	0.384683
Q99878	96	K	Histone H2A type 1-J	HIST1H2AJ		1.491	1.469	0.92	0.91	0.93		1.63846	1.57957	1.60902	0.0434625
O75475	39	K	PC4 and SFRS1-interacting protein	PSIP1	1.877	1.726	1.366	1.05	1.04	0.99	1.78762	1.65962	1.3798	1.60901	0.0539412
P10620	42	K	Microsomal glutathione S-transferase 1	MGST1	1.202	1.164	1.252	0.76	0.72	0.77	1.58158	1.61667	1.62597	1.60807	0.000740369
P20290	54	K	Transcription factor BTF3	BTF3	1.618	1.545	1.593	0.96	1.01	0.99	1.68542	1.5297	1.60909	1.60807	0.00809863
P09496	136	K	Clathrin light chain A	CLTA	1.463			0.91	0.93	0.97	1.60769			1.60769
P49207	19	K	60S ribosomal protein L34	RPL34	1.237	1.274	1.332	0.79	0.79	0.81	1.56582	1.61266	1.64444	1.60764	0.00211151
P50990	367	K	T-complex protein 1 subunit theta	CCT8	1.535	1.6	1.752	1.02	1	1.02	1.5049	1.6	1.71765	1.60752	0.0150401
P40227	58	K	T-complex protein 1 subunit zeta	CCT6A			1.575	0.97	0.97	0.98			1.60714	1.60714
Q9UJZ1	250	K	Stomatin-like protein 2, mitochondrial	STOML2		1.205		0.75	0.75	0.76		1.60667		1.60667
P78371	119	K	T-complex protein 1 subunit beta	CCT2	1.486	1.348	1.552	0.91	0.9	0.92	1.63297	1.49778	1.68696	1.6059	0.0126884
P31689	59	K	DnaJ homolog subfamily A member 1	DNAJA1	1.698	1.382	1.755	1	1	1.01	1.698	1.382	1.73762	1.60587	0.048038
Q92688	101	K	Acidic leucine-rich nuclear phosphoprotein 32 family member B	ANP32B	1.195	1.33	1.263	0.79	0.78	0.79	1.51266	1.70513	1.59873	1.60551	0.0124407
Q13813	310	K	Spectrin alpha chain, non-erythrocytic 1	SPTAN1		1.969	1.562	1.1	1.1	1.1		1.79	1.42	1.605	0.259843
P48960	730	K	CD97 antigen	CD97		1.218	1.151	0.7	0.79	0.69		1.54177	1.66812	1.60494	0.0933418
P62495	354	K	Eukaryotic peptide chain release factor subunit 1	ETF1	1.587	1.744	1.543	1.04	1	1	1.52596	1.744	1.543	1.60432	0.0195448
Q86V81	164	K	THO complex subunit 4	ALYREF	1.117	1.51	1.131	0.77	0.79	0.78	1.45065	1.91139	1.45	1.60401	0.0849262
Q14847	92	K	LIM and SH3 domain protein 1	LASP1	1.627	1.508	1.692	0.99	1.01	1.01	1.64343	1.49307	1.67525	1.60392	0.0127332
Q9BQE3	163	K	Tubulin alpha-1B chain	TUBA1B	1.764			1.1	1.08	1.09	1.60364			1.60364
P53621	598	K	Coatomer subunit alpha	COPA			1.956	1.19	1.18	1.22			1.60328	1.60328
P61158	240	K	Actin-related protein 3	ACTR3			1.539	0.98	1	0.96			1.60312	1.60312
P62917	149	K	60S ribosomal protein L8	RPL8	1.377	1.325	1.384	0.84	0.86	0.85	1.63929	1.5407	1.62824	1.60274	0.00399121
P63241	121	K	Eukaryotic translation initiation factor 5A-1	EIF5A	1.474	1.588	1.553	0.96	0.96	0.96	1.53542	1.65417	1.61771	1.60243	0.00505947
Q96I24	138	K	Far upstream element-binding protein 3	FUBP3	1.522			0.95	1	0.99	1.60211			1.60211
Q02878	218	K	60S ribosomal protein L6	RPL6	1.279	1.294	1.335	0.82	0.81	0.81	1.55976	1.59753	1.64815	1.60181	0.00270455
P38159	80	K	RNA-binding motif protein, X chromosome	RBMX	1.492	0.984	1.181	0.77	0.75	0.76	1.93766	1.312	1.55395	1.6012	0.11452
Q9Y266	267	K	Nuclear migration protein nudC	NUDC	1.628	1.51		0.98	0.98	0.98	1.66122	1.54082		1.60102	0.0895884
P11021	326	K	78 kDa glucose-regulated protein	HSPA5		1.857		1.15	1.16	1.14		1.60086		1.60086
P05141	199	K	ADP/ATP translocase 2	SLC25A5	1.763	1.46	1.644	1.05	1	0.99	1.67905	1.46	1.66061	1.59988	0.0198989
Q9BZG1	252	K	Ras-related protein Rab-34	RAB34	1.051		1.027	0.66	0.66	0.64	1.59242		1.60469	1.59856	0.00922223
P62701	16	K	40S ribosomal protein S4, X isoform	RPS4X	1.47			0.92	0.91	0.9	1.59783			1.59783
P23526	388	K	Adenosylhomocysteinase	AHCY	1.72	1.667		1.06	1.06	1.07	1.62264	1.57264		1.59764	0.0376174
P04406	139	K	Glyceraldehyde-3-phosphate dehydrogenase	GAPDH	1.562	1.632	1.566	1	0.99	0.99	1.562	1.64848	1.58182	1.59743	0.00286331
P55145	133	K	Mesencephalic astrocyte-derived neurotrophic factor	MANF	1.57	1.678	1.615	1.05	1.04	0.96	1.49524	1.61346	1.68229	1.597	0.0123251
Q16891	101	K	MICOS complex subunit MIC60	IMMT	1.22	1.48		0.84	0.85	0.84	1.45238	1.74118		1.59678	0.209891
O60610	520	K	Protein diaphanous homolog 1	DIAPH1			1.98	1.28	1.29	1.24			1.59677	1.59677
P17480	612	K	Nucleolar transcription factor 1	UBTF	0.91			0.57	0.54	0.51	1.59649			1.59649
Q00325	355	K	Phosphate carrier protein, mitochondrial	SLC25A3	1.469	1.399	1.569	0.96	0.89	0.93	1.53021	1.57191	1.6871	1.59641	0.00915515
P36578	364	K	60S ribosomal protein L4	RPL4	1.409	1.468	1.353	0.87	0.89	0.89	1.61954	1.64944	1.52022	1.5964	0.00637053
P02792	68	K	Ferritin light chain	FTL	0.975	1.149		0.66	0.67	0.65	1.47727	1.71493		1.5961	0.174929
P36578	374	K	60S ribosomal protein L4	RPL4	1.43	1.404	1.394	0.87	0.89	0.89	1.64368	1.57753	1.56629	1.59583	0.00245343
P46778	97	K	60S ribosomal protein L21	RPL21	1.269		1.315	0.82	0.83	0.8	1.54756		1.64375	1.59566	0.07238
P47813	29	K	Eukaryotic translation initiation factor 1A, Y-chromosomal	EIF1AY	2.138			1.34	1.27	1.25	1.59552			1.59552
P39687	68	K	Acidic leucine-rich nuclear phosphoprotein 32 family member A	ANP32A		1.563		0.84	0.98	0.91		1.5949		1.5949
P11717	481	K	Cation-independent mannose-6-phosphate receptor	IGF2R	1.927	1.357	1.403	0.98	0.99	0.97	1.96633	1.37071	1.44639	1.59448	0.122098
P17844	32	K	Probable ATP-dependent RNA helicase DDX5	DDX5	1.202	1.108	1.306	0.75	0.77	0.75	1.60267	1.43896	1.74133	1.59432	0.030933
P31947	140	K	14-3-3 protein sigma	SFN	1.943	1.897	1.834	1.18	1.18	1.2	1.64661	1.60763	1.52833	1.59419	0.00510529
P23528	45	K	Cofilin-1	CFL1	1.871	1.804	1.966	1.18	1.18	1.18	1.58559	1.52881	1.6661	1.5935	0.00668744
P30622	743	K	CAP-Gly domain-containing linker protein 1	CLIP1		0.956		0.58	0.6	0.64		1.59333		1.59333
P46734	80	K	Dual specificity mitogen-activated protein kinase kinase 3	MAP2K3	4.015			2.52	2.61	2.74	1.59325			1.59325
P35580	973	K	Myosin-10	MYH10		1.847		1.15	1.16	1.14		1.59224		1.59224
P17252	236	K	Protein kinase C alpha type	PRKCA			1.783	1.22	1.17	1.12			1.59196	1.59196
P60228	35	K	Eukaryotic translation initiation factor 3 subunit E	EIF3E	1.732	1.47	1.247	0.93	0.92	0.95	1.86237	1.59783	1.31263	1.59094	0.0933231
Q9Y617	190	K	Phosphoserine aminotransferase	PSAT1	1.05			0.66	0.63	0.64	1.59091			1.59091
Q6NZI2	326	K	Polymerase I and transcript release factor	PTRF	1.625	1.603	1.542	1	1.01	0.99	1.625	1.58713	1.55758	1.5899	0.00163724
O15144	286	K	Actin-related protein 2/3 complex subunit 2	ARPC2			1.558	0.96	0.99	0.98			1.5898	1.5898
Q9UNQ2	288	K	Probable dimethyladenosine transferase	DIMT1	0.922		0.906	0.58	0.67		1.58966			1.58966
P00338	222	K	L-lactate dehydrogenase A chain	LDHA	1.584	1.657	1.575	1.01	1.01	1.01	1.56832	1.64059	1.55941	1.58944	0.00284085
O15042	850	K	U2 snRNP-associated SURP motif-containing protein	U2SURP			1.335	0.81	0.85	0.84			1.58929	1.58929
P37108	74	K	Signal recognition particle 14 kDa protein	SRP14		1.621		1.05	1.02	1.09		1.58922		1.58922
P07900	478	K	Heat shock protein HSP 90-alpha	HSP90AA1	2.079	1.902	1.873	1.2	1.28	1.21	1.7325	1.48594	1.54793	1.58879	0.0229134
P11142	557	K	Heat shock cognate 71 kDa protein	HSPA8			1.366	0.87	0.86	0.86			1.58837	1.58837
O75347	28	K	Tubulin-specific chaperone A	TBCA	1.762		1.78	1.11	1.13	1.12	1.58739		1.58929	1.58834	0.00145248
O60841	644	K	Eukaryotic translation initiation factor 5B	EIF5B			1.842	1.12	1.17	1.16			1.58793	1.58793
P62191	232	K	26S protease regulatory subunit 4	PSMC1			1.54	1.04	1	0.97			1.58763	1.58763
Q9NX58	20	K	Cell growth-regulating nucleolar protein	LYAR			1.381	1.01	0.97	0.87			1.58736	1.58736
P62280	48	K	40S ribosomal protein S11	RPS11	1.304	1.358	1.432	0.87	0.84	0.87	1.49885	1.61667	1.64598	1.58716	0.00868057
Q96PK6	126	K	RNA-binding protein 14	RBM14			1.587	1.01	1.04	1			1.587	1.587
P78417	110	K	Glutathione S-transferase omega-1	GSTO1	1.466	1.514	1.447	0.92	0.94	0.93	1.59348	1.61064	1.55591	1.58668	0.00113607
P62913	169	K	60S ribosomal protein L11	RPL11	1.398	1.505	1.573	0.91	0.93	0.98	1.53626	1.61828	1.6051	1.58655	0.00280733
P62841	77	K	40S ribosomal protein S15	RPS15	1.704	1.519		1.04	0.99	1.01	1.63846	1.53434		1.5864	0.0795113
O60841	628	K	Eukaryotic translation initiation factor 5B	EIF5B		2.236	1.463	1.12	1.17	1.16		1.91111	1.26121	1.58616	0.423296
P62081	147	K	40S ribosomal protein S7	RPS7		1.459		0.92	0.92	0.91		1.58587		1.58587
P78371	176	K	T-complex protein 1 subunit beta	CCT2	1.504	1.46	1.364	0.91	0.9	0.92	1.65275	1.62222	1.48261	1.58586	0.0117755
P50416	639	K	Carnitine O-palmitoyltransferase 1, liver isoform	CPT1A		1.887		1.24	1.19	1.18		1.58571		1.58571
Q6DD88	386	K	Atlastin-3	ATL3		1.11		0.68	0.7	0.7		1.58571		1.58571
Q6DKI1	18	K	60S ribosomal protein L7-like 1	RPL7L1		1.136	1.227	0.74	0.74	0.75		1.53514	1.636	1.58557	0.0771603
Q9Y2W1	451	K	Thyroid hormone receptor-associated protein 3	THRAP3		1.633		1.04	1.03	0.99		1.58544		1.58544
Q01831	921	K	DNA repair protein complementing XP-C cells	XPC		1.268	1.258	0.9	0.8			1.585		1.585
P55884	257	K	Eukaryotic translation initiation factor 3 subunit B	EIF3B	1.493		1.691	1.01	1.01	1	1.47822		1.691	1.58461	0.160365
Q99878	37	K	Histone H2A type 1-J	HIST1H2AJ			1.473	0.92	0.91	0.93			1.58387	1.58387
P07900	631	K	Heat shock protein HSP 90-alpha	HSP90AA1	1.944	2.009	1.89	1.2	1.28	1.21	1.62	1.56953	1.56198	1.58384	0.00145632
P61313	47	K	60S ribosomal protein L15	RPL15		1.365	1.485	0.93	0.9	0.9		1.51667	1.65	1.58333	0.102011
P10599	3	K	Thioredoxin	TXN	1.891	1.863	1.865	1.17	1.17	1.21	1.61624	1.59231	1.54132	1.58329	0.00214478
Q9HB71	85	K	Calcyclin-binding protein	CACYBP	1.518	1.66	1.555	1.01	1.01	0.97	1.50297	1.64356	1.60309	1.58321	0.0076124
P55072	336	K	Transitional endoplasmic reticulum ATPase	VCP	1.696	1.262	1.286	0.9	0.89	0.89	1.88444	1.41798	1.44494	1.58246	0.0879454
P22059	402	K	Oxysterol-binding protein 1	OSBP	1.693			1.07	1.01	1.03	1.58224			1.58224
P07814	861	K	Bifunctional glutamate/proline--tRNA ligase	EPRS	1.492		1.704	1.01	1.03	1.01	1.47723		1.68713	1.58218	0.158917
P48163	351	K	NADP-dependent malic enzyme	ME1		1.234		0.8	0.78	0.79		1.58205		1.58205
P36578	368	K	60S ribosomal protein L4	RPL4	1.414	1.338	1.439	0.87	0.89	0.89	1.62529	1.50337	1.61685	1.58184	0.00677695
Q9H0S4	169	K	Probable ATP-dependent RNA helicase DDX47	DDX47		1.55		1.29	0.98	1		1.58163		1.58163
P07900	419	K	Heat shock protein HSP 90-alpha	HSP90AA1	2.098	1.811		1.2	1.28	1.21	1.74833	1.41484		1.58159	0.24523
P38646	76	K	Stress-70 protein, mitochondrial	HSPA9	1.189	1.337	1.222	0.79	0.79	0.79	1.50506	1.69241	1.54684	1.58143	0.0140052
P0CW22	59	K	40S ribosomal protein S17-like	RPS17L	1.664	1.469	1.35	0.92	0.97	0.95	1.8087	1.51443	1.42105	1.58139	0.0555469
P27816	870	K	Microtubule-associated protein 4	MAP4	1.619	1.717		1.06	1.05	1.08	1.52736	1.63524		1.5813	0.0830675
P62495	352	K	Eukaryotic peptide chain release factor subunit 1	ETF1	1.675	1.431	1.702	1.04	1	1	1.61058	1.431	1.702	1.58119	0.0270017
O15347	170	K	High mobility group protein B3	HMGB3	1.218	1.251	1.166	0.79	0.76	0.75	1.54177	1.64605	1.55467	1.58083	0.00475595
P61011	321	K	Signal recognition particle 54 kDa protein	SRP54	1.6	1.433	1.358	0.93	0.9	0.95	1.72043	1.59222	1.42947	1.58071	0.0301105
Q9Y6D9	406	K	Mitotic spindle assembly checkpoint protein MAD1	MAD1L1	1.549	1.802		0.98		0.89	1.58061			1.58061
A5YKK6	1181	K	CCR4-NOT transcription complex subunit 1	CNOT1		1.533		0.94	0.97	1		1.58041		1.58041
P04083	53	K	Annexin A1	ANXA1	1.994	2.036	1.909	1.24	1.25	1.27	1.60806	1.6288	1.50315	1.58	0.00667666
Q86U38	611	K	Nucleolar protein 9	NOP9	1.58			1	0.97	0.97	1.58			1.58
Q15061	491	K	WD repeat-containing protein 43	WDR43	1.301	1.195		0.79	0.79	0.78	1.64684	1.51266		1.57975	0.10327
Q96EK6	166	K	Glucosamine 6-phosphate N-acetyltransferase	GNPNAT1	1.523	1.478		0.97	0.93	0.94	1.5701	1.58925		1.57968	0.0148641
P46778	78	K	60S ribosomal protein L21	RPL21	1.172	1.472	1.229	0.82	0.83	0.8	1.42927	1.77349	1.53625	1.57967	0.0432118
P83881	97	K	60S ribosomal protein L36a	RPL36A	1.339	1.349	1.33	0.87	0.89	0.79	1.53908	1.51573	1.68354	1.57945	0.0120819
P55327	169	K	Tumor protein D52	TPD52			1.674	1.06	1.05	1.06			1.57925	1.57925
Q9Y512	72	K	Sorting and assembly machinery component 50 homolog	SAMM50	0.909		1.764	0.88	0.86	0.83	1.03295		2.1253	1.57913	0.590428
P06733	89	K	Alpha-enolase	ENO1	1.485	1.609	1.562	0.98	0.99	0.98	1.51531	1.62525	1.59388	1.57815	0.00476403
P62750	134	K	60S ribosomal protein L23a	RPL23A	1.436	1.434	1.456	0.91			1.57802			1.57802
O75940	142	K	Survival of motor neuron-related-splicing factor 30	SMNDC1	1.418	1.402	1.407	0.88	0.91	0.89	1.61136	1.54066	1.5809	1.57764	0.0018794
Q7KZF4	513	K	Staphylococcal nuclease domain-containing protein 1	SND1	1.815	2.159	2.005	1.26	1.27	1.26	1.44048	1.7	1.59127	1.57725	0.0245526
P18206	720	K	Vinculin	VCL	2.601			1.65	1.67	1.67	1.57636			1.57636
Q53GQ0	249	K	Estradiol 17-beta-dehydrogenase 12	HSD17B12	1.602	1.317	1.486	0.92	0.96	0.92	1.7413	1.37187	1.61522	1.57613	0.0492319
Q99426	153	K	Tubulin-folding cofactor B	TBCB	1.597	1.566	1.675	1.01	1.03	1.03	1.58119	1.52039	1.62621	1.57593	0.00422469
Q14498	305	K	RNA-binding protein 39	RBM39		1.006	1.025	0.67	0.66	0.63		1.52424	1.62698	1.57561	0.0799265
Q9BV81	7	K	ER membrane protein complex subunit 6	EMC6	1.292	1.53	1.375	0.82			1.57561			1.57561
P25685	209	K	DnaJ homolog subfamily B member 1	DNAJB1	3.206		2.871	1.91	1.98	1.95	1.67853		1.47231	1.57542	0.158007
Q15643	1108	K	Thyroid receptor-interacting protein 11	TRIP11	1.475	1.793	1.333	1.05	0.89	1.02	1.40476	2.01461	1.30686	1.57541	0.167873
Q15631	219	K	Translin	TSN	1.591			1.01	1.06	1.05	1.57525			1.57525
Q9HB71	19	K	Calcyclin-binding protein	CACYBP	1.674	1.492	1.543	1.01	1.01	0.97	1.65743	1.47723	1.59072	1.57513	0.0123156
Q99733	146	K	Nucleosome assembly protein 1-like 4	NAP1L4		1.701		1.01	1.08	1.05		1.575		1.575
P49368	15	K	T-complex protein 1 subunit gamma	CCT3	1.571	1.549	1.541	0.98	0.99	0.99	1.60306	1.56465	1.55657	1.57476	0.000932771
Q96PK6	600	K	RNA-binding protein 14	RBM14	1.716	1.519	1.564	1.01	1.04	1	1.69901	1.46058	1.564	1.57453	0.0209758
P53396	148	K	ATP-citrate synthase	ACLY		1.48		0.95	0.94	0.95		1.57447		1.57447
Q99471	124	K	Prefoldin subunit 5	PFDN5	1.511	1.542	1.416	0.92	0.98	0.94	1.64239	1.57347	1.50638	1.57408	0.00694351
Q9NVS9	100	K	Pyridoxine-5'-phosphate oxidase	PNPO	1.979	2.133	1.643	1.23	1.2	1.23	1.60894	1.7775	1.33577	1.57407	0.0678137
Q9Y3C1	138	K	Nucleolar protein 16	NOP16			1.133	0.69	0.68	0.72			1.57361	1.57361
P46940	968	K	Ras GTPase-activating-like protein IQGAP1	IQGAP1		1.778		1.13	1.13	1.15		1.57345		1.57345
Q08945	539	K	FACT complex subunit SSRP1	SSRP1	1.423	1.456	1.755	0.97	0.95	1.02	1.46701	1.53263	1.72059	1.57341	0.025345
P13639	438	K	Elongation factor 2	EEF2	1.854	1.663	1.737	1.12	1.12	1.1	1.65536	1.48482	1.57909	1.57309	0.010928
O75683	294	K	Surfeit locus protein 6	SURF6	0.982	0.88	1.164	0.66	0.65	0.62	1.48788	1.35385	1.87742	1.57305	0.0965888
Q96KC8	548	K	DnaJ homolog subfamily C member 1	DNAJC1	2.374	3.233	2.808	1.82	1.67	1.9	1.3044	1.93593	1.47789	1.57274	0.131101
P0CW22	49	K	40S ribosomal protein S17-like	RPS17L		1.525		0.92	0.97	0.95		1.57216		1.57216
Q9NUU7	460	K	ATP-dependent RNA helicase DDX19A	DDX19A	1.847		1.542	1.06	1.12	1.1	1.74245		1.40182	1.57214	0.253675
P07108	77	K	Acyl-CoA-binding protein	DBI	1.716	1.79	1.837	1.14	1.1	1.16	1.50526	1.62727	1.58362	1.57205	0.00578896
P15311	162	K	Ezrin	EZR	2.74	3.025	3.005	1.87	1.85	1.86	1.46524	1.63514	1.61559	1.57199	0.012951
P31948	442	K	Stress-induced-phosphoprotein 1	STIP1	1.723		1.579	1.06	1.05	1.04	1.62547		1.51827	1.57187	0.0838973
Q14847	23	K	LIM and SH3 domain protein 1	LASP1	1.542		1.602	0.99	1.01	1.01	1.55758		1.58614	1.57186	0.0224749
P29084	197	K	Transcription initiation factor IIE subunit beta	GTF2E2		1.854		1.14	1.18	1.18		1.57119		1.57119
P39019	38	K	40S ribosomal protein S19	RPS19	1.376	1.495	1.449	0.92	0.92	0.91	1.49565	1.625	1.59231	1.57099	0.00686621
Q9BY32	18	K	Inosine triphosphate pyrophosphatase	ITPA	1.492			0.95	0.96	0.92	1.57053			1.57053
Q9H583	735	K	HEAT repeat-containing protein 1	HEATR1	1.184		1.217	0.78	0.74	0.75	1.51795		1.62267	1.57031	0.0821967
Q9NQC3	1179	K	Reticulon-4	RTN4		1.202	1.502	0.88	0.85	0.87		1.41412	1.72644	1.57028	0.235213
Q13151	154	K	Heterogeneous nuclear ribonucleoprotein A0	HNRNPA0	1.358	1.388	1.383	0.88	0.87	0.88	1.54318	1.5954	1.57159	1.57006	0.00105
P55884	228	K	Eukaryotic translation initiation factor 3 subunit B	EIF3B	1.533	1.583	1.625	1.01	1.01	1	1.51782	1.56733	1.625	1.57005	0.0043981
O15372	180	K	Eukaryotic translation initiation factor 3 subunit H	EIF3H			1.46	0.93	0.94	0.93			1.56989	1.56989
Q00839	21	K	Heterogeneous nuclear ribonucleoprotein U	HNRNPU	1.389	1.461	1.514	0.93	0.92	0.93	1.49355	1.58804	1.62796	1.56985	0.00725664
P24534	186	K	Elongation factor 1-beta	EEF1B2			1.35	0.92	0.87	0.86			1.56977	1.56977
P35222	671	K	Catenin beta-1	CTNNB1		1.554		0.95	0.99	0.95		1.5697		1.5697
P30153	255	K	Serine/threonine-protein phosphatase 2A 65 kDa regulatory subunit A alpha isoform	PPP2R1A	1.491			0.95	0.93	0.94	1.56947			1.56947
P22234	36	K	Multifunctional protein ADE2	PAICS	1.538	1.422	1.603	0.95	0.99	0.97	1.61895	1.43636	1.65258	1.5693	0.0202504
Q01518	282	K	Adenylyl cyclase-associated protein 1	CAP1	2.175	1.988	1.89	1.27	1.29	1.3	1.7126	1.54109	1.45385	1.56918	0.0257196
Q16778	47	K	Histone H2B type 2-E	HIST2H2BE	1.441	1.412			0.9			1.56889		1.56889
Q99848	187	K	Probable rRNA-processing protein EBP2	EBNA1BP2	1.271	1.16	1.163	0.79	0.75	0.75	1.60886	1.54667	1.55067	1.56873	0.00186793
Q96A33	327	K	Coiled-coil domain-containing protein 47	CCDC47	1.517		1.571	1	1.06	0.97	1.517		1.61959	1.56829	0.0808249
P08047	693	K	Transcription factor Sp1	SP1		1.082		0.85	0.69	0.74		1.56812		1.56812
P41250	559	K	Glycine--tRNA ligase	GARS	1.574		1.357	0.93	0.92	0.94	1.69247		1.44362	1.56805	0.191243
P61158	254	K	Actin-related protein 3	ACTR3	1.536			0.98	1	0.96	1.56735			1.56735
P55145	123	K	Mesencephalic astrocyte-derived neurotrophic factor	MANF		1.63		1.05	1.04	0.96		1.56731		1.56731
P13693	97	K	Translationally-controlled tumor protein	TPT1	1.616		1.394	0.97	0.94	0.95	1.66598		1.46737	1.56667	0.154658
P62266	48	K	40S ribosomal protein S23	RPS23	1.572	1.498	1.532	1.02	0.97	0.95	1.54118	1.54433	1.61263	1.56605	0.0025342
Q9Y6G9	331	K	Cytoplasmic dynein 1 light intermediate chain 1	DYNC1LI1	1.485	1.431	1.374	0.91	0.92	0.91	1.63187	1.55543	1.50989	1.56573	0.00588292
Q9BQE3	96	K	Tubulin alpha-1B chain	TUBA1B	1.722			1.1	1.08	1.09	1.56545			1.56545
P60842	309	K	Eukaryotic initiation factor 4A-I	EIF4A1	1.457	1.61	1.408	0.94	0.95	0.97	1.55	1.69474	1.45155	1.56543	0.0226117
P25788	230	K	Proteasome subunit alpha type-3	PSMA3	1.53	1.427	1.441	0.93	0.94	0.94	1.64516	1.51809	1.53298	1.56541	0.00746339
P26639	583	K	Threonine--tRNA ligase, cytoplasmic	TARS	1.104	1.236	1.37	0.78	0.8	0.79	1.41538	1.545	1.73418	1.56485	0.037998
Q9NQC3	1104	K	Reticulon-4	RTN4	1.486		1.253	0.88	0.85	0.87	1.68864		1.44023	1.56443	0.192067
P40925	205	K	Malate dehydrogenase, cytoplasmic	MDH1	1.492	1.565	2.843	1.28	1.27	1.24	1.16562	1.23228	2.29274	1.56355	0.334689
Q9Y3A2	33	K	Probable U3 small nucleolar RNA-associated protein 11	UTP11L	1.157		1.075	0.74	0.75		1.56351			1.56351
P49588	74	K	Alanine--tRNA ligase, cytoplasmic	AARS			1.282	0.8	0.81	0.82			1.56341	1.56341
P15924	2393	K	Desmoplakin	DSP		2.852	3.199	1.93	1.93	1.94		1.47772	1.64897	1.56334	0.134791
P61353	107	K	60S ribosomal protein L27	RPL27	1.297	1.237	1.311	0.84	0.81	0.81	1.54405	1.52716	1.61852	1.56324	0.00370345
P14618	186	K	Pyruvate kinase PKM	PKM	1.581		1.639	1.03	1.03	1.03	1.53495		1.59126	1.56311	0.044941
P15927	139	K	Replication protein A 32 kDa subunit	RPA2	1.654		1.611	1.03	1.08	1.06	1.60583		1.51981	1.56282	0.0685305
P39023	385	K	60S ribosomal protein L3	RPL3	1.462	1.423	1.336	0.92	0.9	0.88	1.58913	1.58111	1.51818	1.56281	0.00237458
P12081	51	K	Histidine--tRNA ligase, cytoplasmic	HARS	1.976	1.935	2.043	1.27	1.27	1.27	1.55591	1.52362	1.60866	1.56273	0.00289714
P46776	55	K	60S ribosomal protein L27a	RPL27A	1.502	1.395	1.431	0.92	0.92	0.93	1.63261	1.5163	1.53871	1.56254	0.00596235
Q9NR33	90	K	DNA polymerase epsilon subunit 4	POLE4			1.25	0.72	0.76	0.8			1.5625	1.5625
Q9HAV7	127	K	GrpE protein homolog 1, mitochondrial	GRPEL1			1.703	1.13	1.17	1.09			1.56239	1.56239
P15880	58	K	40S ribosomal protein S2	RPS2	1.374	1.417	1.425	0.89	0.89	0.92	1.54382	1.59213	1.54891	1.56162	0.00111526
P16070	739	K	CD44 antigen	CD44	1.041	1.06	1.021	0.67	0.68	0.65	1.55373	1.55882	1.57077	1.56111	0.000121446
P15880	76	K	40S ribosomal protein S2	RPS2	1.357	1.421		0.89	0.89	0.92	1.52472	1.59663		1.56067	0.0575782
P62829	13	K	60S ribosomal protein L23	RPL23		1.467		0.94	0.94	0.96		1.56064		1.56064
Q16204	71	K	Coiled-coil domain-containing protein 6	CCDC6			1.935	1.38	1.22	1.24			1.56048	1.56048
P46781	139	K	40S ribosomal protein S9	RPS9			1.451	0.93	0.92	0.93			1.56022	1.56022
Q9BQG0	259	K	Myb-binding protein 1A	MYBBP1A	0.988	0.994	0.934	0.61	0.64	0.62	1.61967	1.55312	1.50645	1.55975	0.00512697
P62826	159	K	GTP-binding nuclear protein Ran	RAN		1.466		0.92	0.94	0.94		1.55957		1.55957
P60842	54	K	Eukaryotic initiation factor 4A-III	EIF4A3	1.35	1.561	1.551	0.94	0.95	0.97	1.43617	1.64316	1.59897	1.55943	0.018461
P61353	128	K	60S ribosomal protein L27	RPL27	1.336	1.229	1.272	0.84	0.81	0.81	1.59048	1.51728	1.57037	1.55938	0.00227713
P27348	80	K	14-3-3 protein theta	YWHAQ	2.045	2.075	2.008	1.3	1.32	1.31	1.57308	1.57197	1.53282	1.55929	0.000839145
O60264	490	K	SWI/SNF-related matrix-associated actin-dependent regulator of chromatin subfamily A member 5	SMARCA5	1.214	1.295	1.442	0.87	0.89	0.79	1.3954	1.45506	1.82532	1.55859	0.077018
Q9H583	1583	K	HEAT repeat-containing protein 1	HEATR1	1.14	1.116	1.279	0.78	0.74	0.75	1.46154	1.50811	1.70533	1.55833	0.0258305
Q96AG4	111	K	Leucine-rich repeat-containing protein 59	LRRC59	1.568		1.471	0.98	0.94	0.97	1.6		1.51649	1.55825	0.0670872
P20700	261	K	Lamin-B1	LMNB1	1.144	1.273	1.163	0.78	0.75	0.77	1.46667	1.69733	1.51039	1.55813	0.023257
O75369	1416	K	Filamin-B	FLNB		2.929		1.89	1.88	1.89		1.55798		1.55798
P33176	690	K	Kinesin-1 heavy chain	KIF5B	1.631	1.613	1.801	1.09	1.08	1.07	1.49633	1.49352	1.68318	1.55768	0.0184705
P48643	279	K	T-complex protein 1 subunit epsilon	CCT5	1.412		1.469	0.93	0.93	0.92	1.51828		1.59674	1.55751	0.0631439
Q8N806	398	K	Putative E3 ubiquitin-protein ligase UBR7	UBR7	1.978			1.27	1.74	1.49	1.55748			1.55748
P05388	10	K	60S acidic ribosomal protein P0	RPLP0		1.575	1.555	0.99	1.02	0.99		1.54412	1.57071	1.55741	0.0214651
Q53S33	106	K	BolA-like protein 3	BOLA3	1.277		1.163	0.82	1.11		1.55732			1.55732
Q8WUM4	620	K	Programmed cell death 6-interacting protein	PDCD6IP	1.774	2.068	1.808	1.2	1.2	1.23	1.47833	1.72333	1.46992	1.5572	0.0317854
Q15233	272	K	Non-POU domain-containing octamer-binding protein	NONO	1.566	1.347		0.94	0.93	0.93	1.66596	1.44839		1.55717	0.171509
P36578	172	K	60S ribosomal protein L4	RPL4	1.361	1.407	1.358	0.87	0.89	0.89	1.56437	1.5809	1.52584	1.55704	0.00128359
Q9BRJ6	14	K	Uncharacterized protein C7orf50	C7orf50			1.79	1.29	1.17	1.15			1.55652	1.55652
P49915	182	K	GMP synthase [glutamine-hydrolyzing]	GMPS	1.211	1.706	1.354	0.93	0.9	0.92	1.30215	1.89556	1.47174	1.55648	0.123504
P54577	26	K	Tyrosine--tRNA ligase, cytoplasmic	YARS		1.463		0.91	0.94	0.92		1.55638		1.55638
P62241	37	K	40S ribosomal protein S8	RPS8	1.443	1.441	1.411	0.92	0.92	0.92	1.56848	1.5663	1.5337	1.55616	0.000613129
Q15084	245	K	Protein disulfide-isomerase A6	PDIA6	1.802	1.29	1.398	0.95	0.97	0.97	1.89684	1.3299	1.44124	1.55599	0.120196
Q53T59	69	K	HCLS1-binding protein 3	HS1BP3	2.085			1.34	1.45	1.36	1.55597			1.55597
Q00610	742	K	Clathrin heavy chain 1	CLTC	1.587			1.02	1.03	1.02	1.55588			1.55588
P61247	56	K	40S ribosomal protein S3a	RPS3A	1.274	1.588	1.435	0.91	0.93	0.92	1.4	1.70753	1.55978	1.55577	0.0362241
O75223	181	K	Gamma-glutamylcyclotransferase	GGCT	1.812		1.824	1.13	1.24	1.21	1.60354		1.50744	1.55549	0.0774941
P22392	56	K	Nucleoside diphosphate kinase B	NME2	1.464	1.564	1.523	1.01	0.97	0.95	1.4495	1.61237	1.60316	1.55501	0.0133151
P55010	308	K	Eukaryotic translation initiation factor 5	EIF5	1.836	1.832	1.843	1.25	1.16	1.14	1.4688	1.57931	1.61667	1.55493	0.00946331
P11142	357	K	Heat shock cognate 71 kDa protein	HSPA8	1.547	1.145		0.87	0.86	0.86	1.77816	1.3314		1.55478	0.329542
P23284	195	K	Peptidyl-prolyl cis-trans isomerase B	PPIB	1.42		1.439	0.94	0.89	0.9	1.51064		1.59889	1.55476	0.0713104
Q96AG4	73	K	Leucine-rich repeat-containing protein 59	LRRC59	1.461	1.538	1.488	0.98	0.94	0.97	1.49082	1.63617	1.53402	1.55367	0.00896539
O15226	523	K	NF-kappa-B-repressing factor	NKRF	1.405	1.387	1.248	0.91	0.86	0.83	1.54396	1.61279	1.50361	1.55345	0.00493773
P43034	33	K	Platelet-activating factor acetylhydrolase IB subunit alpha	PAFAH1B1	1.601	1.307		0.95	0.92	0.96	1.68526	1.42065		1.55296	0.207718
Q9C037	247	K	Tripartite motif-containing protein 4	TRIM4	1.422	1.392	1.556	0.86	0.89	1.08	1.65349	1.56404	1.44074	1.55276	0.018166
Q15005	71	K	Signal peptidase complex subunit 2	SPCS2	1.176	1.104	1.083	0.7	0.72	0.75	1.68	1.53333	1.444	1.55244	0.0224791
P46977	3	K	Dolichyl-diphosphooligosaccharide--protein glycosyltransferase subunit STT3A	STT3A	1.304			0.84	0.85	0.83	1.55238			1.55238
P46777	85	K	60S ribosomal protein L5	RPL5		1.428		0.94	0.92	0.92		1.55217		1.55217
P30040	253	K	Endoplasmic reticulum resident protein 29	ERP29	1.157	1.483	1.335	0.85	0.86	0.85	1.36118	1.72442	1.57059	1.55206	0.0504473
P23528	112	K	Cofilin-1	CFL1	1.91	1.629	1.955	1.18	1.18	1.18	1.61864	1.38051	1.65678	1.55198	0.0348715
P18621	49	K	60S ribosomal protein L17	RPL17	1.39	1.39	1.346	0.88	0.89	0.89	1.57955	1.5618	1.51236	1.55123	0.00198869
P39748	354	K	Flap endonuclease 1	FEN1	1.603		1.393	0.98	0.94	0.95	1.63571		1.46632	1.55102	0.136272
P15121	222	K	Aldose reductase	AKR1B1			1.488	0.96	0.96	0.96			1.55	1.55
Q86V81	161	K	THO complex subunit 4	ALYREF	1.194	1.205	1.227	0.77	0.79	0.78	1.55065	1.52532	1.57308	1.54968	0.000943509
P53396	1080	K	ATP-citrate synthase	ACLY	1.472			0.95	0.94	0.95	1.54947			1.54947
O60287	185	K	Nucleolar pre-ribosomal-associated protein 1	URB1	1.119	1.244	1.241	0.77	0.71	0.86	1.45325	1.75211	1.44302	1.54946	0.0474494
P62424	107	K	60S ribosomal protein L7a	RPL7A	1.283	1.336	1.332	0.85	0.85	0.85	1.50941	1.57176	1.56706	1.54941	0.00199093
P55010	114	K	Eukaryotic translation initiation factor 5	EIF5	1.759	2.005	1.723	1.25	1.16	1.14	1.4072	1.72845	1.5114	1.54902	0.0417849
P04406	145	K	Glyceraldehyde-3-phosphate dehydrogenase	GAPDH		1.66	1.407	1	0.99	0.99		1.67677	1.42121	1.54899	0.202438
P04075	101	K	Fructose-bisphosphate aldolase A	ALDOA	1.547	1.524	1.607	1.01	1	1.01	1.53168	1.524	1.59109	1.54892	0.00222965
P55327	102	K	Tumor protein D52	TPD52	1.682	1.741	1.485	1.06	1.05	1.06	1.58679	1.6581	1.40094	1.54861	0.028054
P17858	713	K	ATP-dependent 6-phosphofructokinase, liver type	PFKL			1.409	0.93	0.96	0.91			1.54835	1.54835
P17844	56	K	Probable ATP-dependent RNA helicase DDX5	DDX5	1.391	0.99	1.128	0.75	0.77	0.75	1.85467	1.28571	1.504	1.54813	0.114114
O00541	315	K	Pescadillo homolog	PES1		1.192		0.78	0.77	0.74		1.54805		1.54805
P49368	427	K	T-complex protein 1 subunit gamma	CCT3	1.517			0.98	0.99	0.99	1.54796			1.54796
Q9H2P0	716	K	Activity-dependent neuroprotector homeobox protein	ADNP	0.944			0.61	0.55	0.6	1.54754			1.54754
Q99729	232	K	Heterogeneous nuclear ribonucleoprotein A/B	HNRNPAB	0.999	0.941	1.157	0.65	0.71	0.65	1.53692	1.32535	1.78	1.54743	0.0765713
P06733	71	K	Alpha-enolase	ENO1	1.468	1.463	1.633	0.98	0.99	0.98	1.49796	1.47778	1.66633	1.54735	0.0174206
P63104	11	K	14-3-3 protein zeta/delta	YWHAZ	1.759	2.143	1.532	1.16	1.18	1.17	1.51638	1.8161	1.3094	1.54729	0.0934089
P22392	128	K	Nucleoside diphosphate kinase B	NME2	1.603	1.418	1.513	1.01	0.97	0.95	1.58713	1.46186	1.59263	1.54721	0.00901226
Q9BQG0	125	K	Myb-binding protein 1A	MYBBP1A	0.986	0.968	0.936	0.61	0.64	0.62	1.61639	1.5125	1.50968	1.54619	0.00614151
Q14974	835	K	Importin subunit beta-1	KPNB1	1.061	1.099	1.039	0.69	0.69	0.69	1.53768	1.59275	1.5058	1.54541	0.0032369
Q9NZL9	168	K	Methionine adenosyltransferase 2 subunit beta	MAT2B		1.638		1.07	1.06	1.08		1.54528		1.54528
Q00610	764	K	Clathrin heavy chain 1	CLTC	1.576			1.02	1.03	1.02	1.5451			1.5451
O75533	213	K	Splicing factor 3B subunit 1	SF3B1	1.414	1.341	1.616	0.94	0.95	0.94	1.50426	1.41158	1.71915	1.54499	0.0394445
Q9HD45	116	K	Transmembrane 9 superfamily member 3	TM9SF3	1.205			0.78	0.84	0.75	1.54487			1.54487
Q8NEF9	226	K	Serum response factor-binding protein 1	SRFBP1			1.174	0.71	0.99	0.76			1.54474	1.54474
P22694	267	K	cAMP-dependent protein kinase catalytic subunit beta	PRKACB			1.745			1.13			1.54425	1.54425
P51608	210	K	Methyl-CpG-binding protein 2	MECP2	1.032		1.178	0.69	0.62	0.74	1.49565		1.59189	1.54377	0.0792594
P31948	530	K	Stress-induced-phosphoprotein 1	STIP1	1.586	1.439	1.834	1.06	1.05	1.04	1.49623	1.37048	1.76346	1.54339	0.0619355
P06753	234	K	Tropomyosin alpha-3 chain	TPM3	1.999	1.898	1.849	1.23	1.31	1.19	1.6252	1.44885	1.55378	1.54261	0.0130999
P46782	18	K	40S ribosomal protein S5	RPS5	1.521	1.517		1	0.97	0.97	1.521	1.56392		1.54246	0.0355779
P30405	86	K	Peptidyl-prolyl cis-trans isomerase F, mitochondrial	PPIF		0.941	1.012	0.61	0.66	0.61		1.42576	1.65902	1.54239	0.187938
P04075	330	K	Fructose-bisphosphate aldolase A	ALDOA	1.605	1.51	1.543	1.01	1	1.01	1.58911	1.51	1.52772	1.54228	0.00291754
Q16778	35	K	Histone H2B type 2-E	HIST2H2BE	1.413	1.388			0.9			1.54222		1.54222
P23588	223	K	Eukaryotic translation initiation factor 4B	EIF4B	1.076		1.339	0.8		0.77	1.345		1.73896	1.54198	0.302252
P13693	19	K	Translationally-controlled tumor protein	TPT1	1.484		1.476	0.97	0.94	0.95	1.5299		1.55368	1.54179	0.0197578
Q8TDD1	748	K	ATP-dependent RNA helicase DDX54	DDX54	0.695	0.825	0.853	0.51	0.53	0.5	1.36275	1.5566	1.706	1.54178	0.0469326
O95470	91	K	Sphingosine-1-phosphate lyase 1	SGPL1		1.263		0.8	0.82	0.77		1.54024		1.54024
P68104	386	K	Elongation factor 1-alpha 1	EEF1A1	1.372	1.408	1.423	0.92	0.9	0.91	1.4913	1.56444	1.56374	1.53983	0.00301645
P48426	252	K	Phosphatidylinositol 5-phosphate 4-kinase type-2 alpha	PIP4K2A			2.032			1.32			1.53939	1.53939
Q92522	19	K	Histone H1x	H1FX		1.878		1.21	1.22	1.25		1.53934		1.53934
P07900	632	K	Heat shock protein HSP 90-alpha	HSP90AA1	1.886	1.949	1.843	1.2	1.28	1.21	1.57167	1.52266	1.52314	1.53915	0.00136095
P62266	25	K	40S ribosomal protein S23	RPS23	1.372	1.547	1.593	1.02	0.97	0.95	1.3451	1.59485	1.67684	1.53893	0.04775
O76021	120	K	Ribosomal L1 domain-containing protein 1	RSL1D1	1.045	1.09	1.095	0.7	0.69	0.71	1.49286	1.57971	1.54225	1.53827	0.00325892
P62851	57	K	40S ribosomal protein S25	RPS25			1.369	0.88	0.88	0.89			1.5382	1.5382
P52788	186	K	Spermine synthase	SMS	1.204	1.906	1.33	0.98	0.94	0.98	1.22857	2.02766	1.35714	1.53779	0.218315
P62841	72	K	40S ribosomal protein S15	RPS15	1.573	1.566	1.532	1.04	0.99	1.01	1.5125	1.58182	1.51683	1.53705	0.00260373
Q14151	541	K	Scaffold attachment factor B2	SAFB2			1.414	0.96	1.02	0.92			1.53696	1.53696
P25685	35	K	DnaJ homolog subfamily B member 1	DNAJB1			2.996	1.91	1.98	1.95			1.53641	1.53641
P39019	77	K	40S ribosomal protein S19	RPS19	1.338	1.441	1.445	0.92	0.92	0.91	1.45435	1.5663	1.58791	1.53619	0.00882126
P62917	144	K	60S ribosomal protein L8	RPL8	1.301	1.308	1.308	0.84	0.86	0.85	1.54881	1.52093	1.53882	1.53619	0.000346821
P30048	166	K	Thioredoxin-dependent peroxide reductase, mitochondrial	PRDX3			1.413	1	0.93	0.92			1.53587	1.53587
Q14204	3480	K	Cytoplasmic dynein 1 heavy chain 1	DYNC1H1		1.459		0.95	0.95	0.95		1.53579		1.53579
Q15287	174	K	RNA-binding protein with serine-rich domain 1	RNPS1			1.259	0.88	0.86	0.82			1.53537	1.53537
P35580	1394	K	Myosin-10	MYH10		1.781		1.15	1.16	1.14		1.53534		1.53534
P78371	203	K	T-complex protein 1 subunit beta	CCT2	1.397	1.393	1.401	0.91	0.9	0.92	1.53516	1.54778	1.52283	1.53526	0.000271536
Q14254	160	K	Flotillin-2	FLOT2		1.351		0.82	0.88	0.9		1.53523		1.53523
P50991	65	K	T-complex protein 1 subunit delta	CCT4	1.414	1.416	1.499	0.94	0.94	0.94	1.50426	1.50638	1.59468	1.53511	0.00461785
P62701	134	K	40S ribosomal protein S4, X isoform	RPS4X	1.412			0.92	0.91	0.9	1.53478			1.53478
P05023	625	K	Sodium/potassium-transporting ATPase subunit alpha-1	ATP1A1		1.55		1	1.01	0.99		1.53465		1.53465
P31153	350	K	S-adenosylmethionine synthase isoform type-2	MAT2A	1.302	1.167		0.8	0.81	0.83	1.6275	1.44074		1.53412	0.154307
P42224	138	K	Signal transducer and activator of transcription 1-alpha/beta	STAT1		2.608		1.72	1.7	1.75		1.53412		1.53412
P23526	4	K	Adenosylhomocysteinase	AHCY		1.626		1.06	1.06	1.07		1.53396		1.53396
P00558	11	K	Phosphoglycerate kinase 1	PGK1	1.838	1.383		1.05	1.05	1.04	1.75048	1.31714		1.53381	0.331737
P49588	934	K	Alanine--tRNA ligase, cytoplasmic	AARS	1.262	1.246	1.217	0.8	0.81	0.82	1.5775	1.53827	1.48415	1.53331	0.00384046
P33176	685	K	Kinesin-1 heavy chain	KIF5B	1.689	1.463	1.814	1.09	1.08	1.07	1.54954	1.35463	1.69533	1.53317	0.0477444
P07900	499	K	Heat shock protein HSP 90-alpha	HSP90AA1	1.836	1.888	1.929	1.2	1.28	1.21	1.53	1.475	1.59421	1.53307	0.00620592
Q6P2Q9	746	K	Pre-mRNA-processing-splicing factor 8	PRPF8	1.303			0.85	0.85	0.84	1.53294			1.53294
P61026	56	K	Ras-related protein Rab-10	RAB10	1.336	1.531	1.316	0.93	0.91	0.89	1.43656	1.68242	1.47865	1.53254	0.0291559
P09936	71	K	Ubiquitin carboxyl-terminal hydrolase isozyme L1	UCHL1	1.793			1.17	1.15	1.18	1.53248			1.53248
P05026	13	K	Sodium/potassium-transporting ATPase subunit beta-1	ATP1B1		1.992		1.24	1.3	1.27		1.53231		1.53231
P60842	291	K	Eukaryotic initiation factor 4A-I	EIF4A1	1.354	1.585	1.443	0.94	0.95	0.97	1.44043	1.66842	1.48763	1.53216	0.0246296
P06744	454	K	Glucose-6-phosphate isomerase	GPI	1.524	1.757	1.867	1.12	1.12	1.12	1.36071	1.56875	1.66696	1.53214	0.0405661
Q01813	395	K	ATP-dependent 6-phosphofructokinase, platelet type	PFKP	1.724	1.576	1.665	1.09	1.07	1.08	1.58165	1.4729	1.54167	1.53207	0.00530178
Q99613	493	K	Eukaryotic translation initiation factor 3 subunit C	EIF3C		1.294	1.62	0.97	0.94	0.96		1.3766	1.6875	1.53205	0.249449
P49840	148	K	Glycogen synthase kinase-3 alpha	GSK3A		1.363		1.07	0.89	0.96		1.53146		1.53146
P30566	147	K	Adenylosuccinate lyase	ADSL	1.82		1.494	1.11	1.04	1.05	1.63964		1.42286	1.53125	0.178835
O43707	323	K	Alpha-actinin-4	ACTN4	1.718	1.789	1.714	1.14	1.13	1.14	1.50702	1.58319	1.50351	1.53124	0.00357213
P52815	173	K	39S ribosomal protein L12, mitochondrial	MRPL12	1.279		0.987	0.74	0.71	0.74	1.72838		1.33378	1.53108	0.307963
P62273	33	K	40S ribosomal protein S29	RPS29	1.139	1.126		0.73	0.75	0.78	1.56027	1.50133		1.5308	0.0498834
O95793	299	K	Double-stranded RNA-binding protein Staufen homolog 1	STAU1	2.296			1.5	1.42	1.52	1.53067			1.53067
Q00610	245	K	Clathrin heavy chain 1	CLTC	1.569	1.61	1.52	1.02	1.03	1.02	1.53824	1.56311	1.4902	1.53051	0.00243159
P12081	257	K	Histidine--tRNA ligase, cytoplasmic	HARS	1.831	1.996	2.004	1.27	1.27	1.27	1.44173	1.57165	1.57795	1.53045	0.0103438
Q9ULV4	391	K	Coronin-1C	CORO1C	2.525	1.763		1.41	1.39	1.37	1.79078	1.26835		1.52956	0.387769
Q13601	121	K	KRR1 small subunit processome component homolog	KRR1	1.104		1.022	0.71	0.7	0.68	1.55493		1.50294	1.52894	0.0441745
Q7L1Q6	60	K	Basic leucine zipper and W2 domain-containing protein 1	BZW1	1.651			1.08	1.02	1.06	1.5287			1.5287
P61353	133	K	60S ribosomal protein L27	RPL27	1.274	1.167	1.318	0.84	0.81	0.81	1.51667	1.44074	1.62716	1.52819	0.0153868
Q03701	781	K	CCAAT/enhancer-binding protein zeta	CEBPZ	1.208	1.426	1.52	0.91	0.87	0.94	1.32747	1.63908	1.61702	1.52786	0.0502087
P23246	516	K	Splicing factor, proline- and glutamine-rich	SFPQ	1.446	1.336	1.369	0.89	0.93	0.9	1.62472	1.43656	1.52111	1.52746	0.0155888
P48643	513	K	T-complex protein 1 subunit epsilon	CCT5	1.459	1.4	1.387	0.93	0.93	0.92	1.56882	1.50538	1.50761	1.52727	0.00232279
P27816	1007	K	Microtubule-associated protein 4	MAP4			1.649	1.06	1.05	1.08			1.52685	1.52685
Q9H3P2	190	K	Negative elongation factor A	NELFA		2.23	1.313	0.81		0.86			1.52674	1.52674
P61513	13	K	60S ribosomal protein L37a	RPL37A	1.355	1.333	1.279	0.91	0.85	0.84	1.48901	1.56824	1.52262	1.52662	0.00283851
Q13765	82	K	Nascent polypeptide-associated complex subunit alpha	NACA	1.496			0.98		0.94	1.52653			1.52653
Q02241	586	K	Kinesin-like protein KIF23	KIF23		1.267		0.64	0.83	0.79		1.52651		1.52651
Q9Y6G9	175	K	Cytoplasmic dynein 1 light intermediate chain 1	DYNC1LI1	1.477	1.317	1.387	0.91	0.92	0.91	1.62308	1.43152	1.52418	1.52626	0.0161667
P36578	294	K	60S ribosomal protein L4	RPL4	1.366	1.38	1.297	0.87	0.89	0.89	1.57011	1.55056	1.4573	1.52599	0.00650398
P51991	118	K	Heterogeneous nuclear ribonucleoprotein A3	HNRNPA3		1.266		0.84	0.83	0.86		1.5253		1.5253
P10620	55	K	Microsomal glutathione S-transferase 1	MGST1		1.122	1.149	0.76	0.72	0.77		1.55833	1.49221	1.52527	0.0565208
O14907	53	K	Tax1-binding protein 3	TAX1BP3			1.571	1.03	1.05	1.03			1.52524	1.52524
O43707	125	K	Alpha-actinin-4	ACTN4	1.824	1.7	1.677	1.14	1.13	1.14	1.6	1.50442	1.47105	1.52516	0.00802317
P13639	619	K	Elongation factor 2	EEF2	1.731	1.693	1.67	1.12	1.12	1.1	1.54554	1.51161	1.51818	1.52511	0.000586576
Q13151	99	K	Heterogeneous nuclear ribonucleoprotein A0	HNRNPA0	1.25	1.433	1.325	0.88	0.87	0.88	1.42045	1.64713	1.50568	1.52442	0.0230125
P24534	7	K	Elongation factor 1-beta	EEF1B2		1.837	0.806	0.92	0.87	0.86		2.11149	0.937209	1.52435	0.641424
P62910	93	K	60S ribosomal protein L32	RPL32		1.387		0.92	0.91	0.88		1.52418		1.52418
Q9BVG9	160	K	Phosphatidylserine synthase 2	PTDSS2		1.204		0.77	0.79			1.52405		1.52405
Q12846	267	K	Syntaxin-4	STX4	1.235	1.25	1.116	0.77	0.77	0.83	1.6039	1.62338	1.34458	1.52395	0.0414021
P61353	59	K	60S ribosomal protein L27	RPL27	1.239	1.24	1.267	0.84	0.81	0.81	1.475	1.53086	1.5642	1.52335	0.00368771
P26583	141	K	High mobility group protein B2	HMGB2	1.226	1.506		0.87	0.92	0.86	1.4092	1.63696		1.52308	0.190147
P08195	166	K	4F2 cell-surface antigen heavy chain	SLC3A2	1.067	0.982	0.982	0.67	0.66	0.66	1.59254	1.48788	1.48788	1.52276	0.00661393
P83881	30	K	60S ribosomal protein L36a	RPL36A	1.421	1.34	1.129	0.87	0.89	0.79	1.63333	1.50562	1.42911	1.52269	0.0189303
P39023	366	K	60S ribosomal protein L3	RPL3	1.379	1.346	1.383	0.92	0.9	0.88	1.49891	1.49556	1.57159	1.52202	0.0033696
Q9H2U1	152	K	ATP-dependent RNA helicase DHX36	DHX36		1.385		0.96	0.91	0.93		1.52198		1.52198
Q15691	212	K	Microtubule-associated protein RP/EB family member 1	MAPRE1	1.673	1.634	1.652	1.1	1.09	1.07	1.52091	1.49908	1.54393	1.52131	0.000923863
P08195	257	K	4F2 cell-surface antigen heavy chain	SLC3A2		0.974	1.034	0.67	0.66	0.66		1.47576	1.56667	1.52121	0.0781215
O75369	551	K	Filamin-B	FLNB	2.455	2.612	3.544	1.89	1.88	1.89	1.29894	1.38936	1.87513	1.52115	0.140469
P06733	80	K	Alpha-enolase	ENO1	1.505	1.487	1.495	0.98	0.99	0.98	1.53571	1.50202	1.52551	1.52108	0.000549278
P05455	328	K	Lupus La protein	SSB			1.901	1.27	1.24	1.25			1.5208	1.5208
Q9NVA2	326	K	Septin-11	SEPT11		1.536		1.01	1.01	1.01		1.52079		1.52079
Q86V81	134	K	THO complex subunit 4	ALYREF	1.723	1.094	0.733	0.77	0.79	0.78	2.23766	1.38481	0.939744	1.52074	0.380325
Q14247	226	K	Src substrate cortactin	CTTN	1.274	1.363	1.377	0.88	0.89	0.87	1.44773	1.53146	1.58276	1.52065	0.00846104
P11021	547	K	78 kDa glucose-regulated protein	HSPA5	1.795	1.681	1.769	1.15	1.16	1.14	1.56087	1.44914	1.55175	1.52059	0.00702739
P13639	272	K	Elongation factor 2	EEF2	1.703			1.12	1.12	1.1	1.52054			1.52054
O94808	58	K	Glutamine--fructose-6-phosphate aminotransferase [isomerizing] 2	GFPT2	2.176	2.3	2.312	1.53	1.5	1.44	1.42222	1.53333	1.60556	1.52037	0.0153858
P30566	170	K	Adenylosuccinate lyase	ADSL			1.596	1.11	1.04	1.05			1.52	1.52
Q99615	155	K	DnaJ homolog subfamily C member 7	DNAJC7		1.119	1.1	0.69	0.74	0.72		1.51216	1.52778	1.51997	0.013517
O43395	376	K	U4/U6 small nuclear ribonucleoprotein Prp3	PRPF3	1.432	1.394	1.606	1	0.97	0.95	1.432	1.43711	1.69053	1.51988	0.0381197
P39019	29	K	40S ribosomal protein S19	RPS19	1.41	1.36	1.409	0.92	0.92	0.91	1.53261	1.47826	1.54835	1.51974	0.00249383
P49736	492	K	DNA replication licensing factor MCM2	MCM2	1.462	0.997	1.136	0.78	0.8	0.79	1.87436	1.24625	1.43797	1.51953	0.149944
Q13813	63	K	Spectrin alpha chain, non-erythrocytic 1	SPTAN1	1.652	1.57	1.792	1.1	1.1	1.1	1.50182	1.42727	1.62909	1.51939	0.0187608
P52815	162	K	39S ribosomal protein L12, mitochondrial	MRPL12	0.962	1.114	1.249	0.74	0.71	0.74	1.3	1.56901	1.68784	1.51895	0.0661189
P08240	344	K	Signal recognition particle receptor subunit alpha	SRPR	1.236	1.049	1.046	0.76	0.72	0.71	1.62632	1.45694	1.47324	1.51883	0.0158327
P39748	314	K	Flap endonuclease 1	FEN1	1.379	1.491	1.484	0.98	0.94	0.95	1.40714	1.58617	1.56211	1.51847	0.0171102
Q13435	519	K	Splicing factor 3B subunit 2	SF3B2			1.321	0.9	0.93	0.87			1.51839	1.51839
Q96C19	123	K	EF-hand domain-containing protein D2	EFHD2		1.461	1.905	1.08	1.12	1.1		1.30446	1.73182	1.51814	0.336124
Q13740	572	K	CD166 antigen	ALCAM	1.493		1.573	1.01	0.96	1.01	1.47822		1.55743	1.51782	0.0685912
P61160	106	K	Actin-related protein 2	ACTR2	1.548			1.02	1.04	1.05	1.51765			1.51765
P14618	224	K	Pyruvate kinase PKM	PKM	1.53	1.546	1.612	1.03	1.03	1.03	1.48544	1.50097	1.56505	1.51715	0.00331288
O75369	6	K	Filamin-B	FLNB	3.03		2.704	1.89	1.88	1.89	1.60317		1.43069	1.51693	0.147509
O00571	66	K	ATP-dependent RNA helicase DDX3X	DDX3X		1.441		0.9	0.95	0.93		1.51684		1.51684
P05023	661	K	Sodium/potassium-transporting ATPase subunit alpha-1	ATP1A1		1.532		1	1.01	0.99		1.51683		1.51683
P21281	64	K	V-type proton ATPase subunit B, brain isoform	ATP6V1B2			2.093	1.44	1.42	1.38			1.51667	1.51667
P48449	506	K	Lanosterol synthase	LSS		1.665	1.67	1.06	1.12	1.08		1.48661	1.5463	1.51645	0.0519119
Q15056	123	K	Eukaryotic translation initiation factor 4H	EIF4H	2.05	1.927	1.921	1.29	1.3	1.3	1.58915	1.48231	1.47769	1.51638	0.00737377
P02794	72	K	Ferritin heavy chain	FTH1			0.849	0.54	0.51	0.56			1.51607	1.51607
Q14498	178	K	RNA-binding protein 39	RBM39			0.955	0.67	0.66	0.63			1.51587	1.51587
P11940	259	K	Polyadenylate-binding protein 1	PABPC1	1.604	1.162	1.561	0.94	0.97	0.95	1.70638	1.19794	1.64316	1.51583	0.11907
P62917	60	K	60S ribosomal protein L8	RPL8	1.31	1.25	1.303	0.84	0.86	0.85	1.55952	1.45349	1.53294	1.51532	0.0056823
P05026	21	K	Sodium/potassium-transporting ATPase subunit beta-1	ATP1B1	1.91	1.944	1.918	1.24	1.3	1.27	1.54032	1.49538	1.51024	1.51531	0.000985547
P08670	188	K	Vimentin	VIM	1.321	1.268	1.244	0.84	0.84	0.85	1.57262	1.50952	1.46353	1.51522	0.0056023
P26038	327	K	Moesin	MSN	1.528	1.594	1.605	1.04	1.05	1.03	1.46923	1.5181	1.55825	1.51519	0.00372318
P00558	388	K	Phosphoglycerate kinase 1	PGK1	1.89	1.547	1.323	1.05	1.05	1.04	1.8	1.47333	1.27212	1.51515	0.111753
O15347	125	K	High mobility group protein B3	HMGB3	1.174	1.173		0.79	0.76	0.75	1.48608	1.54342		1.51475	0.0500461
Q15084	102	K	Protein disulfide-isomerase A6	PDIA6	1.439			0.95	0.97	0.97	1.51474			1.51474
Q9Y277	63	K	Voltage-dependent anion-selective channel protein 3	VDAC3	1.493	1.611	1.197	0.93	0.96	0.95	1.60538	1.67813	1.26	1.5145	0.0827276
P63244	172	K	Guanine nucleotide-binding protein subunit beta-2-like 1	GNB2L1	1.499	1.484		0.98	0.99	0.99	1.52959	1.49899		1.51429	0.02677
P20290	57	K	Transcription factor BTF3	BTF3	1.475	1.513	1.493	0.96	1.01	0.99	1.53646	1.49802	1.50808	1.51419	0.000750585
P13639	283	K	Elongation factor 2	EEF2	1.727		1.635	1.12	1.12	1.1	1.54196		1.48636	1.51416	0.0485846
P61247	46	K	40S ribosomal protein S3a	RPS3A	1.529	1.399	1.249	0.91	0.93	0.92	1.68022	1.5043	1.35761	1.51404	0.0459901
P55327	137	K	Tumor protein D52	TPD52	1.508	1.817	1.472	1.06	1.05	1.06	1.42264	1.73048	1.38868	1.51393	0.0610398
P63241	67	K	Eukaryotic translation initiation factor 5A-1	EIF5A	1.419	1.496	1.445	0.96	0.96	0.96	1.47813	1.55833	1.50521	1.51389	0.00313734
P08865	40	K	40S ribosomal protein SA	RPSA	1.422	1.314	1.953	1.02	1.05	1.03	1.39412	1.25143	1.89612	1.51389	0.164984
P04075	322	K	Fructose-bisphosphate aldolase A	ALDOA	1.552	1.52	1.499	1.01	1	1.01	1.53663	1.52	1.48416	1.5136	0.00136039
P21796	224	K	Voltage-dependent anion-selective channel protein 1	VDAC1	1.226			0.81	0.82	0.82	1.51358			1.51358
P23528	30	K	Cofilin-1	CFL1		1.805	1.767	1.18	1.18	1.18		1.52966	1.49746	1.51356	0.0282093
Q969X6	428	K	Cirhin	CIRH1A			1.241	0.74	0.83	0.82			1.51341	1.51341
Q56VL3	146	K	OCIA domain-containing protein 2	OCIAD2	1.294	1.386	1.251	0.89	0.85	0.86	1.45393	1.63059	1.45465	1.51306	0.0191168
Q96D46	405	K	60S ribosomal export protein NMD3	NMD3	1.654	1.702		1.07	1.15	0.99	1.54579	1.48		1.5129	0.0575886
P15880	257	K	40S ribosomal protein S2	RPS2	1.31	1.406	1.367	0.89	0.89	0.92	1.47191	1.57978	1.48587	1.51252	0.0064869
Q8TEA8	165	K	D-tyrosyl-tRNA(Tyr) deacylase 1	DTD1	1.496		1.482	1.01	1.04	0.96	1.48119		1.54375	1.51247	0.0548191
Q2TB90	102	K	Putative hexokinase HKDC1	HKDC1		1.043		0.7	0.69	0.68		1.51159		1.51159
P52565	127	K	Rho GDP-dissociation inhibitor 1	ARHGDIA			1.617	1.11	1.06	1.07			1.51121	1.51121
P11142	524	K	Heat shock cognate 71 kDa protein	HSPA8	1.355	1.282	1.277	0.87	0.86	0.86	1.55747	1.4907	1.48488	1.51102	0.00310055
P33176	679	K	Kinesin-1 heavy chain	KIF5B	1.554	1.744	1.597	1.09	1.08	1.07	1.42569	1.61481	1.49252	1.51101	0.0171608
P25205	314	K	DNA replication licensing factor MCM3	MCM3		1.292	1.186	0.83	0.83	0.81		1.55663	1.4642	1.51041	0.0810766
P18124	223	K	60S ribosomal protein L7	RPL7	1.493	1.253	1.407	0.92	0.92	0.91	1.62283	1.36196	1.54615	1.51031	0.032825
P29692	15	K	Elongation factor 1-delta	EEF1D	1.272	1.614		0.99	0.93	0.98	1.28485	1.73548		1.51017	0.35543
P68104	392	K	Elongation factor 1-alpha 1	EEF1A1	1.406	1.407	1.309	0.92	0.9	0.91	1.52826	1.56333	1.43846	1.51002	0.00787884
Q99832	47	K	T-complex protein 1 subunit eta	CCT7	1.501	1.452	1.425	0.97	0.95	0.98	1.54742	1.52842	1.45408	1.50998	0.00464556
Q13428	1335	K	Treacle protein	TCOF1	1.096	1.04	1.184	0.73	0.73	0.74	1.50137	1.42466	1.6	1.50868	0.0146037
P62277	34	K	40S ribosomal protein S13	RPS13	1.337	1.4	1.395	0.92	0.91	0.91	1.45326	1.53846	1.53297	1.50823	0.00437254
P53396	159	K	ATP-citrate synthase	ACLY	1.49	1.33	1.464	0.95	0.94	0.95	1.56842	1.41489	1.54105	1.50812	0.012739
Q9H3N1	107	K	Thioredoxin-related transmembrane protein 1	TMX1		1.402	1.302	0.92	0.86	0.94		1.63023	1.38511	1.50767	0.209457
Q96AG4	135	K	Leucine-rich repeat-containing protein 59	LRRC59	1.489	1.299	1.573	0.98	0.94	0.97	1.51939	1.38191	1.62165	1.50765	0.0269474
P30405	182	K	Peptidyl-prolyl cis-trans isomerase F, mitochondrial	PPIF		0.995		0.61	0.66	0.61		1.50758		1.50758
O95163	484	K	Elongator complex protein 1	IKBKAP	2.08			1.38	1.41	1.46	1.50725			1.50725
Q7RTV0	95	K	PHD finger-like domain-containing protein 5A	PHF5A	1.296			0.86	0.85	0.91	1.50698			1.50698
Q9Y266	308	K	Nuclear migration protein nudC	NUDC	1.386	1.549	1.495	0.98	0.98	0.98	1.41429	1.58061	1.52551	1.5068	0.0136881
Q96AG4	149	K	Leucine-rich repeat-containing protein 59	LRRC59	1.48	1.342	1.534	0.98	0.94	0.97	1.5102	1.42766	1.58144	1.50644	0.0113506
P12270	1571	K	Nucleoprotein TPR	TPR	1.4	1.619	1.619	1.03	1.04	1.01	1.35922	1.55673	1.60297	1.50631	0.0311696
O15355	539	K	Protein phosphatase 1G	PPM1G			2.018	1.28	1.35	1.34			1.50597	1.50597
Q9H501	55	K	ESF1 homolog	ESF1		1.509	1.124	0.84	0.87	0.88		1.73448	1.27727	1.50588	0.36202
P07195	318	K	L-lactate dehydrogenase B chain	LDHB	1.473	1.46	1.463	0.97	0.96	0.99	1.51856	1.52083	1.47778	1.50572	0.00114557
P35241	71	K	Radixin	RDX			1.611	1.07	1.12	1.07			1.50561	1.50561
P14314	487	K	Glucosidase 2 subunit beta	PRKCSH	1.415			0.94	0.92	0.91	1.50532			1.50532
P06748	248	K	Nucleophosmin	NPM1	1.116	1.329	1.182	0.8	0.8	0.81	1.395	1.66125	1.45926	1.50517	0.0358014
P38646	143	K	Stress-70 protein, mitochondrial	HSPA9	1.189			0.79	0.79	0.79	1.50506			1.50506
P48729	16	K	Casein kinase I isoform alpha	CSNK1A1			1.58	0.92	1.1	1.05			1.50476	1.50476
P12004	13	K	Proliferating cell nuclear antigen	PCNA	1.562	1.545	1.45	1	1.01	1.02	1.562	1.5297	1.42157	1.50442	0.0104635
P07108	67	K	Acyl-CoA-binding protein	DBI			1.745	1.14	1.1	1.16			1.50431	1.50431
P11940	229	K	Polyadenylate-binding protein 1	PABPC1	1.414			0.94	0.97	0.95	1.50426			1.50426
P39023	120	K	60S ribosomal protein L3	RPL3	1.408	1.389	1.266	0.92	0.9	0.88	1.53043	1.54333	1.43864	1.50413	0.00635076
P30405	91	K	Peptidyl-prolyl cis-trans isomerase F, mitochondrial	PPIF	0.878		0.957	0.61	0.66	0.61	1.43934		1.56885	1.5041	0.114403
P11142	56	K	Heat shock cognate 71 kDa protein	HSPA8	1.359	1.38	1.157	0.87	0.86	0.86	1.56207	1.60465	1.34535	1.50402	0.0360146
P00338	318	K	L-lactate dehydrogenase A chain	LDHA	1.519			1.01	1.01	1.01	1.50396			1.50396
P40227	287	K	T-complex protein 1 subunit zeta	CCT6A	1.458	1.436	1.497	0.97	0.97	0.98	1.50309	1.48041	1.52755	1.50369	0.00109355
P51153	55	K	Ras-related protein Rab-13	RAB13	0.996		1.416	0.82	0.86	0.79	1.21463		1.79241	1.50352	0.433946
P06748	250	K	Nucleophosmin	NPM1	1.284	1.125	1.214	0.8	0.8	0.81	1.605	1.40625	1.49877	1.50334	0.018967
P22234	11	K	Multifunctional protein ADE2	PAICS	1.45	1.443	1.48	0.95	0.99	0.97	1.52632	1.45758	1.52577	1.50322	0.00307136
P62424	48	K	60S ribosomal protein L7a	RPL7A	1.299	1.264	1.27	0.85	0.85	0.85	1.52824	1.48706	1.49412	1.50314	0.000956351
P53396	166	K	ATP-citrate synthase	ACLY	1.417	1.428	1.423	0.95	0.94	0.95	1.49158	1.51915	1.49789	1.50287	0.000412234
P62424	101	K	60S ribosomal protein L7a	RPL7A	1.176	1.34	1.316	0.85	0.85	0.85	1.38353	1.57647	1.54824	1.50275	0.0208124
P07900	458	K	Heat shock protein HSP 90-alpha	HSP90AA1	1.784	1.926	1.835	1.2	1.28	1.21	1.48667	1.50469	1.51653	1.50263	0.000447225
P42167	401	K	Lamina-associated polypeptide 2, isoforms beta/gamma	TMPO	1.196	1.268		0.8	0.84	0.78	1.495	1.50952		1.50226	0.0130153
Q15393	137	K	Splicing factor 3B subunit 3	SF3B3	1.352			0.9	0.9	0.92	1.50222			1.50222
P48643	226	K	T-complex protein 1 subunit epsilon	CCT5	1.367	1.422	1.387	0.93	0.93	0.92	1.46989	1.52903	1.50761	1.50218	0.00177276
P11387	347	K	DNA topoisomerase 1	TOP1	1.278	1.291	1.406	0.86	0.92	0.87	1.48605	1.40326	1.61609	1.5018	0.0221011
P62280	58	K	40S ribosomal protein S11	RPS11	1.236	1.249	1.39	0.87	0.84	0.87	1.42069	1.4869	1.5977	1.50177	0.0155167
P51114	56	K	Fragile X mental retardation syndrome-related protein 1	FXR1	1.649	1.729		1.13	1.12	1.13	1.45929	1.54375		1.50152	0.075453
P07237	366	K	Protein disulfide-isomerase	P4HB	1.508	1.518	1.628	1.03	1.04	1.03	1.46408	1.45962	1.58058	1.50143	0.0092261
P04075	14	K	Fructose-bisphosphate aldolase A	ALDOA	1.503	1.526	1.505	1.01	1	1.01	1.48812	1.526	1.4901	1.50141	0.000902946
Q01518	312	K	Adenylyl cyclase-associated protein 1	CAP1	1.901	2.102	1.791	1.27	1.29	1.3	1.49685	1.62946	1.37769	1.50133	0.0301354
P53396	272	K	ATP-citrate synthase	ACLY			1.426	0.95	0.94	0.95			1.50105	1.50105
P23246	319	K	Splicing factor, proline- and glutamine-rich	SFPQ	1.195	1.135	1.746	0.89	0.93	0.9	1.3427	1.22043	1.94	1.50104	0.207082
Q9BVL2	312	K	Nucleoporin p58/p45	NUPL1	1.178	1.145	1.133	0.75	0.8		1.57067	1.43125		1.50096	0.123698
Q9UBQ5	13	K	Eukaryotic translation initiation factor 3 subunit K	EIF3K	1.576			1.05	1.03	1.04	1.50095			1.50095
P14314	459	K	Glucosidase 2 subunit beta	PRKCSH	1.66	1.425	1.08	0.94	0.92	0.91	1.76596	1.54891	1.18681	1.50056	0.136664
P35580	1461	K	Myosin-10	MYH10	1.974	1.49		1.15	1.16	1.14	1.71652	1.28448		1.5005	0.348879
P04083	29	K	Annexin A1	ANXA1	1.847	1.93	1.864	1.24	1.25	1.27	1.48952	1.544	1.46772	1.50041	0.00306838
P36578	181	K	60S ribosomal protein L4	RPL4	1.352		1.287	0.87	0.89	0.89	1.55402		1.44607	1.50005	0.0964408
Q9GZR7	720	K	ATP-dependent RNA helicase DDX24	DDX24		1.32		0.86	0.88	0.85		1.5		1.5
Q02790	274	K	Peptidyl-prolyl cis-trans isomerase FKBP4	FKBP4	1.369	1.099	1.46	0.89	0.9	0.84	1.5382	1.22111	1.7381	1.49914	0.113618
P15311	357	K	Ezrin	EZR	2.763	2.945	2.656	1.87	1.85	1.86	1.47754	1.59189	1.42796	1.49913	0.0138909
P11908	212	K	Ribose-phosphate pyrophosphokinase 2	PRPS2	1.649			1.1	1.07	1.03	1.49909			1.49909
Q8NC51	327	K	Plasminogen activator inhibitor 1 RNA-binding protein	SERBP1	1.497	1.658	1.432	1.02	1.02	1.02	1.46765	1.62549	1.40392	1.49902	0.0251439
P62917	177	K	60S ribosomal protein L8	RPL8	1.284	1.279	1.259	0.84	0.86	0.85	1.52857	1.48721	1.48118	1.49899	0.00133391
P31947	159	K	14-3-3 protein sigma	SFN	1.789	1.75	1.797	1.18	1.18	1.2	1.5161	1.48305	1.4975	1.49888	0.000551056
Q8NC51	294	K	Plasminogen activator inhibitor 1 RNA-binding protein	SERBP1	1.335	1.755	1.496	1.02	1.02	1.02	1.30882	1.72059	1.46667	1.49869	0.0768925
Q99733	192	K	Nucleosome assembly protein 1-like 4	NAP1L4		1.686	1.508	1.01	1.08	1.05		1.56111	1.43619	1.49865	0.111615
O76021	136	K	Ribosomal L1 domain-containing protein 1	RSL1D1	0.926	0.995	1.229	0.7	0.69	0.71	1.32286	1.44203	1.73099	1.49862	0.0783123
P12268	422	K	Inosine-5'-monophosphate dehydrogenase 2	IMPDH2	1.61		1.686	1.11	1.13	1.09	1.45045		1.54679	1.49862	0.0864401
Q14554	160	K	Protein disulfide-isomerase A5	PDIA5	1.034			0.69	0.74	0.71	1.49855			1.49855
P54136	471	K	Arginine--tRNA ligase, cytoplasmic	RARS	1.802		1.779	1.2	1.18	1.19	1.50167		1.49496	1.49831	0.00606021
P11586	297	K	C-1-tetrahydrofolate synthase, cytoplasmic	MTHFD1	1.618			1.08	1.08	1.08	1.49815			1.49815
O75844	66	K	CAAX prenyl protease 1 homolog	ZMPSTE24	1.181	1.273	1.216	0.79	0.84	0.82	1.49494	1.51548	1.48293	1.49778	0.000546252
Q9UNX4	289	K	WD repeat-containing protein 3	WDR3	1.185		1.388	0.87	0.88	0.85	1.36207		1.63294	1.49751	0.233959
P49588	338	K	Alanine--tRNA ligase, cytoplasmic	AARS	1.298	1.117	1.222	0.8	0.81	0.82	1.6225	1.37901	1.49024	1.49725	0.0287564
P62857	47	K	40S ribosomal protein S28	RPS28	1.403		1.455	0.97	0.98	0.94	1.44639		1.54787	1.49713	0.0912614
P10809	91	K	60 kDa heat shock protein, mitochondrial	HSPD1	1.149	1.105	1.308	0.8	0.79	0.79	1.43625	1.39873	1.6557	1.49689	0.0368703
Q9Y3U8	13	K	60S ribosomal protein L36	RPL36	1.306	1.346	1.461	0.93	0.92	0.9	1.4043	1.46304	1.62333	1.49689	0.0250547
Q9NW13	79	K	RNA-binding protein 28	RBM28	1.016	0.982	1.05	0.74	0.69	0.62	1.37297	1.42319	1.69355	1.49657	0.0553299
Q96C19	102	K	EF-hand domain-containing protein D2	EFHD2	1.674		1.587	1.08	1.12	1.1	1.55		1.44273	1.49636	0.09654
Q13813	137	K	Spectrin alpha chain, non-erythrocytic 1	SPTAN1		1.646		1.1	1.1	1.1		1.49636		1.49636
Q06830	190	K	Peroxiredoxin-1	PRDX1	2.132	2.252		1.46	1.47	1.46	1.46027	1.53197		1.49612	0.064831
P12814	195	K	Alpha-actinin-1	ACTN1	1.399	1.464	1.234	0.91	0.91	0.92	1.53736	1.60879	1.3413	1.49582	0.036869
P60228	387	K	Eukaryotic translation initiation factor 3 subunit E	EIF3E		1.376		0.93	0.92	0.95		1.49565		1.49565
P05455	312	K	Lupus La protein	SSB	1.899			1.27	1.24	1.25	1.49528			1.49528
P17987	541	K	T-complex protein 1 subunit alpha	TCP1	1.402	1.531	1.613	1.01	1.01	1.02	1.38812	1.51584	1.58137	1.49511	0.0191378
P30622	424	K	CAP-Gly domain-containing linker protein 1	CLIP1		0.897		0.58	0.6	0.64		1.495		1.495
P08195	298	K	4F2 cell-surface antigen heavy chain	SLC3A2	1.009	0.99	0.975	0.67	0.66	0.66	1.50597	1.5	1.47727	1.49441	0.000468662
Q6NUQ4	382	K	Transmembrane protein 214	TMEM214	1.365	1.441	1.365	0.88	0.89	1.04	1.55114	1.6191	1.3125	1.49425	0.0491886
P35613	227	K	Basigin	BSG		2.586	1.799	1.49	1.51	1.41		1.71258	1.27589	1.49423	0.355517
Q9H3N1	121	K	Thioredoxin-related transmembrane protein 1	TMX1		1.285		0.92	0.86	0.94		1.49419		1.49419
Q9Y617	362	K	Phosphoserine aminotransferase	PSAT1	1.007	0.909	0.968	0.66	0.63	0.64	1.52576	1.44286	1.5125	1.4937	0.00404326
P13639	426	K	Elongation factor 2	EEF2	1.516		1.797	1.12	1.12	1.1	1.35357		1.63364	1.4936	0.242898
Q9H4M9	269	K	EH domain-containing protein 1	EHD1		2.718		1.75	1.82	1.79		1.49341		1.49341
Q9Y266	122	K	Nuclear migration protein nudC	NUDC	1.386	1.399	1.604	0.98	0.98	0.98	1.41429	1.42755	1.63673	1.49286	0.0305855
Q00839	681	K	Heterogeneous nuclear ribonucleoprotein U	HNRNPU	1.364	1.366	1.42	0.93	0.92	0.93	1.46667	1.48478	1.52688	1.49278	0.00195939
P49589	48	K	Cysteine--tRNA ligase, cytoplasmic	CARS		1.388	1.492	0.93	0.97	0.96		1.43093	1.55417	1.49255	0.111479
P46783	38	K	40S ribosomal protein S10	RPS10	1.466	1.419	1.44	0.97	0.99	0.94	1.51134	1.43333	1.53191	1.4922	0.00553548
P39023	294	K	60S ribosomal protein L3	RPL3	1.299	1.37	1.357	0.92	0.9	0.88	1.41196	1.52222	1.54205	1.49207	0.00999211
P23396	197	K	40S ribosomal protein S3	RPS3		1.492		0.99	1	1.03		1.492		1.492
Q96AG4	71	K	Leucine-rich repeat-containing protein 59	LRRC59		1.425	1.424	0.98	0.94	0.97		1.51596	1.46804	1.492	0.0437722
Q07020	119	K	60S ribosomal protein L18	RPL18	1.317	1.338	1.063	0.83	0.84	0.82	1.58675	1.59286	1.29634	1.49198	0.0545135
Q9UQ80	210	K	Proliferation-associated protein 2G4	PA2G4	1.345	1.282	1.536	0.91	0.94	0.94	1.47802	1.36383	1.63404	1.49196	0.0359725
P62910	106	K	60S ribosomal protein L32	RPL32	1.382	1.315	1.344	0.92	0.91	0.88	1.50217	1.44505	1.52727	1.4915	0.0036545
P14625	623	K	Endoplasmin	HSP90B1	1.364	2.37	1.31	1.12	1.13	1.13	1.21786	2.09735	1.15929	1.4915	0.316913
P50991	59	K	T-complex protein 1 subunit delta	CCT4	1.419	1.396	1.391	0.94	0.94	0.94	1.50957	1.48511	1.47979	1.49149	0.000521976
O76021	76	K	Ribosomal L1 domain-containing protein 1	RSL1D1	1.044			0.7	0.69	0.71	1.49143			1.49143
P21283	274	K	V-type proton ATPase subunit C 1	ATP6V1C1	2.464		1.657	1.39	1.26	1.37	1.77266		1.20949	1.49108	0.43377
A1L0T0	429	K	Acetolactate synthase-like protein	ILVBL	1.148			0.77	0.8	0.81	1.49091			1.49091
P07954	66	K	Fumarate hydratase, mitochondrial	FH	2.163		2.024	1.39	1.41	1.42	1.55612		1.42535	1.49073	0.118561
Q92542	349	K	Nicastrin	NCSTN	0.849			0.57	0.59	0.53	1.48947			1.48947
Q96GQ7	634	K	Probable ATP-dependent RNA helicase DDX27	DDX27	1.148	1.072	1.236	0.77	0.77	0.78	1.49091	1.39221	1.58462	1.48924	0.0187941
P36578	390	K	60S ribosomal protein L4	RPL4	1.381	1.238		0.87	0.89	0.89	1.58736	1.39101		1.48918	0.176052
P08238	69	K	Heat shock protein HSP 90-beta	HSP90AB1	1.387	1.433	1.415	0.92	1.02	0.91	1.50761	1.4049	1.55495	1.48915	0.012073
Q96GG9	205	K	DCN1-like protein 1	DCUN1D1	1.51	1.285	1.39	0.97	0.98	0.87	1.5567	1.31122	1.5977	1.48854	0.0467808
O60832	80	K	H/ACA ribonucleoprotein complex subunit 4	DKC1	1.112	1.043	1.044	0.71	0.73	0.71	1.5662	1.42877	1.47042	1.48846	0.0102467
Q9UBV8	260	K	Peflin	PEF1		1.161		0.77	0.78	0.8		1.48846		1.48846
P29992	72	K	Guanine nucleotide-binding protein subunit alpha-11	GNA11	1.81	1.712	1.628	1.21	1.12	1.13	1.49587	1.52857	1.44071	1.48838	0.00410846
Q9NW13	465	K	RNA-binding protein 28	RBM28	1.127	1.095	0.84	0.74	0.69	0.62	1.52297	1.58696	1.35484	1.48826	0.0288486
P62847	99	K	40S ribosomal protein S24	RPS24	1.277	1.361	1.349	0.9	0.88	0.9	1.41889	1.54659	1.49889	1.48812	0.00862507
P06733	335	K	Alpha-enolase	ENO1	1.474	1.486	1.43	0.98	0.99	0.98	1.50408	1.50101	1.45918	1.48809	0.00131777
P13797	300	K	Plastin-3	PLS3	1.814		1.56	1.12	1.14	1.15	1.61964		1.35652	1.48808	0.231851
P46940	1445	K	Ras GTPase-activating-like protein IQGAP1	IQGAP1	1.589	1.55	1.939	1.13	1.13	1.15	1.40619	1.37168	1.68609	1.48799	0.0571272
P11586	370	K	C-1-tetrahydrofolate synthase, cytoplasmic	MTHFD1		1.607		1.08	1.08	1.08		1.48796		1.48796
P27797	207	K	Calreticulin	CALR	1.486	2.365	1.79	1.26	1.27	1.26	1.17937	1.8622	1.42063	1.4874	0.184796
P36578	283	K	60S ribosomal protein L4	RPL4	1.352	1.217	1.369	0.87	0.89	0.89	1.55402	1.36742	1.5382	1.48655	0.0218748
O14656	76	K	Torsin-1A	TOR1A	0.968		0.964	0.65	0.64	0.65	1.48923		1.48308	1.48615	0.00569805
Q99729	223	K	Heterogeneous nuclear ribonucleoprotein A/B	HNRNPAB	0.999	0.96	1.02	0.65	0.71	0.65	1.53692	1.35211	1.56923	1.48609	0.027833
P49207	36	K	60S ribosomal protein L34	RPL34	1.205	1.165	1.181	0.79	0.79	0.81	1.52532	1.47468	1.45802	1.48601	0.00258984
P68104	62	K	Elongation factor 1-alpha 1	EEF1A1	1.406	1.299		0.92	0.9	0.91	1.52826	1.44333		1.4858	0.0782999
P49736	224	K	DNA replication licensing factor MCM2	MCM2	0.969	1.128	1.426	0.78	0.8	0.79	1.24231	1.41	1.80506	1.48579	0.140529
P09429	127	K	High mobility group protein B1	HMGB1	1.525	1.557	1.594	1.08	1.04	1.03	1.41204	1.49712	1.54757	1.48558	0.00980451
Q8NI36	425	K	WD repeat-containing protein 36	WDR36		1.301	1.263	0.85	0.83	0.9		1.56747	1.40333	1.4854	0.149414
Q13907	47	K	Isopentenyl-diphosphate Delta-isomerase 1	IDI1	3.341			2.25	2.27	2.25	1.48489			1.48489
Q8TDY2	1238	K	RB1-inducible coiled-coil protein 1	RB1CC1	1.96			1.32	1.4	1.24	1.48485			1.48485
P30101	496	K	Protein disulfide-isomerase A3	PDIA3	1.347	1.515		0.98	0.95	0.95	1.37449	1.59474		1.48461	0.197951
O75369	2322	K	Filamin-B	FLNB	2.576	2.792	3.034	1.89	1.88	1.89	1.36296	1.48511	1.60529	1.48445	0.029882
P30040	69	K	Endoplasmic reticulum resident protein 29	ERP29	1.264	1.262	1.273	0.85	0.86	0.85	1.48706	1.46744	1.49765	1.48405	0.000500857
Q15293	122	K	Reticulocalbin-1	RCN1			0.831	0.55	0.56	0.56			1.48393	1.48393
O60684	134	K	Importin subunit alpha-7	KPNA6		1.675	1.375	0.98	1.15	0.91		1.45652	1.51099	1.48376	0.0505778
P17480	594	K	Nucleolar transcription factor 1	UBTF	0.737	0.987	0.678	0.57	0.54	0.51	1.29298	1.82778	1.32941	1.48339	0.14939
P00338	14	K	L-lactate dehydrogenase A chain	LDHA		1.61	1.386	1.01	1.01	1.01		1.59406	1.37228	1.48317	0.199801
P55327	163	K	Tumor protein D52	TPD52		1.604	1.525	1.06	1.05	1.06		1.52762	1.43868	1.48315	0.0824034
O94874	105	K	E3 UFM1-protein ligase 1	UFL1	1.142			0.77	0.83	0.86	1.48312			1.48312
Q15645	288	K	Pachytene checkpoint protein 2 homolog	TRIP13			1.142	0.86	0.83	0.77			1.48312	1.48312
P04075	312	K	Fructose-bisphosphate aldolase A	ALDOA	1.521	1.482	1.476	1.01	1	1.01	1.50594	1.482	1.46139	1.48311	0.00106345
Q9Y2X3	418	K	Nucleolar protein 58	NOP58	1.194	1.332	1.119	0.82	0.81	0.83	1.4561	1.64444	1.34819	1.48291	0.0449728
P29692	17	K	Elongation factor 1-delta	EEF1D		1.483	1.343	0.99	0.93	0.98		1.59462	1.37041	1.48252	0.202105
P06733	420	K	Alpha-enolase	ENO1	1.479	1.437	1.457	0.98	0.99	0.98	1.50918	1.45152	1.48673	1.48248	0.00181007
Q13813	633	K	Spectrin alpha chain, non-erythrocytic 1	SPTAN1	1.561	1.653	1.678	1.1	1.1	1.1	1.41909	1.50273	1.52545	1.48242	0.00667308
Q13561	229	K	Dynactin subunit 2	DCTN2	1.368	1.226	1.407	0.91	0.9	0.89	1.5033	1.36222	1.5809	1.48214	0.025432
P62917	155	K	60S ribosomal protein L8	RPL8	1.216	1.294	1.27	0.84	0.86	0.85	1.44762	1.50465	1.49412	1.48213	0.00197512
P36776	420	K	Lon protease homolog, mitochondrial	LONP1		0.993		0.68	0.67	0.66		1.48209		1.48209
Q6NZI2	233	K	Polymerase I and transcript release factor	PTRF		1.49	1.474	1	1.01	0.99		1.47525	1.48889	1.48207	0.0127367
P49773	30	K	Histidine triad nucleotide-binding protein 1	HINT1	1.368	1.353	1.413	0.91	0.94	0.94	1.5033	1.43936	1.50319	1.48195	0.00291545
P06703	32	K	Protein S100-A6	S100A6	2.03			1.37	1.36	1.39	1.48175			1.48175
P53396	177	K	ATP-citrate synthase	ACLY	1.395	1.42	1.392	0.95	0.94	0.95	1.46842	1.51064	1.46526	1.48144	0.00138174
P11021	579	K	78 kDa glucose-regulated protein	HSPA5	1.643	1.765	1.703	1.15	1.16	1.14	1.4287	1.52155	1.49386	1.48137	0.00486801
O00410	961	K	Importin-5	IPO5	1.191	1.152	1.153	0.79	0.79	0.78	1.50759	1.45823	1.47821	1.48134	0.00132813
P08962	188	K	CD63 antigen	CD63	1.062	1.009	0.993	0.59	0.72	0.8	1.8	1.40139	1.24125	1.48088	0.141881
P11021	152	K	78 kDa glucose-regulated protein	HSPA5	1.597	1.833	1.68	1.15	1.16	1.14	1.3887	1.58017	1.47368	1.48085	0.0193289
P00390	296	K	Glutathione reductase, mitochondrial	GSR	1.614			1.09	1.09	1.1	1.48073			1.48073
Q9NUM4	124	K	Transmembrane protein 106B	TMEM106B	1.11	1.237	1.013	0.77	0.72	0.79	1.44156	1.71806	1.28228	1.48063	0.0910865
P11142	507	K	Heat shock cognate 71 kDa protein	HSPA8	1.25	1.305	1.279	0.87	0.86	0.86	1.43678	1.51744	1.48721	1.48048	0.00357708
P27635	82	K	60S ribosomal protein L10	RPL10	1.422	1.298	1.315	0.88	0.92	0.93	1.61591	1.41087	1.41398	1.48025	0.0286465
O60610	527	K	Protein diaphanous homolog 1	DIAPH1	1.474		2.243	1.28	1.29	1.24	1.15156		1.80887	1.48022	0.489607
P06733	103	K	Alpha-enolase	ENO1	1.473	1.441	1.452	0.98	0.99	0.98	1.50306	1.45556	1.48163	1.48008	0.00122561
P06733	281	K	Alpha-enolase	ENO1	1.554	1.277	1.533	0.98	0.99	0.98	1.58571	1.2899	1.56429	1.47997	0.054291
P46777	276	K	60S ribosomal protein L5	RPL5	1.353	1.368	1.392	0.94	0.92	0.92	1.43936	1.48696	1.51304	1.47979	0.00301805
P13639	235	K	Elongation factor 2	EEF2	1.575	1.739		1.12	1.12	1.1	1.40625	1.55268		1.47946	0.135399
Q9Y2X3	441	K	Nucleolar protein 58	NOP58	1.182	1.233	1.223	0.82	0.81	0.83	1.44146	1.52222	1.47349	1.47906	0.00358357
Q9Y3F4	235	K	Serine-threonine kinase receptor-associated protein	STRAP		1.878		1.26	1.27	1.28		1.47874		1.47874
Q9ULV4	212	K	Coronin-1C	CORO1C	2.2	1.975	1.993	1.41	1.39	1.37	1.56028	1.42086	1.45474	1.47863	0.0113442
Q9Y2W1	420	K	Thyroid hormone receptor-associated protein 3	THRAP3	1.536	1.458	1.528	1.04	1.03	0.99	1.47692	1.41553	1.54343	1.47863	0.00881281
P46778	50	K	60S ribosomal protein L21	RPL21		1.003	1.399	0.82	0.83	0.8		1.20843	1.74875	1.47859	0.428894
Q9HAV7	64	K	GrpE protein homolog 1, mitochondrial	GRPEL1	1.657	1.744		1.13	1.17	1.09	1.46637	1.4906		1.47848	0.0227826
Q06830	168	K	Peroxiredoxin-1	PRDX1	2.019	2.237	2.234	1.46	1.47	1.46	1.38288	1.52177	1.53014	1.47826	0.014627
P40227	129	K	T-complex protein 1 subunit zeta	CCT6A	1.459	1.421	1.436	0.97	0.97	0.98	1.50412	1.46495	1.46531	1.47813	0.00110693
Q99733	105	K	Nucleosome assembly protein 1-like 4	NAP1L4	1.488	1.542	1.609	1.01	1.08	1.05	1.47327	1.42778	1.53238	1.47781	0.00597086
P13639	239	K	Elongation factor 2	EEF2		1.655		1.12	1.12	1.1		1.47768		1.47768
P50991	143	K	T-complex protein 1 subunit delta	CCT4	1.269	1.571	1.327	0.94	0.94	0.94	1.35	1.67128	1.4117	1.47766	0.0581951
Q8ND56	174	K	Protein LSM14 homolog A	LSM14A	1.289		1.173	0.81	0.85	0.86	1.59136		1.36395	1.47766	0.206727
Q02543	41	K	60S ribosomal protein L18a	RPL18A	1.324	1.459	1.161	0.87	0.9	0.9	1.52184	1.62111	1.29	1.47765	0.0578413
P04075	42	K	Fructose-bisphosphate aldolase A	ALDOA	1.481	1.455	1.526	1.01	1	1.01	1.46634	1.455	1.51089	1.47741	0.00190946
P18206	1020	K	Vinculin	VCL	2.575		2.328	1.65	1.67	1.67	1.56061		1.39401	1.47731	0.154039
Q8N201	100	K	Integrator complex subunit 1	INTS1	1.359			0.92	1.25	0.94	1.47717			1.47717
Q9H078	673	K	Caseinolytic peptidase B protein homolog	CLPB	1.034			0.7	0.7	0.74	1.47714			1.47714
P31948	337	K	Stress-induced-phosphoprotein 1	STIP1		1.544	1.543	1.06	1.05	1.04		1.47048	1.48365	1.47707	0.0124328
P61353	98	K	60S ribosomal protein L27	RPL27	1.256	1.223	1.154	0.84	0.81	0.81	1.49524	1.50988	1.42469	1.4766	0.00453557
Q13573	266	K	SNW domain-containing protein 1	SNW1	1.134	1.323	1.157	0.84	0.77	0.85	1.35	1.71818	1.36118	1.47645	0.0845284
Q9Y4K0	161	K	Lysyl oxidase homolog 2	LOXL2		2.126		1.43	1.44	1.49		1.47639		1.47639
P31153	391	K	S-adenosylmethionine synthase isoform type-2	MAT2A	1.181			0.8	0.81	0.83	1.47625			1.47625
Q14247	309	K	Src substrate cortactin	CTTN	1.255	1.412	1.232	0.88	0.89	0.87	1.42614	1.58652	1.41609	1.47625	0.0195691
P04844	627	K	Dolichyl-diphosphooligosaccharide--protein glycosyltransferase subunit 2	RPN2	1.281	1.511	1.359	0.92	0.95	0.94	1.39239	1.59053	1.44574	1.47622	0.0223981
P07437	324	K	Tubulin beta chain	TUBB	1.56	1.832	1.435	1.07	1.1	1.1	1.45794	1.66545	1.30455	1.47598	0.0653838
Q9UMX0	47	K	Ubiquilin-1	UBQLN1	1.402	1.379	1.47	0.94	0.95	0.99	1.49149	1.45158	1.48485	1.47597	0.00100775
P13639	845	K	Elongation factor 2	EEF2	1.653			1.12	1.12	1.1	1.47589			1.47589
Q96PK6	164	K	RNA-binding protein 14	RBM14	1.478	1.49	1.53	1.01	1.04	1	1.46337	1.43269	1.53	1.47535	0.00543194
Q09666	2865	K	Neuroblast differentiation-associated protein AHNAK	AHNAK		1.473	1.433	0.99	0.98	0.99		1.50306	1.44747	1.47527	0.0525301
P53396	948	K	ATP-citrate synthase	ACLY	1.433	1.454	1.302	0.95	0.94	0.95	1.50842	1.54681	1.37053	1.47525	0.0184984
P11021	164	K	78 kDa glucose-regulated protein	HSPA5	1.687	1.563	1.836	1.15	1.16	1.14	1.46696	1.34741	1.61053	1.47497	0.0363797
P15311	337	K	Ezrin	EZR	2.702		2.799	1.87	1.85	1.86	1.44492		1.50484	1.47488	0.0566497
P62910	76	K	60S ribosomal protein L32	RPL32	1.263	1.408	1.324	0.92	0.91	0.88	1.37283	1.54725	1.50455	1.47487	0.0178396
P62241	139	K	40S ribosomal protein S8	RPS8	1.474	1.244	1.352	0.92	0.92	0.92	1.60217	1.35217	1.46957	1.47464	0.033012
P63092	300	K	Guanine nucleotide-binding protein G(s) subunit alpha isoforms short	GNAS	1.266	1.113	0.943	0.74	0.74	0.78	1.71081	1.50405	1.20897	1.47461	0.11694
P22234	246	K	Multifunctional protein ADE2	PAICS	1.358	1.41	1.523	0.95	0.99	0.97	1.42947	1.42424	1.5701	1.47461	0.0148597
Q92522	34	K	Histone H1x	H1FX	2.236	2.101	1.067	1.21	1.22	1.25	1.84793	1.72213	0.8536	1.47456	0.340863
P62937	125	K	Peptidyl-prolyl cis-trans isomerase A	PPIA	1.772	1.72	1.712	1.17	1.19	1.17	1.51453	1.44538	1.46325	1.47439	0.00285062
P62913	52	K	60S ribosomal protein L11	RPL11	1.634	1.225	1.284	0.91	0.93	0.98	1.7956	1.3172	1.3102	1.47434	0.137451
P26373	88	K	60S ribosomal protein L13	RPL13	1.247	1.221	1.246	0.85	0.84	0.83	1.46706	1.45357	1.5012	1.47395	0.0013391
Q14980	1475	K	Nuclear mitotic apparatus protein 1	NUMA1	1.346		1.455	0.94	0.94	0.96	1.43191		1.51563	1.47377	0.0791281
Q9BZF9	1228	K	Uveal autoantigen with coiled-coil domains and ankyrin repeats	UACA		2.277	2.232	1.63	1.53	1.53		1.48824	1.45882	1.47353	0.0279422
Q9UHX1	72	K	Poly(U)-binding-splicing factor PUF60	PUF60		0.898	1.119	0.7	0.69	0.68		1.30145	1.64559	1.47352	0.302209
Q02543	151	K	60S ribosomal protein L18a	RPL18A		1.326		0.87	0.9	0.9		1.47333		1.47333
P08670	294	K	Vimentin	VIM	1.174	1.332	1.221	0.84	0.84	0.85	1.39762	1.58571	1.43647	1.47327	0.0213106
P49327	667	K	Fatty acid synthase	FASN	1.512	1.378	1.47	0.98	0.99	0.99	1.54286	1.39192	1.48485	1.47321	0.0126984
Q9NR30	481	K	Nucleolar RNA helicase 2	DDX21	1.038		0.879	0.66	0.65	0.64	1.57273		1.37344	1.47308	0.184305
Q13617	195	K	Cullin-2	CUL2	1.517			1.03	1.03	1.07	1.47282			1.47282
P0DMV9	512	K	Heat shock 70 kDa protein 1B	HSPA1A	2.012	1.764	1.964	1.28	1.31	1.31	1.57187	1.34656	1.49924	1.47256	0.0283574
Q07157	502	K	Tight junction protein ZO-1	TJP1	1.576	1.558	1.577	1.08	1.07	1.05	1.45926	1.45607	1.5019	1.47241	0.00146393
P46776	94	K	60S ribosomal protein L27a	RPL27A	1.499	1.253	1.326	0.92	0.92	0.93	1.62935	1.36196	1.42581	1.47237	0.0410269
O95817	445	K	BAG family molecular chaperone regulator 3	BAG3	1.341	1.394	1.458	0.96	0.96	0.93	1.39688	1.45208	1.56774	1.47223	0.0166237
Q08211	857	K	ATP-dependent RNA helicase A	DHX9		1.428		0.97	0.97	0.99		1.47216		1.47216
O76021	240	K	Ribosomal L1 domain-containing protein 1	RSL1D1	0.993	1.076	1.021	0.7	0.69	0.71	1.41857	1.55942	1.43803	1.47201	0.012823
P33992	350	K	DNA replication licensing factor MCM5	MCM5	1.249	1.244	1.274	0.86	0.86	0.84	1.45233	1.44651	1.51667	1.47183	0.00338724
Q8NI27	1297	K	THO complex subunit 2	THOC2	1.36	1.244		0.93	0.84	0.98	1.46237	1.48095		1.47166	0.0177349
O60218	22	K	Aldo-keto reductase family 1 member B10	AKR1B10	1.446	2.239		1.24	1.26	1.24	1.16613	1.77698		1.47156	0.472103
P20645	38	K	Cation-dependent mannose-6-phosphate receptor	M6PR	1.152		1.099	0.76	0.79	0.77	1.51579		1.42727	1.47153	0.0840134
P83881	38	K	60S ribosomal protein L36a	RPL36A	1.25	1.252	1.241	0.87	0.89	0.79	1.43678	1.40674	1.57089	1.47147	0.0167509
Q2TB90	315	K	Putative hexokinase HKDC1	HKDC1	1.03			0.7	0.69	0.68	1.47143			1.47143
P62750	88	K	60S ribosomal protein L23a	RPL23A	1.339	1.355	1.313	0.91			1.47143			1.47143
P11940	208	K	Polyadenylate-binding protein 1	PABPC1	1.38		1.401	0.94	0.97	0.95	1.46809		1.47474	1.47141	0.00635164
P04075	140	K	Fructose-bisphosphate aldolase A	ALDOA	1.523	1.425	1.495	1.01	1	1.01	1.50792	1.425	1.4802	1.47104	0.0039914
O94776	559	K	Metastasis-associated protein MTA2	MTA2		1.103		0.74	0.75	0.69		1.47067		1.47067
Q00610	1535	K	Clathrin heavy chain 1	CLTC	1.5			1.02	1.03	1.02	1.47059			1.47059
P42166	416	K	Lamina-associated polypeptide 2, isoform alpha	TMPO	1.397			0.95	0.9	0.92	1.47053			1.47053
P63000	5	K	Ras-related C3 botulinum toxin substrate 1	RAC1		1.612	1.315	0.99	1	0.99		1.612	1.32828	1.47014	0.256765
P04406	227	K	Glyceraldehyde-3-phosphate dehydrogenase	GAPDH	1.374	1.496	1.51	1	0.99	0.99	1.374	1.51111	1.52525	1.47012	0.0154252
P13667	362	K	Protein disulfide-isomerase A4	PDIA4	1.514			1.03	1.05	1.04	1.4699			1.4699
Q96HE7	368	K	ERO1-like protein alpha	ERO1L	1.137	1.151	1.075	0.79	0.74	0.76	1.43924	1.55541	1.41447	1.46971	0.012589
Q99832	280	K	T-complex protein 1 subunit eta	CCT7	1.366	1.412	1.484	0.97	0.95	0.98	1.40825	1.48632	1.51429	1.46962	0.00677773
Q96JJ7	364	K	Protein disulfide-isomerase TMX3	TMX3	1.146			0.78	0.8	0.78	1.46923			1.46923
P62081	155	K	40S ribosomal protein S7	RPS7	1.3	1.372	1.368	0.92	0.92	0.91	1.41304	1.4913	1.5033	1.46921	0.00541165
P31689	317	K	DnaJ homolog subfamily A member 1	DNAJA1		1.525	1.427	1	1	1.01		1.525	1.41287	1.46894	0.10663
Q96CW1	420	K	AP-2 complex subunit mu	AP2M1	1.498	1.345	1.403	0.97	0.95	0.97	1.54433	1.41579	1.44639	1.46884	0.0101004
Q14980	1430	K	Nuclear mitotic apparatus protein 1	NUMA1			1.41	0.94	0.94	0.96			1.46875	1.46875
Q15293	165	K	Reticulocalbin-1	RCN1	0.793	0.834	0.826	0.55	0.56	0.56	1.44182	1.48929	1.475	1.4687	0.00134706
P61247	63	K	40S ribosomal protein S3a	RPS3A	1.257	1.302	1.494	0.91	0.93	0.92	1.38132	1.4	1.62391	1.46841	0.0391077
Q96KP4	302	K	Cytosolic non-specific dipeptidase	CNDP2	1.585	1.499		1.07	1.03	1.08	1.48131	1.45534		1.46832	0.0249485
P26038	352	K	Moesin	MSN	1.705		1.335	1.04	1.05	1.03	1.63942		1.29612	1.46777	0.304751
P04075	147	K	Fructose-bisphosphate aldolase A	ALDOA	1.53	1.489	1.413	1.01	1	1.01	1.51485	1.489	1.39901	1.46762	0.00834913
P53041	111	K	Serine/threonine-protein phosphatase 5	PPP5C			1.262	0.83	0.88	0.86			1.46744	1.46744
P49321	44	K	Nuclear autoantigenic sperm protein	NASP	1.325	1.35	1.315	0.91	0.89	0.92	1.45604	1.51685	1.42935	1.46742	0.00457148
Q8NBF2	505	K	NHL repeat-containing protein 2	NHLRC2		1.394		0.95	0.95	1		1.46737		1.46737
P62266	54	K	40S ribosomal protein S23	RPS23	1.439	1.421	1.45	1.02	0.97	0.95	1.41078	1.46495	1.52632	1.46735	0.00756208
P46940	672	K	Ras GTPase-activating-like protein IQGAP1	IQGAP1	1.752	1.538	1.714	1.13	1.13	1.15	1.55044	1.36106	1.49043	1.46731	0.0207807
P04406	219	K	Glyceraldehyde-3-phosphate dehydrogenase	GAPDH	1.45	1.479	1.443	1	0.99	0.99	1.45	1.49394	1.45758	1.46717	0.0012616
P46782	191	K	40S ribosomal protein S5	RPS5	1.407	1.37	1.534	1	0.97	0.97	1.407	1.41237	1.58144	1.46694	0.0218311
O60488	388	K	Long-chain-fatty-acid--CoA ligase 4	ACSL4		1.863		1.24	1.27	1.27		1.46693		1.46693
Q96EY1	130	K	DnaJ homolog subfamily A member 3, mitochondrial	DNAJA3	1.164	1.229	1.342	0.88	0.81	0.86	1.32273	1.51728	1.56047	1.46683	0.0348857
P07900	292	K	Heat shock protein HSP 90-alpha	HSP90AA1	1.765	1.81	1.831	1.2	1.28	1.21	1.47083	1.41406	1.51322	1.46604	0.00565046
Q15293	299	K	Reticulocalbin-1	RCN1	0.811		0.816	0.55	0.56	0.56	1.47455		1.45714	1.46584	0.0168127
P07900	436	K	Heat shock protein HSP 90-alpha	HSP90AA1	1.759			1.2	1.28	1.21	1.46583			1.46583
Q02790	354	K	Peptidyl-prolyl cis-trans isomerase FKBP4	FKBP4	1.295	1.325	1.234	0.89	0.9	0.84	1.45506	1.47222	1.46905	1.46544	0.000192476
P83731	69	K	60S ribosomal protein L24	RPL24	1.236	1.097	1.18	0.78	0.81	0.81	1.58462	1.35432	1.45679	1.46524	0.0294023
P62979	143	K	Ubiquitin-40S ribosomal protein S27a	RPS27A	1.646	1.432	1.592	1.07	1.08	1.04	1.53832	1.32593	1.53077	1.465	0.0319767
P62851	43	K	40S ribosomal protein S25	RPS25	1.236	1.355	1.291	0.88	0.88	0.89	1.40455	1.53977	1.45056	1.46496	0.0107567
Q02543	56	K	60S ribosomal protein L18a	RPL18A	1.298		1.294	0.87	0.9	0.9	1.49195		1.43778	1.46487	0.0523439
Q15149	4091	K	Plectin	PLEC		1.485	1.298		0.95	0.95		1.56316	1.36632	1.46474	0.185255
Q9P0V9	422	K	Septin-10	SEPT10			2.021	1.45	1.4	1.38			1.46449	1.46449
O75369	1564	K	Filamin-B	FLNB	2.11	2.536	3.644	1.89	1.88	1.89	1.1164	1.34894	1.92804	1.46446	0.256671
P82979	119	K	SAP domain-containing ribonucleoprotein	SARNP	1.399	1.394	1.45	0.98	0.98	0.94	1.42755	1.42245	1.54255	1.46418	0.0105352
O43707	346	K	Alpha-actinin-4	ACTN4	1.602	1.624	1.767	1.14	1.13	1.14	1.40526	1.43717	1.55	1.46414	0.0131576
Q92598	655	K	Heat shock protein 105 kDa	HSPH1	1.248		1.153	0.82	0.82	0.82	1.52195		1.4061	1.46402	0.111245
P62277	70	K	40S ribosomal protein S13	RPS13	1.332	1.368	1.311	0.92	0.91	0.91	1.44783	1.5033	1.44066	1.46393	0.00271922
P62750	36	K	60S ribosomal protein L23a	RPL23A	1.332	1.387	1.382	0.91			1.46374			1.46374
Q96A33	286	K	Coiled-coil domain-containing protein 47	CCDC47	1.582	1.298	1.537	1	1.06	0.97	1.582	1.22453	1.58454	1.46369	0.0869492
P04080	30	K	Cystatin-B	CSTB		1.61		1.12	1.1	1.07		1.46364		1.46364
P0DMV9	573	K	Heat shock 70 kDa protein 1B	HSPA1A	1.824	1.89	1.995	1.28	1.31	1.31	1.425	1.44275	1.5229	1.46355	0.00627123
Q99613	99	K	Eukaryotic translation initiation factor 3 subunit C	EIF3C	1.458	1.354	1.389	0.97	0.94	0.96	1.50309	1.44043	1.44688	1.46346	0.00275442
P22102	156	K	Trifunctional purine biosynthetic protein adenosine-3	GART	1.236	1.164		0.82	0.82	0.86	1.50732	1.41951		1.46341	0.0847882
P04181	421	K	Ornithine aminotransferase, mitochondrial	OAT	2.106	2.884	2.047	1.62	1.6	1.59	1.3	1.8025	1.28742	1.46331	0.155502
Q969V3	491	K	Nicalin	NCLN	1.26	1.245	1.255	0.86	0.84	0.87	1.46512	1.48214	1.44253	1.46326	0.000918756
P62979	6	K	Ubiquitin-40S ribosomal protein S27a	RPS27A	1.594	1.525	1.547	1.07	1.08	1.04	1.48972	1.41204	1.4875	1.46309	0.00452888
Q9P0L0	24	K	Vesicle-associated membrane protein-associated protein A	VAPA	1.49	1.569	1.298	1	0.98	1	1.49	1.60102	1.298	1.46301	0.0506835
P17987	532	K	T-complex protein 1 subunit alpha	TCP1	1.468	1.52	1.459	1.01	1.01	1.02	1.45347	1.50495	1.43039	1.46294	0.00338207
Q9BZE4	7	K	Nucleolar GTP-binding protein 1	GTPBP4	1.025	1.053	1.049	0.74	0.71	0.69	1.38514	1.4831	1.52029	1.46284	0.0111866
P62917	42	K	60S ribosomal protein L8	RPL8	1.247	1.187	1.295	0.84	0.86	0.85	1.48452	1.38023	1.52353	1.46276	0.0125739
P15311	344	K	Ezrin	EZR	2.723	2.678	2.761	1.87	1.85	1.86	1.45615	1.44757	1.48441	1.46271	0.000866647
P27105	20	K	Erythrocyte band 7 integral membrane protein	STOM	1.331			0.91	0.93	0.95	1.46264			1.46264
Q04760	157	K	Lactoylglutathione lyase	GLO1		1.448		1	0.99	1		1.46263		1.46263
P46777	158	K	60S ribosomal protein L5	RPL5	1.474	1.319	1.275	0.94	0.92	0.92	1.56809	1.4337	1.38587	1.46255	0.0202269
P13639	258	K	Elongation factor 2	EEF2	1.548	1.626	1.709	1.12	1.12	1.1	1.38214	1.45179	1.55364	1.46252	0.016946
Q03252	265	K	Lamin-B2	LMNB2			1.287	0.87	0.88	0.88			1.4625	1.4625
Q8N1F7	606	K	Nuclear pore complex protein Nup93	NUP93	1.549	1.834	1.535	1.11	1.14	1.11	1.3955	1.60877	1.38288	1.46238	0.035676
P31948	239	K	Stress-induced-phosphoprotein 1	STIP1		1.496	1.56	1.06	1.05	1.04		1.42476	1.5	1.46238	0.0729285
Q99832	230	K	T-complex protein 1 subunit eta	CCT7	1.475	1.427	1.337	0.97	0.95	0.98	1.52062	1.50211	1.36429	1.46234	0.0166418
P16615	492	K	Sarcoplasmic/endoplasmic reticulum calcium ATPase 2	ATP2A2		1.623		1.12	1.11	1.11		1.46216		1.46216
P06733	228	K	Alpha-enolase	ENO1	1.42	1.475	1.418	0.98	0.99	0.98	1.44898	1.4899	1.44694	1.46194	0.00137343
P17987	73	K	T-complex protein 1 subunit alpha	TCP1			1.491	1.01	1.01	1.02			1.46176	1.46176
P62266	21	K	40S ribosomal protein S23	RPS23	1.349	1.534	1.407	1.02	0.97	0.95	1.32255	1.58144	1.48105	1.46168	0.0377203
Q01085	90	K	Nucleolysin TIAR	TIAL1	1.228	1.253	1.298	0.9	0.85	0.84	1.36444	1.47412	1.54524	1.46127	0.0189421
Q14847	87	K	LIM and SH3 domain protein 1	LASP1	1.46	1.468	1.469	0.99	1.01	1.01	1.47475	1.45347	1.45446	1.46089	0.000339437
P61247	195	K	40S ribosomal protein S3a	RPS3A	1.401	1.371	1.259	0.91	0.93	0.92	1.53956	1.47419	1.36848	1.46074	0.017105
Q07020	30	K	60S ribosomal protein L18	RPL18	1.214	1.18	1.242	0.83	0.84	0.82	1.46265	1.40476	1.51463	1.46068	0.00704198
P41567	56	K	Eukaryotic translation initiation factor 1	EIF1	1.385	1.287	1.327	0.89	0.92	0.93	1.55618	1.39891	1.42688	1.46066	0.0161834
P08670	292	K	Vimentin	VIM	1.214	1.271	1.21	0.84	0.84	0.85	1.44524	1.5131	1.42353	1.46062	0.00510502
P21281	108	K	V-type proton ATPase subunit B, brain isoform	ATP6V1B2	2.195	2.009	1.991	1.44	1.42	1.38	1.52431	1.41479	1.44275	1.46062	0.00754403
Q9HA77	223	K	Probable cysteine--tRNA ligase, mitochondrial	CARS2	1.5		1.565	1.01	1.09	1.09	1.48515		1.43578	1.46046	0.0481716
P68104	450	K	Elongation factor 1-alpha 1	EEF1A1	1.308	1.339	1.339	0.92	0.9	0.91	1.42174	1.48778	1.47143	1.46032	0.00277969
Q16864	102	K	V-type proton ATPase subunit F	ATP6V1F		2.071	2.094	1.17	1.5	1.36		1.38067	1.53971	1.46019	0.152583
P26641	227	K	Elongation factor 1-gamma	EEF1G	1.398	1.536	1.225	0.94	0.95	0.96	1.48723	1.61684	1.27604	1.46004	0.0633401
P55072	190	K	Transitional endoplasmic reticulum ATPase	VCP	1.357	1.257	1.299	0.9	0.89	0.89	1.50778	1.41236	1.45955	1.4599	0.00533805
P40429	191	K	60S ribosomal protein L13a	RPL13A	1.33	1.348	1.231	0.86	0.92	0.9	1.54651	1.46522	1.36778	1.45984	0.018415
P14625	87	K	Endoplasmin	HSP90B1	1.635			1.12	1.13	1.13	1.45982			1.45982
P18124	202	K	60S ribosomal protein L7	RPL7	1.363	1.33	1.32	0.92	0.92	0.91	1.48152	1.44565	1.45055	1.45924	0.000895692
Q9UG63	66	K	ATP-binding cassette sub-family F member 2	ABCF2	1.222	1.095	1.207	0.82	0.83	0.77	1.49024	1.31928	1.56753	1.45902	0.0362304
O00148	190	K	ATP-dependent RNA helicase DDX39A	DDX39A			1.386	0.94	0.92	0.95			1.45895	1.45895
P07195	310	K	L-lactate dehydrogenase B chain	LDHB	1.355	1.592	1.308	0.97	0.96	0.99	1.39691	1.65833	1.32121	1.45882	0.0669368
P61313	93	K	60S ribosomal protein L15	RPL15	1.22	1.445		0.93	0.9	0.9	1.31183	1.60556		1.45869	0.270679
P11142	601	K	Heat shock cognate 71 kDa protein	HSPA8	1.203	1.3	1.274	0.87	0.86	0.86	1.38276	1.51163	1.4814	1.45859	0.010626
P26639	243	K	Threonine--tRNA ligase, cytoplasmic	TARS		0.932	1.384	0.78	0.8	0.79		1.165	1.7519	1.45845	0.468358
P51149	31	K	Ras-related protein Rab-7a	RAB7A	1.295	1.339	1.243	0.89	0.87	0.9	1.45506	1.53908	1.38111	1.45842	0.0145403
P16070	38	K	CD44 antigen	CD44	0.986	0.969	0.961	0.67	0.68	0.65	1.47164	1.425	1.47846	1.45837	0.00200887
P11021	154	K	78 kDa glucose-regulated protein	HSPA5	1.695	1.61	1.725	1.15	1.16	1.14	1.47391	1.38793	1.51316	1.45833	0.0096238
Q12797	499	K	Aspartyl/asparaginyl beta-hydroxylase	ASPH	1.254			0.86	0.86	0.89	1.45814			1.45814
P42285	824	K	Superkiller viralicidic activity 2-like 2	SKIV2L2	1.264	1.098		0.81	0.81	0.81	1.56049	1.35556		1.45802	0.195075
Q7Z2Z2	1112	K	Elongation factor Tu GTP-binding domain-containing protein 1	EFTUD1			1.487	1.02	0.9	1.02			1.45784	1.45784
P62937	28	K	Peptidyl-prolyl cis-trans isomerase A	PPIA	1.683	1.739	1.724	1.17	1.19	1.17	1.43846	1.46134	1.4735	1.45777	0.000754515
Q16352	95	K	Alpha-internexin	INA	3.522	3.515	3.69	2.45	2.46	2.45	1.43755	1.42886	1.50612	1.45751	0.00425124
Q14847	75	K	LIM and SH3 domain protein 1	LASP1	1.459	1.487	1.439	0.99	1.01	1.01	1.47374	1.47228	1.42475	1.45692	0.00185496
Q9H832	304	K	Ubiquitin-conjugating enzyme E2 Z	UBE2Z	1.042	1.172	1.351	0.81	0.84	0.8	1.28642	1.39524	1.68875	1.4568	0.0899889
P54577	146	K	Tyrosine--tRNA ligase, cytoplasmic	YARS	1.446	1.275	1.311	0.91	0.94	0.92	1.58901	1.35638	1.425	1.4568	0.0325717
Q9Y3F4	156	K	Serine-threonine kinase receptor-associated protein	STRAP	1.766	1.92		1.26	1.27	1.28	1.40159	1.51181		1.4567	0.107608
P20700	124	K	Lamin-B1	LMNB1	1.093	1.119	1.137	0.78	0.75	0.77	1.40128	1.492	1.47662	1.45664	0.00560458
P62899	70	K	60S ribosomal protein L31	RPL31	1.336	1.375	1.349	0.91	0.91	0.97	1.46813	1.51099	1.39072	1.45661	0.008793
Q03135	57	K	Caveolin-1	CAV1	1.022	0.964	1.044	0.69	0.68	0.71	1.48116	1.41765	1.47042	1.45641	0.00276256
Q9BQE3	401	K	Tubulin alpha-1B chain	TUBA1B	1.602			1.1	1.08	1.09	1.45636			1.45636
Q56VL3	53	K	OCIA domain-containing protein 2	OCIAD2	1.226	1.393	1.162	0.89	0.85	0.86	1.37753	1.63882	1.35116	1.45584	0.0558024
P30040	54	K	Endoplasmic reticulum resident protein 29	ERP29	1.272	1.177	1.277	0.85	0.86	0.85	1.49647	1.3686	1.50235	1.45581	0.0134697
Q99832	144	K	T-complex protein 1 subunit eta	CCT7		1.383		0.97	0.95	0.98		1.45579		1.45579
P30405	167	K	Peptidyl-prolyl cis-trans isomerase F, mitochondrial	PPIF	0.888			0.61	0.66	0.61	1.45574			1.45574
Q9Y3T9	649	K	Nucleolar complex protein 2 homolog	NOC2L	1.399	1.347	1.084	0.94	0.84	0.85	1.4883	1.60357	1.27529	1.45572	0.0607564
P62081	178	K	40S ribosomal protein S7	RPS7	1.349	1.327	1.327	0.92	0.92	0.91	1.4663	1.44239	1.45824	1.45565	0.000356272
O15305	149	K	Phosphomannomutase 2	PMM2	1.533	1.576	1.327	0.99	1.03	1.03	1.54848	1.5301	1.28835	1.45564	0.0471921
P46776	110	K	60S ribosomal protein L27a	RPL27A	1.172	1.412	1.449	0.92	0.92	0.93	1.27391	1.53478	1.55806	1.45559	0.055053
Q02878	124	K	60S ribosomal protein L6	RPL6		1.179		0.82	0.81	0.81		1.45556		1.45556
P35268	69	K	60S ribosomal protein L22	RPL22	1.665	1.364	1.434	1.03	1.06	0.98	1.6165	1.28679	1.46327	1.45552	0.0597755
P08238	568	K	Heat shock protein HSP 90-beta	HSP90AB1	1.29	1.499	1.36	0.92	1.02	0.91	1.40217	1.46961	1.49451	1.45543	0.00545619
P30622	509	K	CAP-Gly domain-containing linker protein 1	CLIP1	0.844			0.58	0.6	0.64	1.45517			1.45517
P22392	124	K	Nucleoside diphosphate kinase B	NME2	1.476	1.363	1.424	1.01	0.97	0.95	1.46139	1.40515	1.49895	1.45516	0.00533491
P15311	438	K	Ezrin	EZR	2.563	2.777	2.778	1.87	1.85	1.86	1.37059	1.50108	1.49355	1.45507	0.0127124
O43657	128	K	Tetraspanin-6	TSPAN6	1.004			0.69	0.68	0.71	1.45507			1.45507
P39019	43	K	40S ribosomal protein S19	RPS19	1.399	1.336	1.267	0.92	0.92	0.91	1.52065	1.45217	1.39231	1.45504	0.00981248
Q02543	143	K	60S ribosomal protein L18a	RPL18A		1.309		0.87	0.9	0.9		1.45444		1.45444
P15170	151	K	Eukaryotic peptide chain release factor GTP-binding subunit ERF3A	GSPT1	1.409	1.492	1.403	0.98	0.98	1	1.43776	1.52245	1.403	1.4544	0.00901745
P25788	179	K	Proteasome subunit alpha type-3	PSMA3			1.367	0.93	0.94	0.94			1.45426	1.45426
P52815	142	K	39S ribosomal protein L12, mitochondrial	MRPL12	1.039	1.136	1.005	0.74	0.71	0.74	1.40405	1.6	1.35811	1.45405	0.0377705
O43399	70	K	Tumor protein D54	TPD52L2	1.182	1.329	1.489	0.91	0.92	0.92	1.2989	1.44457	1.61848	1.45398	0.0568583
P31948	277	K	Stress-induced-phosphoprotein 1	STIP1	1.541			1.06	1.05	1.04	1.45377			1.45377
Q96AG4	40	K	Leucine-rich repeat-containing protein 59	LRRC59	1.54	1.318	1.345	0.98	0.94	0.97	1.57143	1.40213	1.3866	1.45338	0.0246266
P60709	113	K	Actin, cytoplasmic 1	ACTB	1.661	1.685	1.722	1.2	1.15	1.14	1.38417	1.46522	1.51053	1.4533	0.00982521
P38646	345	K	Stress-70 protein, mitochondrial	HSPA9		1.148		0.79	0.79	0.79		1.45316		1.45316
O60832	11	K	H/ACA ribonucleoprotein complex subunit 4	DKC1	0.839	1.397	0.897	0.71	0.73	0.71	1.18169	1.9137	1.26338	1.45292	0.251386
P49321	75	K	Nuclear autoantigenic sperm protein	NASP	1.257	1.274	1.422	0.91	0.89	0.92	1.38132	1.43146	1.54565	1.45281	0.0168612
P36578	182	K	60S ribosomal protein L4	RPL4		1.27	1.316	0.87	0.89	0.89		1.42697	1.47865	1.45281	0.0512717
Q3LXA3	147	K	Bifunctional ATP-dependent dihydroxyacetone kinase/FAD-AMP lyase (cyclizing)	DAK	1.714			1.18	1.15	1.18	1.45254			1.45254
P61009	121	K	Signal peptidase complex subunit 3	SPCS3	1.089	1.176	1.176	0.79	0.81	0.77	1.37848	1.45185	1.52727	1.45254	0.0132463
O95487	849	K	Protein transport protein Sec24B	SEC24B	1.583			1.09	1.12	1.07	1.45229			1.45229
Q8TDN6	31	K	Ribosome biogenesis protein BRX1 homolog	BRIX1	1.22	0.936	0.935	0.71	0.78	0.65	1.71831	1.2	1.43846	1.45226	0.132582
P68363	326	K	Tubulin alpha-1B chain	TUBA1B		1.738	1.879	1.24	1.23	1.26		1.41301	1.49127	1.45214	0.0775332
P62857	16	K	40S ribosomal protein S28	RPS28		1.502	1.289	0.97	0.98	0.94		1.53265	1.37128	1.45196	0.157441
P46777	241	K	60S ribosomal protein L5	RPL5	1.312	1.39	1.333	0.94	0.92	0.92	1.39574	1.51087	1.44891	1.45184	0.00803267
P51665	113	K	26S proteasome non-ATPase regulatory subunit 7	PSMD7			1.263	0.97	0.94	0.87			1.45172	1.45172
P46781	22	K	40S ribosomal protein S9	RPS9	1.326	1.37	1.339	0.93	0.92	0.93	1.42581	1.48913	1.43978	1.45157	0.00270262
Q08257	34	K	Quinone oxidoreductase	CRYZ	1.234	1.341	1.618	0.97	0.96	0.96	1.27216	1.39688	1.68542	1.45149	0.0947997
P20810	489	K	Calpastatin	CAST		2.541	2.714	1.76	1.8	1.82		1.41167	1.49121	1.45144	0.07891
Q9H501	793	K	ESF1 homolog	ESF1			1.277	0.84	0.87	0.88			1.45114	1.45114
Q9P0M6	116	K	Core histone macro-H2A.2	H2AFY2	0.892	0.855	0.898	0.67	0.57	0.59	1.33134	1.5	1.52203	1.45113	0.0257093
P59998	89	K	Actin-related protein 2/3 complex subunit 4	ARPC4		1.523		1.01	1.05	1.02		1.45048		1.45048
Q8TCT8	100	K	Signal peptide peptidase-like 2A	SPPL2A	1.106	1.162	1.105	0.82	0.76	0.75	1.34878	1.52895	1.47333	1.45035	0.0203439
P24534	73	K	Elongation factor 1-beta	EEF1B2			1.247	0.92	0.87	0.86			1.45	1.45
Q99541	140	K	Perilipin-2	PLIN2		1.334		0.93	0.92	0.95		1.45		1.45
Q2TB90	525	K	Putative hexokinase HKDC1	HKDC1			0.986	0.7	0.69	0.68			1.45	1.45
Q13813	981	K	Spectrin alpha chain, non-erythrocytic 1	SPTAN1			1.595	1.1	1.1	1.1			1.45	1.45
P30040	107	K	Endoplasmic reticulum resident protein 29	ERP29	1.23	1.224	1.257	0.85	0.86	0.85	1.44706	1.42326	1.47882	1.44971	0.00191601
P84095	183	K	Rho-related GTP-binding protein RhoG	RHOG	1.578	1.518	1.584	1.05	1.07	1.11	1.50286	1.41869	1.42703	1.44953	0.00527921
P68104	179	K	Elongation factor 1-alpha 1	EEF1A1	1.301	1.313	1.342	0.92	0.9	0.91	1.41413	1.45889	1.47473	1.44925	0.00243784
O94826	563	K	Mitochondrial import receptor subunit TOM70	TOMM70A	1.594			1.1	1.13	1.18	1.44909			1.44909
P46776	47	K	60S ribosomal protein L27a	RPL27A	1.387	1.357	1.269	0.92	0.92	0.93	1.50761	1.475	1.36452	1.44904	0.0136612
P61513	87	K	60S ribosomal protein L37a	RPL37A			1.217	0.91	0.85	0.84			1.44881	1.44881
P39748	200	K	Flap endonuclease 1	FEN1	1.353	1.351	1.452	0.98	0.94	0.95	1.38061	1.43723	1.52842	1.44876	0.0135286
Q15424	475	K	Scaffold attachment factor B1	SAFB			1.101	0.79	0.76	0.76			1.44868	1.44868
P23526	408	K	Adenosylhomocysteinase	AHCY	1.691		1.393	1.06	1.06	1.07	1.59528		1.30187	1.44858	0.275794
P27816	997	K	Microtubule-associated protein 4	MAP4		1.493	1.593	1.06	1.05	1.08		1.4219	1.475	1.44845	0.0531732
Q14204	624	K	Cytoplasmic dynein 1 heavy chain 1	DYNC1H1			1.376	0.95	0.95	0.95			1.44842	1.44842
P42766	43	K	60S ribosomal protein L35	RPL35		1.173		0.79	0.81	0.74		1.44815		1.44815
P33176	753	K	Kinesin-1 heavy chain	KIF5B	1.591	1.569	1.532	1.09	1.08	1.07	1.45963	1.45278	1.43178	1.44806	0.000524308
Q14847	121	K	LIM and SH3 domain protein 1	LASP1	1.559		1.334	0.99	1.01	1.01	1.57475		1.32079	1.44777	0.242808
O60841	1015	K	Eukaryotic translation initiation factor 5B	EIF5B	1.728	1.578	1.684	1.12	1.17	1.16	1.54286	1.34872	1.45172	1.44777	0.0227284
P07195	156	K	L-lactate dehydrogenase B chain	LDHB	1.522	1.382	1.321	0.97	0.96	0.99	1.56907	1.43958	1.33434	1.44767	0.0328012
P61088	92	K	Ubiquitin-conjugating enzyme E2 N	UBE2N	1.549			1.07	1.1	1.08	1.44766			1.44766
P13984	207	K	General transcription factor IIF subunit 2	GTF2F2		1.733	1.852	1.3	1.27	1.21		1.36457	1.53058	1.44757	0.163293
P11021	113	K	78 kDa glucose-regulated protein	HSPA5	1.722	1.703	1.57	1.15	1.16	1.14	1.49739	1.4681	1.37719	1.44756	0.00966367
Q02790	76	K	Peptidyl-prolyl cis-trans isomerase FKBP4	FKBP4	1.323	1.2	1.279	0.89	0.9	0.84	1.48652	1.33333	1.52262	1.44749	0.0243024
P62269	78	K	40S ribosomal protein S18	RPS18	1.375		1.404	0.95	0.96	0.97	1.44737		1.44742	1.4474	5.45944e-05
Q96A49	118	K	Synapse-associated protein 1	SYAP1	1.803	1.89	1.908	1.28	1.28	1.31	1.40859	1.47656	1.45649	1.44721	0.00303471
P25685	195	K	DnaJ homolog subfamily B member 1	DNAJB1	3.435		2.137	1.91	1.98	1.95	1.79843		1.0959	1.44716	0.533422
Q99729	125	K	Heterogeneous nuclear ribonucleoprotein A/B	HNRNPAB		0.909	1.049	0.65	0.71	0.65		1.28028	1.61385	1.44706	0.309062
P60953	163	K	Cell division control protein 42 homolog	CDC42	1.567		1.734	1.11	1.13	1.17	1.41171		1.48205	1.44688	0.0705649
P07108	72	K	Acyl-CoA-binding protein	DBI	1.629	1.579	1.712	1.14	1.1	1.16	1.42895	1.43545	1.47586	1.44675	0.00161444
P07900	58	K	Heat shock protein HSP 90-alpha	HSP90AA1	1.797	1.837	1.703	1.2	1.28	1.21	1.4975	1.43516	1.40744	1.4467	0.00528927
Q14690	1829	K	Protein RRP5 homolog	PDCD11		1.195	1.19	0.89	0.85	0.8		1.40588	1.4875	1.44669	0.081798
P62906	45	K	60S ribosomal protein L10a	RPL10A	1.297	1.249	1.316	0.9	0.89	0.88	1.44111	1.40337	1.49545	1.44665	0.00532782
Q2TB90	425	K	Putative hexokinase HKDC1	HKDC1	0.999	0.995	1	0.7	0.69	0.68	1.42714	1.44203	1.47059	1.44659	0.00121983
Q9UL25	164	K	Ras-related protein Rab-21	RAB21	1.169	1.211	1.43	0.87	0.84	0.92	1.34368	1.44167	1.55435	1.44656	0.0267513
O14980	103	K	Exportin-1	XPO1	1.317		1.227	0.87	0.89	0.89	1.51379		1.37865	1.44622	0.134305
P18206	426	K	Vinculin	VCL	2.558	2.365	2.29	1.65	1.67	1.67	1.5503	1.41617	1.37126	1.44591	0.0211322
P62979	63	K	Ubiquitin-40S ribosomal protein S27a	RPS27A	1.347	1.377	1.876	1.07	1.08	1.04	1.25888	1.275	1.80385	1.44591	0.179001
Q9BZF9	903	K	Uveal autoantigen with coiled-coil domains and ankyrin repeats	UACA		2.212		1.63	1.53	1.53		1.44575		1.44575
P07195	233	K	L-lactate dehydrogenase B chain	LDHB	1.367	1.35	1.506	0.97	0.96	0.99	1.40928	1.40625	1.52121	1.44558	0.0106377
P08195	266	K	4F2 cell-surface antigen heavy chain	SLC3A2	0.932	1.001	0.943	0.67	0.66	0.66	1.39104	1.51667	1.42879	1.4455	0.0103053
P18206	731	K	Vinculin	VCL	2.385			1.65	1.67	1.67	1.44545			1.44545
P04406	215	K	Glyceraldehyde-3-phosphate dehydrogenase	GAPDH	1.442	1.369	1.496	1	0.99	0.99	1.442	1.38283	1.51111	1.44531	0.0102347
P08754	67	K	Guanine nucleotide-binding protein G(k) subunit alpha	GNAI3	1.308		1.162	0.85	0.89	0.86	1.53882		1.35116	1.44499	0.184494
P23528	78	K	Cofilin-1	CFL1	1.773	1.707	1.634	1.18	1.18	1.18	1.50254	1.44661	1.38475	1.44463	0.00866692
P13639	308	K	Elongation factor 2	EEF2	1.568	1.571	1.683	1.12	1.12	1.1	1.4	1.40268	1.53	1.44423	0.0136986
P11021	81	K	78 kDa glucose-regulated protein	HSPA5	1.638	1.712	1.633	1.15	1.16	1.14	1.42435	1.47586	1.43246	1.44422	0.00193841
P0DMV9	257	K	Heat shock 70 kDa protein 1B	HSPA1A	1.865	1.771	1.996	1.28	1.31	1.31	1.45703	1.35191	1.52366	1.4442	0.0184763
Q8WU90	164	K	Zinc finger CCCH domain-containing protein 15	ZC3H15	1.625		1.649	1.09	1.08	1.18	1.49083		1.39746	1.44414	0.0939449
Q9H2G2	1152	K	STE20-like serine/threonine-protein kinase	SLK		1.601	1.715	1.21	1.18	1.12		1.35678	1.53125	1.44401	0.172532
P43243	473	K	Matrin-3	MATR3	1.033	1.379	1.13	0.81	0.83	0.81	1.27531	1.66145	1.39506	1.44394	0.0864545
Q9Y262	301	K	Eukaryotic translation initiation factor 3 subunit L	EIF3L	1.492	1.41	1.357	1	0.96	0.99	1.492	1.46875	1.37071	1.44382	0.0103564
P12268	450	K	Inosine-5'-monophosphate dehydrogenase 2	IMPDH2	1.601	1.586	1.619	1.11	1.13	1.09	1.44234	1.40354	1.48532	1.44373	0.00422271
Q14690	1363	K	Protein RRP5 homolog	PDCD11	1.217	1.292		0.89	0.85	0.8	1.36742	1.52		1.44371	0.151855
Q9Y2X3	93	K	Nucleolar protein 58	NOP58	0.986		1.398	0.82	0.81	0.83	1.20244		1.68434	1.44339	0.417145
Q96QK1	662	K	Vacuolar protein sorting-associated protein 35	VPS35		1.703		1.15	1.18	1.19		1.44322		1.44322
Q00610	78	K	Clathrin heavy chain 1	CLTC	1.448	1.417	1.565	1.02	1.03	1.02	1.41961	1.37573	1.53431	1.44322	0.0166423
Q14204	3274	K	Cytoplasmic dynein 1 heavy chain 1	DYNC1H1		1.371		0.95	0.95	0.95		1.44316		1.44316
P06733	233	K	Alpha-enolase	ENO1	1.452	1.39		0.98	0.99	0.98	1.48163	1.40404		1.44284	0.0784752
P38159	150	K	RNA-binding motif protein, X chromosome	RBMX	1.11	1.101	1.078	0.77	0.75	0.76	1.44156	1.468	1.41842	1.44266	0.0015667
Q86UE4	174	K	Protein LYRIC	MTDH			1.457	1	1.04	1.01			1.44257	1.44257
Q15056	80	K	Eukaryotic translation initiation factor 4H	EIF4H	1.927	1.779	1.905	1.29	1.3	1.3	1.4938	1.36846	1.46538	1.44255	0.0108459
P26639	223	K	Threonine--tRNA ligase, cytoplasmic	TARS		1.154		0.78	0.8	0.79		1.4425		1.4425
Q00839	670	K	Heterogeneous nuclear ribonucleoprotein U	HNRNPU		1.327		0.93	0.92	0.93		1.44239		1.44239
P08621	27	K	U1 small nuclear ribonucleoprotein 70 kDa	SNRNP70	1.265	1.474	1.273	0.93	0.95	0.9	1.36022	1.55158	1.41444	1.44208	0.0239955
P62937	44	K	Peptidyl-prolyl cis-trans isomerase A	PPIA	1.769	1.64	1.68	1.17	1.19	1.17	1.51197	1.37815	1.4359	1.442	0.0113328
P23381	366	K	Tryptophan--tRNA ligase, cytoplasmic	WARS		1.666	1.564	1.09	1.12	1.12		1.4875	1.39643	1.44196	0.0921117
P61604	66	K	10 kDa heat shock protein, mitochondrial	HSPE1	1.24	1.011	1.041	0.78	0.75	0.75	1.58974	1.348	1.388	1.44191	0.0404007
O15067	677	K	Phosphoribosylformylglycinamidine synthase	PFAS			1.283	0.81	0.83	0.89			1.44157	1.44157
P05388	50	K	60S acidic ribosomal protein P0	RPLP0	1.427			0.99	1.02	0.99	1.44141			1.44141
P40227	127	K	T-complex protein 1 subunit zeta	CCT6A	1.581	1.344	1.282	0.97	0.97	0.98	1.6299	1.38557	1.30816	1.44121	0.0654062
O60218	195	K	Aldo-keto reductase family 1 member B10	AKR1B10	1.92	1.708	1.76	1.24	1.26	1.24	1.54839	1.35556	1.41935	1.4411	0.023914
Q14204	3407	K	Cytoplasmic dynein 1 heavy chain 1	DYNC1H1			1.369	0.95	0.95	0.95			1.44105	1.44105
Q00839	626	K	Heterogeneous nuclear ribonucleoprotein U	HNRNPU	1.334	1.33	1.342	0.93	0.92	0.93	1.43441	1.44565	1.44301	1.44102	8.88441e-05
P27816	254	K	Microtubule-associated protein 4	MAP4	1.62		1.462	1.06	1.05	1.08	1.5283		1.3537	1.441	0.173774
P00491	254	K	Purine nucleoside phosphorylase	PNP	1.465	1.632	1.458	1.06	1.07	1.03	1.38208	1.52523	1.41553	1.44095	0.0141165
P05023	54	K	Sodium/potassium-transporting ATPase subunit alpha-1	ATP1A1	1.442	1.425	1.455	1	1.01	0.99	1.442	1.41089	1.4697	1.44086	0.00221914
Q86VM9	510	K	Zinc finger CCCH domain-containing protein 18	ZC3H18	1.339		1.303	0.98	1.01	0.86	1.36633		1.51512	1.44072	0.149184
P11216	10	K	Glycogen phosphorylase, brain form	PYGB	1.894	2.071	1.94	1.38	1.36	1.36	1.37246	1.52279	1.42647	1.44058	0.0146111
Q12929	97	K	Epidermal growth factor receptor kinase substrate 8	EPS8		1.412	1.663	1.07	1.16	1		1.21724	1.663	1.44012	0.395655
Q07866	309	K	Kinesin light chain 1	KLC1	1.598	1.922	1.641	1.17	1.22	1.19	1.36581	1.57541	1.37899	1.44007	0.0337867
Q5QJE6	316	K	Deoxynucleotidyltransferase terminal-interacting protein 2	DNTTIP2			1.008	0.76	0.8	0.7			1.44	1.44
Q99986	34	K	Serine/threonine-protein kinase VRK1	VRK1	1.339			0.93	0.92	1.01	1.43978			1.43978
P12270	215	K	Nucleoprotein TPR	TPR	1.492	1.404	1.536	1.03	1.04	1.01	1.44854	1.35	1.52079	1.43978	0.0184768
Q15843	33	K	NEDD8	NEDD8	1.689	1.643	1.548	1.16	1.12	1.11	1.45603	1.46696	1.39459	1.4392	0.00392183
P18615	33	K	Negative elongation factor E	NELFE	1.662	1.353		1.11	0.98	0.79	1.4973	1.38061		1.43895	0.118283
P83731	93	K	60S ribosomal protein L24	RPL24	1.237	1.122	1.09	0.78	0.81	0.81	1.5859	1.38519	1.34568	1.43892	0.040466
P08670	235	K	Vimentin	VIM	1.218	1.234	1.188	0.84	0.84	0.85	1.45	1.46905	1.39765	1.4389	0.00352931
P10599	81	K	Thioredoxin	TXN			1.741	1.17	1.17	1.21			1.43884	1.43884
P49773	82	K	Histidine triad nucleotide-binding protein 1	HINT1	1.242	1.413	1.361	0.91	0.94	0.94	1.36484	1.50319	1.44787	1.43863	0.0123697
P11142	451	K	Heat shock cognate 71 kDa protein	HSPA8	1.274	1.273	1.179	0.87	0.86	0.86	1.46437	1.48023	1.37093	1.43851	0.00894856
P31948	462	K	Stress-induced-phosphoprotein 1	STIP1	1.547	1.488		1.06	1.05	1.04	1.45943	1.41714		1.43829	0.0433692
P15170	490	K	Eukaryotic peptide chain release factor GTP-binding subunit ERF3A	GSPT1	1.36	1.468	1.429	0.98	0.98	1	1.38776	1.49796	1.429	1.43824	0.00797491
P08195	255	K	4F2 cell-surface antigen heavy chain	SLC3A2	0.951	0.976	0.934	0.67	0.66	0.66	1.4194	1.47879	1.41515	1.43778	0.00328582
P02794	125	K	Ferritin heavy chain	FTH1	0.81	0.868	0.622	0.54	0.51	0.56	1.5	1.70196	1.11071	1.43756	0.175701
P68104	172	K	Elongation factor 1-alpha 1	EEF1A1		1.257	1.345	0.92	0.9	0.91		1.39667	1.47802	1.43734	0.083261
Q08211	266	K	ATP-dependent RNA helicase A	DHX9		1.206	1.615	0.97	0.97	0.99		1.2433	1.63131	1.43731	0.356715
P49458	76	K	Signal recognition particle 9 kDa protein	SRP9	1.425		1.502	1.05	1.03	0.99	1.35714		1.51717	1.43716	0.161249
P61586	104	K	Transforming protein RhoA	RHOA		1.667		1.14	1.16	1.14		1.43707		1.43707
Q9UQ80	199	K	Proliferation-associated protein 2G4	PA2G4	1.29	1.383	1.337	0.91	0.94	0.94	1.41758	1.47128	1.42234	1.43707	0.00230427
Q14103	197	K	Heterogeneous nuclear ribonucleoprotein D0	HNRNPD	1.198	1.292	1.417	0.91	0.91	0.9	1.31648	1.41978	1.57444	1.4369	0.0414277
P40261	26	K	Nicotinamide N-methyltransferase	NNMT	1.146	1.073	1.028	0.75	0.77	0.74	1.528	1.39351	1.38919	1.4369	0.0159284
Q9NYF8	580	K	Bcl-2-associated transcription factor 1	BCLAF1	1.194	1.15	1.219	0.83	0.83	0.82	1.43855	1.38554	1.48659	1.43689	0.00662508
P00558	131	K	Phosphoglycerate kinase 1	PGK1	1.448	1.506	1.557	1.05	1.05	1.04	1.37905	1.43429	1.49712	1.43682	0.00902122
O43776	507	K	Asparagine--tRNA ligase, cytoplasmic	NARS	1.408			0.98			1.43673			1.43673
P33176	548	K	Kinesin-1 heavy chain	KIF5B	1.631	1.479	1.545	1.09	1.08	1.07	1.49633	1.36944	1.44393	1.43657	0.0104982
Q96P70	876	K	Importin-9	IPO9	1.494			1.04	1.08	1.02	1.43654			1.43654
Q7L2E3	138	K	Putative ATP-dependent RNA helicase DHX30	DHX30	1.221			0.85	0.87	0.86	1.43647			1.43647
P04792	112	K	Heat shock protein beta-1	HSPB1		1.148	2.051	1.11	1.12	1.11		1.025	1.84775	1.43637	0.590302
Q9HB71	171	K	Calcyclin-binding protein	CACYBP	1.437	1.297	1.554	1.01	1.01	0.97	1.42277	1.28416	1.60206	1.43633	0.0607047
P62750	106	K	60S ribosomal protein L23a	RPL23A	1.307	1.451	1.514	0.91			1.43626			1.43626
P29692	117	K	Elongation factor 1-delta	EEF1D	1.33	1.444	1.382	0.99	0.93	0.98	1.34343	1.55269	1.4102	1.43544	0.0288299
P62937	49	K	Peptidyl-prolyl cis-trans isomerase A	PPIA	1.672	1.762	1.634	1.17	1.19	1.17	1.42906	1.48067	1.39658	1.43544	0.00470883
P61247	182	K	40S ribosomal protein S3a	RPS3A	1.306			0.91	0.93	0.92	1.43516			1.43516
Q9Y5K6	221	K	CD2-associated protein	CD2AP	2.023	1.403		1.17	1.23	1.21	1.72906	1.14065		1.43486	0.485947
P18124	19	K	60S ribosomal protein L7	RPL7	1.273	1.333	1.339	0.92	0.92	0.91	1.3837	1.44891	1.47143	1.43468	0.00544935
P09429	59	K	High mobility group protein B1	HMGB1		1.492		1.08	1.04	1.03		1.43462		1.43462
Q13435	570	K	Splicing factor 3B subunit 2	SF3B2	1.291			0.9	0.93	0.87	1.43444			1.43444
Q15185	33	K	Prostaglandin E synthase 3	PTGES3	1.397		1.341	0.94	0.91	0.97	1.48617		1.38247	1.43432	0.106473
P62917	92	K	60S ribosomal protein L8	RPL8	1.19		1.234	0.84	0.86	0.85	1.41667		1.45176	1.43422	0.0363471
P18124	59	K	60S ribosomal protein L7	RPL7	1.185	1.272	1.485	0.92	0.92	0.91	1.28804	1.38261	1.63187	1.43417	0.074454
Q96NC0	123	K	Zinc finger matrin-type protein 2	ZMAT2	1.335	1.459	1.534		0.99	1.1		1.47374	1.39455	1.43414	0.0816627
P62280	107	K	40S ribosomal protein S11	RPS11	1.184	1.256	1.258	0.87	0.84	0.87	1.36092	1.49524	1.44598	1.43404	0.0120332
P62906	147	K	60S ribosomal protein L10a	RPL10A	1.421	1.147		0.9	0.89	0.88	1.57889	1.28876		1.43383	0.281208
P41252	848	K	Isoleucine--tRNA ligase, cytoplasmic	IARS	1.31	1.32	1.5	0.97	0.94	0.97	1.35052	1.40426	1.54639	1.43372	0.026162
P09211	121	K	Glutathione S-transferase P	GSTP1			2.222	1.57	1.56	1.55			1.43355	1.43355
Q9BZF9	852	K	Uveal autoantigen with coiled-coil domains and ankyrin repeats	UACA	2.002	2.179	2.521	1.63	1.53	1.53	1.22822	1.42418	1.64771	1.43337	0.100004
P00558	86	K	Phosphoglycerate kinase 1	PGK1		1.57	1.426	1.05	1.05	1.04		1.49524	1.37115	1.4332	0.127222
P14618	115	K	Pyruvate kinase PKM	PKM	1.405	1.532	1.491	1.03	1.03	1.03	1.36408	1.48738	1.44757	1.43301	0.0103954
P27105	58	K	Erythrocyte band 7 integral membrane protein	STOM	1.304			0.91	0.93	0.95	1.43297			1.43297
P05023	1019	K	Sodium/potassium-transporting ATPase subunit alpha-1	ATP1A1	1.403		1.448	1	1.01	0.99	1.403		1.46263	1.43281	0.0618207
P22392	39	K	Nucleoside diphosphate kinase B	NME2	1.23	1.397	1.558	1.01	0.97	0.95	1.21782	1.44021	1.64	1.43268	0.101337
Q86V81	4	K	THO complex subunit 4	ALYREF	1.126	1.079	1.146	0.77	0.79	0.78	1.46234	1.36582	1.46923	1.43246	0.00881832
Q8WUW1	53	K	Protein BRICK1	BRK1	1.547			1.08	1.16	1.19	1.43241			1.43241
P62937	82	K	Peptidyl-prolyl cis-trans isomerase A	PPIA	1.682	1.708	1.666	1.17	1.19	1.17	1.43761	1.43529	1.42393	1.43228	0.00014333
Q00059	62	K	Transcription factor A, mitochondrial	TFAM	1.186	1.191	1.268	0.9	0.88	0.78	1.31778	1.35341	1.62564	1.43228	0.0682116
P0DMV9	112	K	Heat shock 70 kDa protein 1B	HSPA1A	1.9	1.923	1.761	1.28	1.31	1.31	1.48438	1.46794	1.34427	1.4322	0.0153393
P30153	266	K	Serine/threonine-protein phosphatase 2A 65 kDa regulatory subunit A alpha isoform	PPP2R1A	1.349	1.38	1.309	0.95	0.93	0.94	1.42	1.48387	1.39255	1.43214	0.00582643
Q96A26	68	K	Protein FAM162A	FAM162A			1.117	0.69	0.75	0.78			1.43205	1.43205
P05023	45	K	Sodium/potassium-transporting ATPase subunit alpha-1	ATP1A1	1.432			1	1.01	0.99	1.432			1.432
Q8WUM4	327	K	Programmed cell death 6-interacting protein	PDCD6IP		1.926	1.548	1.2	1.2	1.23		1.605	1.25854	1.43177	0.328563
P62937	131	K	Peptidyl-prolyl cis-trans isomerase A	PPIA			1.675	1.17	1.19	1.17			1.43162	1.43162
P68363	163	K	Tubulin alpha-1B chain	TUBA1B		1.755	1.809	1.24	1.23	1.26		1.42683	1.43571	1.43127	0.00927346
P62826	37	K	GTP-binding nuclear protein Ran	RAN	1.308	1.384	1.315	0.92	0.94	0.94	1.42174	1.47234	1.39894	1.43101	0.00377748
P41567	109	K	Eukaryotic translation initiation factor 1	EIF1	1.198	1.428	1.297	0.89	0.92	0.93	1.34607	1.55217	1.39462	1.43095	0.0298632
P78344	735	K	Eukaryotic translation initiation factor 4 gamma 2	EIF4G2		1.202		0.84	0.84	0.83		1.43095		1.43095
P11142	102	K	Heat shock cognate 71 kDa protein	HSPA8	1.281	1.242	1.183	0.87	0.86	0.86	1.47241	1.44419	1.37558	1.43073	0.0066174
P42704	107	K	Leucine-rich PPR motif-containing protein, mitochondrial	LRPPRC	1.628	1.304	1.605	1.06	1.05	1.06	1.53585	1.2419	1.51415	1.43063	0.0653343
P05023	36	K	Sodium/potassium-transporting ATPase subunit alpha-1	ATP1A1	1.509	1.465	1.319	1	1.01	0.99	1.509	1.4505	1.33232	1.43061	0.0211525
P61247	240	K	40S ribosomal protein S3a	RPS3A		1.302	1.344	0.91	0.93	0.92		1.4	1.46087	1.43043	0.0634478
P49368	353	K	T-complex protein 1 subunit gamma	CCT3	1.364	1.509	1.361	0.98	0.99	0.99	1.39184	1.52424	1.37475	1.43028	0.017606
P15311	412	K	Ezrin	EZR	2.674			1.87	1.85	1.86	1.42995			1.42995
Q15843	11	K	NEDD8	NEDD8	1.593		1.65	1.16	1.12	1.11	1.37328		1.48649	1.42988	0.117208
Q9NW13	708	K	RNA-binding protein 28	RBM28	1.058			0.74	0.69	0.62	1.42973			1.42973
P11586	825	K	C-1-tetrahydrofolate synthase, cytoplasmic	MTHFD1	1.544			1.08	1.08	1.08	1.42963			1.42963
Q9BQE3	394	K	Tubulin alpha-1B chain	TUBA1B	1.572			1.1	1.08	1.09	1.42909			1.42909
P60228	120	K	Eukaryotic translation initiation factor 3 subunit E	EIF3E	1.216	1.701	1.074	0.93	0.92	0.95	1.30753	1.84891	1.13053	1.42899	0.246478
Q08257	88	K	Quinone oxidoreductase	CRYZ	1.35	1.335	1.444	0.97	0.96	0.96	1.39175	1.39062	1.50417	1.42885	0.0113711
Q6NZI2	161	K	Polymerase I and transcript release factor	PTRF	1.494	1.394	1.398	1	1.01	0.99	1.494	1.3802	1.41212	1.42877	0.0092414
P49207	105	K	60S ribosomal protein L34	RPL34	1.235	1.119	1.058	0.79	0.79	0.81	1.56329	1.41646	1.30617	1.42864	0.0424197
Q5BJF2	48	K	Transmembrane protein 97	TMEM97		1.157		0.84	0.81	0.89		1.4284		1.4284
P62979	33	K	Ubiquitin-40S ribosomal protein S27a	RPS27A	1.494	1.557	1.505	1.07	1.08	1.04	1.39626	1.44167	1.44712	1.42835	0.00211762
P30622	706	K	CAP-Gly domain-containing linker protein 1	CLIP1	0.908	0.861	0.822	0.58	0.6	0.64	1.56552	1.435	1.28437	1.4283	0.049945
Q96I25	33	K	Splicing factor 45	RBM17	1.309	1.356	1.269	0.93	0.85	0.99	1.40753	1.59529	1.28182	1.42821	0.0616539
P68363	96	K	Tubulin alpha-1B chain	TUBA1B		1.764	1.792	1.24	1.23	1.26		1.43415	1.42222	1.42818	0.0125344
O95563	19	K	Mitochondrial pyruvate carrier 2	MPC2	1.965	1.904		1.38	1.33	1.42	1.42391	1.43158		1.42775	0.00806713
P53396	546	K	ATP-citrate synthase	ACLY	1.351	1.315	1.389	0.95	0.94	0.95	1.42211	1.39894	1.46211	1.42772	0.00277941
Q96EY7	110	K	Pentatricopeptide repeat domain-containing protein 3, mitochondrial	PTCD3	1.508	1.461		0.98	1.11	0.99	1.53878	1.31622		1.4275	0.224556
Q96P16	258	K	Regulation of nuclear pre-mRNA domain-containing protein 1A	RPRD1A	1.43	1.179	1.428	1.05	1.19	0.74	1.3619	0.990756	1.92973	1.42746	0.329436
P31948	395	K	Stress-induced-phosphoprotein 1	STIP1	1.345	1.787	1.363	1.06	1.05	1.04	1.26887	1.7019	1.31058	1.42712	0.127233
P11021	446	K	78 kDa glucose-regulated protein	HSPA5	1.591	1.648	1.683	1.15	1.16	1.14	1.38348	1.42069	1.47632	1.42683	0.00593784
P22626	112	K	Heterogeneous nuclear ribonucleoproteins A2/B1	HNRNPA2B1	1.247	1.213	1.292	0.89	0.87	0.87	1.40112	1.39425	1.48506	1.42681	0.00694324
O43615	237	K	Mitochondrial import inner membrane translocase subunit TIM44	TIMM44	1.07			0.75	0.74	0.74	1.42667			1.42667
P0DMV9	100	K	Heat shock 70 kDa protein 1B	HSPA1A	1.893	1.862	1.807	1.28	1.31	1.31	1.47891	1.42137	1.37939	1.42656	0.00678937
P04406	194	K	Glyceraldehyde-3-phosphate dehydrogenase	GAPDH	1.413	1.423	1.415	1	0.99	0.99	1.413	1.43737	1.42929	1.42656	0.000423309
Q9Y2X3	101	K	Nucleolar protein 58	NOP58	1.146	1.007	1.36	0.82	0.81	0.83	1.39756	1.24321	1.63855	1.42644	0.0940141
P08238	481	K	Heat shock protein HSP 90-beta	HSP90AB1	1.352	1.346	1.356	0.92	1.02	0.91	1.46957	1.31961	1.49011	1.42643	0.0230026
P62633	118	K	Cellular nucleic acid-binding protein	CNBP		1.09	1.192	0.81	0.8	0.8		1.3625	1.49	1.42625	0.132696
P12814	704	K	Alpha-actinin-1	ACTN1			1.312	0.91	0.91	0.92			1.42609	1.42609
P24534	129	K	Elongation factor 1-beta	EEF1B2	1.231	1.268	1.275	0.92	0.87	0.86	1.33804	1.45747	1.48256	1.42602	0.0160328
P06733	406	K	Alpha-enolase	ENO1	1.394	1.345	1.467	0.98	0.99	0.98	1.42245	1.35859	1.49694	1.42599	0.0129549
P40429	159	K	60S ribosomal protein L13a	RPL13A	1.278	1.272	1.268	0.86	0.92	0.9	1.48605	1.38261	1.40889	1.42585	0.00787567
P18124	104	K	60S ribosomal protein L7	RPL7	1.293		1.316	0.92	0.92	0.91	1.40543		1.44615	1.42579	0.0429836
Q00610	506	K	Clathrin heavy chain 1	CLTC	1.534	1.388		1.02	1.03	1.02	1.50392	1.34757		1.42575	0.161741
Q13740	152	K	CD166 antigen	ALCAM	1.392	1.418	1.436	1.01	0.96	1.01	1.37822	1.47708	1.42178	1.42569	0.00670584
Q9NX24	121	K	H/ACA ribonucleoprotein complex subunit 2	NHP2	1.065	0.96	0.935	0.68	0.73	0.67	1.56618	1.31507	1.39552	1.42559	0.0425143
P15531	56	K	Nucleoside diphosphate kinase A	NME1	1.373	1.407	1.397	0.97	0.98	0.98	1.41546	1.43571	1.42551	1.42556	0.000282926
Q5JRA6	819	K	Melanoma inhibitory activity protein 3	MIA3		1.658	1.692	1.16	1.17	1.18		1.41709	1.4339	1.4255	0.0177737
P38159	77	K	RNA-binding motif protein, X chromosome	RBMX	1.177		1.005	0.77	0.75	0.76	1.52857		1.32237	1.42547	0.210183
P23528	132	K	Cofilin-1	CFL1	1.589	1.644	1.813	1.18	1.18	1.18	1.34661	1.39322	1.53644	1.42542	0.0259879
Q13596	490	K	Sorting nexin-1	SNX1	1.867			1.31	1.36	1.3	1.42519			1.42519
P20645	44	K	Cation-dependent mannose-6-phosphate receptor	M6PR	1.108	1.101	1.096	0.76	0.79	0.77	1.45789	1.39367	1.42338	1.42498	0.00284786
Q92973	502	K	Transportin-1	TNPO1	1.342	1.374	1.316	0.93	0.95	0.95	1.44301	1.44632	1.38526	1.42486	0.00324946
P14625	630	K	Endoplasmin	HSP90B1		1.61		1.12	1.13	1.13		1.42478		1.42478
P13639	32	K	Elongation factor 2	EEF2	1.628	1.599	1.532	1.12	1.12	1.1	1.45357	1.42768	1.39273	1.42466	0.00257504
Q96KP4	301	K	Cytosolic non-specific dipeptidase	CNDP2	1.324	1.637	1.563	1.07	1.03	1.08	1.23738	1.58932	1.44722	1.42464	0.0770139
Q14697	908	K	Neutral alpha-glucosidase AB	GANAB	1.282			0.9	0.9	0.9	1.42444			1.42444
P13639	857	K	Elongation factor 2	EEF2	1.549	1.566	1.641	1.12	1.12	1.1	1.38304	1.39821	1.49182	1.42436	0.00950023
P07900	283	K	Heat shock protein HSP 90-alpha	HSP90AA1	1.694	1.8	1.759	1.2	1.28	1.21	1.41167	1.40625	1.45372	1.42388	0.00187362
P38646	138	K	Stress-70 protein, mitochondrial	HSPA9	1.152	1.173	1.049	0.79	0.79	0.79	1.45823	1.48481	1.32785	1.42363	0.0191004
Q08945	612	K	FACT complex subunit SSRP1	SSRP1			1.452	0.97	0.95	1.02			1.42353	1.42353
P05141	92	K	ADP/ATP translocase 2	SLC25A5	1.495	1.389	1.443	1.05	1	0.99	1.42381	1.389	1.45758	1.42346	0.00326232
P02792	105	K	Ferritin light chain	FTL	0.928	0.954	0.936	0.66	0.67	0.65	1.40606	1.42388	1.44	1.42331	0.000803218
P50395	435	K	Rab GDP dissociation inhibitor beta	GDI2	1.695	1.64	1.674	1.2	1.17	1.15	1.4125	1.40171	1.45565	1.42329	0.00226587
Q8NC51	299	K	Plasminogen activator inhibitor 1 RNA-binding protein	SERBP1	1.475	1.469	1.411	1.02	1.02	1.02	1.44608	1.4402	1.38333	1.4232	0.0033356
Q00610	227	K	Clathrin heavy chain 1	CLTC	1.501	1.584	1.285	1.02	1.03	1.02	1.47157	1.53786	1.2598	1.42308	0.0541762
Q16563	179	K	Synaptophysin-like protein 1	SYPL1	1.284	1.407	1.558	1.05		0.96	1.22286		1.62292	1.42289	0.375334
P07195	7	K	L-lactate dehydrogenase B chain	LDHB	1.405	1.376	1.373	0.97	0.96	0.99	1.44845	1.43333	1.38687	1.42289	0.00286755
Q16543	110	K	Hsp90 co-chaperone Cdc37	CDC37			1.764	1.3	1.26	1.24			1.42258	1.42258
P10155	216	K	60 kDa SS-A/Ro ribonucleoprotein	TROVE2	1.443		1.362	0.94	1.04	1.04	1.53511		1.30962	1.42236	0.229801
P30050	86	K	60S ribosomal protein L12	RPL12	1.36		1.314	0.94	0.92	0.94	1.44681		1.39787	1.42234	0.0520431
Q71DI3	123	K	Histone H3.2	HIST2H3A	1.17	1.206	1.235	0.85	0.86	0.83	1.37647	1.40233	1.48795	1.42225	0.00941345
P12270	187	K	Nucleoprotein TPR	TPR		1.479		1.03	1.04	1.01		1.42212		1.42212
Q9Y490	2089	K	Talin-1	TLN1	1.615	1.662	1.428	1.09	1.11	1.11	1.48165	1.4973	1.28649	1.42181	0.0366507
P09429	157	K	High mobility group protein B1	HMGB1	1.543	1.464	1.471	1.08	1.04	1.03	1.4287	1.40769	1.42816	1.42152	0.000403352
P08670	439	K	Vimentin	VIM	1.213	1.183	1.2	0.84	0.84	0.85	1.44405	1.40833	1.41176	1.42138	0.00109147
Q5JTH9	185	K	RRP12-like protein	RRP12	1.099	1.097	1.115	0.79	0.76	0.78	1.39114	1.44342	1.42949	1.42135	0.00205806
P17301	261	K	Integrin alpha-2	ITGA2			1.137	0.74	0.76	0.8			1.42125	1.42125
O00571	55	K	ATP-dependent RNA helicase DDX3X	DDX3X	1.307	1.359	1.284	0.9	0.95	0.93	1.45222	1.43053	1.38065	1.42113	0.0037761
P62829	66	K	60S ribosomal protein L23	RPL23	1.415	1.351	1.267	0.94	0.94	0.96	1.50532	1.43723	1.31979	1.42078	0.0239825
Q15149	1528	K	Plectin	PLEC	1.304	1.364	1.335		0.95	0.95		1.43579	1.40526	1.42053	0.0326487
O60888	82	K	Protein CutA	CUTA	1.335			0.94	0.99	0.93	1.42021			1.42021
Q14247	87	K	Src substrate cortactin	CTTN	1.244	1.303	1.203	0.88	0.89	0.87	1.41364	1.46404	1.38276	1.42015	0.00473509
P09496	242	K	Clathrin light chain A	CLTA	1.355	1.251	1.383	0.91	0.93	0.97	1.48901	1.34516	1.42577	1.41998	0.0144179
P62081	74	K	40S ribosomal protein S7	RPS7	1.298	1.298	1.308	0.92	0.92	0.91	1.41087	1.41087	1.43736	1.4197	0.00066344
P46063	193	K	ATP-dependent DNA helicase Q1	RECQL			1.661	1.18	1.18	1.17			1.41966	1.41966
Q99615	364	K	DnaJ homolog subfamily C member 7	DNAJC7			1.022	0.69	0.74	0.72			1.41944	1.41944
Q02790	83	K	Peptidyl-prolyl cis-trans isomerase FKBP4	FKBP4	1.273	1.283	1.178	0.89	0.9	0.84	1.43034	1.42556	1.40238	1.41942	0.000634861
Q9H9B4	253	K	Sideroflexin-1	SFXN1		1.158	1.126	0.77	0.83	0.78		1.39518	1.44359	1.41939	0.0518462
P60866	34	K	40S ribosomal protein S20	RPS20	1.633	1.29	1.368	0.99	1.04	1	1.64949	1.24038	1.368	1.41929	0.105297
P08670	313	K	Vimentin	VIM	1.172	1.246	1.172	0.84	0.84	0.85	1.39524	1.48333	1.37882	1.41913	0.00887106
Q96J01	86	K	THO complex subunit 3	THOC3			1.263	0.96	1.01	0.89			1.4191	1.4191
P38159	163	K	RNA-binding motif protein, X chromosome	RBMX	1.089	1.058	1.088	0.77	0.75	0.76	1.41429	1.41067	1.43158	1.41884	0.000355829
P50991	321	K	T-complex protein 1 subunit delta	CCT4	1.345	1.337	1.319	0.94	0.94	0.94	1.43085	1.42234	1.40319	1.41879	0.00057165
P46777	43	K	60S ribosomal protein L5	RPL5	1.347	1.225	1.372	0.94	0.92	0.92	1.43298	1.33152	1.4913	1.4186	0.0181485
P08238	411	K	Heat shock protein HSP 90-beta	HSP90AB1	1.335	1.237	1.448	0.92	1.02	0.91	1.45109	1.21275	1.59121	1.41835	0.0906077
P49368	128	K	T-complex protein 1 subunit gamma	CCT3			1.404	0.98	0.99	0.99			1.41818	1.41818
P60709	328	K	Actin, cytoplasmic 1	ACTB	1.642	1.597	1.707	1.2	1.15	1.14	1.36833	1.3887	1.49737	1.41813	0.013485
Q14247	230	K	Src substrate cortactin	CTTN		1.262		0.88	0.89	0.87		1.41798		1.41798
P40429	134	K	60S ribosomal protein L13a	RPL13A		1.321	1.26	0.86	0.92	0.9		1.43587	1.4	1.41793	0.0385878
Q14204	129	K	Cytoplasmic dynein 1 heavy chain 1	DYNC1H1	1.347			0.95	0.95	0.95	1.41789			1.41789
Q13813	1938	K	Spectrin alpha chain, non-erythrocytic 1	SPTAN1	1.437	1.536	1.706	1.1	1.1	1.1	1.30636	1.39636	1.55091	1.41788	0.0411196
O14980	339	K	Exportin-1	XPO1	1.16	1.255	1.344	0.87	0.89	0.89	1.33333	1.41011	1.51011	1.41785	0.0217696
P26885	36	K	Peptidyl-prolyl cis-trans isomerase FKBP2	FKBP2	1.078	1.051	1.018	0.74	0.74	0.74	1.45676	1.42027	1.37568	1.41757	0.00469541
Q14008	1838	K	Cytoskeleton-associated protein 5	CKAP5		1.545		1.07	1.09	1.14		1.41743		1.41743
Q6I9Y2	159	K	THO complex subunit 7 homolog	THOC7		1.156	1.537	0.89	0.95	0.95		1.21684	1.61789	1.41737	0.379941
O75369	328	K	Filamin-B	FLNB		3.05	2.291	1.89	1.88	1.89		1.62234	1.21217	1.41725	0.386703
O75369	272	K	Filamin-B	FLNB	2.782		2.575	1.89	1.88	1.89	1.47196		1.36243	1.4172	0.116847
P62906	106	K	60S ribosomal protein L10a	RPL10A	1.266	1.267	1.25	0.9	0.89	0.88	1.40667	1.4236	1.42045	1.41691	0.000233198
P57088	148	K	Transmembrane protein 33	TMEM33	1.772	1.224	1.429	1.06	1.04	1.02	1.6717	1.17692	1.40098	1.41653	0.140541
Q14498	232	K	RNA-binding protein 39	RBM39	0.954	0.881	0.939	0.67	0.66	0.63	1.42388	1.33485	1.49048	1.4164	0.0171311
P62937	76	K	Peptidyl-prolyl cis-trans isomerase A	PPIA	1.657			1.17	1.19	1.17	1.41624			1.41624
Q14258	283	K	E3 ubiquitin/ISG15 ligase TRIM25	TRIM25	1.531	1.893		1.22	1.2	1.27	1.25492	1.5775		1.41621	0.319162
P50990	400	K	T-complex protein 1 subunit theta	CCT8	1.922	1.046	1.344	1.02	1	1.02	1.88431	1.046	1.31765	1.41599	0.302795
P07195	308	K	L-lactate dehydrogenase B chain	LDHB	1.391	1.334	1.41	0.97	0.96	0.99	1.43402	1.38958	1.42424	1.41595	0.00157205
P62888	26	K	60S ribosomal protein L30	RPL30	1.172	1.412	1.62	1	0.97	1	1.172	1.45567	1.62	1.41589	0.121913
P25398	121	K	40S ribosomal protein S12	RPS12	1.291	1.277	1.382	0.91	0.94	0.94	1.41868	1.35851	1.47021	1.4158	0.00891837
P62913	159	K	60S ribosomal protein L11	RPL11	1.328	1.276		0.91	0.93	0.98	1.45934	1.37204		1.41569	0.0938499
P39023	115	K	60S ribosomal protein L3	RPL3	1.27	1.295	1.256	0.92	0.9	0.88	1.38043	1.43889	1.42727	1.41553	0.00276149
Q96QK1	694	K	Vacuolar protein sorting-associated protein 35	VPS35		1.757	1.597	1.15	1.18	1.19		1.48898	1.34202	1.4155	0.156024
P07437	58	K	Tubulin beta chain	TUBB	1.496	1.542	1.591	1.07	1.1	1.1	1.39813	1.40182	1.44636	1.41544	0.00208145
P05141	63	K	ADP/ATP translocase 2	SLC25A5	1.427	1.406	1.466	1.05	1	0.99	1.35905	1.406	1.48081	1.41529	0.0107569
Q13813	1492	K	Spectrin alpha chain, non-erythrocytic 1	SPTAN1	1.568	1.439	1.663	1.1	1.1	1.1	1.42545	1.30818	1.51182	1.41515	0.0289945
P15880	238	K	40S ribosomal protein S2	RPS2	1.218	1.445	1.153	0.89	0.89	0.92	1.36854	1.6236	1.25326	1.41513	0.0903087
Q14204	809	K	Cytoplasmic dynein 1 heavy chain 1	DYNC1H1	1.231	1.464	1.338	0.95	0.95	0.95	1.29579	1.54105	1.40842	1.41509	0.0410626
P12268	511	K	Inosine-5'-monophosphate dehydrogenase 2	IMPDH2	1.74	1.482	1.489	1.11	1.13	1.09	1.56757	1.3115	1.36606	1.41504	0.0489582
Q13435	529	K	Splicing factor 3B subunit 2	SF3B2	1.264	1.358	1.201	0.9	0.93	0.87	1.40444	1.46022	1.38046	1.41504	0.00482507
P52597	87	K	Heterogeneous nuclear ribonucleoprotein F	HNRNPF	1.013		1.384	0.83	0.85	0.86	1.22048		1.6093	1.41489	0.37257
P17987	109	K	T-complex protein 1 subunit alpha	TCP1	1.429			1.01	1.01	1.02	1.41485			1.41485
Q14789	583	K	Golgin subfamily B member 1	GOLGB1	1.528		1.704	1.08			1.41481			1.41481
P62906	62	K	60S ribosomal protein L10a	RPL10A		1.259		0.9	0.89	0.88		1.41461		1.41461
P11021	96	K	78 kDa glucose-regulated protein	HSPA5	1.611	1.633	1.636	1.15	1.16	1.14	1.40087	1.40776	1.43509	1.41457	0.000951503
Q13098	150	K	COP9 signalosome complex subunit 1	GPS1		1.556		1.21	1.1	1.11		1.41455		1.41455
Q9Y3D9	102	K	28S ribosomal protein S23, mitochondrial	MRPS23	1.183	1.321	1.081	0.86	0.82	0.86	1.37558	1.61098	1.25698	1.41451	0.0828971
Q9Y3F4	147	K	Serine-threonine kinase receptor-associated protein	STRAP	1.77	1.787	1.832	1.26	1.27	1.28	1.40476	1.40709	1.43125	1.41437	0.00062594
P19338	324	K	Nucleolin	NCL	1.143	0.836	1.019	0.71	0.71	0.7	1.60986	1.17746	1.45571	1.41435	0.116023
[truncated: 6,767 more rows]

## Sheet: repeat1
Protein accession	Position	Amino acid	Protein description	Gene name	Localization probability	PEP	Score	Modified sequence	Charge	Mass error [ppm]	MS/MS Count	H	L	L/H Ratio
A0AV96	321	K	RNA-binding protein 47	RBM47	1	0.000505093	105.35	PVDK(1)EQYSR	2	1.2259	1	3663800	4429000	1.474
A0MZ66	158	K	Shootin-1	KIAA1598	1	1.08071e-14	191.53	DQIVSVQEEK(1)K	2	0.28211	1	9951700	22131000	1.916
A0MZ66	406	K	Shootin-1	KIAA1598	1	0.00166142	70.197	ATQPETTEEVTDLK(1)R	2	-0.46962	1	4428400	7605900	1.995
A1A4G5	101	K	Leukemia NUP98 fusion partner 1	LNP1	1	0.0175013	61.962	EPLESK(1)GR	2	-0.9527	2	4560000	5013100	1.295
A1L0T0	429	K	Acetolactate synthase-like protein	ILVBL	1	0.0594087	48.561	QK(1)EQTFR	2	0.35855	1	5038500	4803100	1.148
A5YKK6	556	K	CCR4-NOT transcription complex subunit 1	CNOT1	1	9.02847e-06	122.33	GEQYDQAK(1)LSR	2	-1.5347	2	8827000	7684900	0.865
A6NDY0	182	K	Embryonic polyadenylate-binding protein 2	PABPN1L	1	9.0194e-05	100.73	VTILCDK(1)FSGHPK	3	-0.19829	3	76911000	63909000	0.754
A6NKD9	403	K	Coiled-coil domain-containing protein 85C	CCDC85C	1	0.0403566	46.352	LGDAASSK(1)PSIR	2	-1.2949	2	106450000	117940000	1.047
A8MXV4	278	K	Nucleoside diphosphate-linked moiety X motif 19, mitochondrial	NUDT19	1	0.0017966	54.768	LANFASLSDLHK(1)FCLGR	3	1.3286	1	4411600	2054200	0.515
O00116	482	K	Alkyldihydroxyacetonephosphate synthase, peroxisomal	AGPS	1	1.77817e-07	125.67	VLQHEK(1)QVYDIAAK	2	0.64107	1	4009600	5373600	1.413
O00116	476	K	Alkyldihydroxyacetonephosphate synthase, peroxisomal	AGPS	1	0.000277217	140.35	EK(1)VLQHEK	2	-0.98367	2	4932100	5990700	1.23
O00151	22	K	PDZ and LIM domain protein 1	PDLIM1	1	2.0935e-11	156.17	LVGGK(1)DFEQPLAISR	2	0.46099	3	14450000	16102000	0.957
O00151	98	K	PDZ and LIM domain protein 1	PDLIM1	1	0.0117866	76.073	VWSPLVTEEGK(1)R	2	-1.565	1	0	20563000
O00151	203	K	PDZ and LIM domain protein 1	PDLIM1	1	1.15234e-13	173.06	MLQEK(1)QELNEPPK	2	0.30432	2	7436400	12862000	1.56
O00151	309	K	PDZ and LIM domain protein 1	PDLIM1	1	6.03416e-19	183	GHFFVEDQIYCEK(1)HAR	2	-2.1973	3	82574000	84096000	1.146
O00151	192	K	PDZ and LIM domain protein 1	PDLIM1	1	5.57739e-05	74.364	PLDHAQPPSSLVIDK(1)ESEVYK	3	1.2402	3	6434700	15540000	1.529
O00151	198	K	PDZ and LIM domain protein 1	PDLIM1	1	0.000234993	102.05	ESEVYK(1)MLQEK	2	1.3784	2	12976000	11153000	1.022
O00151	262	K	PDZ and LIM domain protein 1	PDLIM1	1	2.1798e-05	105.02	LPMCDK(1)CGTGIVGVFVK	2	-1.7117	1	0	13399000
O00154	283	K	Cytosolic acyl coenzyme A thioester hydrolase	ACOT7	1	0.0212107	40.384	TNIVTASVDAINFHDK(1)IR	3	-0.37319	1	0	7489700
O00159	486	K	Unconventional myosin-Ic	MYO1C	1	0.00061229	91.313	IICDLVEEK(1)FK	2	0.67188	1	14556000	17299000	1.029
O00186	27	K	Syntaxin-binding protein 3	STXBP3	1	0.0363288	49.06	ATVFDDCK(1)K	2	0.01544	1	3876700	2900100	0.784
O00193	49	K	Small acidic protein	SMAP	1	0.0445751	55.604	LMGAGK(1)K	2	-0.38892	2	24142000	44048000	1.776
O00194	154	K	Ras-related protein Rab-27B	RAB27B	1	4.77481e-07	94.375	ELADK(1)YGIPYFETSAATGQNVEK	3	-0.95046	1	13039000	5966600	0.732
O00194	214	K	Ras-related protein Rab-27B	RAB27B	0.977167	3.72587e-05	60.472	TQIPDTVNGGNSGNLDGEK(0.023)PPEK(0.977)K	3	-0.90529	1	10345000	8191800	0.779
O00231	32	K	26S proteasome non-ATPase regulatory subunit 11	PSMD11	1	2.16593e-31	243.4	EASIDILHSIVK(1)R	2	0.15492	2	20196000	16539000	0.941
O00231	372	K	26S proteasome non-ATPase regulatory subunit 11	PSMD11	1	0.000825338	96.143	LSQMILDK(1)K	2	0.62397	4	49165000	54136000	1.108
O00232	448	K	26S proteasome non-ATPase regulatory subunit 12	PSMD12	1	0.0104992	54.402	TTHLIAK(1)EEMIHNLQ	3	-1.6359	1	0	4460300
O00232	98	K	26S proteasome non-ATPase regulatory subunit 12	PSMD12	1	0.0139747	53.756	SQLK(1)QAVAK	2	1.162	1	5073500	4774200	1.172
O00232	349	K	26S proteasome non-ATPase regulatory subunit 12	PSMD12	1	2.58681e-20	180.31	GSLESPATDVFGSTEEGEK(1)R	2	0.44529	1	4724700	4749300	1.218
O00232	207	K	26S proteasome non-ATPase regulatory subunit 12	PSMD12	1	0.0430498	56.721	TQIISK(1)K	2	-0.52803	1	16354000	17325000	1.107
O00244	38	K	Copper transport protein ATOX1	ATOX1	1	0.00183079	80.688	YDIDLPNK(1)K	2	1.5973	4	131050000	198150000	1.347
O00244	25	K	Copper transport protein ATOX1	ATOX1	1	0.00500563	69.825	VLNK(1)LGGVK	2	0.11703	2	19475000	24488000	1.568
O00244	56	K	Copper transport protein ATOX1	ATOX1	1	5.89165e-19	164.93	VCIESEHSMDTLLATLK(1)K	3	-0.79057	6	61057000	107330000	1.663
O00264	169	K	Membrane-associated progesterone receptor component 1	PGRMC1	1	0.000418155	111.74	YHHVGK(1)LLK	3	1.5541	3	14381000	42994000	0.978
O00264	102	K	Membrane-associated progesterone receptor component 1	PGRMC1	1	0.00628786	82.279	VFDVTK(1)GR	2	0.10677	4	123970000	122350000	0.947
O00264	105	K	Membrane-associated progesterone receptor component 1	PGRMC1	1	0.0137365	66.246	K(1)FYGPEGPYGVFAGR	2	-0.0070132	1	0	14053000
O00267	627	K	Transcription elongation factor SPT5	SUPT5H	1	0.0249676	44.719	SFAFLHCK(1)K	3	-0.12807	1	0	6162400
O00267	265	K	Transcription elongation factor SPT5	SUPT5H	1	0.00513065	75.509	EMTDVLK(1)VVK	2	0.72956	1	0	0
O00267	1021	K	Transcription elongation factor SPT5	SUPT5H	1	0.000443978	58.835	DSEK(1)VVSISSEHLEPITPTK	3	0.28842	1	5229200	8092000	1.233
O00267	143	K	Transcription elongation factor SPT5	SUPT5H	1	0.000321025	99.283	EEELGEYYMK(1)K	2	0.071163	2	6358700	9429400	1.376
O00299	131	K	Chloride intracellular channel protein 1	CLIC1	1	8.6247e-13	156.72	NSNPALNDNLEK(1)GLLK	2	0.23096	5	28664000	45124000	1.436
O00299	49	K	Chloride intracellular channel protein 1	CLIC1	1	0.000113096	119.88	GVTFNVTTVDTK(1)R	2	-1.1238	1	0	34706000
O00299	192	K	Chloride intracellular channel protein 1	CLIC1	1	0.0002843	109.66	LHIVQVVCK(1)K	2	0.9086	4	62450000	90102000	1.559
O00299	135	K	Chloride intracellular channel protein 1	CLIC1	1	0.0227937	68.398	GLLK(1)ALK	2	0.63922	1	15027000	21806000	1.532
O00303	161	K	Eukaryotic translation initiation factor 3 subunit F	EIF3F	1	0.00794361	79.474	NMYELHK(1)K	2	-3.769	1	16063000	26286000	1.525
O00410	961	K	Importin-5	IPO5	1	0.0095186	61.958	VIQSADSK(1)TK	2	0.038826	1	4482400	5261600	1.191
O00422	74	K	Histone deacetylase complex subunit SAP18	SAP18	1	0.0493976	46.318	ELTSLVK(1)EVYPEAR	2	2.5483	1	1080000	2995200	1.763
O00429	271	K	Dynamin-1-like protein	DNM1L	1	0.00900795	65.224	DEYAFLQK(1)K	2	0.22963	2	9913400	13979000	1.363
O00429	75	K	Dynamin-1-like protein	DNM1L	1	7.0306e-09	119.92	RPLILQLVHVSQEDK(1)R	3	1.0625	1	4173700	7305500	1.516
O00461	200	K	Golgi integral membrane protein 4	GOLIM4	1	3.43712e-14	162.26	AHQDIHTQLQDVK(1)QQHK	3	0.16207	1	4384400	3175100	0.833
O00461	156	K	Golgi integral membrane protein 4	GOLIM4	1	0.0474291	66.664	QK(1)YLQLQQEK	2	0.83736	1	0	2408100
O00461	164	K	Golgi integral membrane protein 4	GOLIM4	1	3.06022e-15	167.32	YLQLQQEK(1)EQELSK	2	1.0876	2	11242000	9072200	0.726
O00469	161	K	Procollagen-lysine,2-oxoglutarate 5-dioxygenase 2	PLOD2	1	0.00107675	96.059	LADKYPVVHIGK(1)R	2	-0.41983	2	21288000	18841000	0.78
O00469	204	K	Procollagen-lysine,2-oxoglutarate 5-dioxygenase 2	PLOD2	1	0.00806024	78.77	VYIDPLK(1)R	2	-0.15698	4	131740000	102610000	0.758
O00469	486	K	Procollagen-lysine,2-oxoglutarate 5-dioxygenase 2	PLOD2	1	0.000172132	107.03	DK(1)LDPDMALCR	2	-1.6967	1	21533000	20180000	0.88
O00469	341	K	Procollagen-lysine,2-oxoglutarate 5-dioxygenase 2	PLOD2	1	7.24564e-05	137.95	EVYHEK(1)DIK	2	-2.3165	3	17224000	14570000	0.875
O00469	47	K	Procollagen-lysine,2-oxoglutarate 5-dioxygenase 2	PLOD2	1	0.000621756	61.265	LLVITVATK(1)ESDGFHR	3	0.80257	1	14893000	15140000	0.834
O00469	153	K	Procollagen-lysine,2-oxoglutarate 5-dioxygenase 2	PLOD2	1	0.0170256	41.242	LADK(1)YPVVHIGK	3	-0.55081	1	52717000	43616000	0.702
O00469	344	K	Procollagen-lysine,2-oxoglutarate 5-dioxygenase 2	PLOD2	1	0.00718696	75.825	DIK(1)VFFDK	2	0.57062	1	16532000	12372000	0.792
O00469	335	K	Procollagen-lysine,2-oxoglutarate 5-dioxygenase 2	PLOD2	1	0.000116559	105.95	LFIHNK(1)EVYHEK	2	0.53455	2	30321000	21590000	0.824
O00469	329	K	Procollagen-lysine,2-oxoglutarate 5-dioxygenase 2	PLOD2	1	0.0234552	69.275	EALK(1)LFIHNK	2	-1.2366	1	11122000	5042700	0.866
O00469	404	K	Procollagen-lysine,2-oxoglutarate 5-dioxygenase 2	PLOD2	1	0.0122172	57.293	TLK(1)ILIEQNR	2	-0.50105	1	4118500	7907100	1.532
O00469	355	K	Procollagen-lysine,2-oxoglutarate 5-dioxygenase 2	PLOD2	1	0.00568723	107.29	HEIK(1)TIK	2	-0.55146	1	9533000	5414100	0.57
O00483	73	K	Cytochrome c oxidase subunit NDUFA4	NDUFA4	1	0.0100671	84.365	FYSVNVDYSK(1)LK	2	0.50423	1	0	19389000
O00487	222	K	26S proteasome non-ATPase regulatory subunit 14	PSMD14	1	0.000149946	142.64	MLLNLHK(1)K	2	0.24856	5	54679000	58083000	1.056
O00499	164	K	Myc box-dependent-interacting protein 1	BIN1	1	0.00121477	100.31	HHYESLQTAK(1)K	2	-0.022632	1	0	2649600
O00507	959	K	Probable ubiquitin carboxyl-terminal hydrolase FAF-Y	USP9Y	1	0.0305938	51.415	DK(1)SLITAK	2	1.1213	1	6612700	8363900	1.053
O00541	81	K	Pescadillo homolog	PES1	1	0.0256381	43.68	FLLHEPIVNK(1)FR	3	1.6159	1	6207300	4099800	0.981
O00560	119	K	Syntenin-1	SDCBP	1	1.98007e-06	137.89	EVILCK(1)DQDGK	2	0.067079	3	14668000	29574000	1.933
O00560	173	K	Syntenin-1	SDCBP	1	1.03416e-05	74.251	FGDQVLQINGENCAGWSSDK(1)AHK	3	0.021448	1	6901900	11216000	1.636
O00560	179	K	Syntenin-1	SDCBP	1	0.00153924	80.688	VLK(1)QAFGEK	2	-0.29996	1	8501200	19733000	1.879
O00566	464	K	U3 small nucleolar ribonucleoprotein protein MPP10	MPHOSPH10	1	0.00662684	66.92	LTLDHEK(1)SK	2	-0.52397	1	4502200	4272400	1
O00566	609	K	U3 small nucleolar ribonucleoprotein protein MPP10	MPHOSPH10	1	0.00509751	81.92	SSVDQAGK(1)YSK	2	-1.2162	2	2143800	11303000	0.735
O00566	601	K	U3 small nucleolar ribonucleoprotein protein MPP10	MPHOSPH10	1	0.00191738	81.565	LLEK(1)SSVDQAGK	2	2.6158	1	0	0
O00567	240	K	Nucleolar protein 56	NOP56	1	0.000522363	89.189	LEELTMDGAK(1)AK	2	-0.13503	1	17193000	16093000	1.083
O00567	87	K	Nucleolar protein 56	NOP56	1	3.00406e-07	141.71	LLLETHLPSK(1)K	2	-0.17595	3	76728000	72098000	0.904
O00567	396	K	Nucleolar protein 56	NOP56	1	7.91276e-07	111.7	IDCFSEVPTSVFGEK(1)LR	3	-0.33803	2	18177000	13920000	1.157
O00571	427	K	ATP-dependent RNA helicase DDX3X	DDX3X	1	7.8443e-05	125.75	VVWVEESDK(1)R	2	0.10949	4	44871000	48336000	1.114
O00571	55	K	ATP-dependent RNA helicase DDX3X	DDX3X	1	2.97291e-08	139.3	GFYDK(1)DSSGWSSSK	2	-0.66526	2	17823000	23434000	1.307
O00592	436	K	Podocalyxin	PODXL	1	9.3041e-05	100.11	WDELK(1)EAGVSDMK	2	-1.8148	1	3643900	5934700	1.823
O00629	47	K	Importin subunit alpha-3	KPNA4	1	0.0236796	70.912	DEHLLK(1)R	2	0.16931	1	8755200	9862300	1.112
O00764	258	K	Pyridoxal kinase	PDXK	1	6.08017e-09	121.99	VACEK(1)TVSTLHHVLQR	3	1.0396	1	7102300	9418400	1.347
O00767	51	K	Acyl-CoA desaturase	SCD	1	8.91185e-13	121.38	LETMPLYLEDDIRPDIK(1)DDIYDPTYK	3	1.5254	1	0	5961500
O00767	196	K	Acyl-CoA desaturase	SCD	1	0.000205087	78.326	EK(1)GSTLDLSDLEAEK	2	-0.80503	1	1651300	4070600	2.565
O14530	116	K	Thioredoxin domain-containing protein 9	TXNDC9	1	0.00590406	91.783	HLAILSK(1)K	2	0.18365	2	4824000	6844600	1.504
O14545	17	K	TRAF-type zinc finger domain-containing protein 1	TRAFD1	1	0.0188883	74.423	LCDNCK(1)K	2	-0.32901	1	898980	2686400	4.371
O14548	78	K	Cytochrome c oxidase subunit 7A-related protein, mitochondrial	COX7A2L	1	0.0017416	79.148	ADGVPVYLK(1)R	2	0.44008	1	14778000	27666000	1.228
O14561	92	K	Acyl carrier protein, mitochondrial	NDUFAB1	1	0.00367949	72.2	LYDK(1)IDPEK	2	-1.4397	2	29288000	31393000	1.077
O14561	151	K	Acyl carrier protein, mitochondrial	NDUFAB1	1	0.00475828	50.305	LMCPQEIVDYIADK(1)K	3	-0.29109	2	10978000	15742000	1.182
O14561	97	K	Acyl carrier protein, mitochondrial	NDUFAB1	1	0.000703897	68.168	IDPEK(1)LSVNSHFMK	3	-0.20553	2	19655000	19137000	1.082
O14578	848	K	Citron Rho-interacting kinase	CIT	1	0.00114904	80.69	ISHQDHSDK(1)NR	3	0.68092	2	1195500	2272500	2.066
O14579	278	K	Coatomer subunit epsilon	COPE	1	0.00844851	49.472	YLSQLK(1)DAHR	3	1.0498	1	3816500	7053400	1.535
O14602	56	K	Eukaryotic translation initiation factor 1A, Y-chromosomal	EIF1AY	1	0.00404858	90.913	LEALCFDGVK(1)R	2	0.3132	2	0	44975000
O14617	370	K	AP-3 complex subunit delta-1	AP3D1	1	0.000162683	103.46	ALDLLYGMVSK(1)K	2	1.255	3	11983000	15886000	1.524
O14646	1330	K	Chromodomain-helicase-DNA-binding protein 1	CHD1	1	0.0108604	60.509	EALSGAGSSK(1)R	2	1.5405	1	3076900	3839600	1.295
O14653	74	K	Golgi SNAP receptor complex member 2	GOSR2	1	0.00190671	63.691	VDQLK(1)YDVQHLQTALR	3	0.27501	1	0	4470300
O14656	317	K	Torsin-1A	TOR1A	1	0.0352341	50.04	VFSDK(1)GCK	2	-0.52538	1	5196300	2611500	0.464
O14656	76	K	Torsin-1A	TOR1A	1	3.61539e-27	219.97	DLDDNLFGQHLAK(1)K	2	-1.3	2	19179000	17821000	0.968
O14657	324	K	Torsin-1B	TOR1B	1	0.0603489	42.599	IYSDK(1)GCK	2	0.25863	1	2080800	2526600	1.227
O14672	354	K	Disintegrin and metalloproteinase domain-containing protein 10	ADAM10	1	0.0220063	72.138	LYSDGK(1)K	2	-0.54131	3	16901000	18930000	1.255
O14684	42	K	Prostaglandin E synthase	PTGES	1	0.00136669	80.69	K(1)AFANPEDALR	2	1.1311	2	20186000	47233000	1.67
O14684	120	K	Prostaglandin E synthase	PTGES	1	0.0130019	65.179	VAHTVAYLGK(1)LR	2	-0.060007	1	4299400	4293300	1.291
O14737	97	K	Programmed cell death protein 5	PDCD5	1	7.49276e-07	138.2	VSEQGLIEILK(1)K	2	1.2322	2	32438000	55815000	1.777
O14737	105	K	Programmed cell death protein 5	PDCD5	1	1.49994e-09	156	VSQQTEK(1)TTTVK	2	-1.0033	3	12214000	22276000	1.564
O14745	69	K	Na(+)/H(+) exchange regulatory cofactor NHE-RF1	SLC9A3R1	1	3.00676e-08	107.78	LVEVNGENVEK(1)ETHQQVVSR	3	-0.66873	2	0	33630000
O14776	667	K	Transcription elongation regulator 1	TCERG1	1	0.0124966	56.404	QFK(1)DMLLER	2	-0.23537	1	7970000	5532600	0.959
O14776	955	K	Transcription elongation regulator 1	TCERG1	1	9.91538e-08	141.54	LFNEHIEALTK(1)K	2	-1.1261	2	8115900	5762000	0.93
O14818	47	K	Proteasome subunit alpha type-7	PSMA7	1	0.00161603	81.017	DIVVLGVEK(1)K	2	0.58196	1	124290000	137680000	1.19
O14880	111	K	Microsomal glutathione S-transferase 3	MGST3	1	8.25249e-08	129.77	VLYAYGYYTGEPSK(1)R	2	-0.80828	2	37924000	38502000	1.067
O14964	473	K	Hepatocyte growth factor-regulated tyrosine kinase substrate	HGS	1	1.5561e-07	127.71	LYYEGLQDK(1)LAQIR	3	0.096317	6	16039000	18581000	1.236
O14974	294	K	Protein phosphatase 1 regulatory subunit 12A	PPP1R12A	1	0.00325783	81.95	QNLLHSEK(1)R	2	-0.23851	2	3246200	7295500	1.755
O14974	30	K	Protein phosphatase 1 regulatory subunit 12A	PPP1R12A	1	1.08088e-07	125.97	WIGSETDLEPPVVK(1)R	2	0.13402	2	4852800	4549700	0.89
O14974	961	K	Protein phosphatase 1 regulatory subunit 12A	PPP1R12A	1	1.30383e-11	133.95	AQLHDTNMELTDLK(1)LQLEK	3	0.058027	1	24307000	22750000	1.354
O14975	532	K	Very long-chain acyl-CoA synthetase	SLC27A2	1	5.83586e-05	127.78	MK(1)ENHEFDGK	2	0.92382	2	5782100	2196300	0.508
O14975	389	K	Very long-chain acyl-CoA synthetase	SLC27A2	1	0.0225845	71.715	VNYLQK(1)K	2	0.16325	2	102360000	50514000	0.5
O14975	540	K	Very long-chain acyl-CoA synthetase	SLC27A2	1	1.95017e-09	185.08	MKENHEFDGK(1)K	2	-0.36476	6	27622000	13692000	0.491
O14975	62	K	Very long-chain acyl-CoA synthetase	SLC27A2	1	0.00448083	114.19	AFLEK(1)AR	2	-0.97277	3	36191000	16913000	0.466
O14979	197	K	Heterogeneous nuclear ribonucleoprotein D-like	HNRNPDL	1	1.00587e-09	141.85	GFGFVLFK(1)DAASVDK	2	-0.10112	2	25638000	25693000	1.017
O14979	161	K	Heterogeneous nuclear ribonucleoprotein D-like	HNRNPDL	1	9.62987e-10	154.36	MFIGGLSWDTSK(1)K	2	-3.742	7	47240000	142270000	0.69
O14979	204	K	Heterogeneous nuclear ribonucleoprotein D-like	HNRNPDL	1	2.5762e-06	126.34	DAASVDK(1)VLELK	2	-0.28221	3	50170000	50355000	1.017
O14979	234	K	Heterogeneous nuclear ribonucleoprotein D-like	HNRNPDL	1	0.000211936	74.732	K(1)VFVGGLSPDTSEEQIK	2	-0.84402	1	5044800	6374100	1.017
O14979	142	K	Heterogeneous nuclear ribonucleoprotein D-like	HNRNPDL	1	2.08411e-06	129.34	INASK(1)NQQDDGK	2	-0.29622	2	1676900	1644700	0.984
O14979	288	K	Heterogeneous nuclear ribonucleoprotein D-like	HNRNPDL	1	6.2935e-11	143.94	GFCFITYTDEEPVK(1)K	3	0.039398	3	63358000	65747000	0.996
O14979	209	K	Heterogeneous nuclear ribonucleoprotein D-like	HNRNPDL	1	0.00260809	114.28	VLELK(1)EHK	2	-0.38987	4	40671000	39893000	1.03
O14979	212	K	Heterogeneous nuclear ribonucleoprotein D-like	HNRNPDL	1	0.00558208	107.9	EHK(1)LDGK	2	0.72294	2	9650600	8429100	0.818
O14979	302	K	Heterogeneous nuclear ribonucleoprotein D-like	HNRNPDL	1	1.83695e-13	177.12	YHQIGSGK(1)CEIK	3	0.20565	3	41221000	38774000	0.994
O14979	216	K	Heterogeneous nuclear ribonucleoprotein D-like	HNRNPDL	1	0.00119958	86.898	LDGK(1)LIDPK	2	-0.20741	2	25578000	26876000	1.117
O14979	311	K	Heterogeneous nuclear ribonucleoprotein D-like	HNRNPDL	1	0.00146905	81.972	VAQPK(1)EVYR	2	-0.5184	1	13227000	13908000	1.044
O14980	103	K	Exportin-1	XPO1	1	0.0202903	62.546	NQCEGIK(1)K	2	-0.81041	1	12030000	15686000	1.317
O14980	339	K	Exportin-1	XPO1	1	9.6128e-06	155.06	EHDQLIEK(1)R	2	-0.51967	3	13858000	14560000	1.16
O14980	531	K	Exportin-1	XPO1	1	0.00808387	66.664	DLLGLCEQK(1)R	2	0.74267	2	32803000	34821000	1.165
O15042	840	K	U2 snRNP-associated SURP motif-containing protein	U2SURP	1	0.0164795	76.943	YSEMSEEK(1)R	2	-0.53128	1	0	778300
O15061	498	K	Synemin	SYNM	1	0.039965	58.981	TVILGK(1)K	2	0.00092101	1	9157900	9376800	1.031
O15061	1528	K	Synemin	SYNM	1	0.0246478	57.708	EQAMFDK(1)K	2	2.7942	1	17866000	11782000	0.905
O15067	737	K	Phosphoribosylformylglycinamidine synthase	PFAS	1	0.0254003	50.791	SLLDPK(1)VAAR	2	0.6161	1	14336000	17281000	1.389
O15118	392	K	Niemann-Pick C1 protein	NPC1	1	5.35845e-06	98.943	LEK(1)EYFDQHFGPFFR	3	-0.035566	2	10961000	7597600	0.757
O15143	233	K	Actin-related protein 2/3 complex subunit 1B	ARPC1B	1	2.12923e-08	116.87	VAWVSHDSTVCLADADK(1)K	3	-0.11296	3	56005000	72850000	1.181
O15143	307	K	Actin-related protein 2/3 complex subunit 1B	ARPC1B	1	0.0168943	76.774	FQNLDK(1)K	2	-0.79976	2	52204000	53323000	1.056
O15144	77	K	Actin-related protein 2/3 complex subunit 2	ARPC2	1	0.00108156	75.02	ELQAHGADELLK(1)R	2	0.44066	1	3592300	4588800	1.304
O15144	117	K	Actin-related protein 2/3 complex subunit 2	ARPC2	1	2.14323e-09	154.36	DSIVHQAGMLK(1)R	3	0.51861	5	82154000	107920000	1.298
O15145	155	K	Actin-related protein 2/3 complex subunit 3	ARPC3	1	0.000762638	88.338	VFDPQNDK(1)PSK	2	1.597	1	9511300	11676000	1.273
O15162	223	K	Phospholipid scramblase 1	PLSCR1	1	0.00810234	78.516	FTIQNEK(1)R	2	-0.5924	3	43175000	41453000	0.989
O15173	132	K	Membrane-associated progesterone receptor component 2	PGRMC2	1	0.00639597	67.334	VFDVTK(1)GSK	2	0.67924	2	13953000	14490000	0.934
O15173	126	K	Membrane-associated progesterone receptor component 2	PGRMC2	1	0.000360311	79.885	ILLAVNGK(1)VFDVTK	2	-0.4543	1	3914200	4536700	1.057
O15173	135	K	Membrane-associated progesterone receptor component 2	PGRMC2	1	0.00413289	75.018	GSK(1)FYGPAGPYGIFAGR	2	1.1853	1	0	5781700
O15226	523	K	NF-kappa-B-repressing factor	NKRF	1	0.00525829	69.672	TQPTVINNLK(1)K	2	-1.2559	1	13861000	18057000	1.405
O15226	666	K	NF-kappa-B-repressing factor	NKRF	1	0.0485867	58.63	K(1)EDLLDQLK	2	-0.091477	1	0	26682000
O15230	2451	K	Laminin subunit alpha-5	LAMA5	1	6.36494e-05	86.944	LLHSLDQAK(1)EELER	3	-0.54266	2	9784400	6489900	0.666
O15235	137	K	28S ribosomal protein S12, mitochondrial	MRPS12	1	0.000359122	120.31	YDCGHVQK(1)K	2	-0.53935	2	8450500	8205200	0.893
O15235	129	K	28S ribosomal protein S12, mitochondrial	MRPS12	1	0.00038263	99.973	GK(1)YDCGHVQK	2	-0.3872	2	561200	776300	0.865
O15258	181	K	Protein RER1	RER1	1	0.00181134	66.692	YIPFTHGK(1)R	3	2.5378	2	12567000	7624000	0.857
O15260	139	K	Surfeit locus protein 4	SURF4	1	0.00641309	55.011	SEGK(1)SMFAGVPTMR	2	-1.5405	1	6762700	6034200	1.018
O15269	127	K	Serine palmitoyltransferase 1	SPTLC1	1	0.0165606	54.343	K(1)YGVGTCGPR	2	-0.25812	1	4181400	5091800	1.072
O15270	391	K	Serine palmitoyltransferase 2	SPTLC2	1	0.000532985	85.554	SFGASGGYIGGK(1)K	2	0.010013	2	17757000	34720000	1.851
O15305	149	K	Phosphomannomutase 2	PMM2	1	0.00999733	63.734	IEFYELDK(1)K	2	1.3246	1	4800100	6183600	1.533
O15305	210	K	Phosphomannomutase 2	PMM2	1	3.37009e-09	97.776	TIYFFGDK(1)TMPGGNDHEIFTDPR	3	-0.52615	1	10265000	13143000	1.295
O15320	95	K	cTAGE family member 5	CTAGE5	1	0.0335831	72.2	LLEK(1)FSLVQK	2	-0.45919	1	0	22399000
O15320	458	K	cTAGE family member 5	CTAGE5	1	8.3008e-16	177.04	TIHSYQGQIISHEK(1)K	2	-0.54564	4	37701000	46014000	1.224
O15320	260	K	cTAGE family member 5	CTAGE5	1	1.94546e-05	92.38	VHAEQVLNDK(1)ESHIK	3	0.53278	2	24523000	29507000	1.19
O15320	347	K	cTAGE family member 5	CTAGE5	1	0.00973889	61.577	TK(1)EELTEHIK	2	2.5959	1	2300400	1253100	0.865
O15320	420	K	cTAGE family member 5	CTAGE5	1	6.58025e-13	143.28	VDEK(1)ISHATEELETYR	3	-0.47473	2	17515000	20555000	1.257
O15320	171	K	cTAGE family member 5	CTAGE5	1	3.97565e-09	126.16	HSEQDELMADISK(1)R	2	0.45262	1	4536100	6886400	1.366
O15320	184	K	cTAGE family member 5	CTAGE5	1	0.0364063	60.598	SLK(1)SQVAEAK	2	0.83408	1	2458500	2612800	1.276
O15347	170	K	High mobility group protein B3	HMGB3	1	0.00169555	101.89	FDGAK(1)GPAK	2	-0.67479	3	29404000	36220000	1.218
O15347	155	K	High mobility group protein B3	HMGB3	1	0.00813404	73.499	YEK(1)DVADYK	2	-1.3193	1	0	0
O15347	125	K	High mobility group protein B3	HMGB3	1	0.000324398	84.759	STNPGISIGDVAK(1)K	2	0.48718	3	23453000	29994000	1.174
O15355	519	K	Protein phosphatase 1G	PPM1G	1	3.50143e-09	148.13	NTAELQPESGK(1)R	2	0.2125	1	8453500	14674000	1.762
O15355	339	K	Protein phosphatase 1G	PPM1G	1	0.000336128	89.507	GK(1)QLIVANAGDSR	2	-0.4706	1	3762100	8918300	2.613
O15355	406	K	Protein phosphatase 1G	PPM1G	1	0.00064785	103.19	AIGDHFYK(1)R	2	0.40983	4	18911000	44720000	1.371
O15371	53	K	Eukaryotic translation initiation factor 3 subunit D	EIF3D	1	1.31928e-06	127.71	VADWTGATYQDK(1)R	2	1.1554	3	17187000	19961000	1.169
O15371	514	K	Eukaryotic translation initiation factor 3 subunit D	EIF3D	1	0.00365512	102.95	DPNK(1)QVIR	2	-0.080294	2	5103300	6460500	1.272
O15371	505	K	Eukaryotic translation initiation factor 3 subunit D	EIF3D	1	0.000910494	88.948	LEEGK(1)YLILK	2	-0.13793	2	5600800	6736300	1.19
O15372	227	K	Eukaryotic translation initiation factor 3 subunit H	EIF3H	1	1.97165e-20	166.29	SAVADK(1)HELLSLASSNHLGK	3	-1.2951	3	73965000	80979000	1.225
O15382	321	K	Branched-chain-amino-acid aminotransferase, mitochondrial	BCAT2	1	0.000560741	101.25	TITMK(1)QLLR	2	-0.32321	3	8720900	9062800	0.875
O15438	238	K	Canalicular multispecific organic anion transporter 2	ABCC3	1	0.0180294	47.062	HPLEEK(1)DLWSLK	3	0.64901	1	18656000	7267500	0.395
O15438	401	K	Canalicular multispecific organic anion transporter 2	ABCC3	1	0.00131249	85.533	ALVITNSVK(1)R	2	-0.26901	1	17870000	6180900	0.339
O15498	182	K	Synaptobrevin homolog YKT6	YKT6	1	0.000544872	109.15	SEVLGTQSK(1)AFYK	2	3.6492	1	0	5905500
O15498	186	K	Synaptobrevin homolog YKT6	YKT6	1	0.0114293	85.265	AFYK(1)TAR	2	-0.76183	2	2666200	7313700	2.715
O15511	93	K	Actin-related protein 2/3 complex subunit 5	ARPC5	1	0.0440713	59.884	ANDIEK(1)AVQSLDK	2	-0.58891	1	0	15729000
O15511	100	K	Actin-related protein 2/3 complex subunit 5	ARPC5	1	4.58025e-05	95.067	AVQSLDK(1)NGVDLLMK	2	2.5611	1	2397700	3886700	1.223
O43143	488	K	Putative pre-mRNA-splicing factor ATP-dependent RNA helicase DHX15	DHX15	1	0.00642473	81.296	LYTEK(1)AYK	2	-0.33663	2	17037000	18443000	1.301
O43143	17	K	Putative pre-mRNA-splicing factor ATP-dependent RNA helicase DHX15	DHX15	1	0.00613578	84.892	LDLGEDYPSGK(1)K	2	1.0338	1	0	21181000
O43143	515	K	Putative pre-mRNA-splicing factor ATP-dependent RNA helicase DHX15	DHX15	1	4.13253e-05	116.03	SNLGSVVLQLK(1)K	3	0.30744	3	72194000	77542000	1.114
O43143	407	K	Putative pre-mRNA-splicing factor ATP-dependent RNA helicase DHX15	DHX15	1	0.0138982	57.859	IFEPPPPK(1)K	2	0.99228	1	11908000	15817000	1.277
O43148	163	K	mRNA cap guanine-N7 methyltransferase	RNMT	1	1.93928e-05	53.481	NLEEGHSSTVAAHYNELQEVGLEK(1)R	4	-2.2481	1	6459500	9029700	1.346
O43159	90	K	Ribosomal RNA-processing protein 8	RRP8	1	0.033112	48.874	ASFASASAEVGK(1)K	2	-0.61645	1	2091600	3171900	1.664
O43169	88	K	Cytochrome b5 type B	CYB5B	1	7.85404e-14	121.5	EMLK(1)QYYIGDIHPSDLKPESGSK	3	-0.90209	2	12673000	21313000	1.687
O43169	30	K	Cytochrome b5 type B	CYB5B	1	0.00716099	105.39	LEEVAK(1)R	2	0.15369	4	296570000	334510000	1.154
O43172	146	K	U4/U6 small nuclear ribonucleoprotein Prp4	PRPF4	1	1.65509e-06	124.07	NILSVVGTDALK(1)K	2	-0.0015416	2	15632000	20659000	1.214
O43181	95	K	NADH dehydrogenase [ubiquinone] iron-sulfur protein 4, mitochondrial	NDUFS4	1	2.67586e-17	193.28	NNMQSGVNNTK(1)K	2	-0.55013	2	3193900	3211600	0.886
O43237	81	K	Cytoplasmic dynein 1 light intermediate chain 2	DYNC1LI2	1	0.000508331	111.06	LQGAEHGK(1)K	2	0.22196	1	4864900	5599100	1.19
O43237	8	K	Cytoplasmic dynein 1 light intermediate chain 2	DYNC1LI2	1	0.0186023	64.42	APVGVEK(1)K	2	1.4491	1	2600800	3896700	1.671
O43237	352	K	Cytoplasmic dynein 1 light intermediate chain 2	DYNC1LI2	1	1.91364e-11	141.6	LVHDK(1)ELAAEDEQVFLMK	3	0.58185	2	14878000	17897000	1.259
O43237	318	K	Cytoplasmic dynein 1 light intermediate chain 2	DYNC1LI2	1	0.00110871	73.834	DAVFIPAGWDNEK(1)K	2	-1.647	2	11201000	14167000	1.241
O43242	84	K	26S proteasome non-ATPase regulatory subunit 3	PSMD3	1	0.0104325	60.102	QLEK(1)AVSGK	2	0.57448	2	1908600	2456400	2.211
O43242	296	K	26S proteasome non-ATPase regulatory subunit 3	PSMD3	1	0.000568889	88.021	IK(1)AIQLEYSEAR	2	-0.52912	1	8601100	10495000	0.987
O43242	89	K	26S proteasome non-ATPase regulatory subunit 3	PSMD3	1	0.019759	58.981	AVSGK(1)EPR	2	-0.45818	1	5669800	4337900	0.87
O43242	76	K	26S proteasome non-ATPase regulatory subunit 3	PSMD3	1	9.76121e-06	118.51	ELDTVTLEDIK(1)EHVK	2	0.23973	2	0	26292000
O43242	80	K	26S proteasome non-ATPase regulatory subunit 3	PSMD3	1	0.00633064	81.972	EHVK(1)QLEK	2	1.129	1	1537200	2325200	2.092
O43242	223	K	26S proteasome non-ATPase regulatory subunit 3	PSMD3	1	4.53404e-05	114.72	VYEFLDK(1)LDVVR	2	0.28134	1	17885000	14883000	0.966
O43252	567	K	Bifunctional 3'-phosphoadenosine 5'-phosphosulfate synthase 1	PAPSS1	1	0.0280088	67.741	VAAYNK(1)K	2	-0.22117	1	8191500	8726900	1.178
O43290	701	K	U4/U6.U5 tri-snRNP-associated protein 1	SART1	0.99992	0.00258681	101.39	EK(1)DGYKPDVK	2	0.16252	1	3050100	4440500	1.703
O43290	530	K	U4/U6.U5 tri-snRNP-associated protein 1	SART1	1	0.0249271	69.998	VVEIVK(1)K	2	0.51756	2	9990900	12917000	1.333
O43290	400	K	U4/U6.U5 tri-snRNP-associated protein 1	SART1	1	0.00472968	72.797	LASEYLTPEEMVTFK(1)K	2	-1.9453	1	0	16016000
O43291	242	K	Kunitz-type protease inhibitor 2	SPINT2	1	1.1106e-10	143.98	TVWSSGDDK(1)EQLVK	2	-0.018213	2	21278000	16076000	0.808
O43390	103	K	Heterogeneous nuclear ribonucleoprotein R	HNRNPR	1	3.26891e-09	146.36	SAFLCGVMK(1)TYR	2	-0.48033	2	8374100	9100400	0.93
O43390	259	K	Heterogeneous nuclear ribonucleoprotein R	HNRNPR	1	9.82162e-06	120.57	TK(1)ENILEEFSK	2	0.28986	2	27957000	23211000	0.845
O43390	366	K	Heterogeneous nuclear ribonucleoprotein R	HNRNPR	1	0.0276766	74.562	SFSEFGK(1)LER	2	-0.70567	1	0	6771200
O43390	374	K	Heterogeneous nuclear ribonucleoprotein R	HNRNPR	1	0.00134053	66.004	LK(1)DYAFVHFEDR	3	-0.16542	2	54058000	51025000	0.883
O43390	414	K	Heterogeneous nuclear ribonucleoprotein R	HNRNPR	0.999605	4.05713e-24	200.48	EIEGEEIEIVLAKPPDK(1)K	3	0.22697	5	113650000	127510000	1.017
O43390	285	K	Heterogeneous nuclear ribonucleoprotein R	HNRNPR	1	6.41771e-10	127.62	VTEGLVDVILYHQPDDK(1)K	3	1.5748	2	66042000	79367000	0.971
O43390	126	K	Heterogeneous nuclear ribonucleoprotein R	HNRNPR	1	0.00376833	101.72	GPDEAK(1)IK	2	0.29243	1	54174000	52839000	0.718
O43390	300	K	Heterogeneous nuclear ribonucleoprotein R	HNRNPR	1	7.80993e-08	117	GFCFLEYEDHK(1)SAAQAR	3	0.23604	2	33626000	26031000	0.783
O43395	376	K	U4/U6 small nuclear ribonucleoprotein Prp3	PRPF3	1	0.0178533	65.252	LALIAPK(1)K	2	0.31641	2	18629000	27531000	1.432
O43399	127	K	Tumor protein D54	TPD52L2	1	0.0009876	93.649	VTQSDLYK(1)K	2	-0.003711	2	19593000	19050000	0.871
O43399	70	K	Tumor protein D54	TPD52L2	1	0.0226887	55.112	QVLAAK(1)ER	2	-0.31038	2	15004000	20918000	1.182
O43399	78	K	Tumor protein D54	TPD52L2	1	0.0158539	79.451	HCGELK(1)R	2	-0.36376	2	2954400	4661000	1.647
O43491	191	K	Band 4.1-like protein 2	EPB41L2	1	0.00856265	75.738	LEGGAAK(1)R	2	0.47051	1	4012700	8421800	2.222
O43491	12	K	Band 4.1-like protein 2	EPB41L2	1	0.00438164	66.989	TTEVGSVSEVK(1)K	2	2.0289	1	2590900	5476700	2.521
O43542	17	K	DNA repair protein XRCC3	XRCC3	1	0.0591342	50.966	IIAAIK(1)K	2	1.2149	1	992120	2078300	2.515
O43583	197	K	Density-regulated protein	DENR	1	0.00745629	61.015	WPEVDDDSIEDLGEVK(1)K	2	-1.4632	1	0	7708900
O43598	113	K	2'-deoxynucleoside 5'-phosphate N-hydrolase 1	DNPH1	1	0.00940327	96.048	AVAFNK(1)R	2	0.021596	2	23384000	27275000	1.201
O43615	237	K	Mitochondrial import inner membrane translocase subunit TIM44	TIMM44	1	0.00668218	46.494	VFEPNEEALGVVLHK(1)DSK	3	0.5245	1	4959700	6173500	1.07
O43615	312	K	Mitochondrial import inner membrane translocase subunit TIM44	TIMM44	1	0.00922193	62.271	VDPAFDK(1)DR	2	-0.10097	2	9841800	10534000	0.996
O43615	187	K	Mitochondrial import inner membrane translocase subunit TIM44	TIMM44	1	0.00264159	73.951	ALSQGVESVK(1)K	2	-0.74553	2	6337800	7745800	1.318
O43617	156	K	Trafficking protein particle complex subunit 3	TRAPPC3	1	1.11455e-10	155.37	FVQDTLK(1)GDGVTEIR	2	1.4962	1	0	4765800
O43657	128	K	Tetraspanin-6	TSPAN6	1	0.0435565	47.574	NNYEK(1)ALK	2	0.29362	1	4237000	3847800	1.004
O43657	171	K	Tetraspanin-6	TSPAN6	1	2.37616e-11	155.09	DWTDTNYYSEK(1)GFPK	2	0.083499	2	5958300	4516300	0.931
O43660	484	K	Pleiotropic regulator 1	PLRG1	1	0.000230538	102.4	LLTAEADK(1)TIK	2	-1.0951	2	3941500	6496600	1.224
O43670	36	K	BUB3-interacting and GLEBS motif-containing protein ZNF207	ZNF207	1	0.0104789	60.019	HFK(1)CHICHK	2	-0.26402	1	968500	771000	1.051
O43670	24	K	BUB3-interacting and GLEBS motif-containing protein ZNF207	ZNF207	1	0.000655064	70.728	DFDDEK(1)ILIQHQK	3	-0.99493	1	29273000	17948000	0.942
O43670	100	K	BUB3-interacting and GLEBS motif-containing protein ZNF207	ZNF207	1	0.0520087	47.991	LLEQK(1)TQESQK	2	0.82028	1	934940	939990	0.989
O43674	152	K	NADH dehydrogenase [ubiquinone] 1 beta subcomplex subunit 5, mitochondrial	NDUFB5	1	0.0172146	73.26	VK(1)ELEVR	2	1.5403	1	49230000	35037000	0.744
O43678	98	K	NADH dehydrogenase [ubiquinone] 1 alpha subcomplex subunit 2	NDUFA2	1	0.031923	50.452	ALENVLSGK(1)A	2	1.0092	1	31131000	34611000	1.102
O43684	216	K	Mitotic checkpoint protein BUB3	BUB3	1	3.8393e-08	136.33	VAVEYLDPSPEVQK(1)K	2	-0.051199	2	9696700	11219000	1.078
O43707	643	K	Alpha-actinin-4	ACTN4	1	8.93581e-10	122.29	DHALLEEQSK(1)QQSNEHLR	3	0.69058	1	8891500	10896000	1.354
O43707	217	K	Alpha-actinin-4	ACTN4	1	2.79049e-39	232.15	K(1)DDPVTNLNNAFEVAEK	2	0.058529	5	18046000	31929000	1.243
O43707	239	K	Alpha-actinin-4	ACTN4	1	1.75392e-14	139.16	YLDIPK(1)MLDAEDIVNTARPDEK	3	0.98675	1	15770000	24044000	1.614
O43707	455	K	Alpha-actinin-4	ACTN4	1	8.8732e-35	241.64	K(1)HEAFESDLAAHQDR	3	0.0076702	4	179130000	233860000	1.298
O43707	632	K	Alpha-actinin-4	ACTN4	1	0.00528301	95.531	VQQLVPK(1)R	2	-0.12425	9	498250000	778880000	1.617
O43707	346	K	Alpha-actinin-4	ACTN4	0.999747	0.00121471	78.136	VHKPPK(1)VQEK	2	0.4027	2	20906000	33060000	1.602
O43707	122	K	Alpha-actinin-4	ACTN4	1	0.000890214	85.813	ALDFIASK(1)GVK	2	-0.80214	4	74054000	89750000	1.237
O43707	331	K	Alpha-actinin-4	ACTN4	1	2.63409e-31	239.19	TIQEMQQK(1)LEDFR	2	0.80987	3	34639000	42256000	1.232
O43707	535	K	Alpha-actinin-4	ACTN4	1	6.25181e-55	287.54	QLEAIDQLHLEYAK(1)R	2	0.32052	6	143160000	183800000	1.415
O43707	521	K	Alpha-actinin-4	ACTN4	1	1.38528e-09	133.9	TEK(1)QLEAIDQLHLEYAK	3	-0.536	3	61206000	91838000	1.428
O43707	859	K	Alpha-actinin-4	ACTN4	1	2.25083e-11	155.57	VLAGDK(1)NFITAEELR	2	-0.23653	4	182810000	235130000	1.02
O43707	214	K	Alpha-actinin-4	ACTN4	1	2.23964e-05	122.97	HRPELIEYDK(1)LR	2	0.97911	5	227860000	334990000	1.487
O43707	125	K	Alpha-actinin-4	ACTN4	1	1.75666e-09	131.45	GVK(1)LVSIGAEEIVDGNAK	2	0.36566	2	5058800	8100100	1.824
O43707	625	K	Alpha-actinin-4	ACTN4	1	0.00141402	80.037	WEK(1)VQQLVPK	2	0.35165	2	106200000	159190000	1.426
O43707	592	K	Alpha-actinin-4	ACTN4	1	1.21906e-06	134.61	EAILAIHK(1)EAQR	3	0.64121	3	35253000	54488000	1.466
O43707	50	K	Alpha-actinin-4	ACTN4	1	7.08065e-08	141.13	DLLLDPAWEK(1)QQR	2	1.6807	5	81395000	111730000	1.255
O43707	437	K	Alpha-actinin-4	ACTN4	1	0.0131696	79.939	EAMLK(1)HR	2	-1.6902	3	38870000	43698000	1.113
O43707	760	K	Alpha-actinin-4	ACTN4	1	4.36386e-11	156.24	DAK(1)GISQEQMQEFR	3	-1.0129	6	170790000	231860000	1.382
O43707	283	K	Alpha-actinin-4	ACTN4	1	1.48488e-15	157.85	ICK(1)VLAVNQENEHLMEDYEK	3	-0.95573	5	131310000	173610000	1.416
O43707	518	K	Alpha-actinin-4	ACTN4	1	0.000132591	143.22	REALEK(1)TEK	2	-1.2749	2	5167200	6899700	1.461
O43707	323	K	Alpha-actinin-4	ACTN4	1	1.3035e-13	179.8	VPQK(1)TIQEMQQK	2	-0.78682	2	3778600	7295700	1.718
O43707	108	K	Alpha-actinin-4	ACTN4	1	9.8319e-06	153.08	VHK(1)INNVNK	2	-0.0040034	2	4909700	5688600	1.278
O43707	114	K	Alpha-actinin-4	ACTN4	1	8.75355e-05	95.067	INNVNK(1)ALDFIASK	2	2.7111	2	22509000	29770000	1.383
O43707	417	K	Alpha-actinin-4	ACTN4	1	0.000132733	106.68	LDHLAEK(1)FR	3	0.46689	13	452830000	617510000	1.354
O43707	421	K	Alpha-actinin-4	ACTN4	1	1.20275e-06	126.51	QK(1)ASIHEAWTDGK	2	-1.3185	2	4743400	12649000	1.591
O43707	779	K	Alpha-actinin-4	ACTN4	1	7.68672e-20	165.03	ASFNHFDK(1)DHGGALGPEEFK	2	-0.76754	3	172730000	245170000	1.516
O43707	432	K	Alpha-actinin-4	ACTN4	1	5.47455e-32	227.67	ASIHEAWTDGK(1)EAMLK	3	-0.69652	6	265610000	410480000	1.424
O43707	66	K	Alpha-actinin-4	ACTN4	1	3.57566e-21	196.95	K(1)AGTQIENIDEDFR	2	0.72944	2	9047900	12618000	1.367
O43707	54	K	Alpha-actinin-4	ACTN4	1	0.0017135	85.536	K(1)TFTAWCNSHLR	2	1.9286	1	17251000	13128000	0.657
O43708	191	K	Maleylacetoacetate isomerase	GSTZ1	1	0.000228928	79.652	VDLTPYPTISSINK(1)R	2	0.69792	1	2979100	3725500	1.367
O43708	94	K	Maleylacetoacetate isomerase	GSTZ1	1	0.0187943	64.207	LLPQDPK(1)K	2	-0.84286	1	19934000	18004000	0.971
O43747	362	K	AP-1 complex subunit gamma-1	AP1G1	1	0.0137351	69.825	DLDVSIK(1)R	2	-1.0991	1	25589000	25776000	1.201
O43765	183	K	Small glutamine-rich tetratricopeptide repeat-containing protein alpha	SGTA	1	4.51573e-05	133.23	HVEAVAYYK(1)K	2	0.59217	2	6525300	12635000	1.912
O43776	99	K	Asparagine--tRNA ligase, cytoplasmic	NARS	1	0.039965	58.981	NLEEAK(1)K	2	0.12608	1	20119000	25440000	1.34
O43776	50	K	Asparagine--tRNA ligase, cytoplasmic	NARS	1	0.0104549	44.598	EPFPTIYVDSQK(1)ENER	3	-0.3822	1	7442600	10334000	1.326
O43776	129	K	Asparagine--tRNA ligase, cytoplasmic	NARS	1	0.0031854	57.859	VK(1)VFGWVHR	3	-0.0079531	1	4408300	7257700	1.172
O43776	507	K	Asparagine--tRNA ligase, cytoplasmic	NARS	1	0.00227835	52.112	K(1)YGTCPHGGYGLGLER	3	-0.41065	2	6379700	8723000	1.408
O43776	490	K	Asparagine--tRNA ligase, cytoplasmic	NARS	1	8.13359e-10	166.24	IFDSEEILAGYK(1)R	3	-0.39812	2	9200700	11316000	1.259
O43809	56	K	Cleavage and polyadenylation specificity factor subunit 5	NUDT21	1	2.37176e-09	148.62	EPLYEK(1)DSSVAAR	2	-1.4636	3	17948000	25904000	0.777
O43809	122	K	Cleavage and polyadenylation specificity factor subunit 5	NUDT21	1	2.32212e-09	130.27	LPGGELNPGEDEVEGLK(1)R	2	-0.38001	3	15295000	11183000	0.948
O43818	25	K	U3 small nucleolar RNA-interacting protein 2	RRP9	1	0.00286992	73.296	GKPASGAGAGAGAGK(1)R	2	-1.0686	2	3529500	4933100	1.633
O43823	474	K	A-kinase anchor protein 8	AKAP8	1	0.0247769	69.786	GIGQEHFFK(1)K	2	-0.031315	1	0	5209600
O43837	350	K	Isocitrate dehydrogenase [NAD] subunit beta, mitochondrial	IDH3B	1	2.98943e-13	147.17	HLNLEYHSSMIADAVK(1)K	3	-1.2344	2	29827000	25571000	1.12
O43837	207	K	Isocitrate dehydrogenase [NAD] subunit beta, mitochondrial	IDH3B	1	0.00811613	80.231	FAFDYATK(1)K	2	1.7335	3	30639000	32360000	1.168
O43852	59	K	Calumenin	CALU	1	2.61347e-22	138.8	VHNDAQSFDYDHDAFLGAEEAK(1)TFDQLTPEESK	4	-1.072	1	36842000	39335000	1.141
O43852	84	K	Calumenin	CALU	1	2.00308e-27	215.48	IDGDK(1)DGFVTVDELK	2	-1.38	12	188670000	237350000	1.291
O43852	281	K	Calumenin	CALU	1	4.92863e-18	200.76	HLVYESDQNK(1)DGK	2	0.84794	9	127170000	161380000	1.285
O43852	165	K	Calumenin	CALU	1	2.49613e-06	126.83	MADK(1)DGDLIATK	2	0.6457	6	94478000	126530000	1.266
O43852	37	K	Calumenin	CALU	1	1.0161e-23	142.9	VHHEPQLSDK(1)VHNDAQSFDYDHDAFLGAEEAK	5	-0.039747	4	71455000	83103000	1.205
O43852	255	K	Calumenin	CALU	0.996899	1.04736e-09	113.31	MDK(0.003)EETK(0.997)DWILPSDYDHAEAEAR	3	-0.29491	2	22818000	36735000	1.751
O43854	235	K	EGF-like repeat and discoidin I-like domain-containing protein 3	EDIL3	1	0.00904844	63.473	VTGVITQGAK(1)R	2	0.2749	1	1658100	1610400	1.166
O43865	486	K	Putative adenosylhomocysteinase 2	AHCYL1	1	0.0432079	61.691	QDVYLLPK(1)K	2	2.0239	1	0	5055500
O43920	8	K	NADH dehydrogenase [ubiquinone] iron-sulfur protein 5	NDUFS5	1	0.00104135	133.6	PFLDIQK(1)R	2	0.13335	2	25471000	37847000	1.087
O60216	330	K	Double-strand-break repair protein rad21 homolog	RAD21	1	0.00100053	77.185	LIVDSVK(1)ELDSK	2	0.5807	1	5073500	3422200	0.98
O60218	27	K	Aldo-keto reductase family 1 member B10	AKR1B10	1	0.0355516	58.981	SPLGK(1)VK	2	-1.2762	2	6536200	10954000	1.737
O60218	128	K	Aldo-keto reductase family 1 member B10	AKR1B10	1	0.0035246	72.321	DDK(1)GNAIGGK	2	0.31237	3	71257000	127090000	1.485
O60218	233	K	Aldo-keto reductase family 1 member B10	AKR1B10	1	1.39501e-18	206.32	PEDPSLLEDPK(1)IK	2	1.0461	5	88616000	155050000	2.134
O60218	33	K	Aldo-keto reductase family 1 member B10	AKR1B10	1	0.000224248	90.697	EAVK(1)VAIDAGYR	2	0.056299	2	29310000	35431000	1.463
O60218	95	K	Aldo-keto reductase family 1 member B10	AKR1B10	1	0.00602061	105.39	AFEK(1)TLK	2	-0.17796	8	328140000	479080000	1.411
O60218	263	K	Aldo-keto reductase family 1 member B10	AKR1B10	1	0.00819371	54.09	NVIVIPK(1)SVTPAR	2	0.039437	1	6294500	8020100	1.426
O60218	12	K	Aldo-keto reductase family 1 member B10	AKR1B10	1	0.000161832	100.38	AK(1)MPIVGLGTWK	2	-0.37456	2	68597000	94228000	1.611
O60218	22	K	Aldo-keto reductase family 1 member B10	AKR1B10	1	0.0508138	42.314	MPIVGLGTWK(1)SPLGK	2	-0.39783	1	14056000	18198000	1.446
O60218	173	K	Aldo-keto reductase family 1 member B10	AKR1B10	1	0.00453316	94.874	LLNK(1)PGLK	2	-0.15008	2	30915000	49836000	1.564
O60218	125	K	Aldo-keto reductase family 1 member B10	AKR1B10	1	0.000951233	84.605	SGDDLFPK(1)DDK	2	0.026173	1	10706000	14512000	1.559
O60218	66	K	Aldo-keto reductase family 1 member B10	AKR1B10	1	0.0055221	108.24	IQEK(1)AVK	2	-0.6749	2	206690000	302330000	1.525
O60218	169	K	Aldo-keto reductase family 1 member B10	AKR1B10	0.999887	2.67225e-11	118.19	ALGVSNFSHFQIEK(1)LLNKPGLK	4	-0.47995	1	0	137460000
O60218	10	K	Aldo-keto reductase family 1 member B10	AKR1B10	1	5.62826e-06	147.91	ATFVELSTK(1)AK	2	1.3147	3	38050000	56050000	1.499
O60218	62	K	Aldo-keto reductase family 1 member B10	AKR1B10	1	3.72363e-34	197.28	HIDCAYVYQNEHEVGEAIQEK(1)IQEK	4	-1.7025	3	52096000	77213000	1.572
O60218	195	K	Aldo-keto reductase family 1 member B10	AKR1B10	1	6.26929e-15	123.65	YKPVTNQVECHPYLTQEK(1)LIQYCHSK	4	1.114	2	21628000	40129000	1.92
O60229	139	K	Kalirin	KALRN	1	0.0315527	48.794	QK(1)TNFGSSK	2	-0.13791	3	215990000	315630000	1.503
O60238	135	K	BCL2/adenovirus E1B 19 kDa protein-interacting protein 3-like	BNIP3L	1	0.039965	58.981	EVEALK(1)K	2	0.93584	1	16951000	15015000	0.879
O60264	966	K	SWI/SNF-related matrix-associated actin-dependent regulator of chromatin subfamily A member 5	SMARCA5	1	0.000100069	98.592	LGFDK(1)ENVYDELR	2	1.1239	2	5080000	8346200	1.803
O60264	990	K	SWI/SNF-related matrix-associated actin-dependent regulator of chromatin subfamily A member 5	SMARCA5	1	0.00400721	99.136	FDWFLK(1)SR	2	0.70095	1	8252800	9822500	1.206
O60264	264	K	SWI/SNF-related matrix-associated actin-dependent regulator of chromatin subfamily A member 5	SMARCA5	1	0.00260701	80.245	SVCLIGDK(1)EQR	2	0.55673	1	0	0
O60264	496	K	SWI/SNF-related matrix-associated actin-dependent regulator of chromatin subfamily A member 5	SMARCA5	1	0.0101623	89.142	LK(1)EQGSR	2	1.2909	1	1836800	1823000	1.002
O60264	490	K	SWI/SNF-related matrix-associated actin-dependent regulator of chromatin subfamily A member 5	SMARCA5	1	0.00714849	66.056	MVVLDK(1)LLPK	2	-0.15857	2	5157700	6085700	1.214
O60271	547	K	C-Jun-amino-terminal kinase-interacting protein 4	SPAG9	1	0.00044513	114.97	ENPAMQEK(1)K	2	-0.49336	2	5561400	14576000	2.963
O60271	590	K	C-Jun-amino-terminal kinase-interacting protein 4	SPAG9	1	1.43685e-05	124.16	YNAPTSHVTPSVK(1)K	2	-0.15902	1	0	1523000
O60271	102	K	C-Jun-amino-terminal kinase-interacting protein 4	SPAG9	1	0.000366807	77.478	HAEEK(1)FIEFEDSQEQEK	3	-0.66245	1	0	9375300
O60271	114	K	C-Jun-amino-terminal kinase-interacting protein 4	SPAG9	1	2.49093e-10	182.07	FIEFEDSQEQEK(1)K	2	-0.50141	2	3486600	15919000	2.226
O60271	603	K	C-Jun-amino-terminal kinase-interacting protein 4	SPAG9	1	0.0059952	90.707	SSTLSQLPGDK(1)SK	2	-0.18041	1	0	15787000
O60287	2141	K	Nucleolar pre-ribosomal-associated protein 1	URB1	1	7.13289e-06	80.236	SHILPHPVVVADLLK(1)DSAVR	3	0.4593	1	4620600	7621100	1.397
O60287	185	K	Nucleolar pre-ribosomal-associated protein 1	URB1	1	0.00123242	89.886	TLYTLVTK(1)R	2	0.43063	1	3344200	4888300	1.119
O60313	204	K	Dynamin-like 120 kDa protein, mitochondrial	OPA1	1	0.00132448	84.615	GSESDK(1)HFR	2	-1.3393	1	985610	1229200	1.239
O60313	342	K	Dynamin-like 120 kDa protein, mitochondrial	OPA1	1	0.00122181	55.437	VTLSEGPHHVALFK(1)DSSR	3	-1.2044	1	6365800	5857100	0.976
O60337	881	K	E3 ubiquitin-protein ligase MARCH6	MARCH6	1	0.0039544	71.708	NDK(1)YLVGQR	2	0.2642	2	4495000	6148100	1.17
O60343	215	K	TBC1 domain family member 4	TBC1D4	1	0.0469132	53.891	VTVTHK(1)K	2	-0.98905	1	726940	613870	0.878
O60488	426	K	Long-chain-fatty-acid--CoA ligase 4	ACSL4	1	0.000669613	75.102	GYDAPLCNLLLFK(1)K	2	-0.40015	1	3963000	7564800	2.213
O60488	690	K	Long-chain-fatty-acid--CoA ligase 4	ACSL4	1	1.42769e-05	88.176	LSPEPWTPETGLVTDAFK(1)LK	2	-1.2817	1	2051500	4975000	2.855
O60488	500	K	Long-chain-fatty-acid--CoA ligase 4	ACSL4	0.999986	0.00492915	48.907	LK(1)DWQEGGYTINDKPNPR	3	-1.3858	1	2266100	5471600	2.877
O60488	54	K	Long-chain-fatty-acid--CoA ligase 4	ACSL4	1	0.0010613	96.135	AKPTSDK(1)PGSPYR	2	-0.035538	1	3897900	8550000	2.359
O60506	81	K	Heterogeneous nuclear ribonucleoprotein Q	SYNCRIP	1	1.96127e-22	163.92	EFNEDGALAVLQQFK(1)DSDLSHVQNK	3	0.20417	2	28632000	32225000	1.176
O60506	363	K	Heterogeneous nuclear ribonucleoprotein Q	SYNCRIP	1	0.00497215	96.171	AFSQFGK(1)LER	2	-0.18891	2	10713000	17971000	0.97
O60506	283	K	Heterogeneous nuclear ribonucleoprotein Q	SYNCRIP	0.817863	9.80433e-06	77.899	VTEGLTDVILYHQPDDK(0.182)K(0.818)K	3	0.64177	2	11701000	11636000	1.097
O60506	282	K	Heterogeneous nuclear ribonucleoprotein Q	SYNCRIP	1	9.52116e-11	139.88	VTEGLTDVILYHQPDDK(1)K	3	-2.7425	1	32370000	32355000	1.035
O60506	256	K	Heterogeneous nuclear ribonucleoprotein Q	SYNCRIP	1	5.85045e-05	116.03	TK(1)EQILEEFSK	2	0.44866	2	27194000	28670000	1.029
O60524	317	K	Nuclear export mediator factor NEMF	NEMF	1	0.00553396	68.847	ALQQEK(1)QALK	2	0.81883	1	1915000	1951800	1.417
O60568	215	K	Procollagen-lysine,2-oxoglutarate 5-dioxygenase 3	PLOD3	1	0.00635248	57.203	LSLNLDHK(1)SR	2	0.2401	2	8595100	9747300	1.062
O60568	207	K	Procollagen-lysine,2-oxoglutarate 5-dioxygenase 3	PLOD3	1	0.00154358	77.744	EK(1)LSLNLDHK	2	-0.40679	2	3807600	3285300	0.902
O60610	527	K	Protein diaphanous homolog 1	DIAPH1	1	2.89757e-05	94.023	DALHSEK(1)QQIATEK	3	0.70447	2	4509400	14401000	1.474
O60610	1127	K	Protein diaphanous homolog 1	DIAPH1	1	0.000151756	104.59	ELGEYFLFDPK(1)K	2	1.4266	4	19397000	33244000	1.391
O60610	486	K	Protein diaphanous homolog 1	DIAPH1	1	0.0424269	57.177	AAELEK(1)K	2	1.0608	1	5882500	10451000	1.669
O60664	164	K	Perilipin-3	PLIN3	1	0.00188185	74.611	GAVQSGVDK(1)TK	2	-1.4313	3	36554000	53286000	1.593
O60664	122	K	Perilipin-3	PLIN3	1	0.00037626	92.856	VLADTK(1)ELVSSK	2	0.75925	2	16612000	29361000	1.762
O60664	314	K	Perilipin-3	PLIN3	0.998511	0.000174303	72.21	QLQGPEK(0.999)EPPK(0.001)PEQVESR	3	0.78764	1	5277800	12003000	2.639
O60664	65	K	Perilipin-3	PLIN3	1	9.46538e-06	121.36	TVCDAAEK(1)GVR	2	-0.14467	2	46202000	74510000	1.653
O60701	370	K	UDP-glucose 6-dehydrogenase	UGDH	1	1.11416e-07	103.88	YLMDEGAHLHIYDPK(1)VPR	4	0.16464	3	43811000	43194000	1.12
O60701	339	K	UDP-glucose 6-dehydrogenase	UGDH	1	0.00479077	71.451	IAILGFAFK(1)K	2	-0.53386	2	54927000	58081000	1.043
O60701	330	K	UDP-glucose 6-dehydrogenase	UGDH	1	0.0286116	67.334	K(1)IAILGFAFK	2	-1.4115	1	0	5131100
O60701	107	K	UDP-glucose 6-dehydrogenase	UGDH	1	0.000127589	104.59	AADLK(1)YIEACAR	2	-0.026862	1	28746000	29961000	1.078
O60701	464	K	UDP-glucose 6-dehydrogenase	UGDH	1	4.11384e-14	134.87	VLDGLHNELQTIGFQIETIGK(1)K	3	0.02044	2	156400000	149190000	0.972
O60701	173	K	UDP-glucose 6-dehydrogenase	UGDH	1	0.0114293	85.265	DLK(1)NPDR	2	-0.14814	2	45950000	41248000	0.94
O60701	329	K	UDP-glucose 6-dehydrogenase	UGDH	1	1.66756e-13	170.18	IIDSLFNTVTDK(1)K	3	-0.85396	8	139350000	326530000	1.018
O60701	100	K	UDP-glucose 6-dehydrogenase	UGDH	1	0.015758	64.265	TYGMGK(1)GR	2	-0.68919	1	11796000	12648000	1.016
O60716	421	K	Catenin delta-1	CTNND1	1	8.74531e-05	81.789	GIPVLVGLLDHPK(1)K	2	1.5028	3	7873700	13327000	1.546
O60716	383	K	Catenin delta-1	CTNND1	1	1.14585e-10	139.49	LDAVK(1)SNAAAYLQHLCYR	3	0.2966	1	16180000	22092000	1.321
O60716	648	K	Catenin delta-1	CTNND1	1	0.000308165	81.346	KPIEDPANDTVDFPK(1)R	3	0.25006	1	0	14656000
O60716	622	K	Catenin delta-1	CTNND1	1	9.52291e-10	101.16	YQEAAPNVANNTGPHAASCFGAK(1)K	3	-0.1354	1	5670200	9688800	1.549
O60716	744	K	Catenin delta-1	CTNND1	1	0.0276033	64.207	NK(1)ELIGK	2	-1.1303	1	13881000	17742000	1.217
O60749	426	K	Sorting nexin-2	SNX2	1	5.35848e-05	117.09	WEDAQITLLK(1)K	2	0.65267	2	8952000	15050000	1.73
O60749	404	K	Sorting nexin-2	SNX2	1	0.0142405	43.604	LIAAVK(1)GVFDHR	3	-0.88033	1	3670300	5522000	1.442
O60763	618	K	General vesicular transport factor p115	USO1	1	0.00108692	81.92	LVK(1)ELEGVITK	2	0.39874	2	3780600	3342700	1.08
O60763	815	K	General vesicular transport factor p115	USO1	1	6.5195e-06	127.87	LQTEK(1)QELLQK	2	0.85979	1	10176000	12595000	1.258
O60763	903	K	General vesicular transport factor p115	USO1	1	5.36561e-07	165.64	DKLELEITDSK(1)K	2	-0.96089	2	10502000	48543000	1.482
O60814	121	K	Histone H2B type 1-K	HIST1H2BK	1	0.0139777	53.751	AVTK(1)YTSAK	2	-0.28241	1	6500900	7445900	1.24
O60832	11	K	H/ACA ribonucleoprotein complex subunit 4	DKC1	1	0.000726724	88.596	ADAEVIILPK(1)K	2	0.063261	1	16858000	13114000	0.839
O60832	302	K	H/ACA ribonucleoprotein complex subunit 4	DKC1	1	0.00302298	56.514	LVMK(1)DSAVNAICYGAK	2	1.4707	1	5376200	4087700	0.877
O60832	291	K	H/ACA ribonucleoprotein complex subunit 4	DKC1	1	7.53088e-05	91.62	VVYPLEK(1)LLTSHK	3	1.3208	1	8578100	7757500	0.781
O60832	151	K	H/ACA ribonucleoprotein complex subunit 4	DKC1	1	3.85842e-05	98.676	SQQSAGK(1)EYVGIVR	2	0.65156	1	9492300	6119200	0.794
O60832	424	K	H/ACA ribonucleoprotein complex subunit 4	DKC1	1	4.62691e-09	142.97	QEYVDYSESAK(1)K	2	-0.095268	2	5401200	4482900	0.815
O60832	80	K	H/ACA ribonucleoprotein complex subunit 4	DKC1	1	1.55722e-07	116.58	TTHYTPLACGSNPLK(1)R	3	-1.0098	2	13451000	17335000	1.112
O60832	394	K	H/ACA ribonucleoprotein complex subunit 4	DKC1	1	0.00432237	70.942	LMIK(1)QGLLDK	2	-1.3905	2	4074800	2330300	1.204
O60832	425	K	H/ACA ribonucleoprotein complex subunit 4	DKC1	1	0.00897261	65.278	K(1)EVVAEVVK	2	-0.59896	1	13122000	9947900	0.81
O60832	297	K	H/ACA ribonucleoprotein complex subunit 4	DKC1	1	0.00322656	125.08	LLTSHK(1)R	2	-0.97447	2	8861900	10197000	0.966
O60841	1015	K	Eukaryotic translation initiation factor 5B	EIF5B	1	2.37977e-05	98.676	TSEVPYAGINIGPVHK(1)K	3	0.0010364	2	6744500	39073000	1.728
O60841	921	K	Eukaryotic translation initiation factor 5B	EIF5B	1	0.046407	51.787	NQYEK(1)HK	2	0.29443	1	1001200	1870600	2.015
O60869	102	K	Endothelial differentiation-related factor 1	EDF1	1	0.000136101	85.576	INEK(1)PQVIADYESGR	2	1.1684	3	6258900	30438000	2.054
O60870	240	K	DNA/RNA-binding protein KIN17	KIN	1	0.057026	54.486	TIGSSASVK(1)R	2	1.6468	1	0	0
O60888	82	K	Protein CutA	CUTA	1	0.0100882	89.369	VAK(1)EIAR	2	-0.63359	1	4981900	6360000	1.335
O75027	614	K	ATP-binding cassette sub-family B member 7, mitochondrial	ABCB7	1	0.0203275	58.23	LSGGEK(1)QR	2	0.25938	2	4650000	4385600	0.869
O75083	155	K	WD repeat-containing protein 1	WDR1	1	3.61969e-05	117.79	VINSVDIK(1)QSR	2	1.3781	2	4924700	4421400	0.978
O75083	484	K	WD repeat-containing protein 1	WDR1	1	0.0124167	56.548	DEGK(1)LLEAK	2	-0.42089	2	8287400	10970000	1.414
O75083	256	K	WD repeat-containing protein 1	WDR1	1	3.25174e-12	110.78	AHDGGIYAISWSPDSTHLLSASGDK(1)TSK	4	0.33922	1	14108000	18597000	1.478
O75083	489	K	WD repeat-containing protein 1	WDR1	1	5.13014e-11	105.55	LLEAK(1)GPVTDVAYSHDGAFLAVCDASK	3	-1.2888	1	9327000	12770000	1.382
O75083	480	K	WD repeat-containing protein 1	WDR1	1	0.00226367	69.261	LYSILGTTLK(1)DEGK	2	-1.5238	1	9654600	10920000	0.986
O75083	115	K	WD repeat-containing protein 1	WDR1	1	0.000176471	115.78	DIAWTEDSK(1)R	2	-0.64912	2	23493000	30310000	1.205
O75131	253	K	Copine-3	CPNE3	1	6.89106e-14	179.67	SSPVEFECINEK(1)K	2	-0.15446	4	28464000	56395000	1.893
O75131	208	K	Copine-3	CPNE3	1	1.36533e-05	93.181	ISLNSLCYGDMDK(1)TIK	2	-0.25815	2	5738500	10301000	1.772
O75152	300	K	Zinc finger CCCH domain-containing protein 11A	ZC3H11A	1	0.0388512	55.196	FSAGGDSDPPLK(1)R	2	-3.6016	1	0	0
O75153	740	K	Clustered mitochondria protein homolog	CLUH	1	0.0122769	82.671	DQK(1)QLLK	2	-0.46887	1	4508500	3977000	0.881
O75153	1170	K	Clustered mitochondria protein homolog	CLUH	1	0.00182132	54.09	SALQHEK(1)EGYTIYK	3	-0.063195	1	4443300	7540700	1.765
O75157	3	K	TSC22 domain family protein 2	TSC22D2	0.977751	0.0439144	42.396	MSK(0.978)MPAK(0.022)K	2	-1.283	1	10350000	16063000	3.542
O75208	175	K	Ubiquinone biosynthesis protein COQ9, mitochondrial	COQ9	1	0.000136776	118.03	LVQLGQAEK(1)R	2	-0.10986	2	47355000	30526000	0.675
O75223	181	K	Gamma-glutamylcyclotransferase	GGCT	1	0.000337939	98.156	VSEEIEDIIK(1)K	2	-1.0371	1	6645400	9849300	1.812
O75306	362	K	NADH dehydrogenase [ubiquinone] iron-sulfur protein 2, mitochondrial	NDUFS2	1	0.0103056	60.598	VDDAK(1)VSPPK	2	-0.0043584	2	10452000	10373000	1.061
O75306	437	K	NADH dehydrogenase [ubiquinone] iron-sulfur protein 2, mitochondrial	NDUFS2	1	2.93598e-05	88.561	APGFAHLAGLDK(1)MSK	3	0.15489	1	15783000	13969000	1.285
O75323	67	K	Protein NipSnap homolog 2	GBAS	1	4.04635e-06	149.33	KDAHSNLLAK(1)K	2	1.3745	3	12950000	11538000	0.86
O75323	148	K	Protein NipSnap homolog 2	GBAS	1	0.00114989	87.806	ENK(1)EFLEFR	2	1.3635	2	12312000	11957000	0.977
O75340	112	K	Programmed cell death protein 6	PDCD6	1	0.000152443	101.53	DNSGMIDK(1)NELK	2	-1.451	1	4825500	7423800	1.251
O75347	28	K	Tubulin-specific chaperone A	TBCA	1	0.0208124	57.59	VMYEK(1)EAK	2	1.5639	1	2291500	5083500	1.762
O75347	23	K	Tubulin-specific chaperone A	TBCA	1	0.0355803	49.933	EK(1)VMYEK	2	-0.33036	1	8170900	16114000	1.692
O75352	10	K	Mannose-P-dolichol utilization defect 1 protein	MPDU1	1	0.000896259	106.18	AAEADGPLK(1)R	2	0.11212	3	21980000	23326000	0.805
O75367	304	K	Core histone macro-H2A.1	H2AFY	1	0.00113771	88.134	NCLALADDK(1)K	2	-1.0636	2	11692000	13667000	1.089
O75367	18	K	Core histone macro-H2A.1	H2AFY	1	0.000916932	79.283	SAK(1)AGVIFPVGR	2	-1.0587	2	27180000	28484000	0.969
O75367	116	K	Core histone macro-H2A.1	H2AFY	1	6.27138e-16	144.72	GVTIASGGVLPNIHPELLAK(1)K	3	0.32075	4	140020000	150660000	1.12
O75367	134	K	Core histone macro-H2A.1	H2AFY	1	0.0105614	65.374	LEAIITPPPAK(1)K	2	-0.40318	5	29027000	31774000	1.161
O75367	307	K	Core histone macro-H2A.1	H2AFY	1	0.00397373	66.215	LK(1)SIAFPSIGSGR	2	0.10853	1	13904000	16719000	1.202
O75367	285	K	Core histone macro-H2A.1	H2AFY	1	5.54624e-16	147.25	FVIHCNSPVWGADK(1)CEELLEK	3	0.64203	2	58434000	59687000	1.018
O75367	235	K	Core histone macro-H2A.1	H2AFY	1	0.0296588	66.664	DDLGNTLEK(1)K	2	1.9975	1	0	56361000
O75368	17	K	SH3 domain-binding glutamic acid-rich-like protein	SH3BGRL	1	1.58345e-06	119.25	VYIASSSGSTAIK(1)K	2	-0.016549	2	28285000	29730000	1.113
O75369	2170	K	Filamin-B	FLNB	1	8.53624e-07	101.53	FVPQEMGVHTVSVK(1)YR	3	0.78517	4	19827000	39001000	2.169
O75369	677	K	Filamin-B	FLNB	1	0.0452188	47.082	DAGK(1)APLK	2	-1.0687	1	5044400	10469000	2.072
O75369	2514	K	Filamin-B	FLNB	1	0.000267158	99.5	ASSDASK(1)VTSK	2	0.68418	2	7478600	16125000	2.161
O75369	1780	K	Filamin-B	FLNB	1	7.43323e-18	166.48	TATPEIVDNK(1)DGTVTVR	2	2.0893	5	78293000	180270000	2.337
O75369	1241	K	Filamin-B	FLNB	1	1.64153e-06	120.84	VFGPGIEGK(1)DVFR	2	0.053965	4	32927000	64418000	1.891
O75369	2322	K	Filamin-B	FLNB	1	2.57935e-14	125.35	IDAK(1)VHSPSGAVEECHVSELEPDK	3	0.38796	1	3438300	8888700	2.576
O75369	946	K	Filamin-B	FLNB	1	3.05653e-25	207.39	SPFTVGVAAPLDLSK(1)IK	2	-0.65487	2	37305000	101050000	2.618
O75369	272	K	Filamin-B	FLNB	1	0.00223719	69.352	GIEPTGNMVK(1)QPAK	2	1.0155	1	2036600	6951900	2.782
O75369	746	K	Filamin-B	FLNB	1	0.00119791	83.862	VK(1)VFGPGVER	2	-0.16345	3	18442000	55490000	2.244
O75369	1232	K	Filamin-B	FLNB	1	0.00863177	61.48	IK(1)VFGPGIEGK	2	0.00043666	1	26957000	52692000	2.12
O75369	2530	K	Filamin-B	FLNB	1	1.87375e-05	99.927	AFVGQK(1)SSFLVDCSK	2	0.73474	1	5937200	12595000	2.588
O75369	1564	K	Filamin-B	FLNB	0.859078	4.71942e-15	149.36	DAGEGLLAVQITDQEGK(0.141)PK(0.859)R	3	1.3427	2	6026800	40145000	2.11
O75369	313	K	Filamin-B	FLNB	1	0.000688521	89.805	NK(1)TYSVEYLPK	2	3.5614	1	37178000	42146000	1.047
O75369	551	K	Filamin-B	FLNB	1	2.55047e-08	138.91	SPFEVQVGPEAGMQK(1)VR	3	-1.3827	2	5076900	23300000	2.455
O75369	31	K	Filamin-B	FLNB	1	3.4536e-15	202.05	WCNEHLK(1)CVNK	2	-0.57474	2	2836200	6187800	2.355
O75369	1897	K	Filamin-B	FLNB	1	9.64276e-08	133.16	YNDK(1)HIPGSPFTAK	2	-0.20501	1	15146000	40188000	2.568
O75369	607	K	Filamin-B	FLNB	1	5.06038e-07	100.04	IEYNDQNDGSCDVK(1)YWPK	2	-0.031025	1	4489100	7257500	2.268
O75369	1135	K	Filamin-B	FLNB	1	2.82336e-11	113.73	ADIEMPFDPSK(1)VVASGPGLEHGK	3	-1.2369	5	24722000	202440000	2.229
O75369	349	K	Filamin-B	FLNB	1	7.25785e-71	302.15	SPFEVSVDK(1)AQGDASK	2	-0.55308	7	52106000	120980000	2.069
O75369	847	K	Filamin-B	FLNB	1	0.000196028	105.13	VDPSHDASK(1)VK	3	0.35039	4	45366000	104170000	2.312
O75369	2235	K	Filamin-B	FLNB	1	7.52838e-05	59.912	EAGAGGLSIAVEGPSK(1)AEITFDDHK	3	1.7863	1	0	6309400
O75369	6	K	Filamin-B	FLNB	1	7.38756e-16	181.75	PVTEK(1)DLAEDAPWK	2	-0.15381	2	24276000	65532000	3.03
O75369	476	K	Filamin-B	FLNB	1	0.0307666	73.327	ETTDFK(1)VDTK	2	-2.635	1	0	9434900
O75369	1584	K	Filamin-B	FLNB	1	0.00163481	96.247	DGTYAVTYIPDK(1)TGR	2	-2.2918	1	0	12691000
O75369	1616	K	Filamin-B	FLNB	1	1.27074e-29	199.6	ATQTGDASK(1)CLATGPGIASTVK	3	0.024071	2	2406000	36849000	2.781
O75369	15	K	Filamin-B	FLNB	1	0.000397256	103.26	DLAEDAPWK(1)K	2	1.2906	9	88468000	142600000	1.608
O75369	681	K	Filamin-B	FLNB	1	2.65541e-06	118.52	APLK(1)IFAQDGEGQR	2	2.1689	2	8158800	30530000	1.98
O75369	1955	K	Filamin-B	FLNB	1	0.0151855	68.214	DEPCLLK(1)R	2	-0.47424	1	18008000	35748000	2.22
O75369	1572	K	Filamin-B	FLNB	1	4.59225e-36	229.48	AIVHDNK(1)DGTYAVTYIPDK	3	1.9087	6	118940000	293020000	2.476
O75369	356	K	Filamin-B	FLNB	1	0.000762638	88.338	AQGDASK(1)VTAK	2	0.5272	2	10950000	24777000	2.264
O75369	2342	K	Filamin-B	FLNB	1	2.71595e-14	121.21	VHSPSGAVEECHVSELEPDK(1)YAVR	4	-0.78092	4	21186000	56741000	2.191
O75369	1979	K	Filamin-B	FLNB	1	2.68219e-10	169.65	EVGEHLVSIK(1)K	2	-1.4216	5	318310000	669820000	2.119
O75369	60	K	Filamin-B	FLNB	1	2.52075e-17	194.17	LIALLEVLSQK(1)R	3	-0.85862	4	48160000	85144000	1.74
O75369	1449	K	Filamin-B	FLNB	1	1.14279e-07	116.39	VLQSFTVDSSK(1)AGLAPLEVR	2	-0.10658	1	0	20839000
O75369	657	K	Filamin-B	FLNB	1	4.57185e-12	120.33	AYGPGLEK(1)SGCIVNNLAEFTVDPK	3	-0.20259	1	0	10120000
O75369	1379	K	Filamin-B	FLNB	1	5.84536e-22	122.08	DNK(1)DGSCSAEYIPFAPGDYDVNITYGGAHIPGSPFR	3	0.5631	2	15342000	23778000	1.679
O75369	409	K	Filamin-B	FLNB	1	6.77203e-71	303.3	NTVELLVEDK(1)GNQVYR	3	-0.17217	4	22722000	42109000	1.985
O75369	340	K	Filamin-B	FLNB	1	7.70052e-07	84.689	VTVLFAGQHISK(1)SPFEVSVDK	3	1.0263	1	0	26646000
O75380	49	K	NADH dehydrogenase [ubiquinone] iron-sulfur protein 6, mitochondrial	NDUFS6	1	2.16859e-07	122.08	VTHTGQVYDDK(1)DYR	2	-0.42318	2	28576000	27245000	1.023
O75380	105	K	NADH dehydrogenase [ubiquinone] iron-sulfur protein 6, mitochondrial	NDUFS6	1	0.000976017	87.789	VYINLDK(1)ETK	2	0.96516	2	17061000	16592000	0.964
O75390	327	K	Citrate synthase, mitochondrial	CS	1	0.00596896	84.568	DVSDEK(1)LR	2	-0.4355	2	57501000	65362000	1.096
O75390	215	K	Citrate synthase, mitochondrial	CS	1	0.0355649	61.161	LPCVAAK(1)IYR	2	0.010343	1	2559500	2874100	1.342
O75390	366	K	Citrate synthase, mitochondrial	CS	1	3.10794e-15	167.03	EFALK(1)HLPNDPMFK	2	-0.5953	1	2762600	3942800	1.617
O75390	459	K	Citrate synthase, mitochondrial	CS	1	7.34023e-05	95.854	SMSTEGLMK(1)FVDSK	2	0.82252	2	4712300	5520200	1.234
O75391	67	K	Sperm-associated antigen 7	SPAG7	1	1.34189e-05	113.76	EVSDFIQDSGQIK(1)K	2	1.1545	1	3731900	3121700	1.064
O75394	59	K	39S ribosomal protein L33, mitochondrial	MRPL33	1	0.0444761	55.676	VLFVEK(1)K	2	0.74202	1	27831000	29641000	0.918
O75396	169	K	Vesicle-trafficking protein SEC22b	SEC22B	1	0.0252014	45.237	GEALSALDSK(1)ANNLSSLSK	2	2.573	1	4080100	3404400	0.851
O75396	178	K	Vesicle-trafficking protein SEC22b	SEC22B	1	0.00514108	70.942	ANNLSSLSK(1)K	2	-0.18149	1	11200000	9592800	0.781
O75400	464	K	Pre-mRNA-processing factor 40 homolog A	PRPF40A	1	0.0117192	69.598	EAK(1)ESFQR	2	1.252	2	4949400	4478100	0.904
O75475	39	K	PC4 and SFRS1-interacting protein	PSIP1	0.994042	3.87268e-07	72.687	VDEVPDGAVK(0.006)PPTNK(0.994)LPIFFFGTHETAFLGPK	4	0.071399	1	19585000	31210000	1.877
O75477	190	K	Erlin-1	ERLIN1	1	0.00661856	74.077	NFELMEAEK(1)TK	2	1.6941	1	8769300	9436300	1.146
O75489	259	K	NADH dehydrogenase [ubiquinone] iron-sulfur protein 3, mitochondrial	NDUFS3	0.77622	0.0479212	65.241	LEAGDK(0.776)K(0.224)PDAK	2	-0.19569	1	672210	760490	0.985
O75521	304	K	Enoyl-CoA delta isomerase 2, mitochondrial	ECI2	1	0.00178137	78.556	ATEMLIFGK(1)K	2	-0.58899	2	48055000	64312000	1.236
O75531	32	K	Barrier-to-autointegration factor	BANF1	1	6.8721e-09	119.45	PVGSLAGIGEVLGK(1)K	2	-0.056394	4	146400000	200620000	1.38
O75531	18	K	Barrier-to-autointegration factor	BANF1	1	7.32774e-07	80.786	DFVAEPMGEK(1)PVGSLAGIGEVLGK	3	0.53996	2	7589100	8205300	1.508
O75531	54	K	Barrier-to-autointegration factor	BANF1	1	0.0167841	77.058	K(1)DEDLFR	2	0.4033	3	63709000	81935000	1.243
O75533	1030	K	Splicing factor 3B subunit 1	SF3B1	1	0.00709629	48.899	HEK(1)VQENCIDLVGR	3	1.5144	1	5119900	9248700	1.859
O75533	333	K	Splicing factor 3B subunit 1	SF3B1	1	0.000362497	95.236	GGDSIGETPTPGASK(1)R	2	1.2134	1	0	2687800
O75533	1292	K	Splicing factor 3B subunit 1	SF3B1	1	5.19301e-05	116.55	IYNDDK(1)NTYIR	2	1.2522	3	15599000	15621000	0.944
O75533	213	K	Splicing factor 3B subunit 1	SF3B1	1	4.09652e-16	181.75	WDQTADQTPGATPK(1)K	2	0.084171	2	3947400	6300400	1.414
O75533	146	K	Splicing factor 3B subunit 1	SF3B1	1	0.00241575	74.464	TPDPK(1)MNAR	2	1.034	5	35167000	47666000	1.278
O75533	785	K	Splicing factor 3B subunit 1	SF3B1	1	0.0355862	49.448	EFQSPDEEMK(1)K	2	-1.1169	1	2945500	2450700	0.959
O75533	141	K	Splicing factor 3B subunit 1	SF3B1	1	0.0297409	67.838	LDPFADGGK(1)TPDPK	2	1.8262	1	0	11364000
O75533	858	K	Splicing factor 3B subunit 1	SF3B1	1	5.56317e-14	179.93	IVDDLK(1)DEAEQYR	2	0.50451	1	18320000	18799000	1.097
O75533	175	K	Splicing factor 3B subunit 1	SF3B1	1	0.0352341	50.04	QQLAEK(1)AK	2	-0.51877	1	14507000	17909000	1.261
O75533	195	K	Splicing factor 3B subunit 1	SF3B1	1	3.24805e-05	104.9	VVNGAAASQPPSK(1)R	2	-0.33276	1	1998300	2087600	1.074
O75534	696	K	Cold shock domain-containing protein E1	CSDE1	1	1.92767e-05	102.64	DQFGFINYEVGDSK(1)K	2	0.83073	1	8668200	8190800	0.899
O75643	2080	K	U5 small nuclear ribonucleoprotein 200 kDa helicase	SNRNP200	1	0.000493009	112.01	SNSLISIK(1)R	2	0.64828	2	18988000	21200000	0.959
O75643	177	K	U5 small nuclear ribonucleoprotein 200 kDa helicase	SNRNP200	1	0.000430096	76.679	YHVLVNLGK(1)K	3	0.52826	2	29358000	26777000	0.961
O75643	1421	K	U5 small nuclear ribonucleoprotein 200 kDa helicase	SNRNP200	1	0.00530476	58.817	LLGK(1)GNIIISTPEK	2	0.55445	1	2372100	3340400	1.135
O75643	284	K	U5 small nuclear ribonucleoprotein 200 kDa helicase	SNRNP200	1	0.000109334	113.38	FYDDAIVSQK(1)K	2	1.0409	1	39035000	36230000	1.079
O75643	695	K	U5 small nuclear ribonucleoprotein 200 kDa helicase	SNRNP200	1	3.39782e-06	106.42	PVPLEQTYVGITEK(1)K	2	0.35335	3	18608000	19536000	1.138
O75643	838	K	U5 small nuclear ribonucleoprotein 200 kDa helicase	SNRNP200	1	0.0580532	47.062	GTQVYSPEK(1)GR	2	0.28121	1	3009400	2793500	1.015
O75643	557	K	U5 small nuclear ribonucleoprotein 200 kDa helicase	SNRNP200	1	2.36285e-07	139.48	SLVQEMVGSFGK(1)R	3	-0.04561	3	12315000	11329000	0.999
O75663	207	K	TIP41-like protein	TIPRL	1	0.0332976	42.475	LYHEADK(1)TYMLR	3	2.306	1	0	6397900
O75674	148	K	TOM1-like protein 1	TOM1L1	1	0.0214376	64.841	EVYLDLVK(1)K	2	0.64291	1	0	0
O75683	124	K	Surfeit locus protein 6	SURF6	1	0.000533511	103.26	LHEK(1)IQEAR	2	1.2861	2	4541400	4474600	1.098
O75683	294	K	Surfeit locus protein 6	SURF6	1	0.00528301	95.531	LLQEALK(1)R	2	2.2246	1	5195700	4890500	0.982
O75683	7	K	Surfeit locus protein 6	SURF6	1	0.00423842	55.097	ASLLAK(1)DAYLQSLAK	2	0.71406	1	2670900	1892500
O75694	824	K	Nuclear pore complex protein Nup155	NUP155	1	0.000319673	104.22	ITTFK(1)DLVIR	2	-0.25175	1	5450300	3959000	0.916
O75694	689	K	Nuclear pore complex protein Nup155	NUP155	1	0.0269502	64.776	IFK(1)SGNR	2	-0.44459	1	29648000	23920000	0.82
O75718	182	K	Cartilage-associated protein	CRTAP	1	0.0552823	44.863	HPDDEMMK(1)R	2	0.12697	1	1819900	1605900	0.915
O75821	272	K	Eukaryotic translation initiation factor 3 subunit G	EIF3G	1	0.0232729	67.981	IYLAK(1)DK	2	-0.016999	2	14160000	17671000	1.288
O75821	193	K	Eukaryotic translation initiation factor 3 subunit G	EIF3G	1	3.34223e-15	180.27	ELAEQLGLSTGEK(1)EK	2	-2.5808	1	0	16781000
O75822	166	K	Eukaryotic translation initiation factor 3 subunit J	EIF3J	1	0.0124561	68.625	DK(1)ITQYEK	2	1.4162	1	12158000	20904000	1.445
O75822	210	K	Eukaryotic translation initiation factor 3 subunit J	EIF3J	1	0.00664334	85.739	ITNSLTVLCSEK(1)QK	2	-0.14737	1	0	8215700
O75822	117	K	Eukaryotic translation initiation factor 3 subunit J	EIF3J	1	3.90105e-05	111.79	VLTPEEQLADK(1)LR	2	0.97459	1	39774000	51281000	1.355
O75832	221	K	26S proteasome non-ATPase regulatory subunit 10	PSMD10	1	0.00368081	73.248	GGLGLILK(1)R	2	0.12286	2	13671000	20503000	1.578
O75832	30	K	26S proteasome non-ATPase regulatory subunit 10	PSMD10	1	0.00104481	76.073	ESILADK(1)SLATR	2	0.8051	1	16798000	24980000	1.716
O75844	259	K	CAAX prenyl protease 1 homolog	ZMPSTE24	1	0.00186054	80.231	VYVVEGSK(1)R	2	0.092838	2	21569000	25359000	1.052
O75844	66	K	CAAX prenyl protease 1 homolog	ZMPSTE24	1	4.04352e-09	104.18	TTTHVPPELGQIMDSETFEK(1)SR	3	0.78355	1	10288000	11711000	1.181
O75844	423	K	CAAX prenyl protease 1 homolog	ZMPSTE24	1	0.0261519	65.879	FEFQADAFAK(1)K	2	3.0304	1	0	6843300
O75874	243	K	Isocitrate dehydrogenase [NADP] cytoplasmic	IDH1	1	0.000889107	68.262	SQFEAQK(1)IWYEHR	3	0.50514	2	3842800	4791400	1.238
O75874	233	K	Isocitrate dehydrogenase [NADP] cytoplasmic	IDH1	1	0.000173807	98.902	DIFQEIYDK(1)QYK	2	-0.027328	2	16183000	17762000	1.332
O75874	65	K	Isocitrate dehydrogenase [NADP] cytoplasmic	IDH1	1	0.0202903	62.546	DAAEAIK(1)K	2	0.60944	2	10104000	12730000	1.255
O75880	210	K	Protein SCO1 homolog, mitochondrial	SCO1	1	3.79182e-06	133.89	DTK(1)EAIANYVK	2	-0.58921	2	20545000	17270000	0.844
O75915	158	K	PRA1 family protein 3	ARL6IP5	1	0.00522626	89.752	MEGIGLK(1)R	2	0.73862	3	67310000	42650000	0.693
O75937	127	K	DnaJ homolog subfamily C member 8	DNAJC8	1	4.65498e-07	102.08	ALDVIQAGK(1)EYVEHTVK	3	-0.53662	1	11976000	7433200	1.406
O75937	116	K	DnaJ homolog subfamily C member 8	DNAJC8	1	0.000197626	130.75	LLLDQEQK(1)K	2	-0.35832	7	34239000	45512000	1.588
O75937	176	K	DnaJ homolog subfamily C member 8	DNAJC8	1	0.00110354	91.867	LFAELEIK(1)R	2	0.14044	2	5497600	9516900	1.509
O75940	142	K	Survival of motor neuron-related-splicing factor 30	SMNDC1	0.979748	0.0528227	63.908	EDSGNK(0.02)PMSK(0.98)K	2	-0.49242	1	1840000	2557000	1.418
O75947	149	K	ATP synthase subunit d, mitochondrial	ATP5H	1	0.00331451	79.235	K(1)YPYWPHQPIENL	2	0.54912	1	0	0
O75947	85	K	ATP synthase subunit d, mitochondrial	ATP5H	1	2.12454e-28	188.19	VPVPEDK(1)YTAQVDAEEKEDVK	3	-0.2869	2	69789000	74375000	1.143
O75947	72	K	ATP synthase subunit d, mitochondrial	ATP5H	1	0.00161603	81.017	AGLVDDFEK(1)K	2	0.37822	6	114020000	103410000	0.915
O75964	66	K	ATP synthase subunit g, mitochondrial	ATP5L	1	5.21838e-10	141.55	IVNSAQTGSFK(1)QLTVK	2	0.088154	2	10673000	10557000	1.012
O75964	54	K	ATP synthase subunit g, mitochondrial	ATP5L	1	0.0290292	66.993	AIQSLK(1)K	2	2.0677	5	140020000	123000000	0.98
O75976	1201	K	Carboxypeptidase D	CPD	1	0.000425297	101.66	LPSLWADNK(1)R	2	-0.4803	1	22800000	6393100	0.402
O76003	110	K	Glutaredoxin-3	GLRX3	1	9.97576e-07	136.93	LDGAHAPELTK(1)K	2	0.84632	2	5970900	11142000	1.963
O76021	240	K	Ribosomal L1 domain-containing protein 1	RSL1D1	1	0.0356857	47.706	GLSEK(1)LPEK	2	0.49912	1	9209700	10633000	0.993
O76021	33	K	Ribosomal L1 domain-containing protein 1	RSL1D1	1	0.0218206	65.719	QLDK(1)EQVR	2	-1.479	3	24537000	23713000	1.014
O76021	373	K	Ribosomal L1 domain-containing protein 1	RSL1D1	1	2.46839e-13	152.9	ATNESEDEIPQLVPIGK(1)K	2	0.9328	2	8417000	10692000	1.324
O76021	120	K	Ribosomal L1 domain-containing protein 1	RSL1D1	1	0.00579552	85.813	LLNK(1)HGIK	2	-0.34478	1	6808200	6627200	1.045
O76021	249	K	Ribosomal L1 domain-containing protein 1	RSL1D1	1	0.00365482	72.096	WESVK(1)LLFVK	2	-0.40668	2	18405000	20052000	1.043
O76021	448	K	Ribosomal L1 domain-containing protein 1	RSL1D1	1	0.0289761	67.032	SPSLGK(1)K	2	-0.3392	1	14015000	17351000	1.15
O76021	136	K	Ribosomal L1 domain-containing protein 1	RSL1D1	1	0.00635231	62.287	TVSQIISLQTLK(1)K	2	-1.0107	1	4531000	3192100	0.926
O76021	76	K	Ribosomal L1 domain-containing protein 1	RSL1D1	1	0.0119236	83.753	IPSK(1)ELR	2	1.942	1	9866000	11450000	1.044
O76021	380	K	Ribosomal L1 domain-containing protein 1	RSL1D1	1	1.61639e-15	205.49	TPANEK(1)VEIQK	2	0.70078	4	34979000	40409000	1.187
O76031	286	K	ATP-dependent Clp protease ATP-binding subunit clpX-like, mitochondrial	CLPX	1	1.2359e-08	130.92	LEK(1)SNILLLGPTGSGK	2	3.0514	1	3038500	4145100	1.43
O76094	112	K	Signal recognition particle subunit SRP72	SRP72	1	8.92247e-08	146.71	LK(1)ELYGQVLYR	2	-0.36706	2	4358900	6551400	1.331
O76094	42	K	Signal recognition particle subunit SRP72	SRP72	1	0.00105463	58.885	ILQINK(1)DDVTALHCK	3	-0.74432	1	7310700	9038100	1.284
O76094	283	K	Signal recognition particle subunit SRP72	SRP72	1	0.000368921	119.68	DQNVFDSK(1)K	2	0.469	3	6918400	21144000	1.344
O76094	110	K	Signal recognition particle subunit SRP72	SRP72	1	3.9834e-10	182.07	TIESANQQTDK(1)LK	2	0.70625	1	0	5518300
O94804	605	K	Serine/threonine-protein kinase 10	STK10	1	0.000499496	111.61	FEQEINAK(1)K	2	0.40605	2	7725200	9240900	1.18
O94808	58	K	Glutamine--fructose-6-phosphate aminotransferase [isomerizing] 2	GFPT2	1	0.00694764	106.42	HIQLVK(1)K	2	-0.57718	1	4712500	10538000	2.176
O94826	170	K	Mitochondrial import receptor subunit TOM70	TOMM70A	1	0.000415815	97.734	WK(1)EVAQDCTK	2	0.60142	1	9334500	13294000	1.346
O94826	319	K	Mitochondrial import receptor subunit TOM70	TOMM70A	1	0.000143585	85.909	IISECSK(1)EIDAEGK	2	-2.1862	1	0	0
O94826	501	K	Mitochondrial import receptor subunit TOM70	TOMM70A	1	4.99104e-06	77.51	ADEMYDK(1)CIDLEPDNATTYVHK	3	-1.1143	2	23935000	26491000	1.145
O94826	563	K	Mitochondrial import receptor subunit TOM70	TOMM70A	1	0.00271528	67.997	GNMEK(1)AIDMFNK	2	-0.15374	1	2625600	3939200	1.594
O94826	600	K	Mitochondrial import receptor subunit TOM70	TOMM70A	0.999829	0.0348111	57.032	K(1)YGLKPPTL	2	0.73347	1	15737000	17852000	1.333
O94826	372	K	Mitochondrial import receptor subunit TOM70	TOMM70A	1	0.0340877	63.287	ANALIK(1)R	2	0.5016	1	9665800	11929000	1.382
O94826	78	K	Mitochondrial import receptor subunit TOM70	TOMM70A	1	0.0122251	71.501	GDASGLK(1)R	2	-0.089453	2	21158000	21109000	1.098
O94842	207	K	TOX high mobility group box family member 4	TOX4	1	0.0108412	62.463	TVVVEAGK(1)K	2	-1.9851	2	5489200	3872300	0.84
O94851	117	K	Protein-methionine sulfoxide oxidase MICAL2	MICAL2	1	0.0444761	55.676	VVVVEK(1)R	2	-0.91201	1	10206000	10411000	1.115
O94874	43	K	E3 UFM1-protein ligase 1	UFL1	1	0.00370842	50.827	LIAQK(1)QLEVVHTLDGK	3	-3.1545	1	3759100	2935800	0.963
O94874	105	K	E3 UFM1-protein ligase 1	UFL1	1	5.14265e-09	105.06	SEK(1)HVQLVLGQLIDENYLDR	3	0.86387	2	4770400	4765700	1.142
O94905	190	K	Erlin-2	ERLIN2	1	2.40489e-06	136.96	NYELMESEK(1)TK	2	0.66021	3	23030000	18657000	0.799
O94905	241	K	Erlin-2	ERLIN2	1	6.16739e-07	107.99	K(1)ISEIEDAAFLAR	2	1.1041	1	0	0
O94905	232	K	Erlin-2	ERLIN2	1	4.67045e-05	78.078	VAQVAEITYGQK(1)VMEK	2	-2.0468	2	6148100	5162100	0.942
O94906	146	K	Pre-mRNA-processing factor 6	PRPF6	1	2.27186e-05	109.83	IQQQFSDLK(1)R	2	-0.079851	1	0	0
O94906	585	K	Pre-mRNA-processing factor 6	PRPF6	1	0.0337642	48.568	AAYFEK(1)NHGTR	2	-0.47881	1	5653600	4485900	1.034
O94906	110	K	Pre-mRNA-processing factor 6	PRPF6	1	0.00221842	72.797	DDEEADAIYAALDK(1)R	2	2.562	1	1653700	1490700	0.835
O94906	768	K	Pre-mRNA-processing factor 6	PRPF6	1	0.0264042	65.252	AILEK(1)SR	2	0.0016434	1	11914000	12277000	1.156
O94925	197	K	Glutaminase kidney isoform, mitochondrial	GLS	1	2.12294e-07	111.63	LTLQTTSDGVMLDK(1)DLFK	3	1.3024	2	12204000	11607000	1.13
O94925	201	K	Glutaminase kidney isoform, mitochondrial	GLS	0.9967	0.000450181	64.705	LTLQTTSDGVMLDK(0.003)DLFK(0.997)K	3	1.6651	1	13959000	13069000	1.068
O94925	164	K	Glutaminase kidney isoform, mitochondrial	GLS	1	0.000234993	102.05	FITALK(1)STGLR	2	0.69748	2	15301000	15357000	1.052
O94925	311	K	Glutaminase kidney isoform, mitochondrial	GLS	1	0.00119791	83.862	YVGK(1)EPSGLR	2	0.51899	1	19828000	12010000	0.933
O94925	396	K	Glutaminase kidney isoform, mitochondrial	GLS	1	0.00307468	72.29	NFAIGYYLK(1)EK	2	-0.57554	2	50691000	65630000	1.126
O94925	176	K	Glutaminase kidney isoform, mitochondrial	GLS	1	0.00170475	77.662	LK(1)ECMDMLR	2	-0.86339	2	22138000	24629000	0.944
O94973	631	K	AP-2 complex subunit alpha-2	AP2A2	1	6.26647e-07	107.65	GPSTVTDLEDTK(1)R	2	0.29057	1	0	0
O94979	1156	K	Protein transport protein Sec31A	SEC31A	1	0.000422012	111.46	LEFLYDK(1)LR	2	1.3569	2	11088000	12184000	1.144
O94979	111	K	Protein transport protein Sec31A	SEC31A	1	2.86199e-11	153.23	IIAGDK(1)EVVIAQNDK	2	0.8717	3	13916000	13463000	1.067
O95081	138	K	Arf-GAP domain and FG repeat-containing protein 2	AGFG2	1	0.00101555	90.263	EFLQEK(1)YEK	2	1.2878	2	10616000	25621000	1.848
O95139	100	K	NADH dehydrogenase [ubiquinone] 1 beta subcomplex subunit 6	NDUFB6	1	1.64077e-14	172.09	YHVSEKPYGIVEK(1)K	2	0.57862	1	7421800	8705600	1.345
O95140	36	K	Mitofusin-2	MFN2	1	0.00750298	103.75	HFVTAK(1)K	2	0.1859	3	11854000	8589500	0.718
O95163	484	K	Elongator complex protein 1	IKBKAP	1	0.0446748	55.531	TPHLEK(1)R	2	2.0328	1	1511600	3144200	2.08
O95166	13	K	Gamma-aminobutyric acid receptor-associated protein	GABARAP	1	0.0220792	93.374	EEHPFEK(1)R	2	-2.2725	1	0	4237900
O95182	92	K	NADH dehydrogenase [ubiquinone] 1 alpha subcomplex subunit 7	NDUFA7	1	5.61079e-18	201.09	PAESSAVAATEK(1)K	2	-0.47795	2	21488000	22354000	1.088
O95182	33	K	NADH dehydrogenase [ubiquinone] 1 alpha subcomplex subunit 7	NDUFA7	1	0.044168	55.902	YQEISK(1)R	2	0.087022	1	9629500	10097000	1.034
O95182	102	K	NADH dehydrogenase [ubiquinone] 1 alpha subcomplex subunit 7	NDUFA7	1	0.0118698	61.161	AVTPAPPIK(1)R	2	-0.79147	1	14244000	17821000	1.316
O95197	1022	K	Reticulon-3	RTN3	1	0.0226284	51.445	IQAK(1)LPGIAK	2	0.072077	1	21278000	34683000	1.553
O95197	998	K	Reticulon-3	RTN3	1	1.50085e-13	169.04	YK(1)TQIDHYVGIAR	2	-0.46225	2	16496000	27710000	1.476
O95197	1028	K	Reticulon-3	RTN3	1	0.0348695	62.714	LPGIAK(1)K	2	0.23771	4	44097000	63768000	1.354
O95202	162	K	LETM1 and EF-hand domain-containing protein 1, mitochondrial	LETM1	1	0.000688254	69.03	VLDELK(1)HYYHGFR	4	0.24438	2	29524000	23904000	0.838
O95202	679	K	LETM1 and EF-hand domain-containing protein 1, mitochondrial	LETM1	1	1.54221e-15	165.78	LTSLAAALDENK(1)DGK	2	3.8212	3	10664000	19310000	1.073
O95202	176	K	LETM1 and EF-hand domain-containing protein 1, mitochondrial	LETM1	1	0.0012677	78.342	LLWIDTK(1)IAAR	2	3.1244	1	1660800	1943300	1.067
O95202	150	K	LETM1 and EF-hand domain-containing protein 1, mitochondrial	LETM1	1	2.57021e-05	86.8	LEEGGPVYSPPAEVVVK(1)K	2	1.0172	4	9830400	11896000	1.096
O95202	587	K	LETM1 and EF-hand domain-containing protein 1, mitochondrial	LETM1	1	8.44381e-28	225.29	EDVQDYSEDLQEIK(1)K	3	-0.22435	3	26983000	26507000	1.303
O95218	18	K	Zinc finger Ran-binding domain-containing protein 2	ZRANB2	1	0.00941216	58.595	VSDGDWICPDK(1)K	2	0.1686	2	10549000	8269000	0.761
O95292	118	K	Vesicle-associated membrane protein-associated protein B/C	VAPB	1	0.048137	83.633	EAKPEDLMDSK(1)LR	2	-0.95059	1	0	5599500
O95292	3	K	Vesicle-associated membrane protein-associated protein B/C	VAPB	1	1.54238e-10	144.46	AK(1)VEQVLSLEPQHELK	2	0.1779	3	11863000	11001000	0.999
O95292	167	K	Vesicle-associated membrane protein-associated protein B/C	VAPB	1	3.43271e-05	113.99	SLSSSLDDTEVK(1)K	2	0.26758	1	15239000	12146000	0.869
O95298	114	K	NADH dehydrogenase [ubiquinone] 1 subunit C2	NDUFC2	1	1.25437e-09	148.96	TYGEIFEK(1)FHPIR	3	1.6929	2	11816000	51668000	0.966
O95298	105	K	NADH dehydrogenase [ubiquinone] 1 subunit C2	NDUFC2	1	0.000333017	95.273	LHPEDFPEEDK(1)K	2	1.0575	4	18503000	17993000	0.871
O95299	243	K	NADH dehydrogenase [ubiquinone] 1 alpha subcomplex subunit 10, mitochondrial	NDUFA10	1	0.0117443	61.344	K(1)TFLPEMSEK	2	1.0019	2	4572200	4452400	0.842
O95299	338	K	NADH dehydrogenase [ubiquinone] 1 alpha subcomplex subunit 10, mitochondrial	NDUFA10	1	9.05864e-05	103.76	K(1)YSPGYNTEVGDK	2	0.27037	2	8399700	6426500	0.976
O95299	80	K	NADH dehydrogenase [ubiquinone] 1 alpha subcomplex subunit 10, mitochondrial	NDUFA10	1	0.0329604	48.423	EIAEK(1)LGFK	2	-2.4376	1	4024800	5795100	1.443
O95302	218	K	Peptidyl-prolyl cis-trans isomerase FKBP9	FKBP9	1	0.0179742	52.837	GLLGMCVGEK(1)R	2	-2.3452	1	10117000	8110900	1.223
O95302	441	K	Peptidyl-prolyl cis-trans isomerase FKBP9	FKBP9	1	0.00386973	107.29	EMCVGEK(1)R	2	-0.16894	2	18067000	25995000	1.25
O95336	254	K	6-phosphogluconolactonase	PGLS	1	0.0366995	64.121	LLTVPFEK(1)HSTL	2	1.0629	1	0	8323400
O95347	481	K	Structural maintenance of chromosomes protein 2	SMC2	0.999996	3.36122e-05	87.519	LNYEENKEESLLEK(1)R	3	0.73886	1	8305500	14536000	1.943
O95347	1025	K	Structural maintenance of chromosomes protein 2	SMC2	1	0.000326199	95.417	ILTTIEDLDQK(1)K	2	-1.3516	1	3054100	5213800	2.346
O95373	1013	K	Importin-7	IPO7	1	0.0124802	56.434	MIEK(1)HGGYK	3	-0.48892	2	3013300	3755200	1.313
O95373	182	K	Importin-7	IPO7	1	0.000321036	68.625	SPLVAAMQHFLPVLK(1)DR	3	0.71957	1	8862400	7958100	1.165
O95373	1009	K	Importin-7	IPO7	1	0.0423317	46.796	AAHESK(1)MIEK	2	1.6146	1	959090	1327400	0.972
O95373	314	K	Importin-7	IPO7	1	0.0428595	45.081	EK(1)QYMAPR	2	0.68557	1	0	4691400
O95379	27	K	Tumor necrosis factor alpha-induced protein 8	TNFAIP8	1	0.0429102	47.603	NLAVQAQK(1)K	2	-1.0636	1	2553300	3603800	1.333
O95453	443	K	Poly(A)-specific ribonuclease PARN	PARN	1	5.34122e-06	87.676	VMDIPYLNLEGPDLQPK(1)R	3	-0.56654	1	8177500	6445100	0.848
O95453	234	K	Poly(A)-specific ribonuclease PARN	PARN	1	4.3409e-13	168.02	GIHVETLETEK(1)K	2	2.1952	2	13746000	12674000	0.812
O95453	326	K	Poly(A)-specific ribonuclease PARN	PARN	1	0.000329908	81.578	LLDTK(1)LMASTQPFK	2	0.82252	2	5529200	4703100	0.832
O95470	369	K	Sphingosine-1-phosphate lyase 1	SGPL1	1	5.8181e-07	118.9	GSSLVLYSDK(1)K	2	-0.16257	1	0	0
O95487	849	K	Protein transport protein Sec24B	SEC24B	1	0.000220443	89.624	VVQHLGPATDFYK(1)K	2	-0.28952	1	2532300	5271100	1.583
O95563	19	K	Mitochondrial pyruvate carrier 2	MPC2	1	0.00104733	76.01	LLDK(1)VELMLPEK	2	0.81415	1	1813800	2907000	1.965
O95571	66	K	Persulfide dioxygenase ETHE1, mitochondrial	ETHE1	1	0.000739141	88.803	DAQLIK(1)ELGLR	2	3.0643	1	5442100	3326100	0.589
O95573	521	K	Long-chain-fatty-acid--CoA ligase 3	ACSL3	1	2.94302e-06	94.487	NWEEGGYFNTDK(1)PHPR	3	-0.4727	1	13790000	24157000	1.998
O95573	222	K	Long-chain-fatty-acid--CoA ligase 3	ACSL3	1	0.000316524	104.43	LK(1)DIVSLVPR	2	-0.18896	2	4868300	9313000	2.262
O95670	16	K	V-type proton ATPase subunit G 2	ATP6V1G2	1	1.76617e-05	107.03	ASQSQGIQQLLQAEK(1)R	2	0.19604	1	0	2346900
O95671	563	K	N-acetylserotonin O-methyltransferase-like protein	ASMTL	1	8.1303e-11	103.25	VAESCKPGAGLLLVETLLDEEK(1)R	3	1.3639	1	0	15605000
O95674	435	K	Phosphatidate cytidylyltransferase 2	CDS2	1	1.24022e-17	167.61	SHLIDK(1)GMLTSTTEDE	2	-1.1213	2	40136000	38830000	1.042
O95757	573	K	Heat shock 70 kDa protein 4L	HSPA4L	1	0.0199891	73.616	LNQTLK(1)K	2	0.99701	1	3965400	5183500	1.167
O95758	503	K	Polypyrimidine tract-binding protein 3	PTBP3	1	0.000252082	85.909	NLFIEAGCSVK(1)AFK	2	0.819	1	4438600	4146800	1.475
O95758	395	K	Polypyrimidine tract-binding protein 3	PTBP3	1	1.78916e-10	102.16	K(1)ENALVQMADANQAQLAMNHLSGQR	3	-0.61007	1	8471000	7114900	0.941
O95758	506	K	Polypyrimidine tract-binding protein 3	PTBP3	1	0.00852161	94.163	AFK(1)FFQK	2	-0.91031	2	20103000	18312000	0.947
O95758	423	K	Polypyrimidine tract-binding protein 3	PTBP3	1	0.0293165	62.714	LYGK(1)VLR	2	-0.39523	1	5602200	6478600	1.212
O95793	337	K	Double-stranded RNA-binding protein Staufen homolog 1	STAU1	1	0.0033628	67.326	VGNHTAEGTGTNK(1)K	2	0.38581	3	1295800	2216200	1.95
O95793	298	K	Double-stranded RNA-binding protein Staufen homolog 1	STAU1	1	0.000662275	101.54	LAQIQQAK(1)K	2	0.08295	4	43758000	73229000	1.539
O95793	299	K	Double-stranded RNA-binding protein Staufen homolog 1	STAU1	0.95054	0.00209919	56.527	K(0.951)EK(0.049)EPEYTLLTER	3	0.77543	1	4620100	5501800	2.296
O95816	200	K	BAG family molecular chaperone regulator 2	BAG2	1	0.0071737	53.3	GAGSK(1)TLQQNAESR	2	-0.20459	1	2067900	1362500	0.812
O95817	445	K	BAG family molecular chaperone regulator 3	BAG3	1	1.66257e-21	196.95	VQGLEQAVDNFEGK(1)K	2	-0.41313	2	5272600	6435200	1.341
O95817	450	K	BAG family molecular chaperone regulator 3	BAG3	1	0.0116443	59.227	K(1)YLMIEEYLTK	2	1.8938	1	2552000	3557900	1.291
O95831	255	K	Apoptosis-inducing factor 1, mitochondrial	AIFM1	1	3.38711e-06	87.963	LNDGSQITYEK(1)CLIATGGTPR	3	-1.4594	1	30178000	22010000	0.713
O95831	355	K	Apoptosis-inducing factor 1, mitochondrial	AIFM1	1	0.00628531	50.305	ILPEYLSNWTMEK(1)VR	3	-0.061873	1	7014400	5987100	0.701
O95994	88	K	Anterior gradient protein 2 homolog	AGR2	1	1.61424e-30	201.58	TSNKPLMIIHHLDECPHSQALK(1)K	3	-0.31641	4	47039000	117640000	2.634
O95994	34	K	Anterior gradient protein 2 homolog	AGR2	0.998261	0.00585338	56.548	K(0.002)DTK(0.998)DSRPK	2	0.43169	1	590230	1309000	2.232
O95994	165	K	Anterior gradient protein 2 homolog	AGR2	1	1.72719e-13	156.29	LYAYEPADTALLLDNMK(1)K	2	0.43867	6	68994000	169490000	2.243
O95994	89	K	Anterior gradient protein 2 homolog	AGR2	1	0.0146023	82.671	K(1)VFAENK	2	-1.3873	3	19562000	43666000	2.191
O95994	30	K	Anterior gradient protein 2 homolog	AGR2	0.996595	0.00419199	94.692	DTTVK(0.003)PGAK(0.997)K	2	-0.133	1	6367400	14918000	2.343
O96005	224	K	Cleft lip and palate transmembrane protein 1	CLPTM1	1	1.94865e-13	162.76	NLLTGETEADPEMIK(1)R	2	0.90357	3	17508000	24069000	1.335
O96005	534	K	Cleft lip and palate transmembrane protein 1	CLPTM1	1	0.000391299	79.659	LK(1)SVAHLPWR	3	-0.70174	1	17483000	28647000	1.847
O96005	460	K	Cleft lip and palate transmembrane protein 1	CLPTM1	1	0.000243809	101.35	DK(1)STYIESSTK	2	0.6227	4	46959000	82603000	1.63
O96008	330	K	Mitochondrial import receptor subunit TOM40 homolog	TOMM40	1	2.39202e-06	108.14	GSVDSNWIVGATLEK(1)K	2	0.30443	4	34558000	32973000	1.049
P00167	33	K	Cytochrome b5	CYB5A	1	4.54732e-05	82.349	STWLILHHK(1)VYDLTK	3	-1.3038	2	8623200	10105000	1.255
P00167	39	K	Cytochrome b5	CYB5A	1	5.95897e-06	85.087	VYDLTK(1)FLEEHPGGEEVLR	3	1.6338	2	11031000	13117000	0.708
P00167	77	K	Cytochrome b5	CYB5A	1	8.34108e-06	82.877	EMSK(1)TFIIGELHPDDRPK	3	0.80227	2	6287400	7209000	1.198
P00338	328	K	L-lactate dehydrogenase A chain	LDHA	1	0.000127255	92.856	SADTLWGIQK(1)ELQF	2	0.3958	1	18402000	23876000	1.25
P00338	228	K	L-lactate dehydrogenase A chain	LDHA	1	0.00399295	129	DKEQWK(1)EVHK	2	-0.26145	2	2664200	7860900	1.968
P00338	59	K	L-lactate dehydrogenase A chain	LDHA	1	1.28484e-09	137.79	LK(1)GEMMDLQHGSLFLR	3	-0.57388	4	154290000	203180000	1.322
P00338	243	K	L-lactate dehydrogenase A chain	LDHA	1	0.000578271	80.96	QVVESAYEVIK(1)LK	2	0.92128	1	2702100	4662100	1.866
P00338	81	K	L-lactate dehydrogenase A chain	LDHA	1	1.31678e-07	129.92	IVSGK(1)DYNVTANSK	2	0.72086	2	26551000	38128000	1.44
P00338	278	K	L-lactate dehydrogenase A chain	LDHA	1	1.21844e-05	95.183	VHPVSTMIK(1)GLYGIK	3	-0.72295	1	31862000	81336000	1.638
P00338	232	K	L-lactate dehydrogenase A chain	LDHA	1	0.000384539	70.134	EVHK(1)QVVESAYEVIK	3	-0.74904	1	59858000	58380000	1.3
P00338	318	K	L-lactate dehydrogenase A chain	LDHA	1	0.000639403	92.792	K(1)SADTLWGIQK	2	0.56927	3	21370000	27139000	1.519
P00338	224	K	L-lactate dehydrogenase A chain	LDHA	0.999532	7.53046e-23	187	TLHPDLGTDKDK(1)EQWK	2	-0.26354	7	141130000	223730000	1.67
P00338	222	K	L-lactate dehydrogenase A chain	LDHA	1	2.70459e-17	180.64	TLHPDLGTDK(1)DK	3	0.73452	11	257500000	382440000	1.584
P00338	5	K	L-lactate dehydrogenase A chain	LDHA	1	4.91201e-22	222.79	ATLK(1)DQLIYNLLK	2	1.7308	5	49678000	65092000	1.332
P00352	398	K	Retinal dehydrogenase 1	ALDH1A1	1	1.87559e-05	92.65	IAK(1)EEIFGPVQQIMK	3	0.26453	7	102620000	79952000	0.924
P00352	412	K	Retinal dehydrogenase 1	ALDH1A1	1	0.000354705	105.2	FK(1)SLDDVIK	2	-0.75198	8	211330000	123180000	0.904
P00352	139	K	Retinal dehydrogenase 1	ALDH1A1	1	2.11701e-09	152.64	YCAGWADK(1)IQGR	2	-0.20365	9	662340000	560530000	0.834
P00352	91	K	Retinal dehydrogenase 1	ALDH1A1	1	1.08132e-07	143	LLYK(1)LADLIER	2	0.9778	5	113060000	93605000	0.856
P00352	17	K	Retinal dehydrogenase 1	ALDH1A1	1	3.23196e-26	195.46	SSSGTPDLPVLLTDLK(1)IQYTK	2	-0.67233	3	41255000	32574000	0.826
P00352	435	K	Retinal dehydrogenase 1	ALDH1A1	1	2.05858e-14	151.63	ANNTFYGLSAGVFTK(1)DIDK	2	0.98875	3	39437000	33716000	0.905
P00352	22	K	Retinal dehydrogenase 1	ALDH1A1	1	9.7675e-27	188.09	IQYTK(1)IFINNEWHDSVSGK	2	0.47427	3	300720000	243260000	0.825
P00352	353	K	Retinal dehydrogenase 1	ALDH1A1	1	2.31807e-07	120.7	EQYDK(1)ILDLIESGK	2	-0.18943	11	199040000	182010000	0.944
P00352	419	K	Retinal dehydrogenase 1	ALDH1A1	1	0.00307832	114.5	SLDDVIK(1)R	2	-0.40357	28	2717300000	2303900000	0.83
P00352	255	K	Retinal dehydrogenase 1	ALDH1A1	1	0.00642473	81.296	LIK(1)EAAGK	2	1.1192	4	276100000	241650000	0.981
P00352	329	K	Retinal dehydrogenase 1	ALDH1A1	1	5.89321e-27	188.84	K(1)YILGNPLTPGVTQGPQIDKEQYDK	3	-0.16048	6	157470000	167180000	1.073
P00352	264	K	Retinal dehydrogenase 1	ALDH1A1	1	0.0597783	65.719	EAAGK(1)SNLK(1)R	2	-0.4413	1	2405300	3326500	1.105
P00352	410	K	Retinal dehydrogenase 1	ALDH1A1	1	0.0236438	53.448	EEIFGPVQQIMK(1)FK	2	0.22174	1	2261900	4952600	0.886
P00352	128	K	Retinal dehydrogenase 1	ALDH1A1	1	1.14939e-24	192.24	LYSNAYLNDLAGCIK(1)TLR	3	-0.12753	4	196070000	145530000	0.823
P00352	252	K	Retinal dehydrogenase 1	ALDH1A1	1	1.5561e-07	127.71	VAFTGSTEVGK(1)LIK	2	0.57148	2	123580000	106670000	0.851
P00352	57	K	Retinal dehydrogenase 1	ALDH1A1	1	2.79796e-28	180.9	KFPVFNPATEEELCQVEEGDK(1)EDVDK	3	-0.40531	7	320560000	308310000	1.135
P00352	36	K	Retinal dehydrogenase 1	ALDH1A1	1	7.77109e-68	311	IFINNEWHDSVSGK(1)K	2	0.14144	33	2331900000	1871200000	0.834
P00352	348	K	Retinal dehydrogenase 1	ALDH1A1	1	8.37738e-31	195.09	YILGNPLTPGVTQGPQIDK(1)EQYDK	2	0.59038	7	196310000	188930000	0.999
P00352	362	K	Retinal dehydrogenase 1	ALDH1A1	1	2.40237e-05	137.98	ILDLIESGK(1)K	2	-3.044	37	3841000000	3287800000	0.844
P00352	37	K	Retinal dehydrogenase 1	ALDH1A1	1	1.09653e-27	165	K(1)FPVFNPATEEELCQVEEGDKEDVDK	3	0.35612	2	97569000	97924000	1.065
P00352	260	K	Retinal dehydrogenase 1	ALDH1A1	1	0.00149226	81.547	EAAGK(1)SNLK(1)R	2	-0.4413	3	62941000	56344000	0.872
P00352	490	K	Retinal dehydrogenase 1	ALDH1A1	1	1.49062e-11	132.79	ELGEYGFHEYTEVK(1)TVTVK	3	-0.22971	4	140410000	105140000	0.866
P00352	62	K	Retinal dehydrogenase 1	ALDH1A1	0.999997	8.23772e-31	181.92	KFPVFNPATEEELCQVEEGDKEDVDK(1)AVK	3	0.22812	17	1540600000	1416200000	1.163
P00367	84	K	Glutamate dehydrogenase 1, mitochondrial	GLUD1	1	1.97616e-05	109.07	GASIVEDK(1)LVEDLR	2	-3.1129	3	27475000	27883000	0.989
P00367	503	K	Glutamate dehydrogenase 1, mitochondrial	GLUD1	1	1.12143e-27	192.18	ISGASEK(1)DIVHSGLAYTMER	3	-0.42523	2	71445000	60139000	0.948
P00367	386	K	Glutamate dehydrogenase 1, mitochondrial	GLUD1	1	2.35082e-08	80.117	AKPYEGSILEADCDILIPAASEK(1)QLTK	3	0.89209	2	24256000	29208000	1.152
P00367	211	K	Glutamate dehydrogenase 1, mitochondrial	GLUD1	1	0.00764166	81.296	FTMELAK(1)K	2	-0.36944	3	61997000	66182000	1.069
P00367	457	K	Glutamate dehydrogenase 1, mitochondrial	GLUD1	1	0.0441567	67.169	LTFK(1)YER	2	1.3171	1	0	0
P00367	545	K	Glutamate dehydrogenase 1, mitochondrial	GLUD1	1	7.16251e-07	132.79	TAAYVNAIEK(1)VFK	3	0.59984	2	41019000	39216000	0.984
P00367	352	K	Glutamate dehydrogenase 1, mitochondrial	GLUD1	1	0.000401278	66.826	ELEDFK(1)LQHGSILGFPK	3	0.039825	1	5203200	6397600	1.157
P00367	415	K	Glutamate dehydrogenase 1, mitochondrial	GLUD1	1	1.89556e-08	105.06	IIAEGANGPTTPEADK(1)IFLER	2	0.73059	3	17185000	18119000	0.948
P00387	42	K	NADH-cytochrome b5 reductase 3	CYB5R3	1	1.58119e-05	110.56	STPAITLESPDIK(1)YPLR	2	0.77176	1	0	3915000
P00387	163	K	NADH-cytochrome b5 reductase 3	CYB5R3	1	0.00533175	108.81	FAIRPDK(1)K	2	1.0121	2	35669000	50844000	1.394
P00387	214	K	NADH-cytochrome b5 reductase 3	CYB5R3	1	1.57177e-11	96.123	DPDDHTVCHLLFANQTEK(1)DILLRPELEELR	4	0.051892	1	21140000	34360000	1.414
P00390	456	K	Glutathione reductase, mitochondrial	GSR	1	0.000510007	63.691	TYSTSFTPMYHAVTK(1)R	3	-0.098004	1	20482000	25474000	1.299
P00390	401	K	Glutathione reductase, mitochondrial	GSR	1	0.000580289	99.815	LFEYK(1)EDSK	2	-0.75532	1	25653000	35942000	1.364
P00390	189	K	Glutathione reductase, mitochondrial	GSR	0.999964	5.4298e-09	104.88	GHAAFTSDPKPTIEVSGK(1)K	3	-0.9744	1	16503000	25037000	1.532
P00390	296	K	Glutathione reductase, mitochondrial	GSR	1	0.00944088	72.607	FSQVK(1)EVK	2	-0.57603	1	6880600	11568000	1.614
P00390	470	K	Glutathione reductase, mitochondrial	GSR	1	0.000582021	99.688	MVCANK(1)EEK	2	-0.50058	3	5875400	8418000	1.367
P00390	164	K	Glutathione reductase, mitochondrial	GSR	1	8.67668e-06	81.51	LNAIYQNNLTK(1)SHIEIIR	3	0.45004	1	6434100	8284000	0.334
P00390	110	K	Glutathione reductase, mitochondrial	GSR	1	8.52871e-09	141.37	LGGTCVNVGCVPK(1)K	2	-0.87873	2	27727000	32550000	1.18
P00441	123	K	Superoxide dismutase [Cu-Zn]	SOD1	1	6.14808e-18	198.85	TLVVHEK(1)ADDLGK	3	0.21116	4	93704000	116630000	1.288
P00441	10	K	Superoxide dismutase [Cu-Zn]	SOD1	1	0.0160029	45.069	AVCVLK(1)GDGPVQGIINFEQK	3	2.0874	1	0	6582300
P00480	88	K	Ornithine carbamoyltransferase, mitochondrial	OTC	1	0.00270398	95.502	SLGMIFEK(1)R	2	0.57765	1	0	0
P00491	254	K	Purine nucleoside phosphorylase	PNP	1	2.4611e-16	156.67	VIMDYESLEK(1)ANHEEVLAAGK	3	0.6192	1	10578000	15180000	1.465
P00492	103	K	Hypoxanthine-guanine phosphoribosyltransferase	HPRT1	1	0.00011608	93.478	LK(1)SYCNDQSTGDIK	2	0.47583	2	4988000	7931000	1.534
P00505	363	K	Aspartate aminotransferase, mitochondrial	GOT2	1	0.000986436	93.667	TQLVSNLK(1)K	2	0.76592	1	268400000	247440000	0.921
P00505	296	K	Aspartate aminotransferase, mitochondrial	GOT2	1	0.000871782	99.927	VGAFTMVCK(1)DADEAK	2	-1.1603	1	0	3409300
P00505	185	K	Aspartate aminotransferase, mitochondrial	GOT2	1	9.46111e-15	153.19	YYDPK(1)TCGFDFTGAVEDISK	2	0.33738	4	42859000	35323000	0.945
P00505	234	K	Aspartate aminotransferase, mitochondrial	GOT2	1	0.0106409	73.26	EIATVVK(1)K	2	0.246	4	213830000	194490000	0.9
P00505	94	K	Aspartate aminotransferase, mitochondrial	GOT2	1	4.32582e-18	174.78	NLDK(1)EYLPIGGLAEFCK	3	-0.56488	7	72629000	72045000	1.065
P00505	404	K	Aspartate aminotransferase, mitochondrial	GOT2	1	0.00110181	81.625	EFSIYMTK(1)DGR	2	-0.64619	3	16190000	14367000	1.13
P00558	11	K	Phosphoglycerate kinase 1	PGK1	1	0.000604371	98.044	LTLDK(1)LDVK	2	0.61347	2	124890000	176940000	1.838
P00558	131	K	Phosphoglycerate kinase 1	PGK1	1	3.54744e-05	133.89	FHVEEEGK(1)GK	2	0.58388	2	19390000	27098000	1.448
P00558	91	K	Phosphoglycerate kinase 1	PGK1	1	0.000509627	93.345	SLLGK(1)DVLFLK	2	0.75554	3	105920000	124130000	1.219
P00558	322	K	Phosphoglycerate kinase 1	PGK1	1	0.00740138	45.357	TGQATVASGIPAGWMGLDCGPESSK(1)K	3	-1.1862	1	0	4906000
P00558	48	K	Phosphoglycerate kinase 1	PGK1	1	0.000602092	73.834	AAVPSIK(1)FCLDNGAK	2	-1.1648	2	7973100	13898000	1.49
P00558	353	K	Phosphoglycerate kinase 1	PGK1	1	0.00307468	72.29	GTK(1)ALMDEVVK	2	-0.017229	1	16173000	21150000	1.463
P00558	106	K	Phosphoglycerate kinase 1	PGK1	1	7.21663e-15	124.1	DCVGPEVEK(1)ACANPAAGSVILLENLR	3	0.45046	2	81347000	107340000	1.322
P00558	388	K	Phosphoglycerate kinase 1	PGK1	1	5.22289e-19	148.09	WNTEDK(1)VSHVSTGGGASLELLEGK	3	1.144	3	105840000	138610000	1.89
P00558	156	K	Phosphoglycerate kinase 1	PGK1	1	4.67236e-15	144.27	ASLSK(1)LGDVYVNDAFGTAHR	3	-0.6428	2	35005000	46501000	1.318
P00558	291	K	Phosphoglycerate kinase 1	PGK1	1	2.88199e-19	176.04	ITLPVDFVTADK(1)FDENAK	3	-1.7826	6	79960000	118420000	1.881
P00558	192	K	Phosphoglycerate kinase 1	PGK1	1	0.033616	78.149	K(1)ELNYFAK	2	0.13166	1	0	0
P00558	97	K	Phosphoglycerate kinase 1	PGK1	1	1.86949e-08	138.73	DVLFLK(1)DCVGPEVEK	2	1.1734	5	55002000	80014000	1.477
P00558	323	K	Phosphoglycerate kinase 1	PGK1	1	0.00914599	74.92	K(1)YAEAVTR	2	-0.85903	3	47898000	65454000	1.363
P00558	220	K	Phosphoglycerate kinase 1	PGK1	1	1.11589e-08	141	VADK(1)IQLINNMLDK	3	-0.34025	7	142090000	185850000	1.368
P00558	361	K	Phosphoglycerate kinase 1	PGK1	1	0.00037626	92.856	ALMDEVVK(1)ATSR	2	0.33481	3	21143000	24531000	1.47
P00558	184	K	Phosphoglycerate kinase 1	PGK1	1	7.32066e-06	79.776	AHSSMVGVNLPQK(1)AGGFLMK	3	-0.11722	2	18442000	24188000	1.406
P00558	191	K	Phosphoglycerate kinase 1	PGK1	1	0.0153957	67.981	AGGFLMK(1)K	2	-0.13531	5	208400000	275850000	1.27
P00558	216	K	Phosphoglycerate kinase 1	PGK1	1	0.00197163	50.873	ALESPERPFLAILGGAK(1)VADK	3	1.8356	1	11563000	19566000	1.716
P00846	55	K	ATP synthase subunit a	MT-ATP6	1	0.0340794	47.429	LTSK(1)QMMTMHNTK	2	-1.3841	1	25384000	25765000	0.913
P01024	879	K	Complement C3	C3	1	0.000597686	62.203	VELLHNPAFCSLATTK(1)R	3	0.26785	1	4334300	5548000	1.372
P01893	145	K	Putative HLA class I histocompatibility antigen, alpha chain H	HLA-H	1	8.85568e-06	76.015	GYEQHAYDGK(1)DYIALNEDLR	3	-0.59715	1	13032000	11963000	0.84
P02545	32	K	Prelamin-A/C	LMNA	1	2.46324e-05	100.69	LQEK(1)EDLQELNDR	3	-0.38699	1	100560000	108040000	1.229
P02545	155	K	Prelamin-A/C	LMNA	1	6.0428e-18	205.07	EAALSTALSEK(1)R	2	2.3493	17	878450000	1199300000	1.259
P02545	90	K	Prelamin-A/C	LMNA	1	0.00741818	82.645	K(1)TLDSVAK	2	-0.41295	1	66974000	82190000	1.239
P02545	181	K	Prelamin-A/C	LMNA	1	0.000466904	113.62	K(1)QLQDEMLR	2	0.40365	1	18533000	20309000	1.135
P02545	470	K	Prelamin-A/C	LMNA	1	1.41088e-34	244.58	SNEDQSMGNWQIK(1)R	2	-0.90628	5	43496000	47975000	1.098
P02545	208	K	Prelamin-A/C	LMNA	1	1.4442e-22	207.31	EELDFQK(1)NIYSEELR	2	-0.10272	4	97788000	121110000	1.197
P02545	341	K	Prelamin-A/C	LMNA	1	0.0033711	120.65	LLAEK(1)ER	2	0.039492	19	2134000000	2703700000	1.322
P02545	78	K	Prelamin-A/C	LMNA	1	1.11988e-12	147.09	EVSGIK(1)AAYEAELGDAR	2	-0.84527	5	125840000	151630000	1.322
P02545	180	K	Prelamin-A/C	LMNA	1	0.000240839	112.13	LEAALGEAK(1)K	2	-0.23985	21	4233400000	5477100000	1.33
P02545	144	K	Prelamin-A/C	LMNA	1	5.23499e-14	133.48	LKDLEALLNSK(1)EAALSTALSEK	3	-0.14714	1	113620000	141830000	1.315
P02545	378	K	Prelamin-A/C	LMNA	1	0.000590578	105.98	K(1)LLEGEEER	2	-3.6323	5	62109000	81416000	1.192
P02545	123	K	Prelamin-A/C	LMNA	1	1.19204e-07	144.55	K(1)EGDLIAAQAR	2	-0.69805	7	570950000	731990000	1.313
P02545	233	K	Prelamin-A/C	LMNA	1	4.25176e-05	144.77	LVEIDNGK(1)QR	2	1.6644	6	247470000	330160000	1.268
P02545	97	K	Prelamin-A/C	LMNA	1	0.00153924	80.688	TLDSVAK(1)ER	2	1.2868	4	100020000	139670000	1.336
P02545	108	K	Prelamin-A/C	LMNA	1	0.000577542	100.02	LQLELSK(1)VR	2	1.4067	1	26348000	30076000	1.35
P02545	114	K	Prelamin-A/C	LMNA	1	0.00272794	73.616	VREEFK(1)ELK	2	0.66434	6	77846000	88562000	1.181
P02545	417	K	Prelamin-A/C	LMNA	1	1.32545e-39	243.01	ASSHSSQTQGGGSVTK(1)K	2	-0.24107	6	19200000	22687000	1.196
P02545	135	K	Prelamin-A/C	LMNA	1	6.17182e-07	140.91	LK(1)DLEALLNSK	2	-0.14101	3	87306000	108460000	1.313
P02545	316	K	Prelamin-A/C	LMNA	1	0.00486518	92.491	QLAAK(1)EAK	2	-0.33045	2	90237000	129180000	1.377
P02545	450	K	Prelamin-A/C	LMNA	1	5.30997e-21	188.09	VAVEEVDEEGK(1)FVR	2	-0.75132	5	42306000	49282000	1.361
P02545	201	K	Prelamin-A/C	LMNA	1	1.42844e-13	175.48	LQTMK(1)EELDFQK	2	0.50505	9	166030000	190160000	1.113
P02545	265	K	Prelamin-A/C	LMNA	1	0.00147021	81.95	ELEK(1)TYSAK	2	-0.60091	1	33289000	44077000	1.3
P02545	260	K	Prelamin-A/C	LMNA	1	4.66007e-18	205.86	AQHEDQVEQYK(1)K	2	-0.50634	12	524290000	700080000	1.288
P02545	270	K	Prelamin-A/C	LMNA	1	0.00209788	82.261	TYSAK(1)LDNAR	2	-0.51876	3	24749000	25632000	1.263
P02545	171	K	Prelamin-A/C	LMNA	1	1.89246e-07	124.62	GQVAK(1)LEAALGEAK	2	0.32611	2	95884000	129140000	1.342
P02545	311	K	Prelamin-A/C	LMNA	1	5.60123e-25	200.58	IDSLSAQLSQLQK(1)QLAAK	2	-0.53112	3	42472000	65222000	1.516
P02766	96	K	Transthyretin	TTR	1	0.0113355	82.417	VEIDTK(1)SYWK	2	0.86596	1	0	42791000
P02786	371	K	Transferrin receptor protein 1	TFRC	1	0.0442139	46.352	MVTSESK(1)NVK	2	-1.6714	1	1388800	1674400	1.24
P02786	128	K	Transferrin receptor protein 1	TFRC	1	0.0011502	132.57	LYWDDLK(1)R	2	-0.052704	1	17477000	20813000	1.235
P02786	240	K	Transferrin receptor protein 1	TFRC	1	4.95061e-05	132.25	LVHANFGTK(1)K	3	0.015598	4	61605000	81948000	1.29
P02786	693	K	Transferrin receptor protein 1	TFRC	1	1.13795e-05	76.378	VEYHFLSPYVSPK(1)ESPFR	3	2.544	1	19801000	18073000	1.688
P02786	189	K	Transferrin receptor protein 1	TFRC	1	0.0126575	45.829	DQHFVK(1)IQVK	3	-0.91849	2	9577800	12150000	1.313
P02786	486	K	Transferrin receptor protein 1	TFRC	1	1.23545e-24	191.02	AFTYINLDK(1)AVLGTSNFK	2	1.7836	1	6444100	7260500	1.309
P02786	665	K	Transferrin receptor protein 1	TFRC	1	1.12335e-17	190.85	LTTDFGNAEK(1)TDR	2	1.0398	1	8618300	10123000	1.231
P02786	205	K	Transferrin receptor protein 1	TFRC	1	4.53156e-08	134.02	DSAQNSVIIVDK(1)NGR	2	0.35323	1	10980000	9228000	1.905
P02786	60	K	Transferrin receptor protein 1	TFRC	0.993516	0.0190384	113.71	ANVTK(0.006)PK(0.994)R	2	0.61497	1	12036000	14946000	1.31
P02792	106	K	Ferritin light chain	FTL	1	0.000738121	58.246	K(1)LNQALLDLHALGSAR	3	1.8823	2	10089000	8387000	0.814
P02792	68	K	Ferritin light chain	FTL	1	0.00509211	90.862	LLK(1)MQNQR	2	-0.31393	1	6163800	5698100	0.975
P02792	105	K	Ferritin light chain	FTL	1	0.00794361	79.474	AAMALEK(1)K	2	-0.65359	3	115110000	118090000	0.928
P02794	125	K	Ferritin heavy chain	FTH1	1	2.99327e-14	122.68	LATDK(1)NDPHLCDFIETHYLNEQVK	3	0.40092	3	85493000	62351000	0.81
P04040	243	K	Catalase	CAT	1	0.00194581	67.685	TDQGIK(1)NLSVEDAAR	2	-1.1605	2	14718000	19725000	1.228
P04040	476	K	Catalase	CAT	1	0.00134335	88.181	DAQIFIQK(1)K	2	-0.017379	4	54836000	51883000	0.963
P04040	169	K	Catalase	CAT	1	7.84322e-06	103.83	DPILFPSFIHSQK(1)R	3	0.99398	2	11265000	9860000	1.03
P04040	105	K	Catalase	CAT	1	0.00711116	84.498	VFEHIGK(1)K	2	-0.86936	2	20929000	16075000	0.823
P04062	196	K	Glucosylceramidase	GBA	1	0.00444014	63.565	LK(1)IPLIHR	3	0.19004	1	10034000	5408000	0.55
P04075	147	K	Fructose-bisphosphate aldolase A	ALDOA	1	0.000375245	114.89	DGADFAK(1)WR	2	1.1074	6	70641000	137220000	1.53
P04075	28	K	Fructose-bisphosphate aldolase A	ALDOA	1	2.75167e-11	133.21	IVAPGK(1)GILAADESTGSIAK	3	2.4617	5	61364000	98210000	1.772
P04075	330	K	Fructose-bisphosphate aldolase A	ALDOA	1	0.000324935	122.52	AAQEEYVK(1)R	2	0.96134	8	243910000	358160000	1.605
P04075	111	K	Fructose-bisphosphate aldolase A	ALDOA	1	8.39228e-12	118.63	VDK(1)GVVPLAGTNGETTTQGLDGLSER	3	0.45527	3	49589000	41953000	0.961
P04075	322	K	Fructose-bisphosphate aldolase A	ALDOA	1	3.34327e-07	140.01	ENLK(1)AAQEEYVK	2	1.452	2	19995000	32365000	1.552
P04075	14	K	Fructose-bisphosphate aldolase A	ALDOA	1	1.07378e-05	140.45	K(1)ELSDIAHR	2	0.66295	8	100890000	158600000	1.503
P04075	42	K	Fructose-bisphosphate aldolase A	ALDOA	1	1.33713e-15	171.36	GILAADESTGSIAK(1)R	2	2.9524	15	422680000	623300000	1.481
P04075	200	K	Fructose-bisphosphate aldolase A	ALDOA	1	3.61649e-22	153.82	YASICQQNGIVPIVEPEILPDGDHDLK(1)R	3	0.022348	4	139740000	219800000	1.685
P04075	99	K	Fructose-bisphosphate aldolase A	ALDOA	1	0.00299644	52.527	ADDGRPFPQVIK(1)SK	3	0.77295	1	24206000	29819000	1.181
P04075	312	K	Fructose-bisphosphate aldolase A	ALDOA	1	1.51602e-06	122.46	ALQASALK(1)AWGGK	2	-0.094532	2	8279100	11744000	1.521
P04075	101	K	Fructose-bisphosphate aldolase A	ALDOA	1	0.0518762	43.442	SK(1)GGVVGIK	2	-0.0051347	2	35170000	53294000	1.547
P04075	13	K	Fructose-bisphosphate aldolase A	ALDOA	1	8.45515e-14	178.15	PYQYPALTPEQK(1)K	3	2.4903	9	62590000	143390000	2.378
P04075	140	K	Fructose-bisphosphate aldolase A	ALDOA	1	0.0082652	77.533	K(1)DGADFAK	2	-0.088362	5	158730000	244890000	1.523
P04083	53	K	Annexin A1	ANXA1	1	1.75802e-17	127.66	GGPGSAVSPYPTFNPSSDVAALHK(1)AIMVK	3	-0.9607	3	77780000	136790000	1.994
P04083	71	K	Annexin A1	ANXA1	1	6.31437e-28	228.8	GVDEATIIDILTK(1)R	2	0.63852	16	774610000	1136900000	1.527
P04083	245	K	Annexin A1	ANXA1	1	0.00200342	120.87	YSK(1)HDMNK	2	-0.014722	2	9134500	13377000	1.482
P04083	239	K	Annexin A1	ANXA1	1	0.0264042	65.252	VFQK(1)YTK	2	0.5647	1	8197400	11024000	1.496
P04083	287	K	Annexin A1	ANXA1	1	0.0002175	103.43	LHQAMK(1)GVGTR	3	0.48027	2	13666000	21674000	1.513
P04083	262	K	Annexin A1	ANXA1	1	0.000274252	95.417	GDIEK(1)CLTAIVK	2	2.141	3	85161000	125970000	1.539
P04083	281	K	Annexin A1	ANXA1	1	1.29882e-17	188.09	PAFFAEK(1)LHQAMK	3	-1.2348	12	333650000	516130000	1.546
P04083	166	K	Annexin A1	ANXA1	1	1.39781e-21	196.95	DLAK(1)DITSDTSGDFR	2	0.81243	17	267200000	400080000	1.446
P04083	214	K	Annexin A1	ANXA1	1	1.21935e-08	140.22	K(1)GTDVNVFNTILTTR	2	2.0856	1	1781600	2757500	1.753
P04083	29	K	Annexin A1	ANXA1	1	4.42988e-21	147.17	SSK(1)GGPGSAVSPYPTFNPSSDVAALHK	3	0.055613	2	55087000	98703000	1.847
P04083	257	K	Annexin A1	ANXA1	1	1.15492e-05	118.88	VLDLELK(1)GDIEK	2	-0.56659	4	109680000	151570000	1.29
P04083	128	K	Annexin A1	ANXA1	1	6.7845e-20	167.53	AAMK(1)GLGTDEDTLIEILASR	2	-0.13214	5	87254000	125950000	1.453
P04083	185	K	Annexin A1	ANXA1	1	6.73301e-05	115.33	NALLSLAK(1)GDR	2	0.0019875	3	92011000	127840000	1.414
P04083	97	K	Annexin A1	ANXA1	1	2.59899e-23	195.25	PLDETLK(1)K	2	1.0911	16	505910000	861190000	1.648
P04083	250	K	Annexin A1	ANXA1	1	9.8078e-31	230.96	HDMNK(1)VLDLELK	2	0.54541	13	147000000	210510000	1.441
P04083	332	K	Annexin A1	ANXA1	1	5.07476e-44	235.45	MYGISLCQAILDETK(1)GDYEK	3	-1.1594	3	39389000	54558000	1.372
P04083	58	K	Annexin A1	ANXA1	1	3.19672e-13	146.81	AIMVK(1)GVDEATIIDILTK	3	0.17884	3	45566000	63328000	0.996
P04083	81	K	Annexin A1	ANXA1	1	1.87155e-06	87.352	QQIK(1)AAYLQETGKPLDETLK	3	0.1276	1	13501000	21388000	1.621
P04083	312	K	Annexin A1	ANXA1	1	8.70766e-16	178.15	SEIDMNDIK(1)AFYQK	3	-1.2375	14	364810000	498700000	1.295
P04179	130	K	Superoxide dismutase [Mn], mitochondrial	SOD2	1	0.000606911	97.857	DFGSFDK(1)FK	2	0.67759	8	402360000	235790000	0.567
P04179	75	K	Superoxide dismutase [Mn], mitochondrial	SOD2	1	0.00348798	53.998	YQEALAK(1)GDVTAQIALQPALK	2	-0.57234	1	3563200	2020600	0.542
P04179	68	K	Superoxide dismutase [Mn], mitochondrial	SOD2	1	7.95961e-30	188.04	HHAAYVNNLNVTEEK(1)YQEALAK	4	0.86256	3	100490000	54732000	0.571
P04179	122	K	Superoxide dismutase [Mn], mitochondrial	SOD2	1	0.0017268	82.287	GELLEAIK(1)R	2	-0.36098	3	283930000	166710000	0.588
P04181	421	K	Ornithine aminotransferase, mitochondrial	OAT	1	0.00470865	64.104	FAPPLVIK(1)EDELR	2	0.99205	2	12312000	24230000	2.106
P04181	374	K	Ornithine aminotransferase, mitochondrial	OAT	1	0.00118203	80.037	GK(1)GLLNAIVIK	2	0.55045	2	11812000	26704000	2.014
P04181	386	K	Ornithine aminotransferase, mitochondrial	OAT	1	0.0335469	74.376	ETK(1)DWDAWK	2	0.55398	1	0	14106000
P04181	107	K	Ornithine aminotransferase, mitochondrial	OAT	1	0.00286166	72.705	SQVDK(1)LTLTSR	2	1.4122	2	7287400	9098200	1.147
P04406	334	K	Glyceraldehyde-3-phosphate dehydrogenase	GAPDH	1	2.33137e-06	130.1	VVDLMAHMASK(1)E	2	-1.1657	12	287470000	374010000	1.129
P04406	194	K	Glyceraldehyde-3-phosphate dehydrogenase	GAPDH	1	3.83052e-06	133.81	TVDGPSGK(1)LWR	2	1.0169	7	115220000	162680000	1.413
P04406	139	K	Glyceraldehyde-3-phosphate dehydrogenase	GAPDH	1	2.23267e-21	155.61	VIISAPSADAPMFVMGVNHEK(1)YDNSLK	3	2.5628	21	774330000	1153900000	1.562
P04406	61	K	Glyceraldehyde-3-phosphate dehydrogenase	GAPDH	1	5.02268e-15	199.12	FHGTVK(1)AENGK	2	0.88899	4	23224000	30776000	1.361
P04406	263	K	Glyceraldehyde-3-phosphate dehydrogenase	GAPDH	1	0.000263976	99.752	VVK(1)QASEGPLK	2	0.10123	6	52494000	73217000	1.629
P04406	227	K	Glyceraldehyde-3-phosphate dehydrogenase	GAPDH	1	1.3874e-05	94.532	VIPELNGK(1)LTGMAFR	3	-0.51122	4	68613000	84573000	1.374
P04406	215	K	Glyceraldehyde-3-phosphate dehydrogenase	GAPDH	1	2.19078e-08	103.66	GALQNIIPASTGAAK(1)AVGK	2	-0.55431	5	60571000	117150000	1.442
P04406	254	K	Glyceraldehyde-3-phosphate dehydrogenase	GAPDH	1	0.000288394	118.91	PAK(1)YDDIKK	2	1.2464	7	43992000	117340000	1.596
P04406	219	K	Glyceraldehyde-3-phosphate dehydrogenase	GAPDH	1	0.000522363	89.189	AVGK(1)VIPELNGK	2	0.48437	2	19670000	26615000	1.45
P04406	117	K	Glyceraldehyde-3-phosphate dehydrogenase	GAPDH	1	9.76257e-07	134.23	AGAHLQGGAK(1)R	3	0.29969	38	1908300000	2703400000	1.364
P04406	86	K	Glyceraldehyde-3-phosphate dehydrogenase	GAPDH	1	7.83844e-11	119.34	IK(1)WGDAGAEYVVESTGVFTTMEK	3	-0.22341	2	21699000	23015000	1.201
P04632	172	K	Calpain small subunit 1	CAPNS1	1	0.000267194	120.65	YLWNNIK(1)R	2	0.42993	3	25060000	30896000	1.486
P04632	179	K	Calpain small subunit 1	CAPNS1	1	1.64194e-13	178.1	WQAIYK(1)QFDTDR	2	-0.14167	2	13365000	14570000	1.213
P04792	114	K	Heat shock protein beta-1	HSPB1	1	0.00103989	82.85	TK(1)DGVVEITGK	2	-0.043075	7	175510000	212570000	1.273
P04843	281	K	Dolichyl-diphosphooligosaccharide--protein glycosyltransferase subunit 1	RPN1	1	4.87376e-13	148.7	SFK(1)TILPAAAQDVYYR	2	0.5349	3	13429000	12279000	0.944
P04843	559	K	Dolichyl-diphosphooligosaccharide--protein glycosyltransferase subunit 1	RPN1	1	7.44359e-05	114.76	LDAQVK(1)ELVLK	2	0.81319	3	78580000	78617000	0.968
P04843	516	K	Dolichyl-diphosphooligosaccharide--protein glycosyltransferase subunit 1	RPN1	1	0.000102802	120.27	DISTLNSGK(1)K	2	0.43996	4	87164000	84476000	1.062
P04843	538	K	Dolichyl-diphosphooligosaccharide--protein glycosyltransferase subunit 1	RPN1	1	0.00420622	70.089	LK(1)TEGSDLCDR	2	0.72636	1	3093000	2647500	0.843
P04844	627	K	Dolichyl-diphosphooligosaccharide--protein glycosyltransferase subunit 2	RPN2	1	0.000339867	117.4	MLAQQAVK(1)R	2	0.17591	5	63441000	77791000	1.281
P04844	385	K	Dolichyl-diphosphooligosaccharide--protein glycosyltransferase subunit 2	RPN2	1	3.13474e-07	90.475	ISTEVGITNVDLSTVDK(1)DQSIAPK	3	2.7134	1	11972000	9406500	0.897
P04844	311	K	Dolichyl-diphosphooligosaccharide--protein glycosyltransferase subunit 2	RPN2	1	0.000102081	118.9	LEHAK(1)SVASR	2	0.22896	2	5911800	5556100	0.924
P04899	35	K	Guanine nucleotide-binding protein G(i) subunit alpha-2	GNAI2	1	2.47823e-05	106.3	EVK(1)LLLLGAGESGK	2	-1.2583	2	12649000	16743000	1.538
P04899	46	K	Guanine nucleotide-binding protein G(i) subunit alpha-2	GNAI2	1	1.77109e-06	109.55	LLLLGAGESGK(1)STIVK	2	0.70051	2	9436600	12628000	1.397
P04899	318	K	Guanine nucleotide-binding protein G(i) subunit alpha-2	GNAI2	1	9.23316e-25	206.62	DTK(1)EIYTHFTCATDTK	2	0.32253	2	23808000	25336000	1.43
P04899	51	K	Guanine nucleotide-binding protein G(i) subunit alpha-2	GNAI2	1	0.00894636	73.26	STIVK(1)QMK	2	0.82451	1	8446300	14281000	2.083
P04899	193	K	Guanine nucleotide-binding protein G(i) subunit alpha-2	GNAI2	1	3.07039e-07	108.18	TTGIVETHFTFK(1)DLHFK	3	-0.26996	3	15503000	19466000	1.87
P04899	249	K	Guanine nucleotide-binding protein G(i) subunit alpha-2	GNAI2	1	0.000889499	61.657	MHESMK(1)LFDSICNNK	3	0.43801	1	7624900	11089000	2.039
P04899	313	K	Guanine nucleotide-binding protein G(i) subunit alpha-2	GNAI2	1	0.014048	91.906	FEDLNK(1)R	2	-1.0553	4	14374000	51808000	2.547
P05023	21	K	Sodium/potassium-transporting ATPase subunit alpha-1	ATP1A1	1	7.58718e-05	108.63	DKYEPAAVSEQGDK(1)K	2	-0.37293	1	931450	1551300	1.719
P05023	36	K	Sodium/potassium-transporting ATPase subunit alpha-1	ATP1A1	1	0.00201031	72.138	DRDMDELK(1)K	3	0.75137	5	30081000	45353000	1.509
P05023	45	K	Sodium/potassium-transporting ATPase subunit alpha-1	ATP1A1	1	0.0116079	41.542	EVSMDDHK(1)LSLDELHR	4	-0.94006	1	13786000	16897000	1.432
P05023	683	K	Sodium/potassium-transporting ATPase subunit alpha-1	ATP1A1	1	7.69353e-07	95.5	DMTSEQLDDILK(1)YHTEIVFAR	3	-0.7676	1	5452400	6744300	1.416
P05023	444	K	Sodium/potassium-transporting ATPase subunit alpha-1	ATP1A1	1	7.96274e-35	242.79	AVFQANQENLPILK(1)R	2	0.087236	2	25813000	40616000	1.549
P05023	1019	K	Sodium/potassium-transporting ATPase subunit alpha-1	ATP1A1	1	0.0311864	67.385	RPGGWVEK(1)ETYY	2	-0.30967	1	8157300	12396000	1.403
P05023	773	K	Sodium/potassium-transporting ATPase subunit alpha-1	ATP1A1	1	0.00806024	78.77	LIFDNLK(1)K	2	-0.78293	4	164970000	274500000	1.738
P05023	54	K	Sodium/potassium-transporting ATPase subunit alpha-1	ATP1A1	1	0.00548534	94.309	K(1)YGTDLSR	2	-0.22032	2	35215000	50597000	1.442
P05026	21	K	Sodium/potassium-transporting ATPase subunit beta-1	ATP1B1	1	0.00589233	91.853	FIWNSEK(1)K	2	0.32536	1	23761000	47425000	1.91
P05026	216	K	Sodium/potassium-transporting ATPase subunit beta-1	ATP1B1	1	1.42503e-10	142.38	YNPNVLPVQCTGK(1)R	3	0.11051	2	6639700	11290000	1.508
P05026	288	K	Sodium/potassium-transporting ATPase subunit beta-1	ATP1B1	1	1.4073e-09	147.1	AYGENIGYSEK(1)DR	2	0.41079	2	8298400	13989000	1.632
P05026	113	K	Sodium/potassium-transporting ATPase subunit beta-1	ATP1B1	1	0.00758386	97.033	YK(1)DSAQR	2	-0.73227	2	9944700	14150000	1.542
P05089	33	K	Arginase-1	ARG1	1	0.0376436	60.682	K(1)AGLLEK	2	1.7078	1	8955000	10744000	1.294
P05091	159	K	Aldehyde dehydrogenase, mitochondrial	ALDH2	1	9.84927e-06	81.157	YHGK(1)TIPIDGDFFSYTR	3	0.077614	2	19321000	11478000	0.63
P05091	155	K	Aldehyde dehydrogenase, mitochondrial	ALDH2	1	0.000337111	93.839	YYAGWADK(1)YHGK	2	-0.67698	2	13789000	10107000	0.805
P05091	280	K	Aldehyde dehydrogenase, mitochondrial	ALDH2	1	6.64004e-11	163.51	VIQVAAGSSNLK(1)R	3	-3.5396	7	83301000	50171000	0.672
P05091	428	K	Aldehyde dehydrogenase, mitochondrial	ALDH2	1	0.00987404	61.344	FK(1)TIEEVVGR	2	0.45373	1	6580300	4948500	0.898
P05091	368	K	Aldehyde dehydrogenase, mitochondrial	ALDH2	1	7.30983e-11	153	TEQGPQVDETQFK(1)K	2	-1.0061	3	34256000	26276000	0.716
P05091	78	K	Aldehyde dehydrogenase, mitochondrial	ALDH2	0.999028	2.5014e-17	122.53	TFPTVNPSTGEVICQVAEGDK(0.001)EDVDK(0.999)AVK	3	-0.05054	1	90058000	68470000	0.851
P05091	378	K	Aldehyde dehydrogenase, mitochondrial	ALDH2	1	0.000141946	92.039	ILGYINTGK(1)QEGAK	2	0.17305	1	4283000	3382900	0.779
P05141	147	K	ADP/ATP translocase 2	SLC25A5	1	5.73684e-05	113.24	LAADVGK(1)AGAER	2	0.68534	9	239770000	275760000	1.129
P05141	33	K	ADP/ATP translocase 2	SLC25A5	1	2.16311e-13	175.48	VK(1)LLLQVQHASK	2	0.44488	4	78805000	106500000	1.435
P05141	272	K	ADP/ATP translocase 2	SLC25A5	1	4.53404e-05	114.72	AFFK(1)GAWSNVLR	2	1.2758	1	16826000	25187000	1.316
P05141	63	K	ADP/ATP translocase 2	SLC25A5	1	2.79174e-09	148.96	IPK(1)EQGVLSFWR	2	-0.85535	5	200180000	263530000	1.427
P05141	199	K	ADP/ATP translocase 2	SLC25A5	1	0.000318416	73.918	AAYFGIYDTAK(1)GMLPDPK	2	-0.12735	3	41556000	71183000	1.763
P05141	268	K	ADP/ATP translocase 2	SLC25A5	1	0.00179218	76.064	DEGGK(1)AFFK	2	0.40324	6	106550000	145910000	1.332
P05141	92	K	ADP/ATP translocase 2	SLC25A5	1	2.40915e-07	119.87	YFPTQALNFAFK(1)DK	3	-0.017053	6	183820000	260390000	1.495
P05141	163	K	ADP/ATP translocase 2	SLC25A5	1	0.00314785	97.813	GLGDCLVK(1)IYK	2	-0.070318	3	24992000	69531000	1.328
P05141	10	K	ADP/ATP translocase 2	SLC25A5	1	1.26066e-06	92.792	TDAAVSFAK(1)DFLAGGVAAAISK	3	0.2725	1	7829100	9386700	1.293
P05141	23	K	ADP/ATP translocase 2	SLC25A5	1	2.9546e-09	111.4	DFLAGGVAAAISK(1)TAVAPIER	3	0.46502	1	9253300	10012000	1.174
P05141	43	K	ADP/ATP translocase 2	SLC25A5	1	3.23496e-31	212.95	LLLQVQHASK(1)QITADK	3	0.0097961	6	123380000	147900000	1.313
P05141	96	K	ADP/ATP translocase 2	SLC25A5	1	0.000344954	96.604	YK(1)QIFLGGVDK	2	0.21845	6	285180000	389210000	1.367
P05141	105	K	ADP/ATP translocase 2	SLC25A5	1	0.000712186	94.465	QIFLGGVDK(1)R	2	0.011501	7	425980000	489860000	1.17
P05166	525	K	Propionyl-CoA carboxylase beta chain, mitochondrial	PCCB	1	0.000326199	95.417	ICCDLDVLASK(1)K	2	-1.6723	1	14721000	7981000	0.987
P05198	141	K	Eukaryotic translation initiation factor 2 subunit 1	EIF2S1	1	0.00922479	62.466	TAWVFDDK(1)YK	2	-1.2883	2	9254400	9198100	1.004
P05362	66	K	Intercellular adhesion molecule 1	ICAM1	1	0.00595284	68.536	LLGIETPLPK(1)K	2	0.033404	1	2373600	12386000	4.251
P05387	25	K	60S acidic ribosomal protein P2	RPLP2	1	3.99823e-05	101.42	K(1)ILDSVGIEADDDR	2	2.0423	1	10564000	17862000	1.773
P05388	92	K	60S acidic ribosomal protein P0	RPLP0	1	2.64405e-18	182.35	GNVGFVFTK(1)EDLTEIR	2	0.53472	1	5671200	7601000	1.351
P05388	50	K	60S acidic ribosomal protein P0	RPLP0	1	0.00501285	69.812	GK(1)AVVLMGK	2	1.5418	2	8496600	13750000	1.427
P05455	276	K	Lupus La protein	SSB	1	0.0013134	84.817	EGIILFK(1)EK	2	0.16837	1	5807900	8009700	1.355
P05455	95	K	Lupus La protein	SSB	1	0.00658242	85.909	SPSK(1)PLPEVTDEYK	2	-0.53626	1	0	6702700
P05455	165	K	Lupus La protein	SSB	1	6.56851e-11	143.05	GSIFVVFDSIESAK(1)K	2	-0.38399	3	41377000	45666000	1.169
P05455	9	K	Lupus La protein	SSB	1	0.00415946	93.424	AENGDNEK(1)MAALEAK	2	-1.2169	1	7102600	6278600	0.959
P05455	176	K	Lupus La protein	SSB	1	8.92819e-06	122.55	YK(1)ETDLLILFK	2	-0.95914	2	14039000	17688000	1.201
P05455	269	K	Lupus La protein	SSB	1	0.0105547	60.167	GAK(1)EGIILFK	2	-0.9163	1	13331000	17279000	1.145
P05455	360	K	Lupus La protein	SSB	1	0.0207773	73.039	VQFQGK(1)K	2	0.26784	2	88758000	120110000	1.596
P05455	312	K	Lupus La protein	SSB	1	1.81158e-10	140.96	EVTWEVLEGEVEK(1)EALK	3	-0.33914	2	3759200	7278900	1.899
P05455	229	K	Lupus La protein	SSB	1	2.93063e-06	135.8	SLEEK(1)IGCLLK	2	0.65303	2	21557000	26087000	1.237
P05455	37	K	Lupus La protein	SSB	1	0.00353888	119.57	FLK(1)EQIK	2	-0.24851	2	49814000	60765000	1.117
P05455	86	K	Lupus La protein	SSB	1	3.53048e-06	120.53	AELMEISEDK(1)TK	2	-1.182	3	33803000	41927000	1.065
P05455	76	K	Lupus La protein	SSB	1	0.000505444	89.613	SK(1)AELMEISEDK	2	0.1189	2	17823000	21417000	1.275
P05455	105	K	Lupus La protein	SSB	1	7.45124e-08	109.72	SPSKPLPEVTDEYK(1)NDVK	3	0.15458	1	7606100	11950000	1.623
P05556	765	K	Integrin beta-1	ITGB1	1	0.00883784	93.195	EFAK(1)FEK	2	-0.75685	2	11827000	11937000	1.248
P05556	228	K	Integrin beta-1	ITGB1	1	3.97742e-32	215.49	NVLSLTNK(1)GEVFNELVGK	3	-0.70925	4	33943000	31645000	1.084
P05556	774	K	Integrin beta-1	ITGB1	1	3.59853e-05	100.11	MNAK(1)WDTGENPIYK	2	-0.54031	2	11878000	8862000	1.005
P05556	678	K	Integrin beta-1	ITGB1	1	3.4332e-06	99.747	DK(1)LPQPVQPDPVSHCK	2	-0.324	4	51571000	51625000	1.018
P05556	794	K	Integrin beta-1	ITGB1	1	0.00551975	58.079	SAVTTVVNPK(1)YEGK	2	0.061485	1	3819200	3674900	1.16
P05556	438	K	Integrin beta-1	ITGB1	1	0.0417025	57.708	K(1)DSDSFK	2	0.34592	1	14141000	10466000	0.723
P05783	81	K	Keratin, type I cytoskeletal 18	KRT18	1	7.50792e-53	211.11	GGMGSGGLATGIAGGLAGMGGIQNEK(1)ETMQSLNDR	3	-0.23472	10	235390000	165860000	0.715
P05783	426	K	Keratin, type I cytoskeletal 18	KRT18	1	4.02279e-13	166.14	VVSETNDTK(1)VLR	2	-3.6346	20	1142700000	1030000000	0.891
P05783	187	K	Keratin, type I cytoskeletal 18	KRT18	1	0.000293243	109.16	K(1)VIDDTNITR	2	-0.028075	5	210030000	135180000	0.645
P05783	417	K	Keratin, type I cytoskeletal 18	KRT18	1	2.51038e-15	170.74	IVDGK(1)VVSETNDTK	2	1.0474	29	1045900000	819640000	0.786
P05783	247	K	Keratin, type I cytoskeletal 18	KRT18	1	2.31519e-13	174.72	SQDLAK(1)IMADIR	2	0.42127	27	1635200000	1249300000	0.759
P05783	222	K	Keratin, type I cytoskeletal 18	KRT18	1	2.72443e-21	158.67	NHEEEVK(1)GLQAQIASSGLTVEVDAPK	3	0.50219	2	125190000	81497000	0.761
P05976	141	K	Myosin light chain 1/3, skeletal muscle isoform	MYL1	1	1.06397e-23	186.77	VFDK(1)EGNGTVMGAELR	2	1.3429	4	23263000	30279000	1.362
P06493	274	K	Cyclin-dependent kinase 1	CDK1	1	0.0229809	73.233	MLIYDPAK(1)R	2	0.96118	1	0	13576000
P06493	139	K	Cyclin-dependent kinase 1	CDK1	0.999998	0.0027364	64.537	DLKPQNLLIDDK(1)GTIK	3	1.4141	1	0	13122000
P06576	124	K	ATP synthase subunit beta, mitochondrial	ATP5B	1	0.00205586	73.082	GQK(1)VLDSGAPIK	2	0.062782	4	62711000	70447000	1.161
P06576	426	K	ATP synthase subunit beta, mitochondrial	ATP5B	1	8.14523e-05	121.6	GVQK(1)ILQDYK	2	0.7818	1	26499000	28291000	1.13
P06576	201	K	ATP synthase subunit beta, mitochondrial	ATP5B	1	0.020936	57.434	GGK(1)IGLFGGAGVGK	2	-1.7958	3	5790600	22262000	1.217
P06576	198	K	ATP synthase subunit beta, mitochondrial	ATP5B	1	0.000685215	77.185	VVDLLAPYAK(1)GGK	2	1.6181	2	48208000	45648000	1.024
P06576	133	K	ATP synthase subunit beta, mitochondrial	ATP5B	1	2.27874e-05	84.551	VLDSGAPIK(1)IPVGPETLGR	2	0.59502	1	8785700	10328000	1.198
P06576	485	K	ATP synthase subunit beta, mitochondrial	ATP5B	1	0.0342228	48.091	LVPLK(1)ETIK	2	-0.16316	1	146600000	154250000	1.092
P06703	35	K	Protein S100-A6	S100A6	0.983369	0.000115091	145.99	K(0.017)ELK(0.983)ELIQK	2	0.021935	2	7527000	17325000	1.913
P06703	32	K	Protein S100-A6	S100A6	0.904396	0.000176071	97.565	K(0.904)ELK(0.096)ELIQK	3	0.86818	1	6237000	14026000	2.03
P06703	40	K	Protein S100-A6	S100A6	1	0.000123198	105.13	ELIQK(1)ELTIGSK	2	1.1048	4	107820000	171050000	1.561
P06703	26	K	Protein S100-A6	S100A6	1	0.000127082	133.75	EGDK(1)HTLSK	3	-0.47608	9	177800000	269450000	1.457
P06703	47	K	Protein S100-A6	S100A6	1	1.3456e-06	114.7	ELTIGSK(1)LQDAEIAR	3	1.5452	2	24220000	44688000	1.667
P06733	330	K	Alpha-enolase	ENO1	1	0.0216893	56.432	IAK(1)AVNEK	2	0.71744	1	4532700	5535800	1.175
P06733	71	K	Alpha-enolase	ENO1	1	4.37278e-18	179.74	AVEHINK(1)TIAPALVSK	2	-1.0503	5	46377000	62089000	1.468
P06733	80	K	Alpha-enolase	ENO1	1	0.000110294	103.18	TIAPALVSK(1)K	2	-0.47047	13	1719100000	2468400000	1.505
P06733	262	K	Alpha-enolase	ENO1	1	0.0040459	95.264	YDLDFK(1)SPDDPSR	2	-0.88276	1	0	34215000
P06733	193	K	Alpha-enolase	ENO1	1	0.00570733	50.088	IGAEVYHNLK(1)NVIK	3	1.6302	1	6860700	7093900	1.163
P06733	420	K	Alpha-enolase	ENO1	1	0.000414635	97.813	IEEELGSK(1)AK	2	-0.29773	4	72182000	133030000	1.479
P06733	281	K	Alpha-enolase	ENO1	1	1.35562e-05	93.226	YISPDQLADLYK(1)SFIK	2	0.87352	2	20234000	31857000	1.554
P06733	126	K	Alpha-enolase	ENO1	1	0.000271866	95.477	AGAVEK(1)GVPLYR	2	-0.57986	6	274240000	412330000	1.68
P06733	233	K	Alpha-enolase	ENO1	1	0.000230538	102.4	TAIGK(1)AGYTDK	2	0.082508	3	140030000	209060000	1.452
P06733	28	K	Alpha-enolase	ENO1	1	2.33636e-18	180.1	GNPTVEVDLFTSK(1)GLFR	2	-0.68565	7	49411000	74823000	1.287
P06733	228	K	Alpha-enolase	ENO1	1	6.05753e-05	112.84	EGLELLK(1)TAIGK	2	0.62086	4	34793000	49194000	1.42
P06733	64	K	Alpha-enolase	ENO1	1	2.88985e-08	158.56	GVSK(1)AVEHINK	2	-0.19169	8	123150000	173760000	1.387
P06733	326	K	Alpha-enolase	ENO1	1	7.41353e-55	256.11	FTASAGIQVVGDDLTVTNPK(1)R	3	0.712	4	41581000	238820000	1.472
P06733	406	K	Alpha-enolase	ENO1	1	0.00126644	85.676	LAK(1)YNQLLR	2	0.11402	4	112740000	144330000	1.394
P06733	92	K	Alpha-enolase	ENO1	1	2.51038e-15	170.74	IDK(1)LMIEMDGTENK	2	-0.40213	9	225990000	287820000	1.339
P06733	81	K	Alpha-enolase	ENO1	1	8.42287e-05	138.08	K(1)LNVTEQEK	2	0.024456	2	22590000	31695000	1.483
P06733	103	K	Alpha-enolase	ENO1	1	1.61574e-10	162.22	LMIEMDGTENK(1)SK	2	-0.20219	6	95194000	136120000	1.473
P06733	256	K	Alpha-enolase	ENO1	1	0.0296303	49.3	SGK(1)YDLDFK	2	0.61102	1	39357000	50518000	1.336
P06733	335	K	Alpha-enolase	ENO1	1	1.39907e-10	162.49	AVNEK(1)SCNCLLLK	2	-0.29587	2	75431000	106790000	1.474
P06733	89	K	Alpha-enolase	ENO1	1	3.28698e-22	209.19	LNVTEQEK(1)IDK	2	0.42775	4	92168000	130350000	1.485
P06733	5	K	Alpha-enolase	ENO1	1	0.04101	119.29	SILK(1)IHAR	2	-0.38428	1	146180000	184110000	1.334
P06737	724	K	Glycogen phosphorylase, liver form	PYGL	1	0.0122577	60.598	IDDVAALDK(1)K	2	-1.1941	1	20340000	15448000	0.788
P06737	10	K	Glycogen phosphorylase, liver form	PYGL	1	0.0210715	80.165	PLTDQEK(1)R	2	-0.056542	2	7463200	24256000	1.043
P06737	29	K	Glycogen phosphorylase, liver form	PYGL	1	1.66607e-06	123.95	GIVGVENVAELK(1)K	2	0.85418	1	4228100	4574200	1.014
P06744	142	K	Glucose-6-phosphate isomerase	GPI	1	0.0164511	52.903	SGDWK(1)GYTGK	2	1.346	1	7830700	9205400	1.462
P06744	234	K	Glucose-6-phosphate isomerase	GPI	1	9.0057e-06	110.35	EWFLQAAK(1)DPSAVAK	2	-0.085509	2	13416000	17930000	1.508
P06744	241	K	Glucose-6-phosphate isomerase	GPI	1	9.82471e-08	105.79	DPSAVAK(1)HFVALSTNTTK	3	-0.47077	2	7774000	9790800	1.392
P06744	12	K	Glucose-6-phosphate isomerase	GPI	1	3.71026e-13	167.71	DPQFQK(1)LQQWYR	2	0.21172	4	54267000	76331000	1.25
P06744	454	K	Glucose-6-phosphate isomerase	GPI	1	1.2568e-07	130.47	ELQAAGK(1)SPEDLER	2	-0.47261	1	9715300	14513000	1.524
P06744	116	K	Glucose-6-phosphate isomerase	GPI	1	3.61592e-13	149.24	SNTPILVDGK(1)DVMPEVNK	2	-0.28816	8	54728000	108260000	1.53
P06744	34	K	Glucose-6-phosphate isomerase	GPI	1	0.000437442	138.54	LFDANK(1)DR	2	0.25699	6	122030000	161750000	1.376
P06744	89	K	Glucose-6-phosphate isomerase	GPI	1	1.62108e-09	156.02	MFNGEK(1)INYTEGR	2	1.1281	6	29659000	99151000	1.445
P06744	73	K	Glucose-6-phosphate isomerase	GPI	1	0.000255718	123.86	MLVDLAK(1)SR	2	-0.037621	6	904460000	1286600000	1.424
P06748	27	K	Nucleophosmin	NPM1	1	0.00311373	108.81	ADK(1)DYHFK	2	-0.31662	16	959570000	979120000	1.046
P06748	32	K	Nucleophosmin	NPM1	1	6.63929e-26	205.06	DYHFK(1)VDNDENEHQLSLR	3	0.47749	6	83491000	88187000	1.146
P06748	248	K	Nucleophosmin	NPM1	1	2.28384e-05	105.46	GPSSVEDIK(1)AK	2	0.074029	8	408980000	269090000	1.116
P06748	273	K	Nucleophosmin	NPM1	1	4.2268e-06	145.72	FINYVK(1)NCFR	2	-0.88889	2	101520000	139150000	1.342
P06748	250	K	Nucleophosmin	NPM1	1	0.000168836	123.86	AK(1)MQASIEK	2	-2.1121	3	34555000	45185000	1.284
P06748	267	K	Nucleophosmin	NPM1	1	0.00036177	101.38	VEAK(1)FINYVK	2	0.50801	4	92836000	121190000	1.337
P06748	24	K	Nucleophosmin	NPM1	0.980401	6.02763e-12	97.352	MEDSMDMDMSPLRPQNYLFGCELK(0.98)ADK(0.02)DYHFK	4	-1.8835	1	8943700	12319000
P06748	229	K	Nucleophosmin	NPM1	1	0.0199891	73.616	GQESFK(1)K	2	-0.44002	3	199710000	265740000	1.333
P06748	141	K	Nucleophosmin	NPM1	1	0.00139741	130.22	LLSISGK(1)R	2	-0.27957	22	1614200000	2120800000	1.454
P06748	257	K	Nucleophosmin	NPM1	1	4.54157e-07	133.16	MQASIEK(1)GGSLPK	2	-0.12566	15	561660000	759450000	1.369
P06748	54	K	Nucleophosmin	NPM1	1	5.83936e-12	106.11	TVSLGAGAK(1)DELHIVEAEAMNYEGSPIK	3	0.26476	1	21551000	24143000	1.325
P06748	223	K	Nucleophosmin	NPM1	1	0.00657484	80.219	SK(1)GQESFK	2	0.68518	1	9375900	10324000	1.106
P06748	150	K	Nucleophosmin	NPM1	1	0.00103473	76.326	SAPGGGSK(1)VPQK	2	0.39157	2	34774000	49175000	1.434
P06753	234	K	Tropomyosin alpha-3 chain	TPM3	1	0.010917	86.833	LK(1)EAETR	2	0.50435	2	11580000	21274000	1.999
P06753	232	K	Tropomyosin alpha-3 chain	TPM3	1	0.0101937	89.046	ILTDK(1)LK	2	-0.32332	5	114070000	301990000	2.661
P06753	141	K	Tropomyosin alpha-3 chain	TPM3	0.883848	1.32434e-05	78.244	ALK(0.116)DEEK(0.884)MELQEIQLK	3	0.06291	1	14111000	42198000	2.387
P06756	112	K	Integrin alpha-V	ITGAV	1	0.0507137	46.643	DYAK(1)DDPLEFK	2	-0.65188	1	0	0
P06756	645	K	Integrin alpha-V	ITGAV	1	0.00011596	112.94	LEVSVDSDQK(1)K	2	-1.5421	2	12235000	8571300	0.766
P07099	104	K	Epoxide hydrolase 1	EPHX1	1	0.0376436	60.682	NEFDWK(1)K	2	-0.36094	2	72002000	49249000	0.681
P07099	92	K	Epoxide hydrolase 1	EPHX1	1	0.0573626	51.335	K(1)VISYWR	2	0.17264	1	40446000	18162000	0.367
P07099	375	K	Epoxide hydrolase 1	EPHX1	1	4.36386e-11	156.24	FYK(1)ENLGQGWMTQK	2	-0.3514	1	5179100	3988400	0.838
P07099	286	K	Epoxide hydrolase 1	EPHX1	1	0.00364776	71.176	DVELLYPVK(1)EK	2	1.0062	2	38997000	25858000	0.672
P07099	91	K	Epoxide hydrolase 1	EPHX1	1	4.79433e-09	105.91	FTPPLEDSCFHYGFNSNYLK(1)K	3	0.30832	4	75082000	61244000	0.867
P07099	386	K	Epoxide hydrolase 1	EPHX1	1	6.297e-05	87.083	ENLGQGWMTQK(1)HER	3	-0.29845	1	5575200	5463700	0.756
P07099	288	K	Epoxide hydrolase 1	EPHX1	1	0.00723721	100.25	EK(1)VFYSLMR	2	-0.61604	1	0	21853000
P07108	8	K	Acyl-CoA-binding protein	DBI	1	9.60841e-08	146.96	SQAEFEK(1)AAEEVR	2	-0.57374	1	3948300	5315600	1.412
P07108	67	K	Acyl-CoA-binding protein	DBI	1	0.0142073	83.948	GTSK(1)EDAMK	2	0.29413	1	0	15039000
P07108	77	K	Acyl-CoA-binding protein	DBI	1	0.000319673	104.22	AYINK(1)VEELK	2	-0.026137	2	15091000	26426000	1.716
P07108	72	K	Acyl-CoA-binding protein	DBI	1	0.000620136	94.087	EDAMK(1)AYINK	2	0.91856	3	16690000	25550000	1.629
P07108	17	K	Acyl-CoA-binding protein	DBI	0.98924	9.84019e-08	104.84	HLK(0.989)TK(0.011)PSDEEMLFIYGHYK	3	-1.4616	1	0	7249600
P07108	55	K	Acyl-CoA-binding protein	DBI	1	0.00701673	91.752	AK(1)WDAWNELK	2	0.028173	1	0	19727000
P07195	233	K	L-lactate dehydrogenase B chain	LDHB	1	4.54909e-17	185.74	EVHK(1)MVVESAYEVIK	2	-0.51112	3	20633000	23790000	1.367
P07195	156	K	L-lactate dehydrogenase B chain	LDHB	1	0.0029105	111.01	LSGLPK(1)HR	2	-0.29301	2	5137000	7987000	1.522
P07195	310	K	L-lactate dehydrogenase B chain	LDHB	1	4.16641e-06	145.99	LK(1)DDEVAQLK	2	-0.43879	3	101230000	131290000	1.355
P07195	7	K	L-lactate dehydrogenase B chain	LDHB	1	1.99561e-09	130.01	EK(1)LIAPVAEEEATVPNNK	3	-0.59001	4	100090000	134310000	1.405
P07195	308	K	L-lactate dehydrogenase B chain	LDHB	1	6.83584e-08	150.81	GLTSVINQK(1)LK	2	0.18548	2	10577000	14227000	1.391
P07195	60	K	L-lactate dehydrogenase B chain	LDHB	1	1.42649e-20	178.72	LK(1)GEMMDLQHGSLFLQTPK	3	-0.51355	2	62736000	75096000	1.326
P07195	318	K	L-lactate dehydrogenase B chain	LDHB	1	3.42572e-05	131.69	LKDDEVAQLK(1)K	2	0.14156	5	329430000	486950000	1.473
P07195	82	K	L-lactate dehydrogenase B chain	LDHB	1	4.96799e-11	155.14	IVADK(1)DYSVTANSK	2	2.4413	2	41866000	49909000	1.171
P07199	96	K	Major centromere autoantigen B	CENPB	1	0.0468644	44.847	AAGLPVK(1)GIILK	2	0.42401	1	3366600	4652800	1.353
P07237	271	K	Protein disulfide-isomerase	P4HB	1	1.39498e-17	186.58	SVSDYDGK(1)LSNFK	2	-1.6846	12	223580000	258770000	1.198
P07237	130	K	Protein disulfide-isomerase	P4HB	1	1.11693e-16	208.33	EADDIVNWLK(1)K	2	-0.9087	4	52493000	74617000	1.234
P07237	276	K	Protein disulfide-isomerase	P4HB	1	0.000118928	105.66	LSNFK(1)TAAESFK	2	0.91408	1	21260000	24425000	1.257
P07237	370	K	Protein disulfide-isomerase	P4HB	1	0.00601511	68.016	QPVK(1)VLVGK	2	-0.44378	2	17505000	18894000	1.364
P07237	385	K	Protein disulfide-isomerase	P4HB	1	1.76475e-06	138.99	NFEDVAFDEK(1)K	2	-0.41266	10	406970000	489020000	1.221
P07237	71	K	Protein disulfide-isomerase	P4HB	1	0.00327329	72.928	LK(1)AEGSEIR	2	1.6534	1	18459000	25826000	1.407
P07237	207	K	Protein disulfide-isomerase	P4HB	1	0.0267537	55.37	DGVVLFK(1)K	2	0.066561	2	44779000	57772000	1.312
P07237	263	K	Protein disulfide-isomerase	P4HB	1	3.75526e-07	116.06	THILLFLPK(1)SVSDYDGK	2	-0.15633	4	42989000	52896000	1.325
P07237	200	K	Protein disulfide-isomerase	P4HB	1	1.16791e-05	118.87	YQLDK(1)DGVVLFK	2	0.54293	6	158130000	192910000	1.307
P07237	467	K	Protein disulfide-isomerase	P4HB	1	0.0159841	79.116	TLDGFK(1)K	2	-0.70303	19	1139300000	1408900000	1.283
P07237	375	K	Protein disulfide-isomerase	P4HB	1	1.32557e-15	168.67	VLVGK(1)NFEDVAFDEK	2	0.68509	4	55116000	67285000	1.226
P07237	366	K	Protein disulfide-isomerase	P4HB	0.999996	0.000523237	56.719	IKPHLMSQELPEDWDK(1)QPVK	3	0.9442	3	14124000	33790000	1.508
P07237	444	K	Protein disulfide-isomerase	P4HB	1	9.78871e-18	171.56	VHSFPTLK(1)FFPASADR	2	-1.3632	6	257240000	306620000	1.204
P07237	65	K	Protein disulfide-isomerase	P4HB	1	0.00143773	74.611	ALAPEYAK(1)AAGK	2	-0.15972	1	117460000	145670000	1.351
P07237	222	K	Protein disulfide-isomerase	P4HB	1	2.47077e-18	179.74	NNFEGEVTK(1)ENLLDFIK	2	0.063759	4	32326000	38157000	1.184
P07237	436	K	Protein disulfide-isomerase	P4HB	1	1.7971e-07	97.271	MDSTANEVEAVK(1)VHSFPTLK	3	0.12965	3	68446000	105430000	1.42
P07237	283	K	Protein disulfide-isomerase	P4HB	1	0.00565739	68.657	TAAESFK(1)GK	2	4.1142	1	9971200	5493300	0.237
P07237	326	K	Protein disulfide-isomerase	P4HB	0.96068	2.53815e-14	143.93	LITLEEEMTK(0.961)YK(0.039)PESEELTAER	3	-0.030916	2	35965000	80010000	1.41
P07237	114	K	Protein disulfide-isomerase	P4HB	1	3.1079e-15	167.03	NGDTASPK(1)EYTAGR	2	-0.25056	3	15199000	17250000	1.239
P07237	308	K	Protein disulfide-isomerase	P4HB	1	0.00161874	83.948	ILEFFGLK(1)K	2	1.9599	6	539080000	347120000	1.48
P07237	81	K	Protein disulfide-isomerase	P4HB	1	1.4197e-35	227	LAK(1)VDATEESDLAQQYGVR	2	-0.30453	5	51722000	60422000	1.215
P07237	103	K	Protein disulfide-isomerase	P4HB	1	0.00608148	67.897	GYPTIK(1)FFR	2	1.5677	4	43870000	59233000	1.312
P07237	409	K	Protein disulfide-isomerase	P4HB	1	5.37488e-09	141.54	QLAPIWDK(1)LGETYK	3	-2.1811	4	29686000	46487000	1.324
P07237	31	K	Protein disulfide-isomerase	P4HB	1	0.0147787	42.941	K(1)SNFAEALAAHK	3	-1.2905	1	9690100	10843000	1.241
P07237	415	K	Protein disulfide-isomerase	P4HB	1	1.06149e-07	123.28	LGETYK(1)DHENIVIAK	2	2.1471	3	25304000	29669000	1.323
P07237	247	K	Protein disulfide-isomerase	P4HB	1	6.5152e-06	73.11	HNQLPLVIEFTEQTAPK(1)IFGGEIK	3	1.2447	1	8512500	6695300	1.223
P07305	59	K	Histone H1.0	H1F0	1	1.96855e-07	123.92	SHYK(1)VGENADSQIK	2	0.84517	2	13203000	20666000	1.543
P07305	40	K	Histone H1.0	H1F0	1	5.13289e-11	144.55	YSDMIVAAIQAEK(1)NR	2	0.19275	5	22134000	41108000	1.668
P07305	82	K	Histone H1.0	H1F0	1	0.000447046	94.584	LVTTGVLK(1)QTK	2	-0.48715	2	13299000	24661000	1.951
P07339	127	K	Cathepsin D	CTSD	1	4.50257e-06	132.32	YNSDK(1)SSTYVK	2	-0.56176	2	110700000	54162000	0.504
P07339	253	K	Cathepsin D	CTSD	1	1.71225e-15	149.93	DPDAQPGGELMLGGTDSK(1)YYK	2	-1.053	4	53973000	28077000	0.69
P07339	122	K	Cathepsin D	CTSD	1	2.24228e-06	95.662	LLDIACWIHHK(1)YNSDK	3	-1.7313	2	20701000	9348200	0.421
P07355	152	K	Annexin A2	ANXA2	1	0.000909589	90.906	EMYK(1)TDLEK	2	0.14143	7	114890000	147380000	1.238
P07355	204	K	Annexin A2	ANXA2	1	0.000696242	99.442	DLYDAGVK(1)R	2	0.060065	38	3325700000	3940100000	1.243
P07355	206	K	Annexin A2	ANXA2	1	0.0226156	71.692	K(1)GTDVPK	2	-1.0067	1	9652400	10236000	1.133
P07355	227	K	Annexin A2	ANXA2	1	0.000261046	97.779	SVPHLQK(1)VFDR	3	-0.7894	6	428590000	595510000	1.119
P07355	119	K	Annexin A2	ANXA2	1	2.93399e-27	196.86	ASMK(1)GLGTDEDSLIEIICSR	2	0.47915	8	259060000	215620000	1.084
P07355	324	K	Annexin A2	ANXA2	1	1.91063e-31	220.21	SLYYYIQQDTK(1)GDYQK	3	0.30721	15	590770000	717610000	1.263
P07355	212	K	Annexin A2	ANXA2	1	0.000333969	71.241	GTDVPK(1)WISIMTER	2	-4.2892	3	31441000	28633000	1.275
P07355	157	K	Annexin A2	ANXA2	1	2.90812e-35	210.9	TDLEK(1)DIISDTSGDFRK	3	0.63991	61	3224500000	3217200000	1.097
P07355	329	K	Annexin A2	ANXA2	1	4.02365e-06	115.68	GDYQK(1)ALLYLCGGDD	2	-0.12014	2	42048000	46736000	1.179
P07355	233	K	Annexin A2	ANXA2	1	5.7078e-21	186.56	YK(1)SYSPYDMLESIR	2	-0.53652	22	544600000	667460000	1.172
P07355	28	K	Annexin A2	ANXA2	1	2.6058e-15	129.66	LSLEGDHSTPPSAYGSVK(1)AYTNFDAER	3	-1.1068	6	216120000	294760000	1.415
P07355	310	K	Annexin A2	ANXA2	0.833308	0.000383323	70.451	K(0.833)YGK(0.167)SLYYYIQQDTK	3	0.013	1	18181000	22710000	1.278
P07355	115	K	Annexin A2	ANXA2	1	8.21787e-35	240.5	TPAQYDASELK(1)ASMK	2	0.6858	12	116900000	156440000	1.339
P07355	279	K	Annexin A2	ANXA2	1	0.00570554	73.665	LYDSMK(1)GK	2	-0.22153	14	1216900000	1426800000	1.165
P07355	47	K	Annexin A2	ANXA2	1	1.56051e-08	128.68	DALNIETAIK(1)TK	2	0.67535	2	94265000	66018000	1.258
P07355	176	K	Annexin A2	ANXA2	1	0.000957816	91.318	LMVALAK(1)GR	2	1.7216	9	403860000	484170000	1.204
P07355	313	K	Annexin A2	ANXA2	1	9.52962e-11	146.84	YGK(1)SLYYYIQQDTK	2	2.9575	3	80459000	135230000	1.213
P07355	302	K	Annexin A2	ANXA2	1	8.58407e-06	154.49	SEVDMLK(1)IR	2	-0.24397	27	1345300000	1499400000	1.115
P07355	49	K	Annexin A2	ANXA2	1	6.12489e-13	158.17	TK(1)GVDEVTIVNILTNR	3	-0.12622	6	44259000	53099000	1.115
P07355	169	K	Annexin A2	ANXA2	1	0.00706839	84.498	K(1)LMVALAK	2	-1.7547	8	333000000	420040000	1.214
P07355	148	K	Annexin A2	ANXA2	1	0.00566367	107.43	VYK(1)EMYK	2	-0.11339	16	1058200000	1341300000	1.291
P07355	10	K	Annexin A2	ANXA2	1	1.14038e-34	198.99	STVHEILCK(1)LSLEGDHSTPPSAYGSVK	4	0.76048	6	163340000	205810000	1.353
P07384	631	K	Calpain-1 catalytic subunit	CAPN1	1	0.0170646	70.41	FDLDK(1)SGSMSAYEMR	2	-0.44089	1	0	4608400
P07437	324	K	Tubulin beta chain	TUBB	1	3.34597e-31	212.35	MSMK(1)EVDEQMLNVQNK	3	-1.1649	4	24641000	40115000	1.56
P07437	379	K	Tubulin beta chain	TUBB	1	4.5319e-06	100.58	MAVTFIGNSTAIQELFK(1)R	3	1.5401	1	0	22429000
P07437	58	K	Tubulin beta chain	TUBB	1	1.48214e-08	128.71	ISVYYNEATGGK(1)YVPR	2	0.81063	6	187280000	282110000	1.496
P07602	303	K	Prosaposin	PSAP	1	0.000149588	92.939	NVIPALELVEPIK(1)K	2	0.82937	2	13008000	23141000	1.977
P07602	438	K	Prosaposin	PSAP	1	1.90223e-15	156.08	QEILAALEK(1)GCSFLPDPYQK	3	-0.37668	2	20923000	19595000	0.957
P07686	217	K	Beta-hexosaminidase subunit beta	HEXB	1	0.000212477	111.46	HYLPVK(1)IILK	2	-0.47879	1	5391100	5085000	0.837
P07686	412	K	Beta-hexosaminidase subunit beta	HEXB	1	9.68177e-06	114.64	GSIVWQEVFDDK(1)AK	2	-0.44447	2	36827000	39426000	1.156
P07737	116	K	Profilin-1	PFN1	1	5.22869e-41	251.04	TLVLLMGK(1)EGVHGGLINK	3	-0.51937	7	76867000	132320000	1.345
P07737	91	K	Profilin-1	PFN1	1	5.08825e-06	97.095	TK(1)STGGAPTFNVTVTK	2	-0.46709	2	35442000	51551000	1.499
P07737	108	K	Profilin-1	PFN1	1	1.02497e-07	144.1	TDK(1)TLVLLMGK	3	-1.5449	16	355800000	546490000	1.465
P07737	105	K	Profilin-1	PFN1	1	1.32893e-05	92.264	STGGAPTFNVTVTK(1)TDK	2	-0.55367	1	6547600	6779500	1.055
P07737	54	K	Profilin-1	PFN1	1	2.27148e-18	164.2	TFVNITPAEVGVLVGK(1)DR	2	1.1198	10	55544000	124260000	1.222
P07737	126	K	Profilin-1	PFN1	1	2.04116e-10	173.64	EGVHGGLINK(1)K	2	-0.28459	4	148830000	204470000	1.407
P07741	51	K	Adenine phosphoribosyltransferase	APRT	1	0.0523861	43.308	HLK(1)ATHGGR	2	0.96382	1	622730	963420	1.369
P07814	512	K	Bifunctional glutamate/proline--tRNA ligase	EPRS	1	0.0447969	55.441	YVALLK(1)K	2	0.024459	2	55841000	76307000	1.271
P07814	435	K	Bifunctional glutamate/proline--tRNA ligase	EPRS	1	6.37856e-07	141.08	LNLNNTVLSK(1)R	2	0.39969	2	47883000	61757000	1.345
P07814	1375	K	Bifunctional glutamate/proline--tRNA ligase	EPRS	1	0.00509751	68.355	DMK(1)SCQFVAVR	2	0.69254	1	7533500	5320800	1.087
P07814	586	K	Bifunctional glutamate/proline--tRNA ligase	EPRS	1	0.000179075	98.253	NADGK(1)IISLDAK	2	-0.57895	1	6000800	5928600	1.038
P07814	861	K	Bifunctional glutamate/proline--tRNA ligase	EPRS	1	1.25845e-05	78.326	INEAVECLLSLK(1)AQYK	3	-0.99496	1	5538400	6956000	1.492
P07814	1009	K	Bifunctional glutamate/proline--tRNA ligase	EPRS	1	1.26899e-19	170.79	NQGGGLSSSGAGEGQGPK(1)K	3	0.312	3	5285900	5977100	1.214
P07814	907	K	Bifunctional glutamate/proline--tRNA ligase	EPRS	1	7.36559e-11	150.78	VLFDK(1)VASQGEVVR	2	0.72506	2	23796000	27241000	1.177
P07814	1091	K	Bifunctional glutamate/proline--tRNA ligase	EPRS	1	0.000551492	63.46	EK(1)THVADFAPEVAWVTR	3	-0.20609	1	4222900	5764400	1.038
P07814	148	K	Bifunctional glutamate/proline--tRNA ligase	EPRS	1	0.0447969	55.441	APVHVK(1)R	2	0.46312	2	5460500	6236900	1.171
P07814	513	K	Bifunctional glutamate/proline--tRNA ligase	EPRS	1	0.00414364	53.565	K(1)EVIPVNVPEAQEEMK	2	0.26988	1	3965900	6963700	1.753
P07814	963	K	Bifunctional glutamate/proline--tRNA ligase	EPRS	0.919265	2.59569e-06	88.983	SLIGVEYKPVSATGAEDK(0.081)DK(0.919)K	3	0.31998	1	3756000	6246400	1.848
P07858	237	K	Cathepsin B	CTSB	1	4.21607e-18	142.85	HYGYNSYSVSNSEK(1)DIMAEIYK	3	-0.60195	2	186220000	64718000	0.338
P07858	220	K	Cathepsin B	CTSB	1	4.9152e-05	97.203	ICEPGYSPTYK(1)QDK	2	0.11542	2	12789000	5864300	0.403
P07858	223	K	Cathepsin B	CTSB	1	1.25309e-05	76.373	QDK(1)HYGYNSYSVSNSEK	3	0.91091	1	23665000	7555900	0.315
P07900	546	K	Heat shock protein HSP 90-alpha	HSP90AA1	1	6.47348e-28	207.16	TLVSVTK(1)EGLELPEDEEEK	2	0.5521	4	32792000	56430000	2.112
P07900	489	K	Heat shock protein HSP 90-alpha	HSP90AA1	1	1.86217e-34	239.87	ENQK(1)HIYYITGETK	2	0.63276	3	43131000	90246000	2.235
P07900	632	K	Heat shock protein HSP 90-alpha	HSP90AA1	1	3.36456e-25	205.95	K(1)HLEINPDHSIIETLR	3	-0.65554	6	98936000	190400000	1.886
P07900	585	K	Heat shock protein HSP 90-alpha	HSP90AA1	1	0.00227898	104.3	VEK(1)VVVSNR	2	-0.65465	7	184990000	268940000	2.003
P07900	407	K	Heat shock protein HSP 90-alpha	HSP90AA1	1	9.05873e-05	119.68	EMLQQSK(1)ILK	2	0.37515	3	50827000	84609000	1.651
P07900	567	K	Heat shock protein HSP 90-alpha	HSP90AA1	0.894867	0.00344146	107.11	K(0.105)TK(0.895)FENLCK	2	1.1514	2	3697800	6727200	1.667
P07900	419	K	Heat shock protein HSP 90-alpha	HSP90AA1	1	4.67904e-32	214.63	K(1)CLELFTELAEDKENYK	3	0.49029	3	46659000	122880000	2.098
P07900	292	K	Heat shock protein HSP 90-alpha	HSP90AA1	1	3.38013e-09	141.08	YIDQEELNK(1)TK	2	1.8664	7	160100000	245630000	1.765
P07900	576	K	Heat shock protein HSP 90-alpha	HSP90AA1	1	0.00495212	91.867	IMK(1)DILEK	2	-0.89401	2	35250000	59278000	1.716
P07900	74	K	Heat shock protein HSP 90-alpha	HSP90AA1	1	1.26461e-11	159.34	LDSGK(1)ELHINLIPNK	3	1.2372	14	261000000	525380000	2.074
P07900	615	K	Heat shock protein HSP 90-alpha	HSP90AA1	1	0.00533167	89.142	IMK(1)AQALR	2	0.38954	3	75811000	132370000	1.676
P07900	84	K	Heat shock protein HSP 90-alpha	HSP90AA1	1	1.61052e-06	121.24	ELHINLIPNK(1)QDR	2	-0.46768	2	24815000	56971000	2.522
P07900	436	K	Heat shock protein HSP 90-alpha	HSP90AA1	1	0.0581205	46.001	K(1)FYEQFSK	2	-0.4421	1	19432000	27025000	1.759
P07900	631	K	Heat shock protein HSP 90-alpha	HSP90AA1	1	9.67129e-05	110.08	DNSTMGYMAAK(1)K	2	0.56978	13	156190000	291180000	1.944
P07900	283	K	Heat shock protein HSP 90-alpha	HSP90AA1	1	9.5428e-31	245.93	EK(1)YIDQEELNK	2	-1.1403	14	358770000	605660000	1.694
P07900	185	K	Heat shock protein HSP 90-alpha	HSP90AA1	1	0.00246498	74.376	GTK(1)VILHLK	2	-0.35844	3	92258000	157500000	1.644
P07900	458	K	Heat shock protein HSP 90-alpha	HSP90AA1	1	0.00670225	107.59	K(1)LSELLR	2	-0.29494	2	69570000	130340000	1.784
P07900	58	K	Heat shock protein HSP 90-alpha	HSP90AA1	1	3.94853e-16	183.89	ELISNSSDALDK(1)IR	2	0.29228	12	229170000	428040000	1.797
P07900	69	K	Heat shock protein HSP 90-alpha	HSP90AA1	1	1.23508e-15	178.67	YESLTDPSK(1)LDSGK	2	0.84826	17	608160000	1005200000	1.717
P07900	112	K	Heat shock protein HSP 90-alpha	HSP90AA1	1	1.91079e-12	147.64	ADLINNLGTIAK(1)SGTK	2	0.61578	1	5192600	7087000	1.577
P07900	362	K	Heat shock protein HSP 90-alpha	HSP90AA1	1	1.75912e-07	165.11	NNIK(1)LYVR	2	0.38334	2	61397000	96675000	1.784
P07900	209	K	Heat shock protein HSP 90-alpha	HSP90AA1	1	7.19307e-05	74.147	K(1)HSQFIGYPITLFVEK	3	0.76483	1	10939000	24791000	2.119
P07900	191	K	Heat shock protein HSP 90-alpha	HSP90AA1	1	1.34427e-48	272.16	VILHLK(1)EDQTEYLEER	2	-0.44984	10	456200000	810150000	1.678
P07900	657	K	Heat shock protein HSP 90-alpha	HSP90AA1	0.999832	5.34362e-05	127.56	AEADKNDK(1)SVK	2	1.876	1	0	3624400
P07900	499	K	Heat shock protein HSP 90-alpha	HSP90AA1	1	9.88567e-37	225.5	HIYYITGETK(1)DQVANSAFVER	2	0.4967	4	158630000	290210000	1.836
P07900	539	K	Heat shock protein HSP 90-alpha	HSP90AA1	1	0.000618616	86.772	EFEGK(1)TLVSVTK	2	0.40255	4	112930000	235690000	2.194
P07900	224	K	Heat shock protein HSP 90-alpha	HSP90AA1	1	1.82839e-18	168.42	HSQFIGYPITLFVEK(1)ER	3	0.15602	5	86696000	164220000	1.691
P07900	478	K	Heat shock protein HSP 90-alpha	HSP90AA1	1	3.55703e-35	221.47	YYTSASGDEMVSLK(1)DYCTR	2	0.74462	7	66684000	104090000	2.079
P07910	170	K	Heterogeneous nuclear ribonucleoproteins C1/C2	HNRNPC	1	0.00477428	93.143	GK(1)SGFNSK	2	-0.39327	2	5069600	5590200	1.118
P07910	197	K	Heterogeneous nuclear ribonucleoproteins C1/C2	HNRNPC	1	1.57802e-05	137.4	LKGDDLQAIK(1)K	2	0.18654	8	1074400000	1400600000	1.308
P07910	189	K	Heterogeneous nuclear ribonucleoproteins C1/C2	HNRNPC	1	0.0106143	60.064	LK(1)GDDLQAIK	2	1.6473	3	52635000	64898000	1.253
P07910	50	K	Heterogeneous nuclear ribonucleoproteins C1/C2	HNRNPC	1	2.87704e-11	124.2	IVGCSVHK(1)GFAFVQYVNER	3	0.34138	4	54409000	63354000	1.157
P07910	39	K	Heterogeneous nuclear ribonucleoproteins C1/C2	HNRNPC	1	3.52306e-06	120.57	SDVEAIFSK(1)YGK	2	-0.41527	4	99342000	117900000	1.093
P07910	206	K	Heterogeneous nuclear ribonucleoproteins C1/C2	HNRNPC	1	9.05115e-05	109.16	QK(1)VDSLLENLEK	2	1.0308	1	11487000	12890000	1.06
P07910	198	K	Heterogeneous nuclear ribonucleoproteins C1/C2	HNRNPC	1	0.00286803	127.12	K(1)ELTQIK	2	-0.61015	2	47100000	57940000	1.151
P07910	176	K	Heterogeneous nuclear ribonucleoproteins C1/C2	HNRNPC	1	0.0139233	54.343	SGFNSK(1)SGQR	2	-1.8794	1	2854100	2414300	1.086
P07910	8	K	Heterogeneous nuclear ribonucleoproteins C1/C2	HNRNPC	1	0.00055189	97.163	ASNVTNK(1)TDPR	2	0.81339	1	0	16934000
P07910	219	K	Heterogeneous nuclear ribonucleoproteins C1/C2	HNRNPC	1	0.00538652	109.01	IEK(1)EQSK	2	-0.39945	2	1313100	1803700	1.134
P07910	216	K	Heterogeneous nuclear ribonucleoproteins C1/C2	HNRNPC	1	1.85712e-13	164.93	VDSLLENLEK(1)IEK	2	1.0608	5	85349000	97178000	1.251
P07910	30	K	Heterogeneous nuclear ribonucleoproteins C1/C2	HNRNPC	1	0.000283285	109.72	K(1)SDVEAIFSK	2	-0.034429	2	58140000	76197000	1.245
P07910	157	K	Heterogeneous nuclear ribonucleoproteins C1/C2	HNRNPC	1	0.0142358	83.614	AVVPSK(1)R	2	-0.57949	3	741200000	847030000	1.181
P07910	29	K	Heterogeneous nuclear ribonucleoproteins C1/C2	HNRNPC	1	3.31411e-11	162.68	VFIGNLNTLVVK(1)K	3	-1.3002	5	572550000	652720000	1.119
P07910	223	K	Heterogeneous nuclear ribonucleoproteins C1/C2	HNRNPC	1	0.000768069	91.469	EQSK(1)QAVEMK	2	0.08762	2	6794400	9845800	1.499
P07942	1659	K	Laminin subunit beta-1	LAMB1	1	0.0142358	83.614	NVEELK(1)R	2	-2.1126	1	23577000	26239000	1.347
P07942	482	K	Laminin subunit beta-1	LAMB1	1	1.46536e-08	86.039	SCACNPLGTIPGGNPCDSETGHCYCK(1)R	3	-0.22192	2	6628900	5559000	1.044
P07942	1697	K	Laminin subunit beta-1	LAMB1	1	0.0061713	66.267	TLDGELDEK(1)YK	2	1.8403	1	7885800	7112700	0.873
P07951	213	K	Tropomyosin beta chain	TPM2	1	0.000940463	105.65	SLEAQADK(1)YSTK	2	-2.1952	1	0	1537600
P07954	221	K	Fumarate hydratase, mitochondrial	FH	1	0.000211865	111.5	LHDALDAK(1)SK	3	0.96319	9	67191000	103530000	1.584
P07954	66	K	Fumarate hydratase, mitochondrial	FH	1	0.00366521	67.102	VPNDK(1)YYGAQTVR	2	-2.5646	1	6302300	16295000	2.163
P07954	223	K	Fumarate hydratase, mitochondrial	FH	1	0.0501385	68.456	SK(1)EFAQIIK	2	-0.020176	1	0	13201000
P08133	620	K	Annexin A6	ANXA6	1	0.000191902	105.46	GAGTDEK(1)TLTR	2	1.4506	2	14086000	20337000	1.373
P08133	102	K	Annexin A6	ANXA6	1	3.85842e-05	98.676	EIK(1)DAISGIGTDEK	2	-0.13121	1	5550700	4057600	0.855
P08133	9	K	Annexin A6	ANXA6	1	0.0237166	53.754	PAQGAK(1)YR	2	0.51859	1	2981900	3225500	1.318
P08133	607	K	Annexin A6	ANXA6	1	0.00258191	80.014	NKPLFFADK(1)LYK	3	-1.4368	2	7561100	25752000	1.431
P08133	579	K	Annexin A6	ANXA6	1	6.63312e-29	207.97	MTNYDVEHTIK(1)K	2	1.3047	4	21885000	39452000	1.399
P08134	162	K	Rho-related GTP-binding protein RhoC	RHOC	1	2.45584e-05	106.42	ISAFGYLECSAK(1)TK	2	1.991	1	12876000	6995800	0.64
P08134	118	K	Rho-related GTP-binding protein RhoC	RHOC	1	2.07897e-21	194.06	HFCPNVPIILVGNK(1)K	2	3.455	4	278900000	415800000	1.514
P08174	76	K	Complement decay-accelerating factor	CD55	1	0.00106293	103.11	IPGEK(1)DSVICLK	2	0.24022	1	0	29411000
P08195	166	K	4F2 cell-surface antigen heavy chain	SLC3A2	1	0.000220273	103.21	FTGLSK(1)EELLK	2	1.1625	2	78616000	71290000	1.067
P08195	298	K	4F2 cell-surface antigen heavy chain	SLC3A2	1	1.10895e-13	181.66	EDFDSLLQSAK(1)K	2	-0.7674	6	282380000	272280000	1.009
P08195	255	K	4F2 cell-surface antigen heavy chain	SLC3A2	1	0.00127957	82.417	LDYLSSLK(1)VK	2	0.28606	1	38037000	35354000	0.951
P08195	266	K	4F2 cell-surface antigen heavy chain	SLC3A2	1	0.00292128	70.942	GLVLGPIHK(1)NQK	2	-1.49	2	17777000	15943000	0.932
P08238	204	K	Heat shock protein HSP 90-beta	HSP90AB1	1	0.00202247	60.542	K(1)HSQFIGYPITLYLEK	3	1.795	1	0	5543400
P08238	53	K	Heat shock protein HSP 90-beta	HSP90AB1	1	1.35808e-21	203.29	ELISNASDALDK(1)IR	2	1.2049	16	711980000	877800000	1.301
P08238	577	K	Heat shock protein HSP 90-beta	HSP90AB1	1	0.000149204	121.73	VEK(1)VTISNR	2	1.6802	8	105900000	141510000	1.221
P08238	565	K	Heat shock protein HSP 90-beta	HSP90AB1	1	0.000364098	115.71	FENLCK(1)LMK	2	-0.73663	2	32078000	64588000	2.73
P08238	347	K	Heat shock protein HSP 90-beta	HSP90AB1	1	8.46977e-14	197.27	APFDLFENK(1)K	2	-1.7353	9	309030000	391620000	1.317
P08238	531	K	Heat shock protein HSP 90-beta	HSP90AB1	1	9.43584e-05	108.68	EFDGK(1)SLVSVTK	2	-0.61132	5	436510000	587840000	1.357
P08238	438	K	Heat shock protein HSP 90-beta	HSP90AB1	1	1.03151e-09	151.66	NLK(1)LGIHEDSTNR	2	0.5997	5	59310000	86932000	1.201
P08238	435	K	Heat shock protein HSP 90-beta	HSP90AB1	1	0.0474291	66.664	FYEAFSK(1)NLK	2	-1.5347	1	0	4715300
P08238	491	K	Heat shock protein HSP 90-beta	HSP90AB1	1	4.97357e-28	194.92	SIYYITGESK(1)EQVANSAFVER	2	0.672	3	26485000	34576000	1.241
P08238	69	K	Heat shock protein HSP 90-beta	HSP90AB1	1	0.00574084	86.205	LDSGK(1)ELK	2	-0.41622	4	295940000	391680000	1.387
P08238	568	K	Heat shock protein HSP 90-beta	HSP90AB1	1	0.000907879	133.23	LMK(1)EILDK	2	-0.31462	1	65276000	83474000	1.29
P08238	481	K	Heat shock protein HSP 90-beta	HSP90AB1	1	6.47314e-07	119.63	ETQK(1)SIYYITGESK	2	-0.23267	2	44188000	57286000	1.352
P08238	623	K	Heat shock protein HSP 90-beta	HSP90AB1	1	0.000818403	81.676	DNSTMGYMMAK(1)K	2	-1.1633	5	18679000	23513000	1.219
P08238	72	K	Heat shock protein HSP 90-beta	HSP90AB1	1	2.96659e-06	126.1	ELK(1)IDIIPNPQER	2	2.0163	1	0	9629600
P08238	411	K	Heat shock protein HSP 90-beta	HSP90AB1	1	1.08629e-09	135.95	K(1)CLELFSELAEDKENYK	3	-0.92749	4	41200000	50026000	1.335
P08238	624	K	Heat shock protein HSP 90-beta	HSP90AB1	1	4.3885e-09	127.32	K(1)HLEINPDHPIVETLR	3	-0.82217	6	54448000	136250000	1.322
P08240	492	K	Signal recognition particle receptor subunit alpha	SRPR	1	0.000929643	78.964	TMVQLFEK(1)GYGK	2	0.73953	1	9335900	10046000	1.309
P08240	344	K	Signal recognition particle receptor subunit alpha	SRPR	1	0.00214779	74.094	EDMESVLDK(1)MR	2	-1.8322	1	13749000	16846000	1.236
P08243	467	K	Asparagine synthetase [glutamine-hydrolyzing]	ASNS	1	0.00718991	87.914	PK(1)EAFSDGITSVK	2	3.032	1	0	4963500
P08243	244	K	Asparagine synthetase [glutamine-hydrolyzing]	ASNS	1	0.00113924	91.318	ILFNNAVK(1)K	2	0.098049	2	24193000	33723000	1.574
P08559	244	K	Pyruvate dehydrogenase E1 component subunit alpha, somatic form, mitochondrial	PDHA1	1	4.62611e-06	147.2	AAASTDYYK(1)R	2	-1.003	3	24944000	43157000	1.008
P08559	321	K	Pyruvate dehydrogenase E1 component subunit alpha, somatic form, mitochondrial	PDHA1	1	0.000415815	97.734	SDPIMLLK(1)DR	2	-1.1796	2	48758000	48358000	1.335
P08574	170	K	Cytochrome c1, heme protein, mitochondrial	CYC1	1	0.00165234	75.819	PGK(1)LFDYFPK	2	0.26018	1	8967500	11617000	1.259
P08574	310	K	Cytochrome c1, heme protein, mitochondrial	CYC1	1	0.00945133	91.318	HK(1)WSVLK	2	-0.10983	2	18901000	17176000	0.935
P08621	27	K	U1 small nuclear ribonucleoprotein 70 kDa	SNRNP70	1	1.26329e-05	78.244	DPIPYLPPLEK(1)LPHEK	3	0.67773	1	11585000	18734000	1.265
P08621	130	K	U1 small nuclear ribonucleoprotein 70 kDa	SNRNP70	1	7.70155e-05	126.07	EFEVYGPIK(1)R	2	-0.53903	2	134430000	150100000	1.064
P08670	104	K	Vimentin	VIM	1	3.52467e-31	234.58	TNEK(1)VELQELNDR	2	-0.80958	11	326490000	377410000	1.047
P08670	373	K	Vimentin	VIM	1	6.41763e-17	185.95	LQDEIQNMK(1)EEMAR	2	-0.56454	16	354430000	442300000	1.22
P08670	282	K	Vimentin	VIM	1	9.0394e-12	136.43	QQYESVAAK(1)NLQEAEEWYK	3	0.65157	1	13916000	17347000	1.232
P08670	139	K	Vimentin	VIM	1	7.67596e-11	150.22	ILLAELEQLK(1)GQGK(1)SR	3	-1.5757	6	177100000	201110000	1.086
P08670	129	K	Vimentin	VIM	1	7.35305e-09	130.27	FLEQQNK(1)ILLAELEQLK	2	-0.046108	4	25394000	27958000	1.145
P08670	188	K	Vimentin	VIM	1	0.000556468	90.149	EK(1)LQEEMLQR	2	-0.13645	2	16375000	18842000	1.321
P08670	143	K	Vimentin	VIM	1	1.41231e-08	126.77	ILLAELEQLK(1)GQGK(1)SR	3	-1.5757	1	0	7612500
P08670	445	K	Vimentin	VIM	1	0.000287396	106.4	TLLIK(1)TVETR	2	0.51933	7	400480000	492550000	1.12
P08670	294	K	Vimentin	VIM	1	9.29947e-07	136.38	SK(1)FADLSEAANR	2	-1.9723	14	527540000	593170000	1.174
P08670	292	K	Vimentin	VIM	1	2.89897e-06	124.38	NLQEAEEWYK(1)SK	2	0.023142	5	298100000	363690000	1.214
P08670	235	K	Vimentin	VIM	1	7.52417e-43	264.31	VESLQEEIAFLK(1)K	3	0.18	27	2441800000	3635200000	1.218
P08670	334	K	Vimentin	VIM	1	2.33594e-55	267.92	QVQSLTCEVDALK(1)GTNESLER	2	0.02146	8	292710000	288390000	1.098
P08670	120	K	Vimentin	VIM	1	0.000227012	126.07	FANYIDK(1)VR	2	-0.29391	25	3398900000	3588700000	1.199
P08670	97	K	Vimentin	VIM	1	2.16673e-19	168.64	LLQDSVDFSLADAINTEFK(1)NTR	3	0.23084	1	0	12961000
P08670	168	K	Vimentin	VIM	1	3.78063e-21	217.14	QVDQLTNDK(1)AR	2	0.56864	25	1596500000	1764000000	1.138
P08670	313	K	Vimentin	VIM	1	0.000287396	106.4	QAK(1)QESTEYR	2	0.51659	1	7119200	8567100	1.172
P08670	439	K	Vimentin	VIM	1	2.35272e-18	183.36	ETNLDSLPLVDTHSK(1)R	2	-0.35723	30	1518000000	1808800000	1.213
P08670	223	K	Vimentin	VIM	1	1.37902e-09	150.11	K(1)VESLQEEIAFLK	2	-0.64298	5	376620000	428370000	1.236
P08754	67	K	Guanine nucleotide-binding protein G(k) subunit alpha	GNAI3	1	0.000575235	62.357	IIHEDGYSEDECK(1)QYK	3	-0.14514	1	5658500	5963400	1.308
P08758	310	K	Annexin A5	ANXA5	1	0.0140134	55.353	K(1)ALLLLCGEDD	2	0.34555	2	22182000	30274000	1.622
P08758	70	K	Annexin A5	ANXA5	1	1.05666e-05	117.94	DLLDDLK(1)SELTGK	2	0.86001	3	29559000	41999000	1.473
P08758	97	K	Annexin A5	ANXA5	1	0.00426602	76.073	LYDAYELK(1)HALK	2	1.0426	1	0	0
P08758	101	K	Annexin A5	ANXA5	1	0.000274711	98.902	HALK(1)GAGTNEK	2	0.44222	1	1921000	2531200	1.373
P08758	58	K	Annexin A5	ANXA5	1	6.67321e-10	156.08	QEISAAFK(1)TLFGR	2	0.76862	3	5957100	22839000	1.56
P08758	290	K	Annexin A5	ANXA5	1	0.00360058	70.68	K(1)NFATSLYSMIK	2	0.041861	1	8487700	4120400	1.31
P08865	52	K	40S ribosomal protein SA	RPSA	1	4.89158e-08	156.16	SDGIYIINLK(1)R	2	-0.069619	5	270290000	326830000	1.279
P08865	42	K	40S ribosomal protein SA	RPSA	1	9.15495e-07	112.7	K(1)SDGIYIINLK	2	0.69143	2	0	0
P08865	57	K	40S ribosomal protein SA	RPSA	1	3.28627e-05	134.59	TWEK(1)LLLAAR	2	-1.2626	5	65520000	90886000	1.307
P08865	40	K	40S ribosomal protein SA	RPSA	1	7.21548e-31	196.76	FLAAGTHLGGTNLDFQMEQYIYK(1)R	3	0.17264	2	9323500	10875000	1.422
P08865	220	K	40S ribosomal protein SA	RPSA	1	2.38046e-20	174.2	DPEEIEKEEQAAAEK(1)AVTK	3	-0.17816	3	58647000	75952000	1.281
P08962	188	K	CD63 antigen	CD63	1	3.64238e-06	148.28	AIHK(1)EGCVEK	3	-0.37601	4	40086000	44413000	1.062
P08962	110	K	CD63 antigen	CD63	1	9.43584e-05	108.68	DK(1)VMSEFNNNFR	2	-0.28271	4	42234000	47295000	1.271
P09012	98	K	U1 small nuclear ribonucleoprotein A	SNRPA	1	0.0177159	61.679	MK(1)GTFVER	2	0.82909	1	18508000	20884000	1.337
P09012	80	K	U1 small nuclear ribonucleoprotein A	SNRPA	1	0.00029512	116.51	SMQGFPFYDK(1)PMR	2	0.049471	1	0	27040000
P09012	20	K	U1 small nuclear ribonucleoprotein A	SNRPA	1	2.74208e-10	141.85	PNHTIYINNLNEK(1)IK	3	1.1083	1	12480000	17399000	0.985
P09132	26	K	Signal recognition particle 19 kDa protein	SRP19	1	0.000668758	81.525	FICIYPAYLNNK(1)K	2	0.42842	1	9659900	10229000	1.111
P09382	64	K	Galectin-1	LGALS1	1	6.98e-21	154.7	FNAHGDANTIVCNSK(1)DGGAWGTEQR	3	0.072226	4	50721000	83507000	1.739
P09382	37	K	Galectin-1	LGALS1	1	1.16095e-35	209.7	SFVLNLGK(1)DSNNLCLHFNPR	3	-0.80432	1	58836000	82588000	1.576
P09382	108	K	Galectin-1	LGALS1	1	0.00887035	86.838	LPDGYEFK(1)FPNR	2	-0.84235	1	0	7347500
P09382	29	K	Galectin-1	LGALS1	1	3.31803e-06	100.43	GEVAPDAK(1)SFVLNLGK	3	-0.68948	5	273660000	512280000	1.917
P09429	172	K	High mobility group protein B1	HMGB1	0.999999	0.0482705	58.981	GKPDAAK(1)K	2	-0.36843	1	9096000	16266000	1.769
P09429	127	K	High mobility group protein B1	HMGB1	1	1.50013e-07	145.49	GEHPGLSIGDVAK(1)K	2	0.47029	3	66273000	96095000	1.525
P09429	43	K	High mobility group protein B1	HMGB1	1	0.000673104	65.811	HPDASVNFSEFSK(1)K	3	-1.1618	3	84204000	119450000	1.502
P09429	157	K	High mobility group protein B1	HMGB1	1	0.00117989	95.498	YEK(1)DIAAYR	2	-0.040785	5	105210000	153940000	1.543
P09429	65	K	High mobility group protein B1	HMGB1	1	0.00988941	76.073	FEDMAK(1)ADK	2	-1.8607	2	9651200	13565000	1.408
P09493	231	K	Tropomyosin alpha-1 chain	TPM1	1	0.0531	50.127	VLSDK(1)LK	2	0.79341	1	13149000	11908000	0.93
P09493	233	K	Tropomyosin alpha-1 chain	TPM1	1	0.010917	86.833	LK(1)EAETR	2	0.50435	2	11580000	21274000	1.999
P09496	136	K	Clathrin light chain A	CLTA	1	0.0038508	183	KQEAEWK(1)EK	2	1.0343	3	9182600	24428000	1.463
P09496	141	K	Clathrin light chain A	CLTA	1	0.0461705	48.513	AIK(1)ELEEWYAR	2	0.87449	1	0	0
P09496	242	K	Clathrin light chain A	CLTA	1	8.92514e-05	103.91	SVLISLK(1)QAPLVH	2	-1.3173	2	8750600	29047000	1.355
P09525	246	K	Annexin A4	ANXA4	1	0.00911301	62.466	NK(1)SAYFAEK	2	0.017326	1	26037000	16351000	0.621
P09525	57	K	Annexin A4	ANXA4	1	0.00565739	68.657	TAYK(1)STIGR	2	0.58567	1	6119800	3891600	0.623
P09525	259	K	Annexin A4	ANXA4	1	3.83761e-11	157.2	SMK(1)GLGTDDNTLIR	2	0.16368	2	42344000	24595000	0.56
P09525	253	K	Annexin A4	ANXA4	1	0.000758616	91.636	SAYFAEK(1)LYK	2	-0.80771	5	167540000	98520000	0.628
P09525	213	K	Annexin A4	ANXA4	1	2.76437e-40	262.15	NHLLHVFDEYK(1)R	3	-0.75723	22	1125400000	717370000	0.624
P09525	218	K	Annexin A4	ANXA4	1	2.59779e-06	136.53	ISQK(1)DIEQSIK	2	1.9435	1	10731000	4439700	0.467
P09525	184	K	Annexin A4	ANXA4	1	1.24045e-23	219.35	QDAQDLYEAGEK(1)K	2	-0.55072	2	42895000	27675000	0.623
P09525	300	K	Annexin A4	ANXA4	1	9.85428e-08	124.62	SLYSFIK(1)GDTSGDYR	2	-0.57028	1	10890000	6308000	0.662
P09543	73	K	2',3'-cyclic-nucleotide 3'-phosphodiesterase	CNP	1	0.022201	68.915	VIVDK(1)YR	2	-0.17482	1	10136000	10676000	1.202
P09543	175	K	2',3'-cyclic-nucleotide 3'-phosphodiesterase	CNP	1	0.000588197	105.65	NQWQLSADDLK(1)K	2	-1.4826	1	0	11443000
P09543	275	K	2',3'-cyclic-nucleotide 3'-phosphodiesterase	CNP	1	8.71951e-26	188.59	APGAEEYAQQDVLK(1)K	2	0.47881	1	0	0
P09543	235	K	2',3'-cyclic-nucleotide 3'-phosphodiesterase	CNP	1	0.00188185	74.611	EK(1)MDLVTYFGK	2	-0.57732	2	6657700	7150700	1.065
P09601	148	K	Heme oxygenase 1	HMOX1	1	9.54767e-05	102.87	YLGDLSGGQVLK(1)K	2	0.62606	2	49935000	22886000	0.51
P09622	440	K	Dihydrolipoyl dehydrogenase, mitochondrial	DLD	1	6.33293e-05	119.45	TNADTDGMVK(1)ILGQK	2	-2.4844	1	0	22011000
P09622	283	K	Dihydrolipoyl dehydrogenase, mitochondrial	DLD	1	0.0276811	67.981	VTGATK(1)K	2	-0.026624	2	7187400	7466300	1.019
P09622	72	K	Dihydrolipoyl dehydrogenase, mitochondrial	DLD	1	0.000102623	57.802	TVCIEK(1)NETLGGTCLNVGCIPSK	3	0.42754	1	4107900	5085200	1.471
P09622	66	K	Dihydrolipoyl dehydrogenase, mitochondrial	DLD	1	0.000188296	89.231	AAQLGFK(1)TVCIEK	2	0.61344	1	0	0
P09622	122	K	Dihydrolipoyl dehydrogenase, mitochondrial	DLD	1	0.000866265	89.731	LNLDK(1)MMEQK	2	-0.66147	2	46755000	52318000	1.202
P09622	267	K	Dihydrolipoyl dehydrogenase, mitochondrial	DLD	1	0.00698391	77.282	ILQK(1)QGFK	2	0.84059	1	13888000	15482000	0.861
P09651	350	K	Heterogeneous nuclear ribonucleoprotein A1	HNRNPA1	1	1.90679e-05	90.707	SSGPYGGGGQYFAK(1)PR	2	0.63057	1	10180000	15348000	1.476
P09651	161	K	Heterogeneous nuclear ribonucleoprotein A1	HNRNPA1	1	1.57159e-11	123.55	GFAFVTFDDHDSVDK(1)IVIQK	3	0.7937	3	29438000	26871000	1.113
P09651	3	K	Heterogeneous nuclear ribonucleoprotein A1	HNRNPA1	1	9.26075e-05	106.33	SK(1)SESPKEPEQLR	2	1.0366	1	2321200	3058200	1.157
P09651	78	K	Heterogeneous nuclear ribonucleoprotein A1	HNRNPA1	1	0.026411	65.246	PHK(1)VDGR	2	0.17495	4	16479000	16117000	0.947
P09651	15	K	Heterogeneous nuclear ribonucleoprotein A1	HNRNPA1	1	7.22293e-18	170.11	K(1)LFIGGLSFETTDESLR	2	0.080907	2	15237000	15125000	1.03
P09651	8	K	Heterogeneous nuclear ribonucleoprotein A1	HNRNPA1	1	8.41943e-06	123.67	SESPK(1)EPEQLR	2	-0.39722	2	8891000	9468300	1.189
P09651	166	K	Heterogeneous nuclear ribonucleoprotein A1	HNRNPA1	1	0.000330605	68.41	IVIQK(1)YHTVNGHNCEVR	3	0.34489	1	5348000	6081200	1.122
P09651	105	K	Heterogeneous nuclear ribonucleoprotein A1	HNRNPA1	1	1.53626e-07	134.26	PGAHLTVK(1)K	2	0.011313	17	778560000	919810000	1.162
P09661	128	K	U2 small nuclear ribonucleoprotein A'	SNRPA1	1	0.0099417	94.662	NPVTNK(1)K	2	-0.25069	2	10762000	10804000	1.002
P09661	191	K	U2 small nuclear ribonucleoprotein A'	SNRPA1	1	0.00043165	88.561	TFNPGAGLPTDK(1)K	2	-0.36633	3	7286000	33572000	1.219
P09661	67	K	U2 small nuclear ribonucleoprotein A'	SNRPA1	1	0.00206673	74.841	LK(1)TLLVNNNR	2	-0.61521	1	7068500	8936000	1.481
P09661	172	K	U2 small nuclear ribonucleoprotein A'	SNRPA1	1	0.0360265	48.284	GAQLAK(1)DIAR	2	1.2551	1	6103100	5519700	1.003
P09661	56	K	U2 small nuclear ribonucleoprotein A'	SNRPA1	1	0.000660588	101.65	K(1)LDGFPLLR	2	0.22754	1	4552900	4014000	0.952
P09669	60	K	Cytochrome c oxidase subunit 6C	COX6C	1	4.04306e-13	166.04	NYDVMK(1)DFEEMR	2	-0.77193	2	35494000	31152000	0.97
P09669	67	K	Cytochrome c oxidase subunit 6C	COX6C	1	0.0167276	53.597	K(1)AGIFQSVK	2	-0.43592	1	11370000	9510300	0.916
P09669	47	K	Cytochrome c oxidase subunit 6C	COX6C	1	0.0502604	47.96	K(1)AYADFYR	2	0.0073842	1	9859000	10625000	1.21
P09874	564	K	Poly [ADP-ribose] polymerase 1	PARP1	1	0.000302656	64.26	VFSATLGLVDIVK(1)GTNSYYK	3	-0.39212	1	6460300	6555400	1.427
P09874	192	K	Poly [ADP-ribose] polymerase 1	PARP1	1	0.000285342	97.223	GFSLLATEDK(1)EALK	2	-2.0728	2	8243000	19646000	1.631
P09874	7	K	Poly [ADP-ribose] polymerase 1	PARP1	1	0.028573	111.46	AESSDK(1)LYR	2	-0.56401	1	8357300	7752600	0.967
P09874	607	K	Poly [ADP-ribose] polymerase 1	PARP1	1	0.000781024	57.525	LEQMPSK(1)EDAIEHFMK	3	-0.38504	1	9508100	10284000	1.088
P09874	15	K	Poly [ADP-ribose] polymerase 1	PARP1	1	0.0523602	78.516	VEYAK(1)SGR	2	-0.45012	1	0	5230800
P09874	438	K	Poly [ADP-ribose] polymerase 1	PARP1	1	0.0158804	74.423	EVEK(1)MNK	2	-1.9508	1	2285600	1786900	0.729
P09874	548	K	Poly [ADP-ribose] polymerase 1	PARP1	1	9.24149e-05	72.167	GGAAVDPDSGLEHSAHVLEK(1)GGK	3	-0.1748	1	0	8618100
P09874	683	K	Poly [ADP-ribose] polymerase 1	PARP1	1	0.0143163	55.353	MIFDVESMK(1)K	2	-0.72239	3	27681000	26867000	0.923
P09874	653	K	Poly [ADP-ribose] polymerase 1	PARP1	1	4.05358e-08	125.98	FYPLEIDYGQDEEAVK(1)K	2	1.4219	1	0	10731000
P09936	123	K	Ubiquitin carboxyl-terminal hydrolase isozyme L1	UCHL1	1	1.31121e-08	140.82	QFLSETEK(1)MSPEDR	2	0.33546	2	16239000	16647000	1.179
P09936	71	K	Ubiquitin carboxyl-terminal hydrolase isozyme L1	UCHL1	1	5.4362e-18	199.96	QIEELK(1)GQEVSPK	2	-0.52626	1	6955100	13199000	1.793
P09936	105	K	Ubiquitin carboxyl-terminal hydrolase isozyme L1	UCHL1	1	6.07405e-06	72.469	QTIGNSCGTIGLIHAVANNQDK(1)LGFEDGSVLK	3	-1.5105	1	0	11091000
P09936	78	K	Ubiquitin carboxyl-terminal hydrolase isozyme L1	UCHL1	1	0.000714506	84.365	GQEVSPK(1)VYFMK	2	0.16102	1	19177000	23571000	1.146
P09936	195	K	Ubiquitin carboxyl-terminal hydrolase isozyme L1	UCHL1	1	2.41636e-06	90.758	MPFPVNHGASSEDTLLK(1)DAAK	3	-0.53142	3	42262000	55576000	1.123
P09960	337	K	Leukotriene A-4 hydrolase	LTA4H	1	0.00757254	97.068	LFGEK(1)FR	2	0.76402	1	19338000	40932000	1.962
P09960	418	K	Leukotriene A-4 hydrolase	LTA4H	1	0.000584027	87.641	FSYK(1)SITTDDWK	2	0.39352	1	3592000	6243300	2.207
P09960	580	K	Leukotriene A-4 hydrolase	LTA4H	1	9.37804e-11	147.12	DLAAFDK(1)SHDQAVR	2	1.1391	1	4890200	10943000	2.41
P09960	414	K	Leukotriene A-4 hydrolase	LTA4H	1	0.00327329	72.928	AYVEK(1)FSYK	2	3.853	1	34064000	25703000	0.673
P09960	58	K	Leukotriene A-4 hydrolase	LTA4H	1	0.0003423	115.12	SLVLDTK(1)DLTIEK	2	2.3497	1	0	19855000
P09972	42	K	Fructose-bisphosphate aldolase C	ALDOC	1	0.023881	50.874	GILAADESVGSMAK(1)R	2	-0.7037	1	0	2238700
P09972	101	K	Fructose-bisphosphate aldolase C	ALDOC	1	0.00104116	76.165	TIQDK(1)GIVVGIK	2	-0.084717	1	1953300	7310700	3.925
P09972	111	K	Fructose-bisphosphate aldolase C	ALDOC	1	2.91319e-20	148.1	VDK(1)GVVPLAGTDGETTTQGLDGLSER	3	-0.75637	3	142110000	94146000	0.931
P0C7V7	101	K	Putative signal peptidase complex catalytic subunit SEC11B	SEC11B	1	5.45896e-10	157.56	FLTK(1)GDNNAVDDR	2	0.97475	2	9717500	9511000	1.062
P0CW22	59	K	40S ribosomal protein S17-like	RPS17L	1	0.000393702	75.416	IAGYVTHLMK(1)R	3	-0.11498	2	24746000	43630000	1.664
P0CW22	32	K	40S ribosomal protein S17-like	RPS17L	1	4.21937e-05	133.89	LGNDFHTNK(1)R	2	0.62174	6	35753000	44779000	1.254
P0CW22	72	K	40S ribosomal protein S17-like	RPS17L	1	0.000302138	97.452	GISIK(1)LQEEER	2	-0.68948	1	6884700	12522000	2
P0CW22	19	K	40S ribosomal protein S17-like	RPS17L	1	0.00108303	89.029	VIIEK(1)YYTR	2	0.24847	2	175590000	218910000	1.333
P0CW22	44	K	40S ribosomal protein S17-like	RPS17L	1	0.00152904	74.987	VCEEIAIIPSK(1)K	2	-0.65442	1	154010000	225740000	1.596
P0DJI9	52	K	Serum amyloid A-2 protein	SAA2	1	0.000146527	118.24	EANYIGSDK(1)YFHAR	2	-0.60971	2	0	76064000
P0DJI9	64	K	Serum amyloid A-2 protein	SAA2	1	0.0251847	86.794	GNYDAAK(1)R	2	-0.37244	1	0	21146000
P0DMV9	71	K	Heat shock 70 kDa protein 1B	HSPA1A	1	6.42616e-24	197.47	NQVALNPQNTVFDAK(1)R	2	-0.7312	14	199100000	340990000	1.809
P0DMV9	328	K	Heat shock 70 kDa protein 1B	HSPA1A	1	4.29353e-19	185.2	LDK(1)AQIHDLVLVGGSTR	3	2.4664	11	505660000	824760000	1.697
P0DMV9	77	K	Heat shock 70 kDa protein 1B	HSPA1A	1	0.000619314	89.231	K(1)FGDPVVQSDMK	2	0.39417	2	5322000	7080900	1.73
P0DMV9	500	K	Heat shock 70 kDa protein 6	HSPA6	1	0.00574391	68.484	ANK(1)ITITNDK	2	-1.1429	2	16329000	29058000	1.75
P0DMV9	257	K	Heat shock 70 kDa protein 1B	HSPA1A	1	0.0142358	83.614	DISQNK(1)R	2	0.26193	3	79439000	150870000	1.865
P0DMV9	100	K	Heat shock 70 kDa protein 1B	HSPA1A	1	2.10886e-07	122.63	HWPFQVINDGDK(1)PK	2	3.7994	12	43786000	80382000	1.893
P0DMV9	595	K	Heat shock 70 kDa protein 1B	HSPA1A	1	0.00656806	108.24	DEFEHK(1)R	2	0.80555	5	10065000	15394000	1.422
P0DMV9	246	K	Heat shock 70 kDa protein 1B	HSPA1A	1	3.2879e-22	229.68	LVNHFVEEFK(1)R	2	0.63806	7	214380000	368490000	1.662
P0DMV9	512	K	Heat shock 70 kDa protein 1B	HSPA1A	1	0.0150312	65.224	LSK(1)EEIER	2	1.5227	2	9735600	12864000	2.012
P0DMV9	108	K	Heat shock 70 kDa protein 1B	HSPA1A	1	0.000587789	94.66	VQVSYK(1)GETK	2	-0.0041777	2	18422000	39687000	1.767
P0DMV9	451	K	Heat shock 70 kDa protein 6	HSPA6	1	0.00404052	70.412	AMTK(1)DNNLLGR	2	-0.30838	2	20816000	33133000	1.629
P0DMV9	112	K	Heat shock 70 kDa protein 1B	HSPA1A	1	6.23369e-09	119.76	GETK(1)AFYPEEISSMVLTK	3	-0.057655	2	2687300	9186600	1.9
P0DMV9	319	K	Heat shock 70 kDa protein 6	HSPA6	1	0.000171764	113.69	STLEPVEK(1)ALR	2	-0.6512	5	76078000	152190000	1.711
P0DMV9	56	K	Heat shock 70 kDa protein 1B	HSPA1A	1	2.58796e-29	190.37	LIGDAAK(1)NQVALNPQNTVFDAK	2	-0.58408	3	105080000	185090000	1.753
P0DMV9	507	K	Heat shock 70 kDa protein 6	HSPA6	1	4.61126e-05	139.98	ITITNDK(1)GR	2	0.021752	9	551080000	644190000	1.25
P0DMV9	539	K	Heat shock 70 kDa protein 1B	HSPA1A	1	0.00318559	88.768	VSAK(1)NALESYAFNMK	2	-1.1661	1	0	7985800
P0DMV9	573	K	Heat shock 70 kDa protein 1B	HSPA1A	1	9.0862e-28	164.46	VLDK(1)CQEVISWLDANTLAEKDEFEHK	4	-0.10694	3	21026000	49524000	1.824
P10155	369	K	60 kDa SS-A/Ro ribonucleoprotein	TROVE2	1	0.0073252	83.206	TVEPTGK(1)R	2	0.77545	1	8445800	10242000	1.191
P10155	216	K	60 kDa SS-A/Ro ribonucleoprotein	TROVE2	1	0.0533064	44.207	EK(1)ALSVETEK	2	0.6007	1	6661800	8481500	1.443
P10253	162	K	Lysosomal alpha-glucosidase	GAA	1	0.0056045	57.788	TTPTFFPK(1)DILTLR	2	0.22835	2	7989900	3354300	0.49
P10253	418	K	Lysosomal alpha-glucosidase	GAA	1	5.05948e-05	129.85	DFTFNK(1)DGFR	2	0.32278	1	5945800	3009500	0.52
P10412	32	K	Histone H1.4	HIST1H1E	1	0.0129719	86.866	SAGAAK(1)R	2	0.49311	3	24460000	15695000	0.618
P10412	148	K	Histone H1.4	HIST1H1E	1	0.00163831	83.647	ATGAATPK(1)K	2	-0.53276	2	6594800	5264800	0.774
P10412	168	K	Histone H1.4	HIST1H1E	0.999999	0.0581007	64.374	KPAAAAGAK(1)K	2	0.58367	1	2651800	2312300	0.841
P10515	362	K	Dihydrolipoyllysine-residue acetyltransferase component of pyruvate dehydrogenase complex, mitochondrial	DLAT	1	0.0166217	53.756	VFVSPLAK(1)K	2	1.3589	2	68615000	88740000	1.35
P10515	641	K	Dihydrolipoyllysine-residue acetyltransferase component of pyruvate dehydrogenase complex, mitochondrial	DLAT	1	0.00880283	67.334	YLEK(1)PITMLL	2	0.73668	1	0	0
P10515	368	K	Dihydrolipoyllysine-residue acetyltransferase component of pyruvate dehydrogenase complex, mitochondrial	DLAT	1	0.000105982	97.631	LAVEK(1)GIDLTQVK	2	0.85788	2	14559000	17557000	1.131
P10599	8	K	Thioredoxin	TXN	1	6.71798e-49	265.08	QIESK(1)TAFQEALDAAGDK	3	-0.34523	3	50629000	126360000	1.382
P10599	39	K	Thioredoxin	TXN	1	0.000890297	70.089	MIK(1)PFFHSLSEK	3	0.53457	2	21241000	30831000	1.336
P10599	85	K	Thioredoxin	TXN	1	0.000129992	112.96	GQK(1)VGEFSGANK	2	0.22783	4	24708000	34456000	1.551
P10599	3	K	Thioredoxin	TXN	1	0.00107735	136.11	VK(1)QIESK	2	1.191	3	74981000	130380000	1.891
P10599	94	K	Thioredoxin	TXN	1	0.00493291	68.676	VGEFSGANK(1)EK	2	-1.8529	1	18959000	22222000	0.977
P10599	96	K	Thioredoxin	TXN	1	6.19535e-08	152.07	EK(1)LEATINELV	2	0.1075	2	63508000	88476000	1.415
P10606	86	K	Cytochrome c oxidase subunit 5B, mitochondrial	COX5B	1	0.000205785	95.264	EDPNLVPSISNK(1)R	2	0.001262	2	21998000	25251000	1.206
P10620	42	K	Microsomal glutathione S-transferase 1	MGST1	1	2.85303e-07	119.96	K(1)VFANPEDCVAFGK	2	-0.85029	4	87955000	102100000	1.202
P10620	55	K	Microsomal glutathione S-transferase 1	MGST1	1	1.88572e-18	190.18	VFANPEDCVAFGK(1)GENAK	2	0.086591	1	0	14359000
P10768	198	K	S-formylglutathione hydrolase	ESD	1	0.00163968	99.686	AFSGYLGTDQSK(1)WK	2	-0.025217	1	0	19914000
P10809	130	K	60 kDa heat shock protein, mitochondrial	HSPD1	1	0.0150312	65.224	EGFEK(1)ISK	2	0.99388	4	86240000	90688000	1.006
P10809	387	K	60 kDa heat shock protein, mitochondrial	HSPD1	1	8.73049e-27	190.25	IQEIIEQLDVTTSEYEK(1)EK	2	-0.19132	2	128990000	131740000	1.026
P10809	523	K	60 kDa heat shock protein, mitochondrial	HSPD1	1	0.000239025	109.66	GIIDPTK(1)VVR	2	0.60765	12	612310000	622810000	1.065
P10809	91	K	60 kDa heat shock protein, mitochondrial	HSPD1	1	8.86396e-05	150.18	DKYK(1)NIGAK	2	0.85099	3	26522000	30470000	1.149
P10809	469	K	60 kDa heat shock protein, mitochondrial	HSPD1	1	0.00139207	130.27	IGIEIIK(1)R	2	0.24619	7	259450000	261400000	0.979
P10809	205	K	60 kDa heat shock protein, mitochondrial	HSPD1	1	1.4719e-12	151.44	DGK(1)TLNDELEIIEGMK	2	-0.16102	7	50636000	53665000	1.122
P10809	87	K	60 kDa heat shock protein, mitochondrial	HSPD1	1	0.0356704	57.177	SIDLK(1)DK	2	0.029616	1	80820000	87630000	1.047
P10809	352	K	60 kDa heat shock protein, mitochondrial	HSPD1	1	2.60259e-06	117.2	VGEVIVTK(1)DDAMLLK	2	0.54936	2	29721000	22621000	0.929
P10809	72	K	60 kDa heat shock protein, mitochondrial	HSPD1	1	5.07787e-07	119.45	TVIIEQSWGSPK(1)VTK	2	0.97222	3	18016000	16938000	0.847
P10809	125	K	60 kDa heat shock protein, mitochondrial	HSPD1	1	0.00102168	90.15	SIAK(1)EGFEK	2	0.38153	2	194810000	198670000	1.026
P10809	364	K	60 kDa heat shock protein, mitochondrial	HSPD1	1	8.65414e-05	140.14	GKGDK(1)AQIEK	2	-0.30726	5	176390000	195220000	1.093
P10809	133	K	60 kDa heat shock protein, mitochondrial	HSPD1	1	0.0097256	84.169	ISK(1)GANPVEIR	2	-0.67276	1	0	28050000
P10809	473	K	60 kDa heat shock protein, mitochondrial	HSPD1	1	0.0421734	46.643	TLK(1)IPAMTIAK	2	-0.19792	1	10332000	13562000	1.076
P10809	359	K	60 kDa heat shock protein, mitochondrial	HSPD1	1	0.0113641	58.433	DDAMLLK(1)GK	2	-0.59398	2	19464000	20097000	1.039
P10809	75	K	60 kDa heat shock protein, mitochondrial	HSPD1	1	0.000250295	108.9	VTK(1)DGVTVAK	2	0.51753	6	155890000	159130000	1.041
P10809	156	K	60 kDa heat shock protein, mitochondrial	HSPD1	1	4.95653e-05	89.911	GVMLAVDAVIAELK(1)K	2	-1.3575	7	45317000	38583000	0.935
P10809	250	K	60 kDa heat shock protein, mitochondrial	HSPD1	1	4.09825e-11	135.29	K(1)ISSIQSIVPALEIANAHR	3	2.6981	1	0	16119000
P10809	236	K	60 kDa heat shock protein, mitochondrial	HSPD1	1	7.55489e-09	135.23	GQK(1)CEFQDAYVLLSEK	3	-0.37813	2	39991000	36156000	0.898
P10809	417	K	60 kDa heat shock protein, mitochondrial	HSPD1	1	3.52896e-32	251.3	VGGTSDVEVNEK(1)K	2	-0.43928	3	80166000	77402000	1.043
P10809	249	K	60 kDa heat shock protein, mitochondrial	HSPD1	1	1.23103e-07	132.51	CEFQDAYVLLSEK(1)K	3	-0.017271	5	83249000	80679000	1.023
P10809	202	K	60 kDa heat shock protein, mitochondrial	HSPD1	1	0.000287753	132.62	KGVITVK(1)DGK	2	0.44445	5	109110000	104460000	0.994
P10809	396	K	60 kDa heat shock protein, mitochondrial	HSPD1	1	0.000929643	78.964	LAK(1)LSDGVAVLK	2	-0.59702	5	106560000	94407000	0.974
P10809	191	K	60 kDa heat shock protein, mitochondrial	HSPD1	1	1.47429e-06	134.49	EIGNIISDAMK(1)K	2	-0.43414	34	1479400000	1490000000	1.036
P10809	89	K	60 kDa heat shock protein, mitochondrial	HSPD1	0.995657	0.00379826	63.076	SIDLK(0.004)DK(0.996)YK	3	-1.049	3	16829000	19526000	1.031
P10809	196	K	60 kDa heat shock protein, mitochondrial	HSPD1	1	0.0104425	93.374	K(1)GVITVK	2	-0.019522	1	16828000	19100000	1.057
P10809	31	K	60 kDa heat shock protein, mitochondrial	HSPD1	1	0.00162349	79.148	DVK(1)FGADAR	2	0.50354	3	268300000	253760000	0.968
P10909	78	K	Clusterin	CLU	1	8.37829e-06	126.71	TLLSNLEEAK(1)K	2	-0.63748	1	18099000	46905000	2.601
P11021	152	K	78 kDa glucose-regulated protein	HSPA5	1	2.29773e-12	144.29	TFAPEEISAMVLTK(1)MK	3	-1.6895	5	59821000	90674000	1.597
P11021	621	K	78 kDa glucose-regulated protein	HSPA5	1	1.83796e-09	145.43	K(1)ELEEIVQPIISK	2	2.4742	4	29874000	57249000	1.485
P11021	370	K	78 kDa glucose-regulated protein	HSPA5	1	0.000355162	116.37	IPK(1)IQQLVK	2	0.79946	4	46858000	86296000	1.603
P11021	446	K	78 kDa glucose-regulated protein	HSPA5	1	0.00630637	89.355	NTVVPTK(1)K	2	0.18301	8	232740000	371230000	1.591
P11021	118	K	78 kDa glucose-regulated protein	HSPA5	1	0.0017864	76.17	FLPFK(1)VVEK	2	-0.434	2	15615000	24351000	1.697
P11021	523	K	78 kDa glucose-regulated protein	HSPA5	1	6.3614e-10	137.89	NK(1)ITITNDQNR	2	0.056692	2	6891600	9199500	1.42
P11021	579	K	78 kDa glucose-regulated protein	HSPA5	1	0.0177742	61.602	NQIGDK(1)EK	2	0.89307	2	2992500	5383700	1.643
P11021	617	K	78 kDa glucose-regulated protein	HSPA5	1	9.88395e-86	329.1	IEWLESHQDADIEDFK(1)AK	2	-0.69304	3	193790000	269940000	1.515
P11021	353	K	78 kDa glucose-regulated protein	HSPA5	1	1.19839e-15	172.91	K(1)SDIDEIVLVGGSTR	2	0.1279	4	29423000	40990000	1.23
P11021	474	K	78 kDa glucose-regulated protein	HSPA5	1	2.42581e-22	157.66	VYEGERPLTK(1)DNHLLGTFDLTGIPPAPR	3	0.39248	2	16721000	33047000	2.263
P11021	154	K	78 kDa glucose-regulated protein	HSPA5	1	0.000904925	85.522	MK(1)ETAEAYLGK	2	0.06048	4	77854000	147560000	1.695
P11021	352	K	78 kDa glucose-regulated protein	HSPA5	1	0.011295	61.78	VLEDSDLK(1)K	2	-0.13338	12	712820000	1110400000	1.6
P11021	344	K	78 kDa glucose-regulated protein	HSPA5	1	2.33384e-06	130.77	PVQK(1)VLEDSDLK	2	0.80847	1	0	12700000
P11021	376	K	78 kDa glucose-regulated protein	HSPA5	1	2.11932e-17	194.17	IQQLVK(1)EFFNGK	2	0.068269	3	23475000	35645000	1.6
P11021	96	K	78 kDa glucose-regulated protein	HSPA5	1	5.30289e-39	230.86	NQLTSNPENTVFDAK(1)R	3	0.92025	15	332070000	550830000	1.611
P11021	553	K	78 kDa glucose-regulated protein	HSPA5	1	0.0415905	82.305	FAEEDK(1)K	2	0.37543	1	0	0
P11021	185	K	78 kDa glucose-regulated protein	HSPA5	1	2.13524e-08	118.52	QATK(1)DAGTIAGLNVMR	2	-1.0854	1	0	0
P11021	547	K	78 kDa glucose-regulated protein	HSPA5	1	1.5568e-14	172.82	MVNDAEK(1)FAEEDKK	2	-1.5902	9	78219000	140420000	1.795
P11021	213	K	78 kDa glucose-regulated protein	HSPA5	1	5.96526e-10	141.22	IINEPTAAAIAYGLDK(1)R	3	0.27194	15	529600000	737810000	1.402
P11021	268	K	78 kDa glucose-regulated protein	HSPA5	1	0.00172837	106.4	VMEHFIK(1)LYK	2	-0.19566	1	0	7724700
P11021	581	K	78 kDa glucose-regulated protein	HSPA5	0.99239	0.000136847	117.95	NQIGDK(0.008)EK(0.992)LGGK	3	0.030524	4	16612000	45731000	3.249
P11021	601	K	78 kDa glucose-regulated protein	HSPA5	1	1.47543e-46	252.47	AVEEK(1)IEWLESHQDADIEDFK	4	0.050435	8	472690000	775170000	1.57
P11021	163	K	78 kDa glucose-regulated protein	HSPA5	1	0.00762319	72.275	ETAEAYLGK(1)K	2	0.10455	12	515080000	848910000	1.622
P11021	81	K	78 kDa glucose-regulated protein	HSPA5	1	3.19358e-48	240.91	LIGDAAK(1)NQLTSNPENTVFDAK	3	0.33542	6	173440000	286360000	1.638
P11021	382	K	78 kDa glucose-regulated protein	HSPA5	1	0.000226134	110.53	EFFNGK(1)EPSR	2	0.52085	3	16039000	24574000	1.485
P11021	164	K	78 kDa glucose-regulated protein	HSPA5	1	0.000903809	56.036	K(1)VTHAVVTVPAYFNDAQR	3	-0.43706	2	12823000	21591000	1.687
P11021	573	K	78 kDa glucose-regulated protein	HSPA5	1	1.49757e-14	163.34	NELESYAYSLK(1)NQIGDK	3	0.20984	2	18865000	26072000	1.625
P11021	113	K	78 kDa glucose-regulated protein	HSPA5	1	1.25854e-12	144.97	TWNDPSVQQDIK(1)FLPFK	2	-1.611	4	33273000	51739000	1.722
P11142	524	K	Heat shock cognate 71 kDa protein	HSPA8	1	0.000349696	103.55	MVQEAEK(1)YK	2	-0.91401	9	94826000	127460000	1.355
P11142	71	K	Heat shock cognate 71 kDa protein	HSPA8	1	3.04911e-24	203.27	NQVAMNPTNTVFDAK(1)R	3	-0.3084	39	858280000	956200000	1.123
P11142	328	K	Heat shock cognate 71 kDa protein	HSPA8	1	1.72203e-13	161.55	LDK(1)SQIHDIVLVGGSTR	3	-0.73559	10	165030000	185790000	1.149
P11142	102	K	Heat shock cognate 71 kDa protein	HSPA8	1	0.00311373	108.81	PK(1)VQVEYK	2	-0.057086	2	40089000	44008000	1.281
P11142	500	K	Heat shock cognate 71 kDa protein	HSPA8	1	0.00166668	75.566	ENK(1)ITITNDK	2	-0.25871	2	69862000	75820000	1.101
P11142	126	K	Heat shock cognate 71 kDa protein	HSPA8	1	6.19364e-07	106.6	SFYPEEVSSMVLTK(1)MK	2	-0.89736	7	78585000	82749000	1.11
P11142	159	K	Heat shock cognate 71 kDa protein	HSPA8	1	1.20773e-17	168.1	QATK(1)DAGTIAGLNVLR	2	-0.98004	1	14398000	14221000	1.103
P11142	246	K	Heat shock cognate 71 kDa protein	HSPA8	1	2.6055e-08	159.94	MVNHFIAEFK(1)R	3	0.51277	13	1113200000	1219700000	1.13
P11142	128	K	Heat shock cognate 71 kDa protein	HSPA8	1	6.73301e-05	115.33	MK(1)EIAEAYLGK	2	-0.018894	8	397160000	413330000	1.16
P11142	251	K	Heat shock cognate 71 kDa protein	HSPA8	1	0.00166193	85.67	K(1)DISENKR	2	-0.19266	2	42921000	50149000	1.198
P11142	3	K	Heat shock cognate 71 kDa protein	HSPA8	1	1.10681e-30	191.4	SK(1)GPAVGIDLGTTYSCVGVFQHGK	3	0.10492	1	14368000	14981000	1.135
P11142	108	K	Heat shock cognate 71 kDa protein	HSPA8	1	4.73457e-06	143.5	VQVEYK(1)GETK	2	-0.53828	2	45929000	53558000	1.171
P11142	451	K	Heat shock cognate 71 kDa protein	HSPA8	1	0.00113255	81.017	AMTK(1)DNNLLGK	2	1.6951	4	53034000	67658000	1.274
P11142	601	K	Heat shock cognate 71 kDa protein	HSPA8	1	3.47412e-06	120.87	ELEK(1)VCNPIITK	2	-0.23917	3	109580000	125950000	1.203
P11142	112	K	Heat shock cognate 71 kDa protein	HSPA8	1	3.05506e-09	123.63	GETK(1)SFYPEEVSSMVLTK	3	-1.5353	3	13307000	15819000	1.026
P11142	137	K	Heat shock cognate 71 kDa protein	HSPA8	1	3.09702e-09	95.319	EIAEAYLGK(1)TVTNAVVTVPAYFNDSQR	3	-1.0553	3	34957000	28072000	0.883
P11142	348	K	Heat shock cognate 71 kDa protein	HSPA8	1	1.74812e-13	177.57	IQK(1)LLQDFFNGK	2	0.84695	5	31323000	35277000	0.753
P11142	319	K	Heat shock cognate 71 kDa protein	HSPA8	1	1.09135e-06	139.86	GTLDPVEK(1)ALR	2	-0.41724	6	511840000	567140000	1.184
P11142	56	K	Heat shock cognate 71 kDa protein	HSPA8	1	2.88256e-38	222.39	LIGDAAK(1)NQVAMNPTNTVFDAK	2	-1.488	6	186790000	239500000	1.359
P11142	357	K	Heat shock cognate 71 kDa protein	HSPA8	1	4.81637e-17	153.81	LLQDFFNGK(1)ELNK	2	1.1972	4	3834500	78041000	1.547
P11142	539	K	Heat shock cognate 71 kDa protein	HSPA8	1	6.54425e-08	130.47	VSSK(1)NSLESYAFNMK	2	0.62123	1	6943400	6658800	1.018
P11142	507	K	Heat shock cognate 71 kDa protein	HSPA8	1	4.61126e-05	139.98	ITITNDK(1)GR	2	0.021752	9	551080000	644190000	1.25
P11142	550	K	Heat shock cognate 71 kDa protein	HSPA8	1	2.19991e-19	184.2	NSLESYAFNMK(1)ATVEDEK	2	-0.71948	2	7099100	8397400	1.114
P11142	187	K	Heat shock cognate 71 kDa protein	HSPA8	1	3.49733e-13	159.69	IINEPTAAAIAYGLDK(1)K	2	1.9141	25	1001300000	1146200000	1.171
P11142	573	K	Heat shock cognate 71 kDa protein	HSPA8	1	2.72927e-11	159.22	ILDK(1)CNEIINWLDK	2	0.48056	2	12194000	13237000	1.078
P11166	245	K	Solute carrier family 2, facilitated glucose transporter member 1	SLC2A1	1	1.26256e-13	157.11	GTADVTHDLQEMK(1)EESR	3	-0.81311	1	7705200	17595000	2.286
P11177	184	K	Pyruvate dehydrogenase E1 component subunit beta, mitochondrial	PDHB	1	8.9484e-05	90.476	VVSPWNSEDAK(1)GLIK	2	-0.19568	1	6635500	6393700	1.137
P11182	196	K	Lipoamide acyltransferase component of branched-chain alpha-keto acid dehydrogenase complex, mitochondrial	DBT	1	7.71721e-05	110.8	LSEVVGSGK(1)DGR	2	1.8078	2	8867600	8600000	0.787
P11216	359	K	Glycogen phosphorylase, brain form	PYGB	1	0.0100671	84.365	ILVDVEK(1)VDWDK	2	0.24007	1	0	6622600
P11216	597	K	Glycogen phosphorylase, brain form	PYGB	1	0.00205409	91.087	DPAK(1)AFVPR	2	1.3774	1	0	0
P11216	552	K	Glycogen phosphorylase, brain form	PYGB	1	0.00786326	64.82	FSAFLEK(1)EYK	2	-1.0537	1	8092100	14914000	2.269
P11216	569	K	Glycogen phosphorylase, brain form	PYGB	1	0.000183759	77.185	INPSSMFDVHVK(1)R	3	-0.22218	2	4051400	8157000	1.71
P11216	438	K	Glycogen phosphorylase, brain form	PYGB	1	1.06079e-13	152.7	MSVIEEGDCK(1)R	2	0.59272	1	0	0
P11216	520	K	Glycogen phosphorylase, brain form	PYGB	1	6.2464e-22	206.49	IGEEFLTDLSQLK(1)K	2	0.61657	2	12146000	24021000	1.837
P11216	42	K	Glycogen phosphorylase, liver form	PYGL	1	0.00019291	92.538	HLHFTLVK(1)DR	3	0.26601	2	17865000	24862000	1.376
P11216	10	K	Glycogen phosphorylase, brain form	PYGB	1	0.00551766	94.114	PLTDSEK(1)R	2	0.53254	1	14981000	27341000	1.894
P11216	290	K	Glycogen phosphorylase, liver form	PYGL	1	1.6663e-10	148.41	VLYPNDNFFEGK(1)ELR	2	2.9589	2	0	20942000
P11233	166	K	Ras-related protein Ral-A	RALA	1	4.17996e-13	165.35	ANVDK(1)VFFDLMR	2	-0.50758	2	5955800	8426300	1.111
P11233	115	K	Ras-related protein Ral-A	RALA	1	1.56438e-15	165.49	VK(1)EDENVPFLLVGNK	2	1.4754	1	7520900	11435000	1.588
P11279	337	K	Lysosome-associated membrane glycoprotein 1	LAMP1	1	2.80753e-11	124.63	ALQATVGNSYK(1)CNAEEHVR	3	-0.9722	2	31389000	26659000	0.893
P11387	271	K	DNA topoisomerase 1	TOP1	1	1.29522e-10	158.42	MLDHEYTTK(1)EIFR	2	-0.53236	4	98175000	143000000	1.501
P11387	333	K	DNA topoisomerase 1	TOP1	0.955745	0.00708263	119.74	IK(0.044)EENEK(0.956)LLK	2	1.36	1	0	9711400
P11387	443	K	DNA topoisomerase 1	TOP1	1	0.000555389	101.65	DWQK(1)YETAR	2	1.0392	1	14003000	15932000	1.166
P11387	245	K	DNA topoisomerase 1	TOP1	1	0.0294277	45.368	FYYDGK(1)VMK	2	0.47297	1	3521600	3209800	1.044
P11387	655	K	DNA topoisomerase 1	TOP1	1	0.00383901	107.57	K(1)EQLADAR	2	0.86343	1	9503600	12749000	1.385
P11387	347	K	DNA topoisomerase 1	TOP1	1	3.81677e-06	117.2	EYGFCIMDNHK(1)ER	3	-0.64707	3	27998000	33860000	1.278
P11387	587	K	DNA topoisomerase 1	TOP1	1	3.1321e-06	107.69	HLQDLMEGLTAK(1)VFR	3	-0.46075	1	12188000	17625000	1.458
P11387	223	K	DNA topoisomerase 1	TOP1	1	0.000158651	64.761	FLEHK(1)GPVFAPPYEPLPENVK	3	0.56109	2	12511000	25718000	1.924
P11388	1433	K	DNA topoisomerase 2-alpha	TOP2A	1	0.0043938	69.03	SQSSTSTTGAK(1)K	2	0.55517	1	920360	2287500	2.359
P11388	662	K	DNA topoisomerase 2-alpha	TOP2A	1	7.4879e-06	128.36	K(1)EWLTNFMEDR	2	-0.5966	2	5431800	5510500	1.736
P11388	1058	K	DNA topoisomerase 2-alpha	TOP2A	1	0.00487624	70.056	FILEK(1)IDGK	2	0.27672	4	23670000	40304000	1.852
P11388	1159	K	DNA topoisomerase 2-alpha	TOP2A	1	0.00138934	101.65	EQELDTLK(1)R	2	-0.24081	1	0	0
P11388	342	K	DNA topoisomerase 2-alpha	TOP2A	1	0.0422856	57.281	LVDVVK(1)K	2	0.9572	1	17316000	33259000	1.847
P11388	1070	K	DNA topoisomerase 2-alpha	TOP2A	0.987803	0.000509712	133.58	IIIENK(0.012)PK(0.988)K	2	0.35157	4	39389000	79298000	2.024
P11388	632	K	DNA topoisomerase 2-alpha	TOP2A	1	0.0350969	50.04	EYFADMK(1)R	2	0.63977	1	9499600	7518400	0.964
P11388	480	K	DNA topoisomerase 2-alpha	TOP2A	1	0.00072898	95.502	DK(1)YGVFPLR	2	1.2271	2	9715500	20520000	2.156
P11388	1141	K	DNA topoisomerase 2-alpha	TOP2A	0.987521	0.0415984	85.676	EK(0.012)K(0.988)DELCR	2	-0.25695	1	1190300	2006600	1.733
P11388	265	K	DNA topoisomerase 2-alpha	TOP2A	1	0.0398038	53.576	LPVK(1)GFR	2	-0.6557	1	4399300	8440400	2.16
P11388	1062	K	DNA topoisomerase 2-alpha	TOP2A	0.999995	0.0022399	58.781	IDGK(1)IIIENKPK	3	0.42959	1	6682900	12394000	1.97
P11388	1011	K	DNA topoisomerase 2-alpha	TOP2A	1	5.14236e-05	131.82	K(1)YDTVLDILR	2	0.066422	1	5469900	9227700	1.701
P11388	278	K	DNA topoisomerase 2-alpha	TOP2A	1	0.000454849	110.08	DK(1)LDETGNSLK	2	0.22659	1	0	8618900
P11388	529	K	DNA topoisomerase 2-alpha	TOP2A	1	2.7428e-09	149.23	NYEDEDSLK(1)TLR	2	0.16632	1	8426400	12446000	1.858
P11388	798	K	DNA topoisomerase 2-alpha	TOP2A	1	0.00482285	52.247	LHGGK(1)DSASPR	3	0.64811	1	3748000	6042000	1.725
P11388	1151	K	DNA topoisomerase 2-alpha	TOP2A	1	4.45885e-08	155.48	NEK(1)EQELDTLK	2	-1.9417	1	41426000	38040000	1.407
P11413	476	K	Glucose-6-phosphate 1-dehydrogenase	G6PD	1	5.42642e-06	98.676	IFTPLLHQIELEK(1)PK	3	0.36297	1	7663400	14530000	1.655
P11413	95	K	Glucose-6-phosphate 1-dehydrogenase	G6PD	1	0.0170591	62.546	ATPEEK(1)LK	2	1.5868	2	25703000	38905000	1.513
P11413	497	K	Glucose-6-phosphate 1-dehydrogenase	G6PD	1	3.08969e-10	167.12	GPTEADELMK(1)R	2	-1.6137	9	379880000	573020000	1.461
P11413	97	K	Glucose-6-phosphate 1-dehydrogenase	G6PD	1	2.65958e-05	141.48	LK(1)LEDFFAR	2	-0.33015	4	43937000	64962000	1.342
P11413	386	K	Glucose-6-phosphate 1-dehydrogenase	G6PD	1	1.84247e-39	239.18	LQFHDVAGDIFHQQCK(1)R	3	-0.93604	15	752990000	954640000	1.296
P11413	514	K	Glucose-6-phosphate 1-dehydrogenase	G6PD	1	0.0158529	79.454	WVNPHK(1)L	2	-0.25936	3	68965000	108290000	1.562
[truncated: 5,137 more rows]

## Sheet: repeat2
Protein accession	Position	Amino acid	Protein description	Gene name	Localization probability	PEP	Score	Modified sequence	Charge	Mass error [ppm]	MS/MS Count	H	L	L/H Ratio
[truncated: 6,432 more rows]

[truncated: 1 more sheets: repeat3]
